# Supplementary material for: CRISPRO: identification of functional protein coding sequences based on genome editing dense mutagenesis
Source: PubMed Central journal article supplement (PMC6195731; doi:10.1186/s13059-018-1563-5), 2018-10-19
Supplement: 13059_2018_1563_MOESM1_ESM.pdf [file 13059_2018_1563_MOESM1_ESM.pdf]

**A**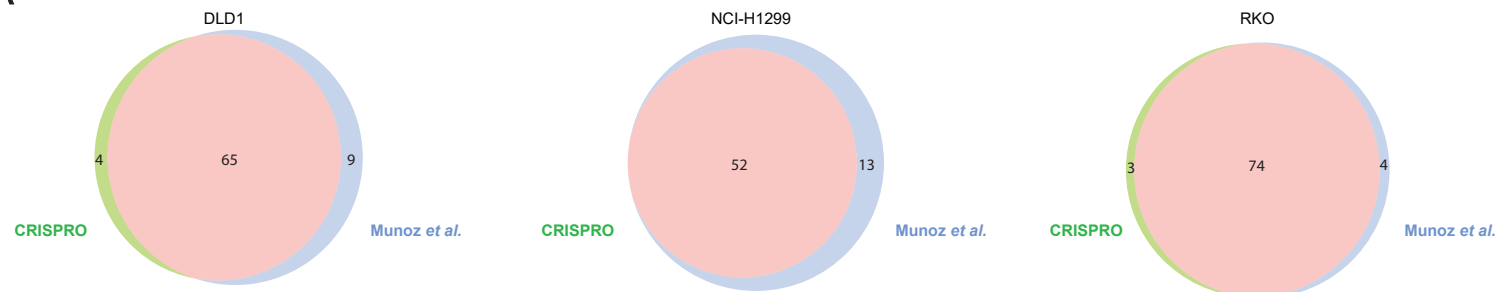**B**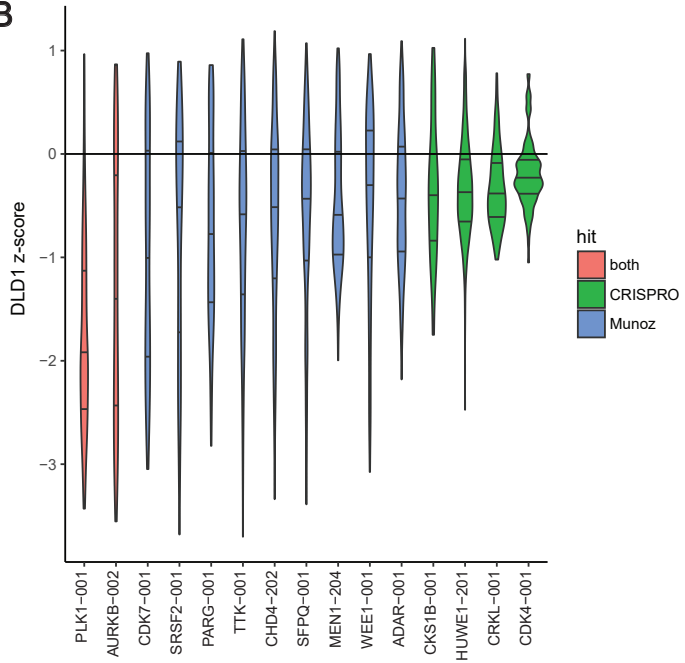**C**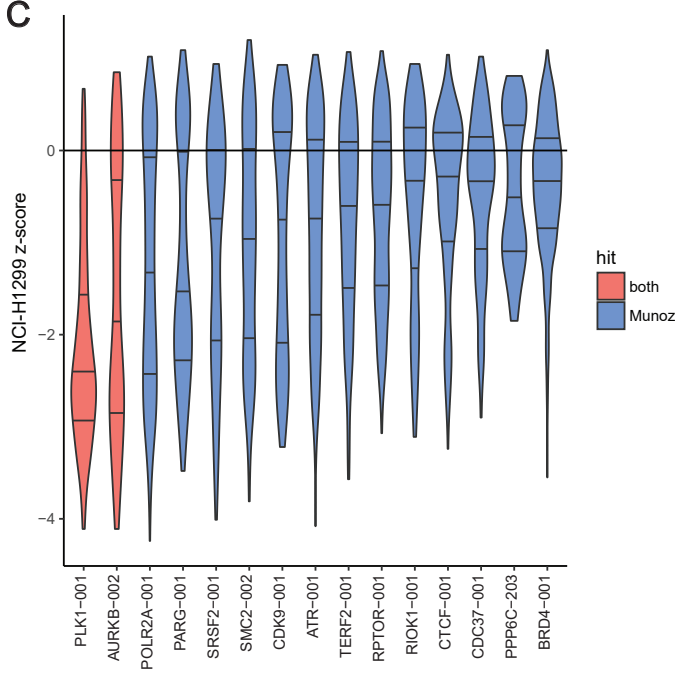**D**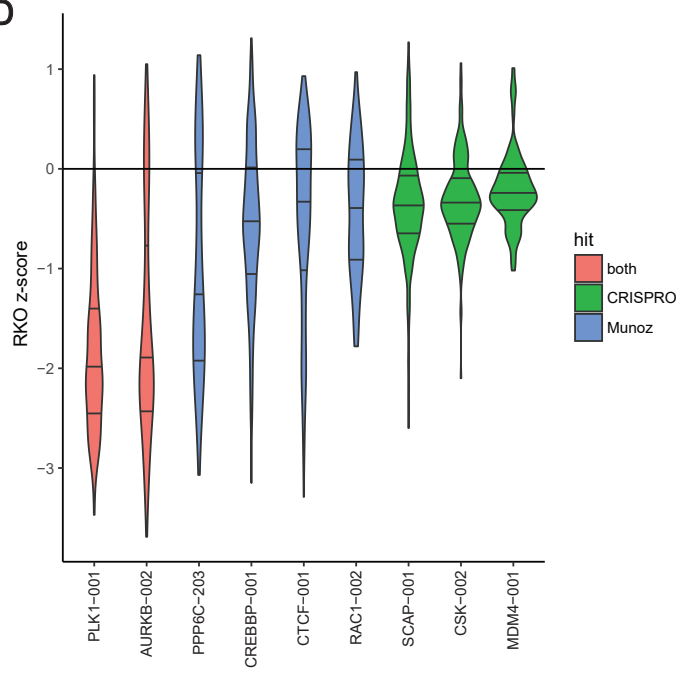**Figure S1 Hit genes.**

**A)** Venn diagrams for each of 3 cell lines, showing assigned number of hit genes per method of CRISPRO and Munoz *et al.*. Munoz *et al.* defined hits by setting a cut-off at an average z-score of -0.4, defining 74 (DLD1), 65 (NCI-H1299), and 78 (RKO) hits. Out of the hits set by Munoz *et al.*, CRISPRO identified 65, 52, and 74 hits from DLD1, NCI-H1299, and RKO, missing a few hits which had a mean just below the -0.4 cut-off, with a relatively large standard deviation. Hits unique to CRISPRO had average z-scores close to -0.4, but had a smaller distribution of scores (Supplementary Table 1). CRISPRO assigned 4 and 3 additional hits for DLD1 and RKO cell lines. **B-D)** Violin plots for hits uniquely defined by CRISPRO or Munoz *et al.*, with two example hits identified by both methods (PLK1 and AURKB) for each cell line: **(B)** DLD1, **(C)** NCI-H1299, **(D)** RKO.

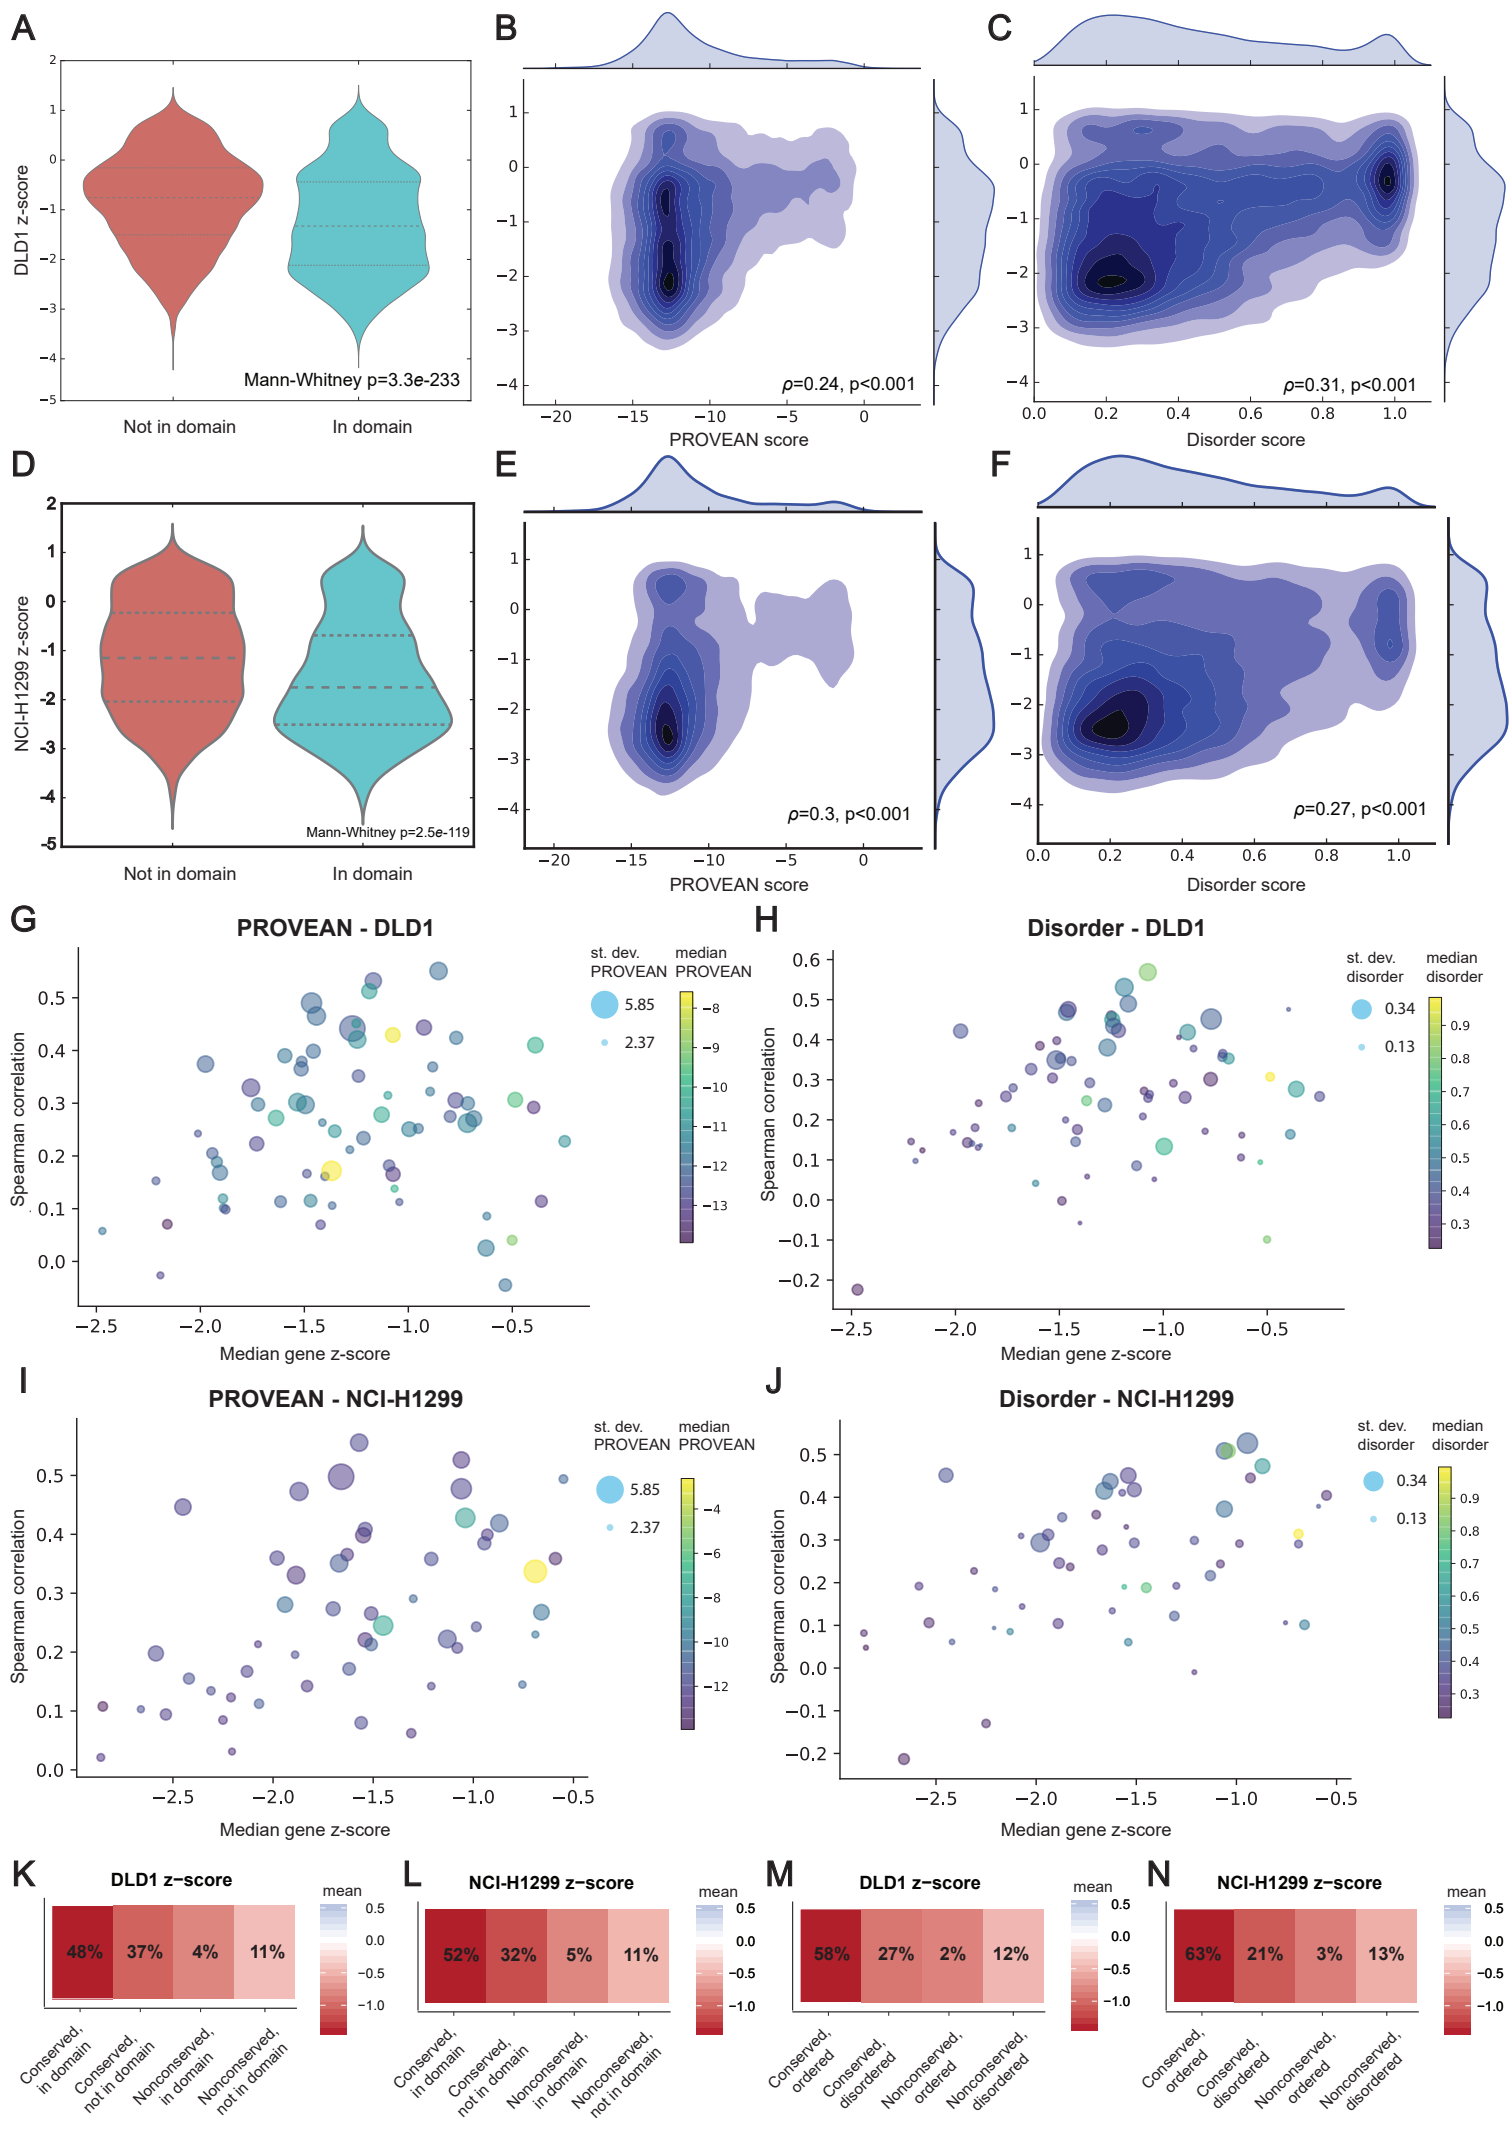

**Figure S2 Correlation of annotations to functional scores for cell lines DLD1 and NCI-H1299, similar to Figure 2.**

**A)** Violin plot showing the distribution difference for guide RNA DLD1 z-scores targeting inside versus outside of predicted domains (as defined by InterPro). **B)** Density plot showing the relation between DLD1 z-score and PROVEAN score (more negative is more conserved). **C)** Density plot showing the relation between DLD1 z-score and disorder scores (1 equals disorder, 0 equals order). **D)** Violin plot showing the distribution difference for guide RNA NCI-H1299 z-scores targeting domains versus targeting outside of predicted domains (as defined by InterPro). **E)** Density plot showing the relation between NCI-H1299 z-score and PROVEAN score (more negative is more conserved). **F)** Density plot showing the relation between NCI-H1299 z-score and disorder scores (1 equals disorder, 0 equals order). **G)** Scatter plot showing the relation of median DLD1 z-score (x-axis), standard deviation (distribution) of PROVEAN score (marker size), and the median of the PROVEAN score (marker color) with the amount of correlation between PROVEAN scores and DLD1 z-scores (y-axis), for every transcript. **H)** See **G**, here for disorder and DLD1 z-score. **I)** see **G**, here for NI-H1299 scores. **J)** See **G**, here for disorder and NCI-H1299 z-scores. **K)** Heatmap showing the mean DLD1 z-score and the percentage guide RNAs falling into groups categorized based on domain annotation and conservation. **L)** See **K**, here for NCI-H1299 z-scores. **M)** Heatmap showing the mean DLD1 z-score and the percentage guide RNAs falling into groups categorized based on conservation and disorder score. **N)** See **M**, here for NCI-H1299 z-scores.

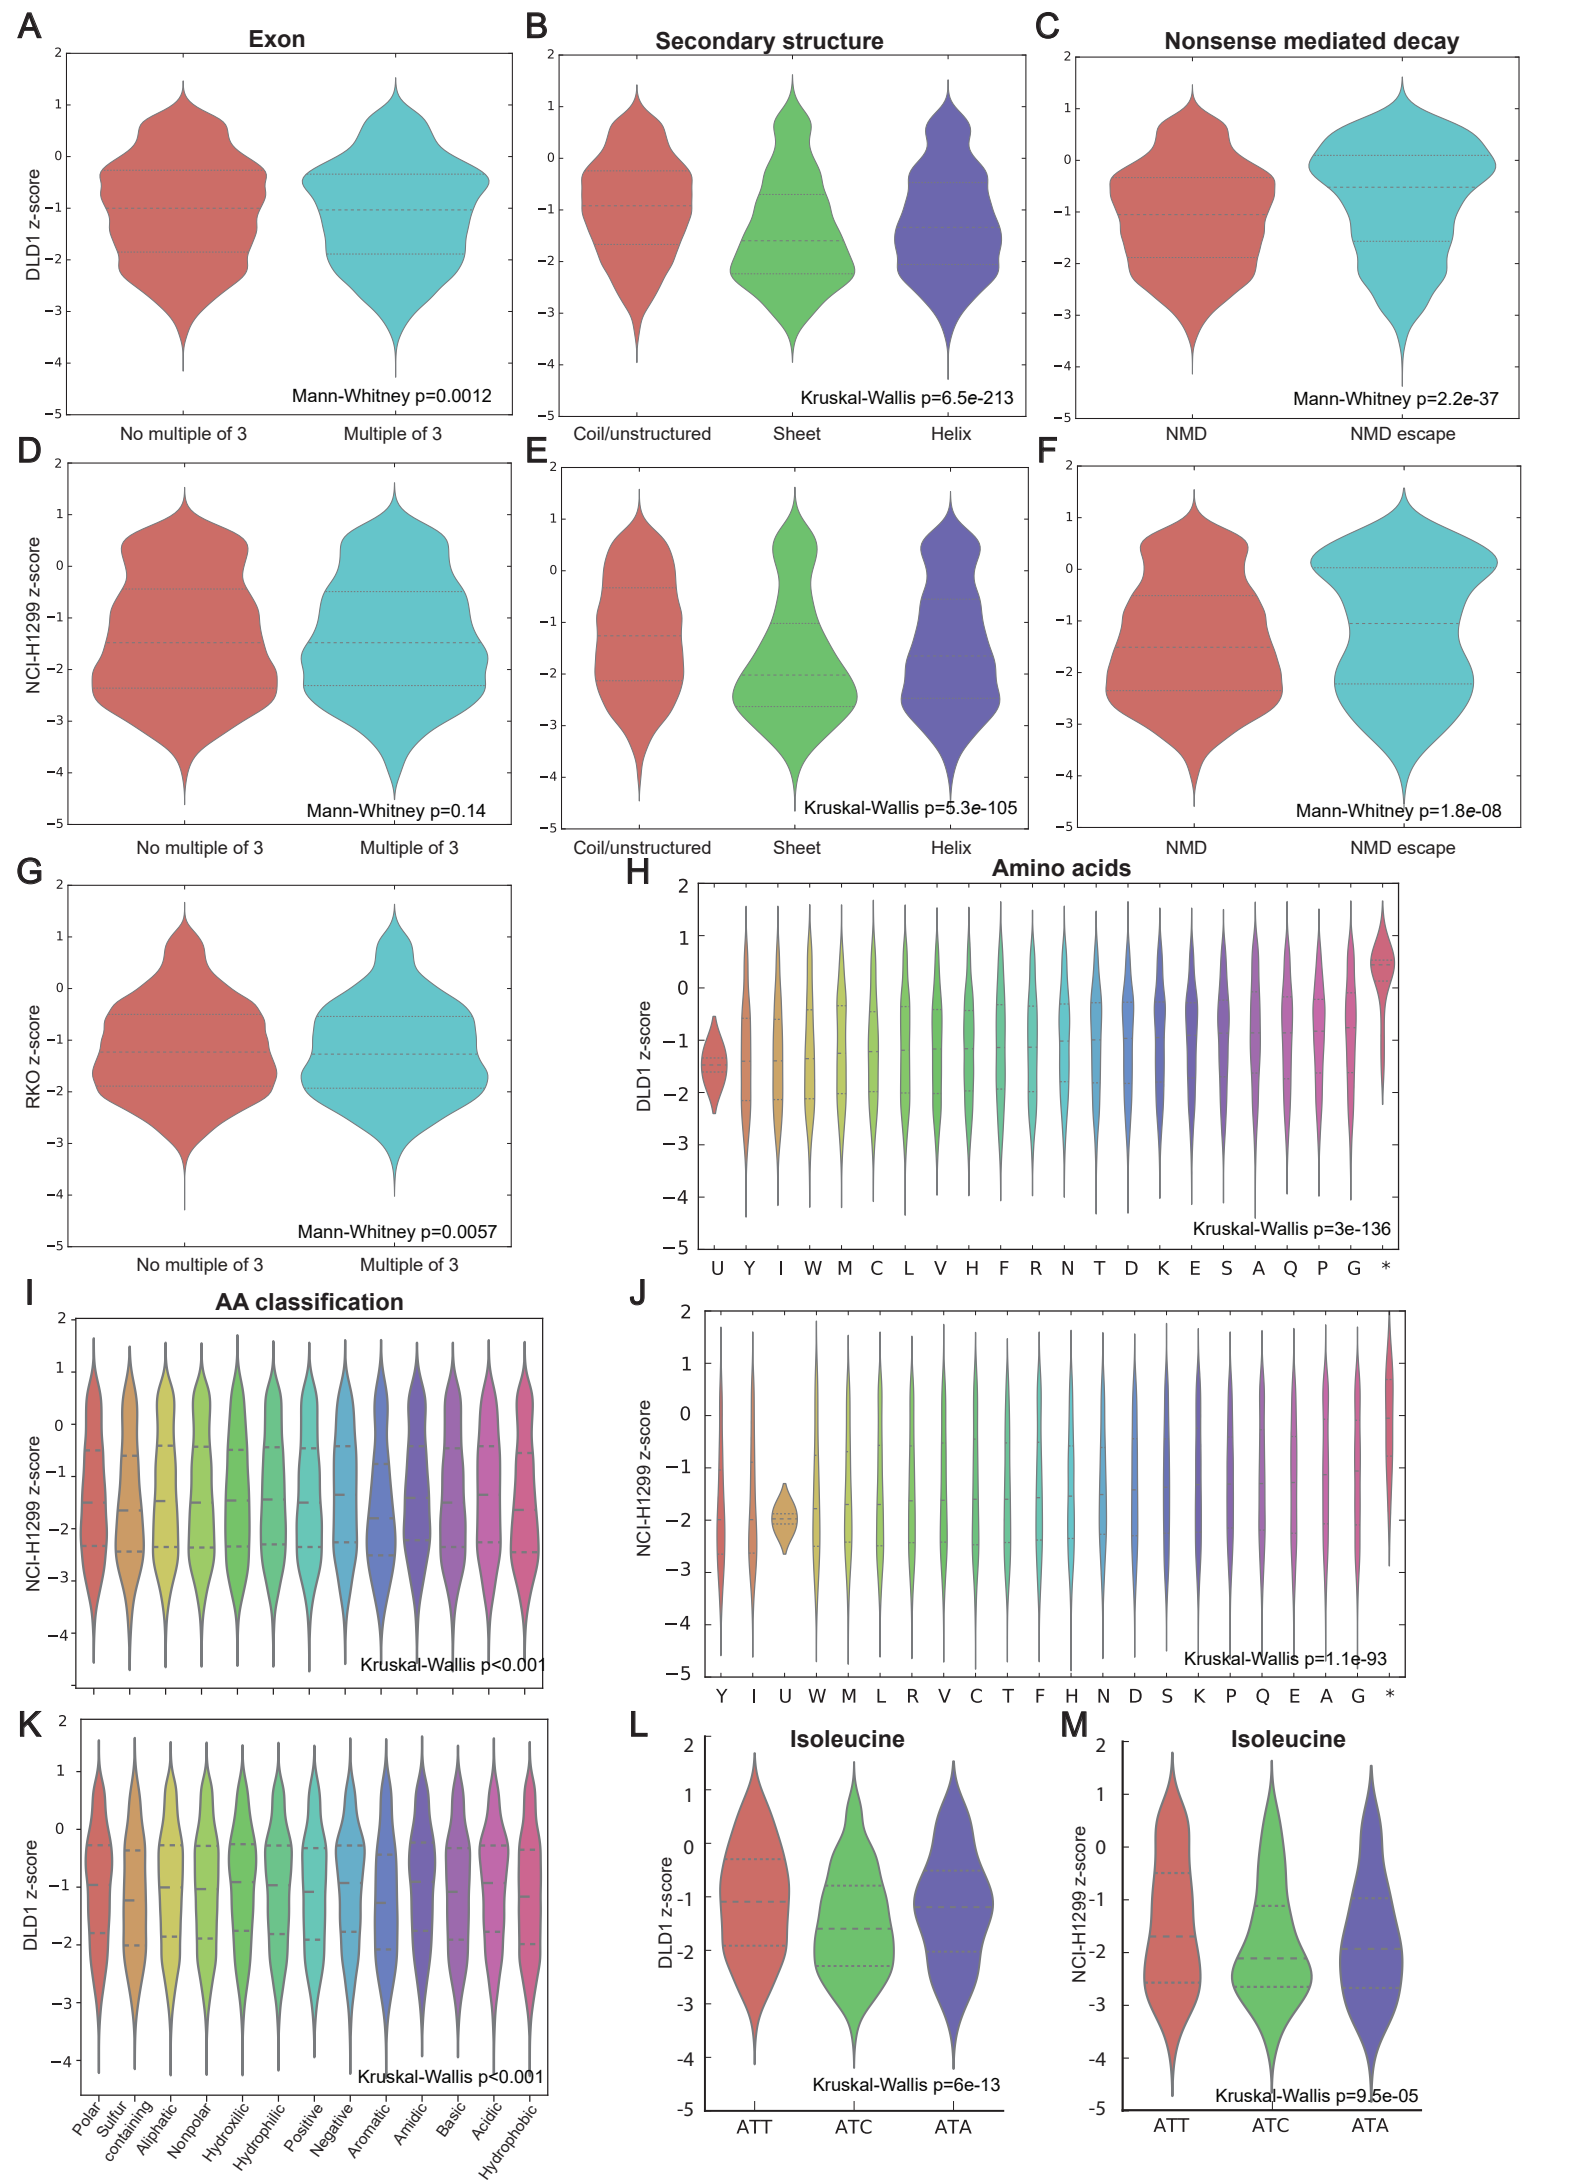

### Figure S3 Correlation of transcript and protein level annotations to functional scores.

**A)** Distribution of DLD1 z-scores for guide RNAs targeting in exons that are a multiple of 3 or not.

**B)** Distribution of DLD1 z-scores for guide RNAs targeting amino acids with different predicted secondary structure:

coil/unstructured, sheet, or helix. **C)** Distribution for RKO z-scores for guide RNAs predicted to trigger or escape NMD. **D)**

Distribution of NCI-H1299 z-scores for guide RNAs targeting in exons that are a multiple of 3 or not. **E)** Distribution of NCI-

H1299 z-scores for guide RNAs targeting amino acids with different predicted secondary structure: coil/unstructured, sheet,

or helix. **F)** Distribution for NCI-H1299 z-scores for guide RNAs predicted to trigger or escape NMD.

**G)** Distribution of RKO z-scores for guide RNAs targeting in exons that are a multiple of 3 or not.

**H)** DLD1 z-score distribution per amino acid. **I)** DLD1 z-score distribution per non-mutually exclusive amino acid class: polar

(S, T, Y, N, Q); nonpolar (G, A, V, C, P, L, I, M, W, F); hydrophobic (A, V, I, L, M, F, Y, W); hydrophilic (S, T, H, N, Q, E, D, K, R);

positively charged (R, H, K); negatively charged (D, E); aliphatic (A, G, I, L, P, V); aromatic (F, W, Y); acidic (D, E); basic (R, H,

K); hydroxilic (S, T); sulfur containing (C, M); and amidic (N, Q). **J)** NCI-H1299 z-score distribution per amino acid. **K)** NCI-

H1299 z-score distribution per amino acid class, similar to **I**. **L)** DLD1 z-score distribution per codon encoding for isoleucine

(I). **M)** NCI-H1299 z-score distribution per codon encoding for isoleucine (I).

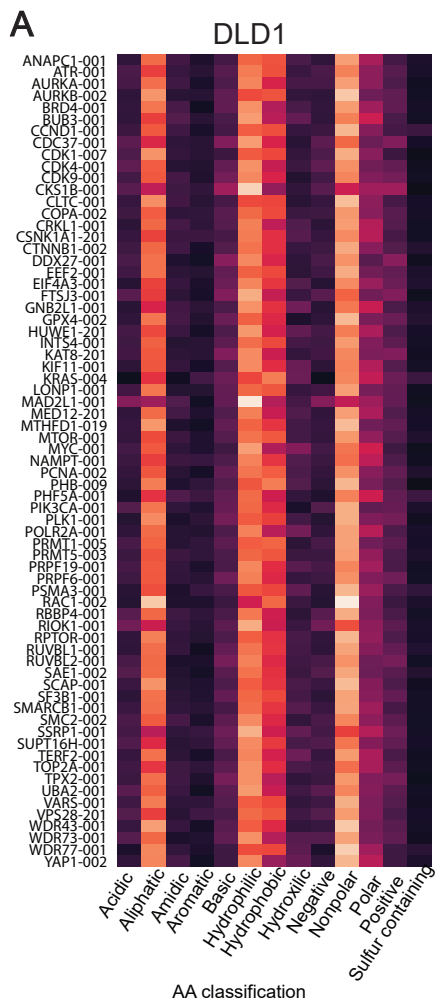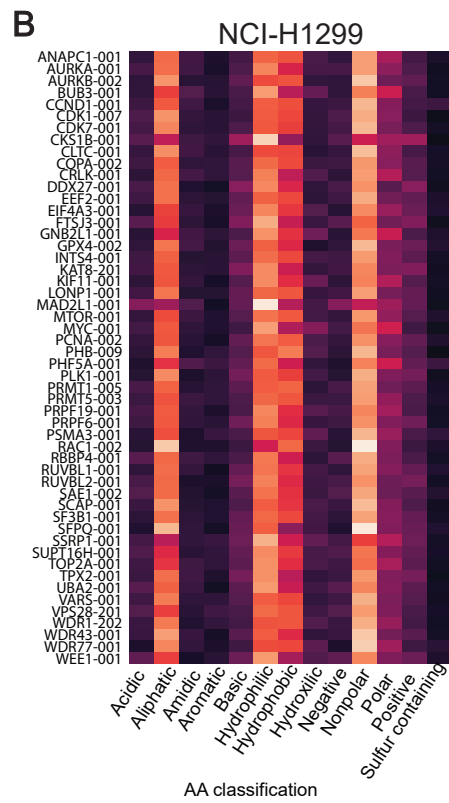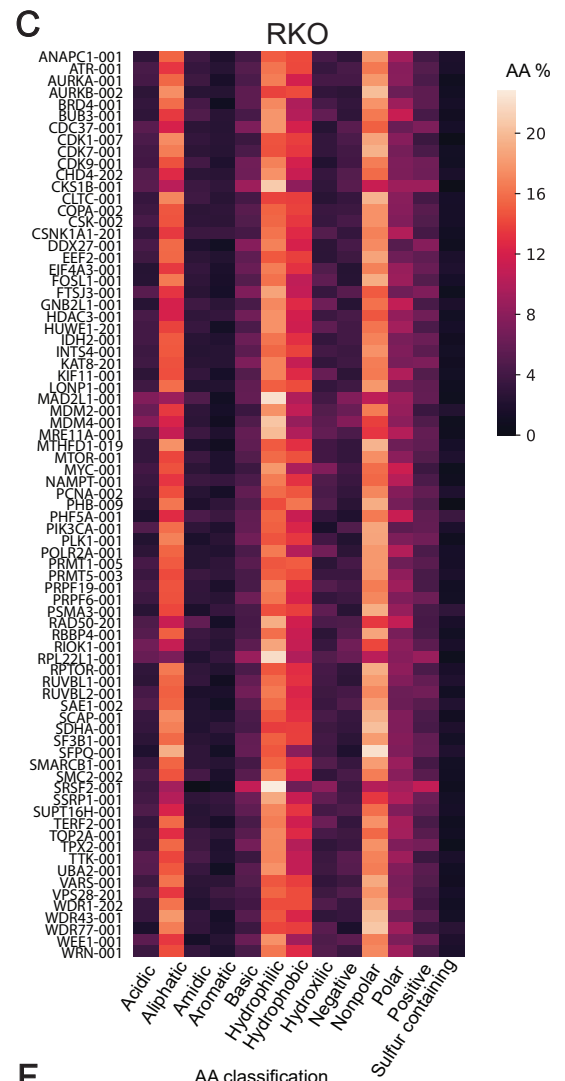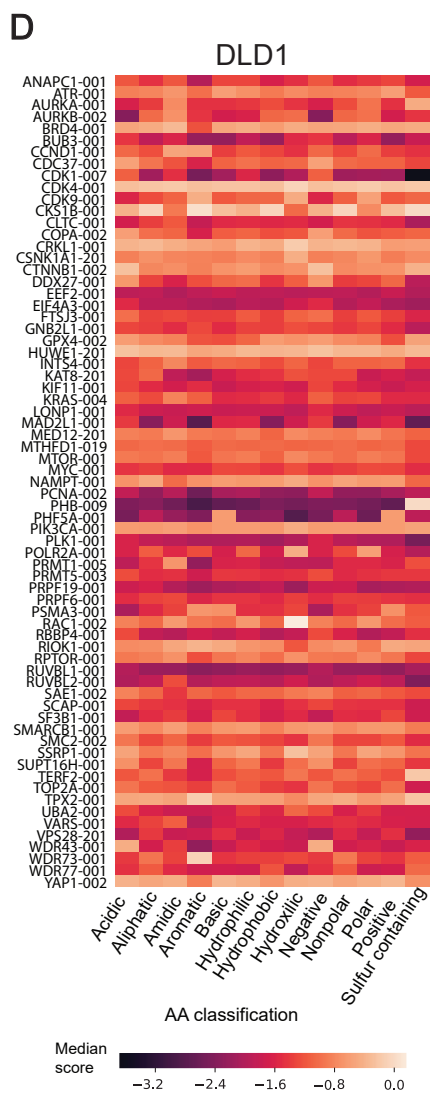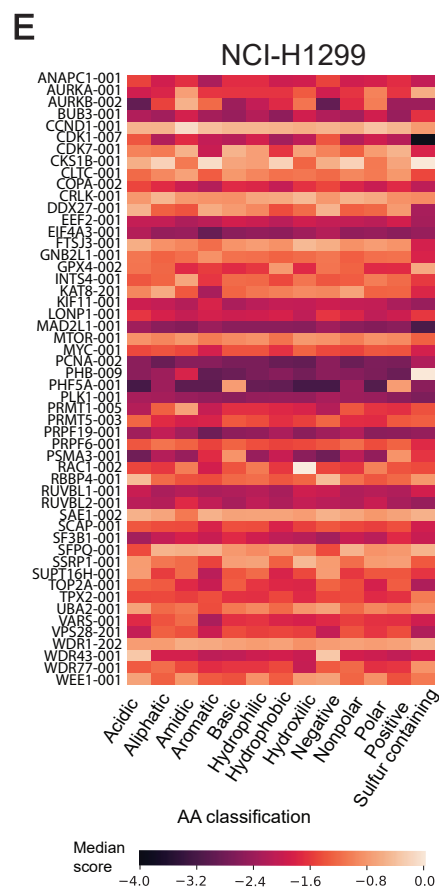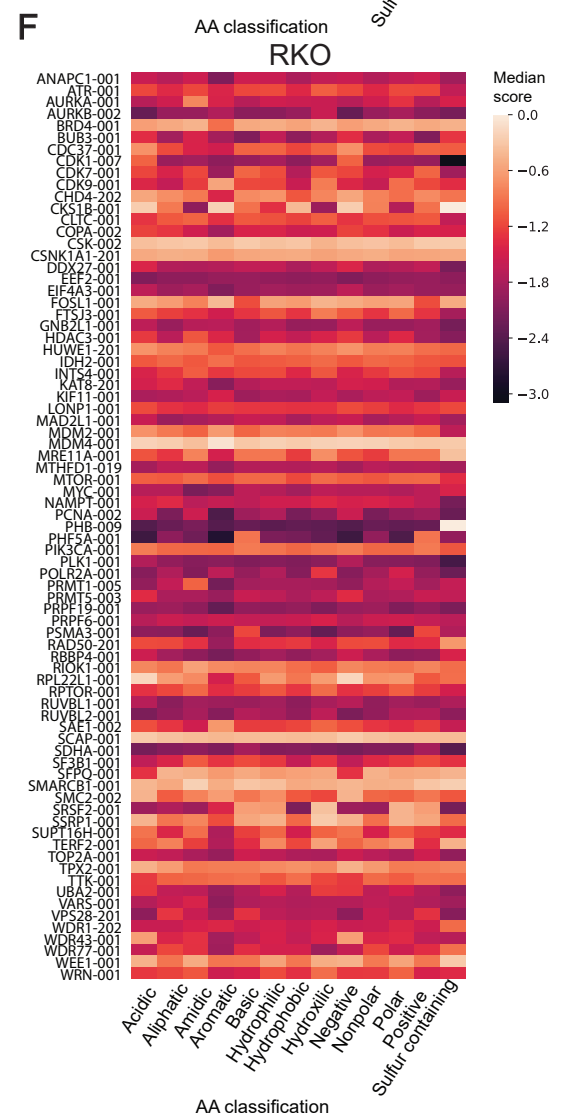

**Figure S4 Correlation of AA class annotation to functional score.**

**A-C** Percentage of amino acids in each amino acid class per transcript (see figure **S3I** for class assignments). **(A)** DLD1 cell line, **(B)** NCI-H1299 cell line, **(C)** RKO cell line. **D-F** Median z-score for each amino acid class per transcript **(D)** DLD1 cell line, **(E)** NCI-H1299 cell line, **(F)** RKO cell line.

**A****Methionine**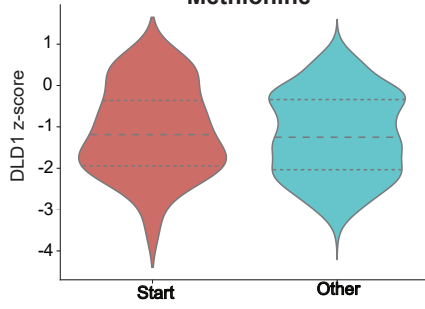

n (start) = 68  
n (other) = 868  
Mann-Whitney p=0.229

**B****Methionine**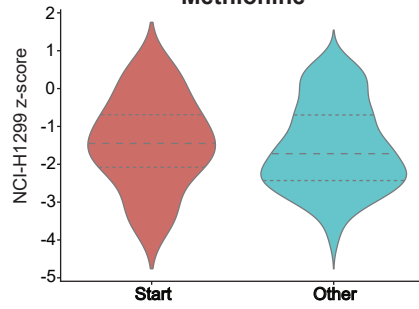

n (start) = 45  
n (other) = 512  
Mann-Whitney p=0.161

**C****Methionine**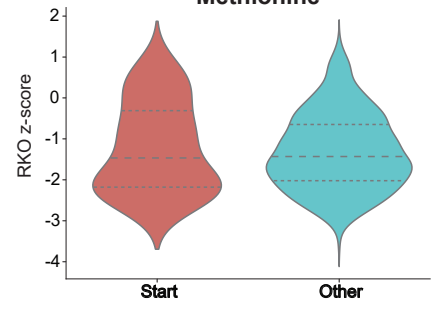

n (start) = 70  
n (other) = 936  
Mann-Whitney p=0.431

**Figure S5 Distribution of z-scores for guide RNAs targeting the amino acid methionine at the start or other position in the protein.**

Results shown for: **A)** DLD1 cell line, **B)** NCI-H1299 cell line, **C)** RKO cell line.



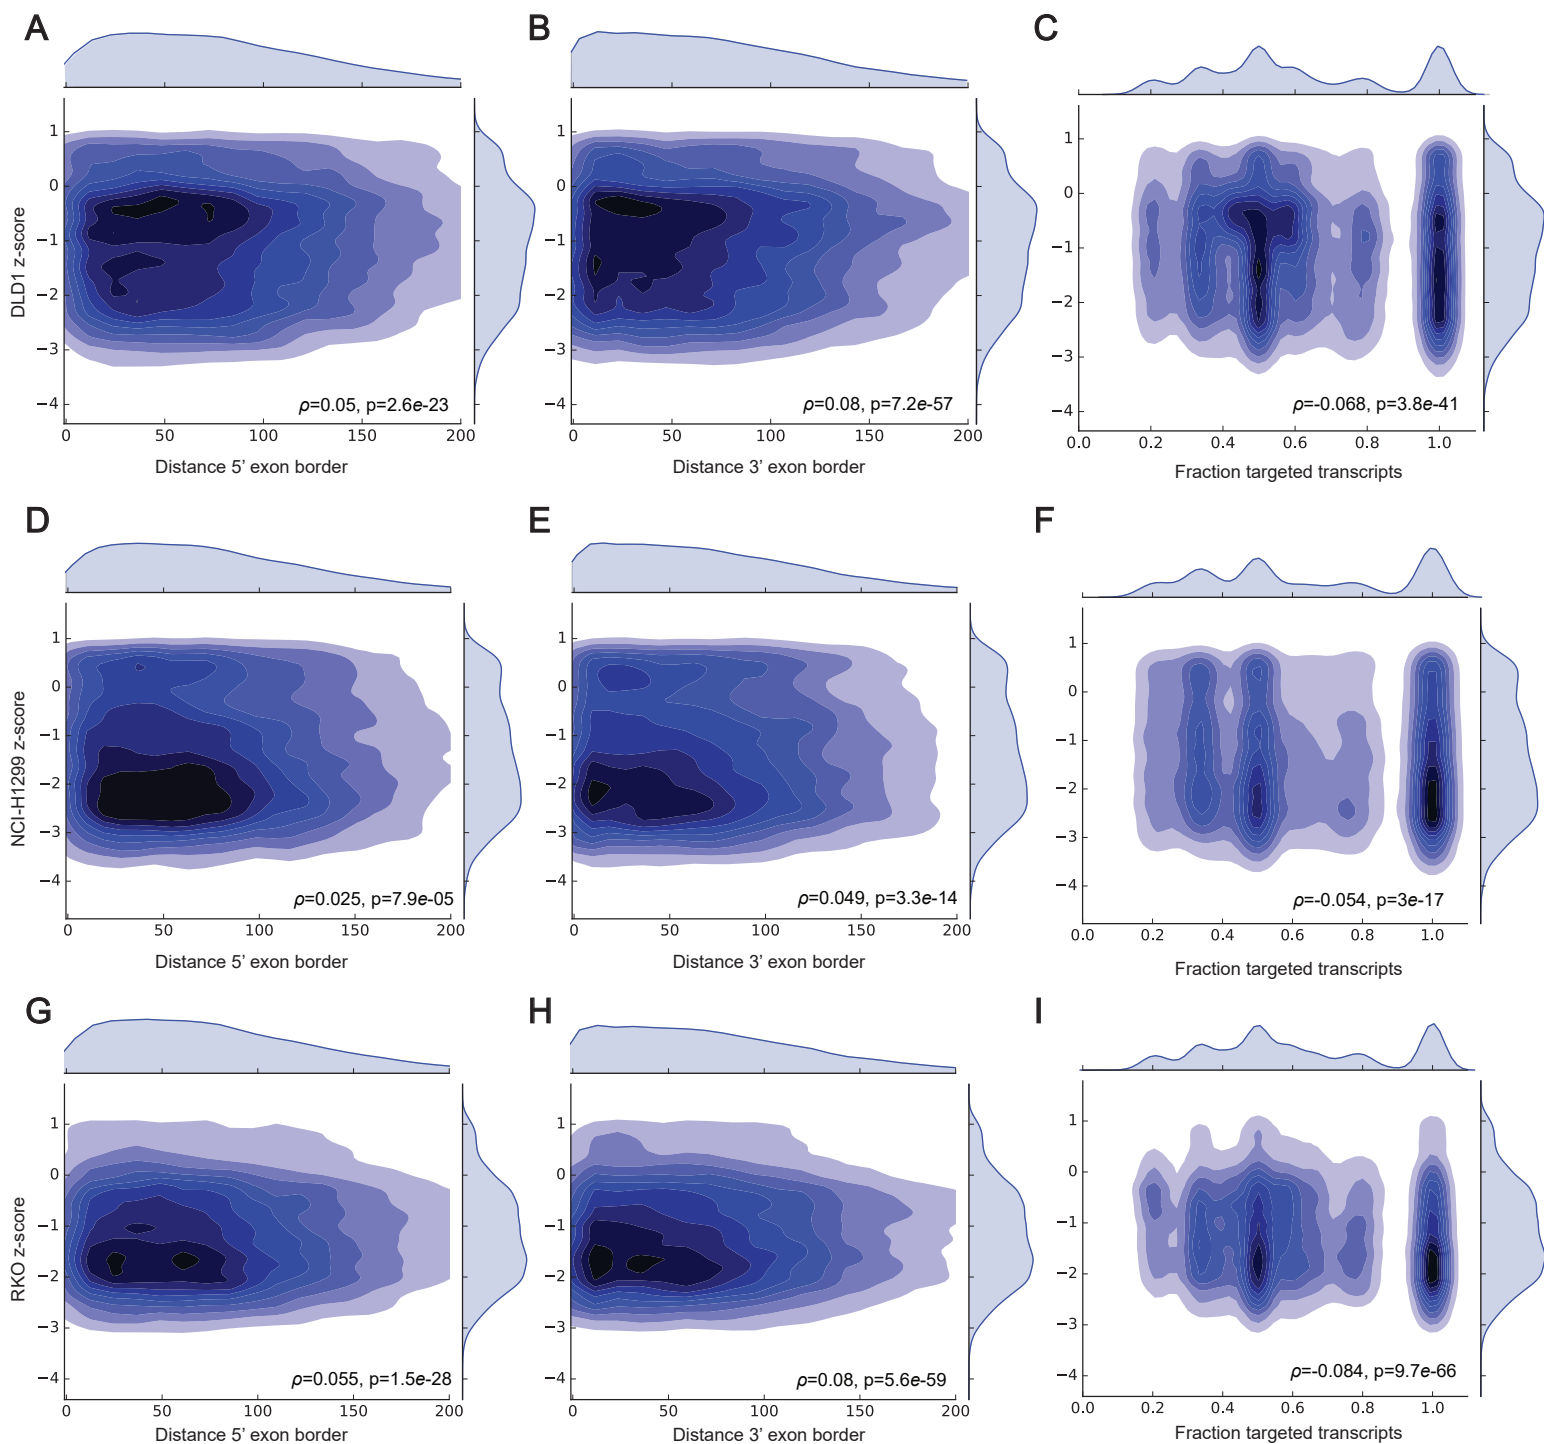

**Figure S6 Correlation of transcript level annotations to functional scores.**

**A)** Density plot showing the relation between DLD1 z-score and the distance of the guide RNA predicted cleavage site to the 5' exon border. **B)** Density plot showing the relation between DLD1 z-score and the distance of the guide RNA predicted cleavage site to the 3' exon border. **C)** Density plot showing the relation between DLD1 z-score and the fraction of targeted transcripts of a gene by a guide RNA. **D)** Density plot showing the relation between NCI-H1299 z-score and the distance of the guide RNA predicted cleavage site to the 5' exon border. **E)** Density plot showing the relation between NCI-H1299 z-score and the distance of the guide RNA predicted cleavage site to the 3' exon border. **F)** Density plot showing the relation between NCI-H1299 z-score and the fraction of targeted transcripts of a gene by a guide RNA. **G)** Density plot showing the relation between RKO z-score and the distance of the guide RNA predicted cleavage site to the 5' exon border. **H)** Density plot showing the relation between RKO z-score and the distance of the guide RNA predicted cleavage site to the 3' exon border. **I)** Density plot showing the relation between RKO z-score and the fraction of targeted transcripts of a gene by a guide RNA.

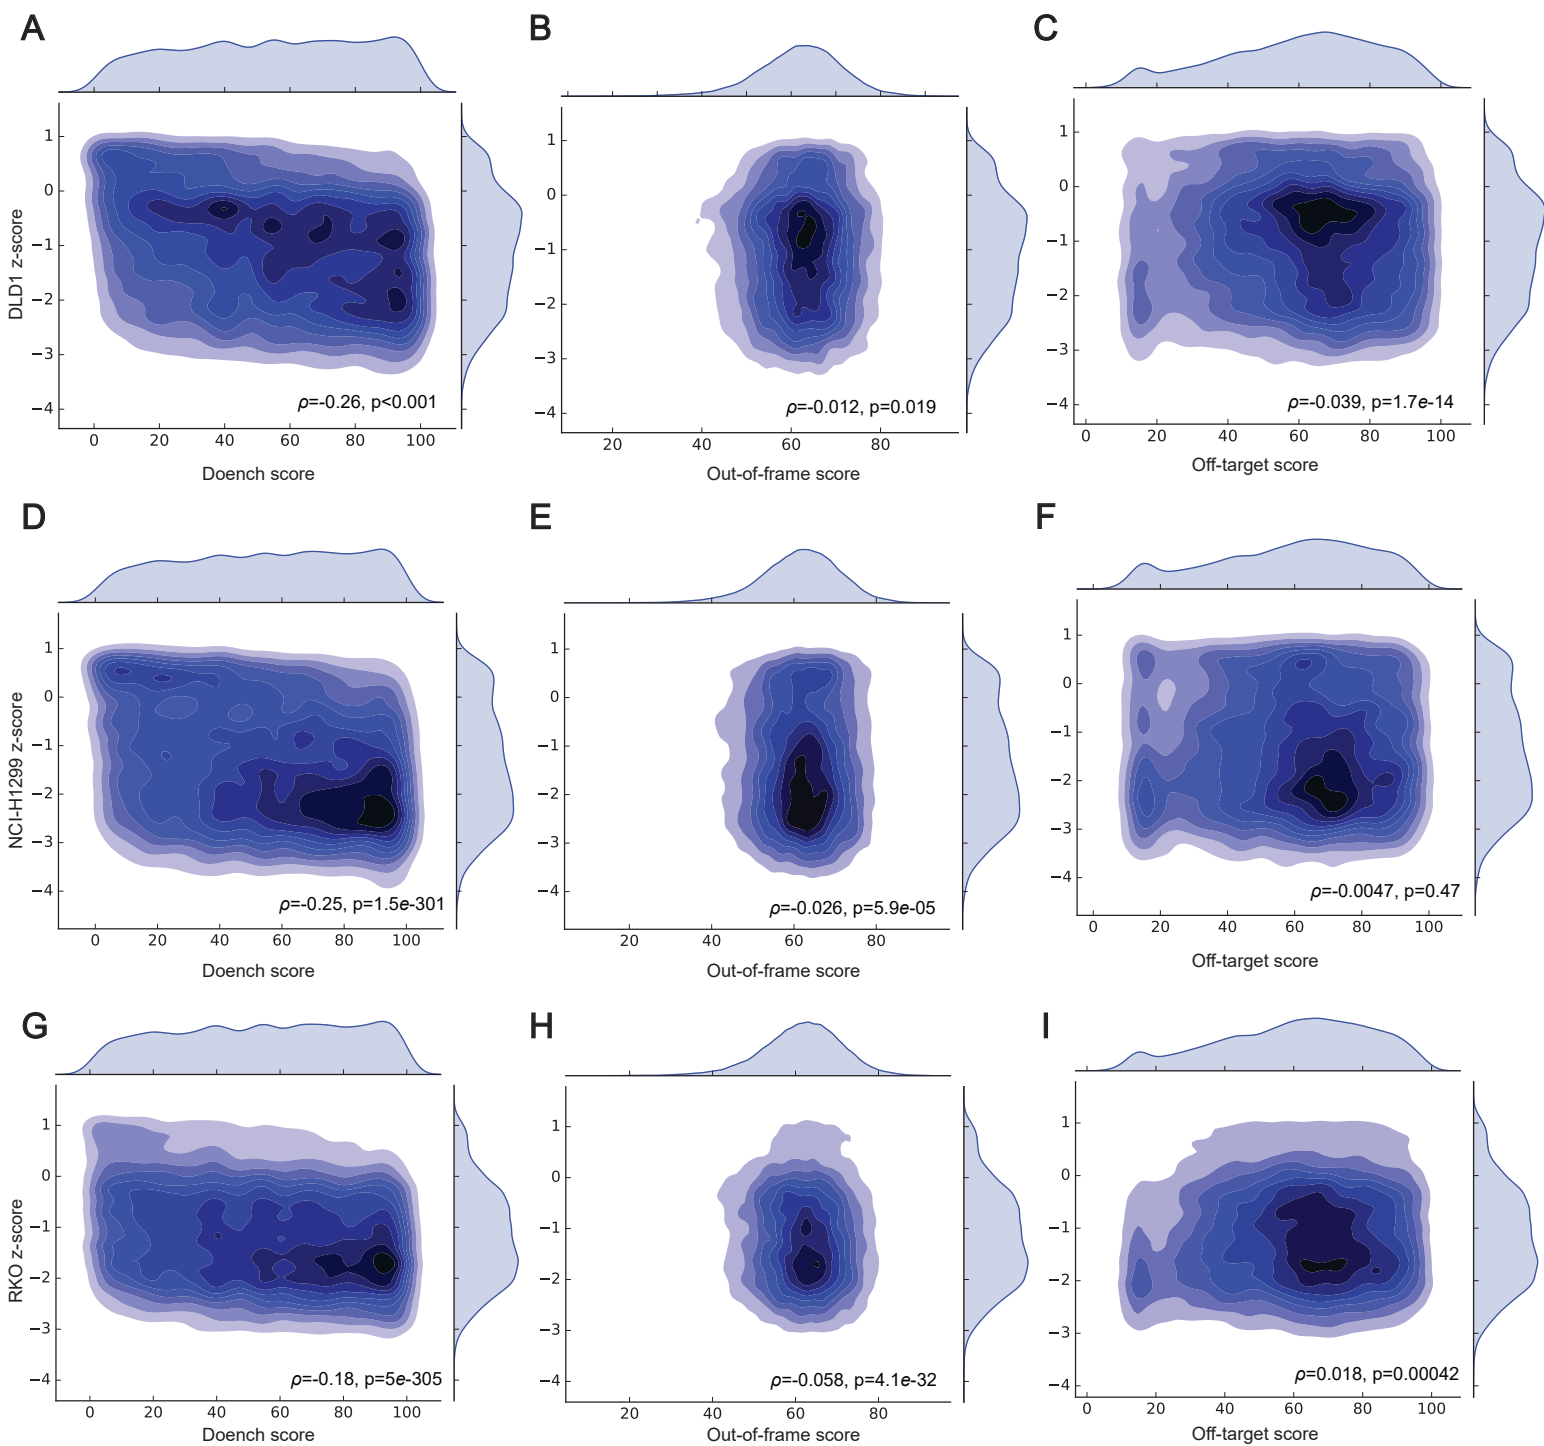

**Figure S7 Correlation of nucleotide level annotations to functional scores.**

**A)** Density plot showing the relation between DLD1 z-score and the Doench score. **B)** Density plot showing the relation between DLD1 z-score and the out-of-frame score. **C)** Density plot showing the relation between DLD1 z-score and the off-target score of a guide RNA. **D)** Density plot showing the relation between NCI-H1299 z-score and the Doench score. **E)** Density plot showing the relation between NCI-H1299 z-score and the out-of-frame score. **F)** Density plot showing the relation between NCI-H1299 z-score and the off-target score of a guide RNA. **G)** Density plot showing the relation between RKO z-score and the Doench score. **H)** Density plot showing the relation between RKO z-score and the out-of-frame score. **I)** Density plot showing the relation between RKO z-score and the off-target score of a guide RNA.

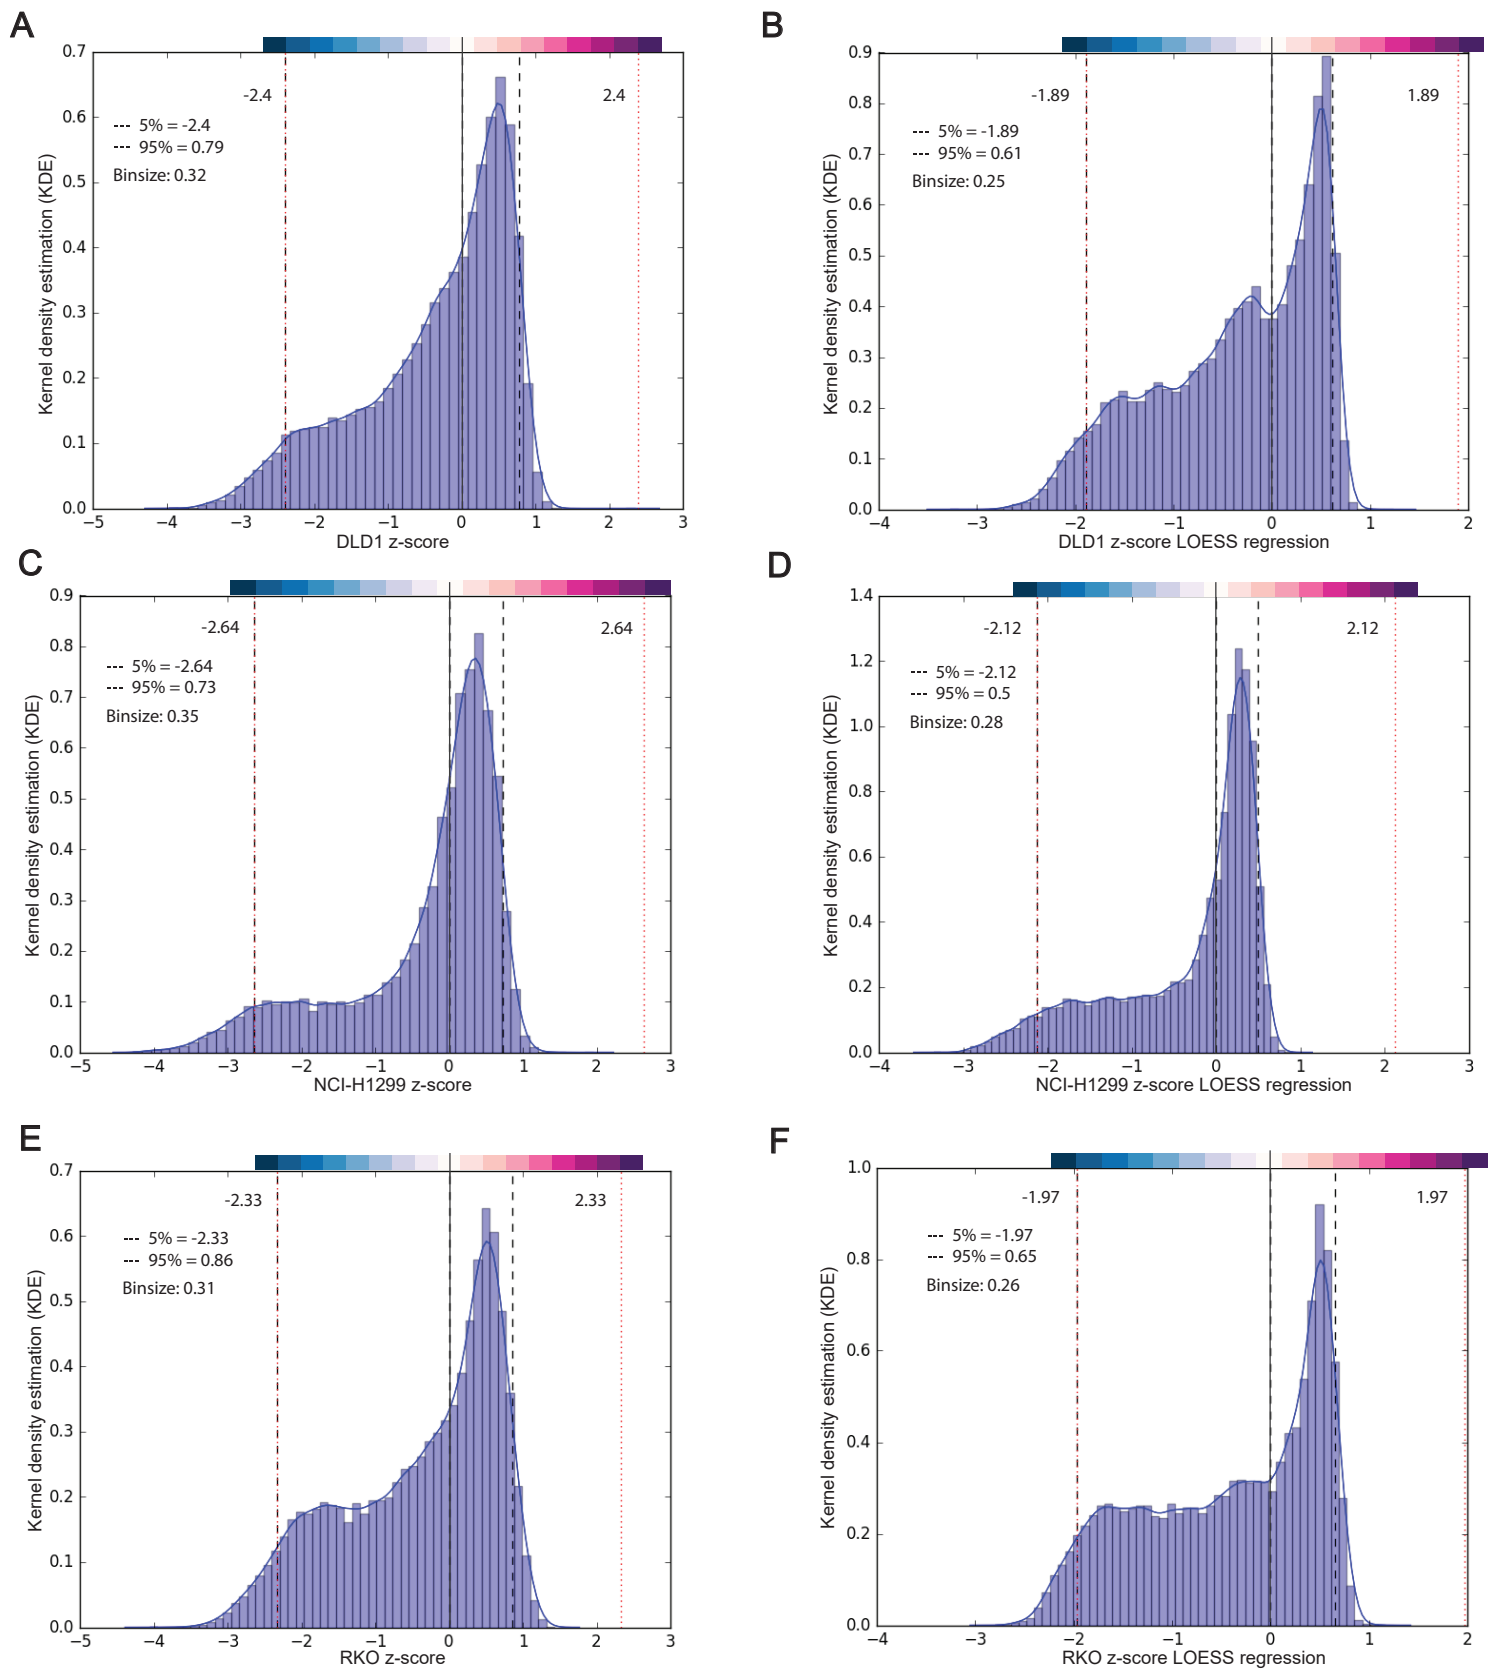

**Figure S8 Score distributions with color legend.**

The CRISPRO color legend used here consists of 17 bins, from blue to dark purple, centered on 0. CRISPRO determines bin size and boundaries for each functional CRISPR score, over all the proteins in the dataset. Either the 5th or 95th percentile (and its inverse) of the score distribution, whichever is farther from 0, is set as the upper and lower border of the outermost bins. Every score lower or higher than this value will fall into those outer bins. Outer bin borders are presented by red dotted line. The rest of the bins are evenly sized between the borders, resulting in a scale centered on 0.

**A)** DLD1 z-score. **B)** DLD1 z-score LOESS regression. **C)** NCI-H1299 z-score. **D)** NCI-H1299 z-score LOESS regression. **E)** RKO z-score. **F)** RKO z-score LOESS regression.

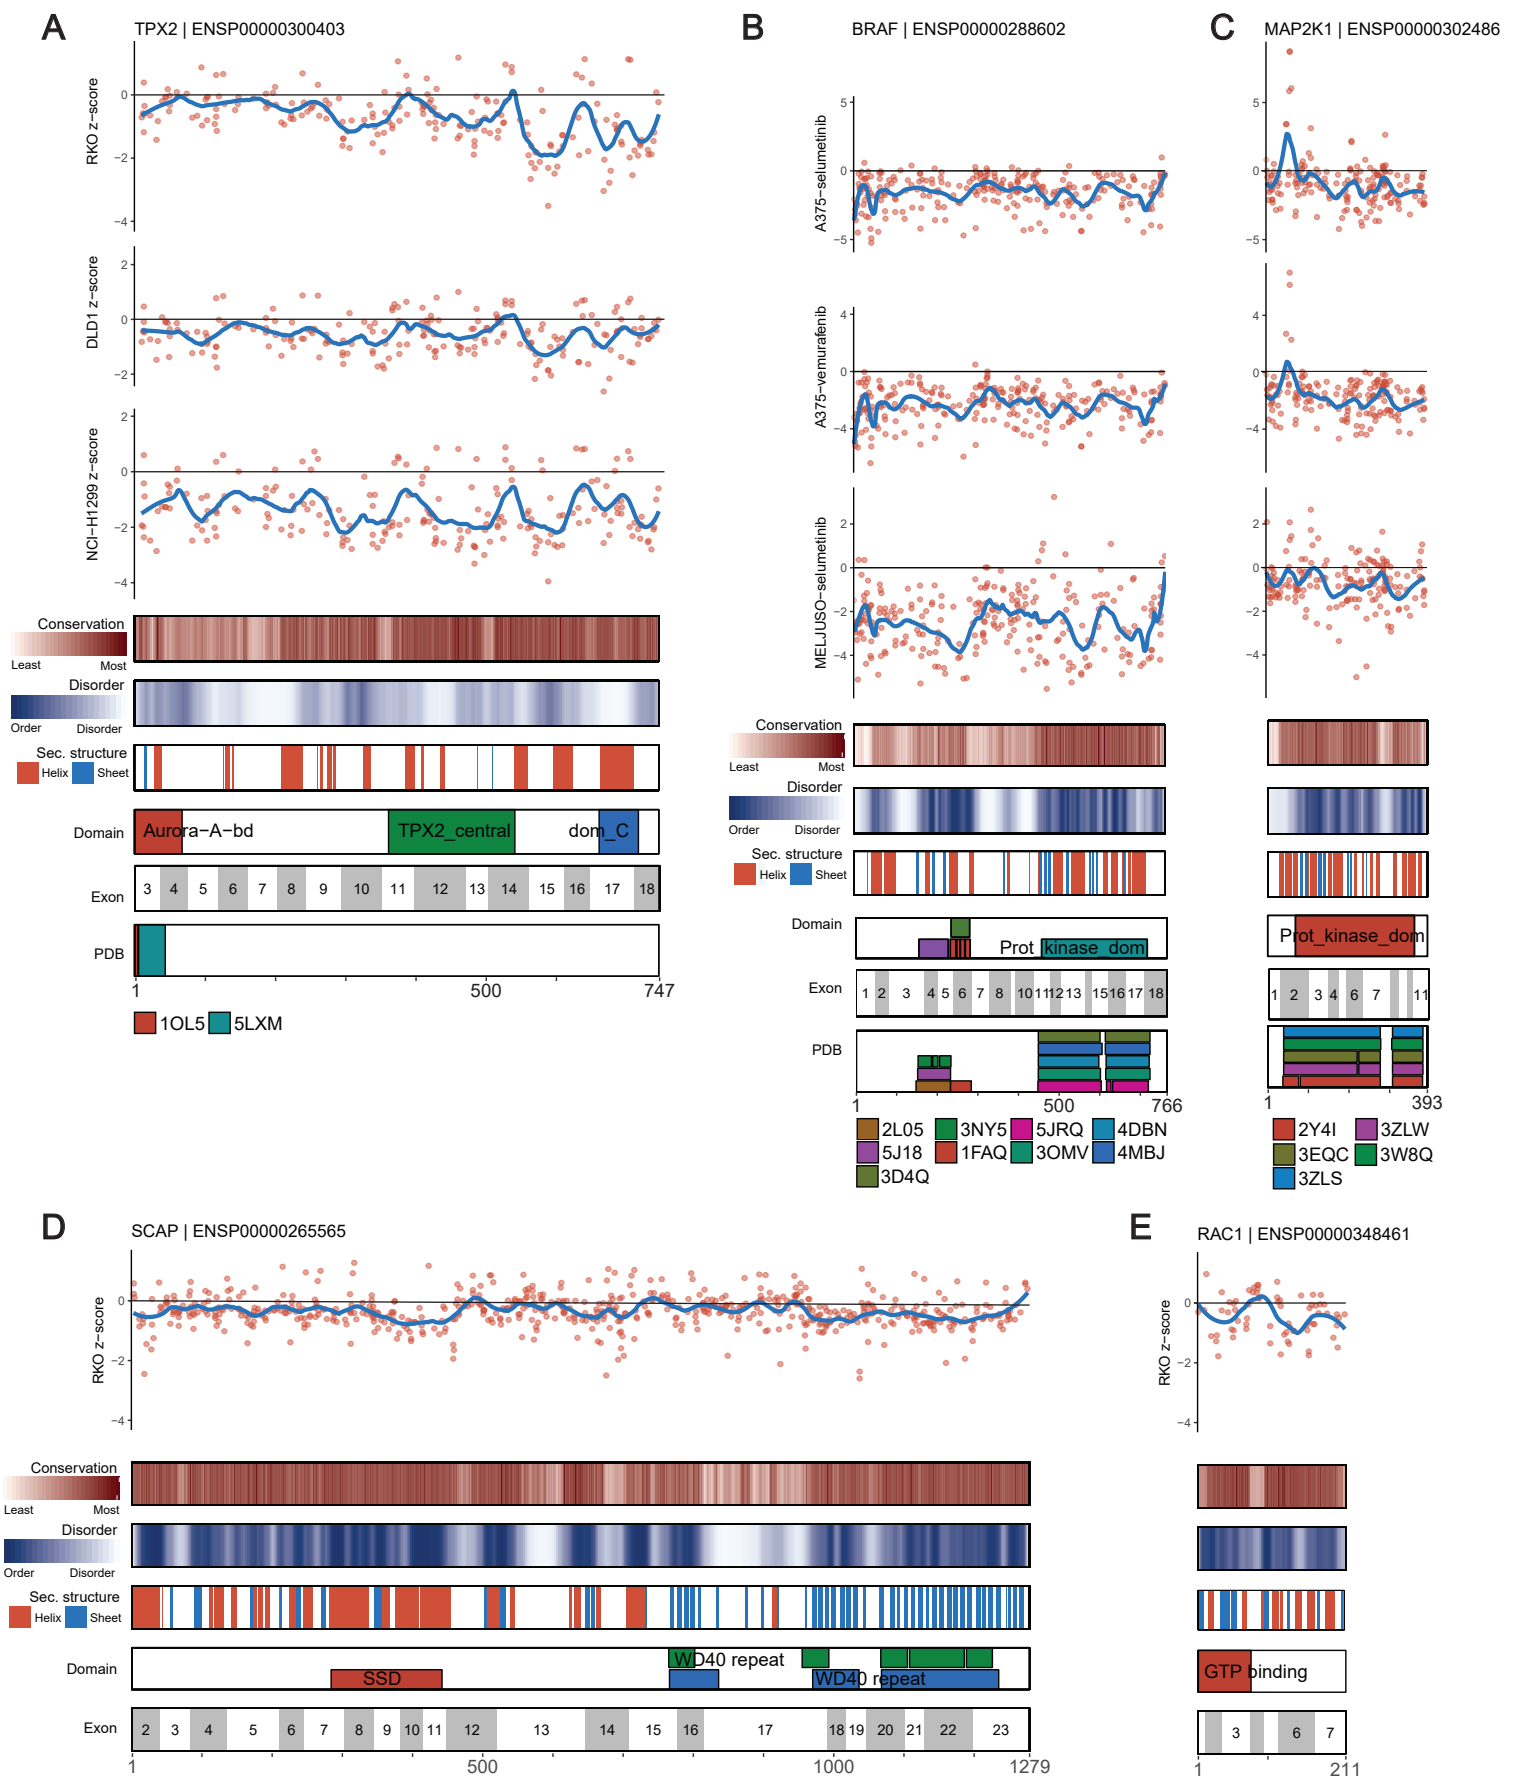

**Figure S9 CRISPRO linear maps.**

**A)** CRISPRO linear map of TPX2. Data from Munoz *et al.* [7] From top to bottom: Graph showing RKO z-scores (each guide RNA with corresponding score, mapped to protein sequence (red dot), and LOESS interpolation (blue line)). DLD1 z-scores. NCI-H1299 z-scores. Predicted conservation scores (PROVEAN). Predicted disorder scores. Predicted secondary structure consensus. Domain annotations (InterPro). Exon annotations. Initial PDB alignments. **B-C)** CRISPRO linear maps from non-genome editing experimental data. Ectopic saturation mutagenesis data from Brenan *et al.* [32] of BRAF (**B**) and MAP2K1 (**C**). From top to bottom: Graph showing A375 with selumetinib scores (each guide RNA with corresponding score, mapped to protein sequence (red dot), and LOESS interpolation (blue line)). A375 with vemurafenib scores. MELJUSO with selumetinib scores. Predicted conservation scores (PROVEAN). Predicted disorder scores. Predicted secondary structure consensus. Domain annotations (InterPro). Exon annotations. Initial PDB alignments. **D-E)** CRISPRO linear maps of genes uniquely called as hits by Munoz *et al.* [7] or CRISPRO (also see Figure S1). SCAP was called as a hit-gene by CRISPRO but not by Munoz *et al.* and RAC1 was called as a hit gene by Munoz *et al.* but not by CRISPRO. From top to bottom: Graph showing RKO z-scores (each guide RNA with corresponding score, mapped to protein sequence (red dot), and LOESS interpolation (blue line)). Predicted conservation scores (PROVEAN). Predicted disorder scores. Predicted secondary structure consensus. Domain annotations (InterPro). Exon annotations.

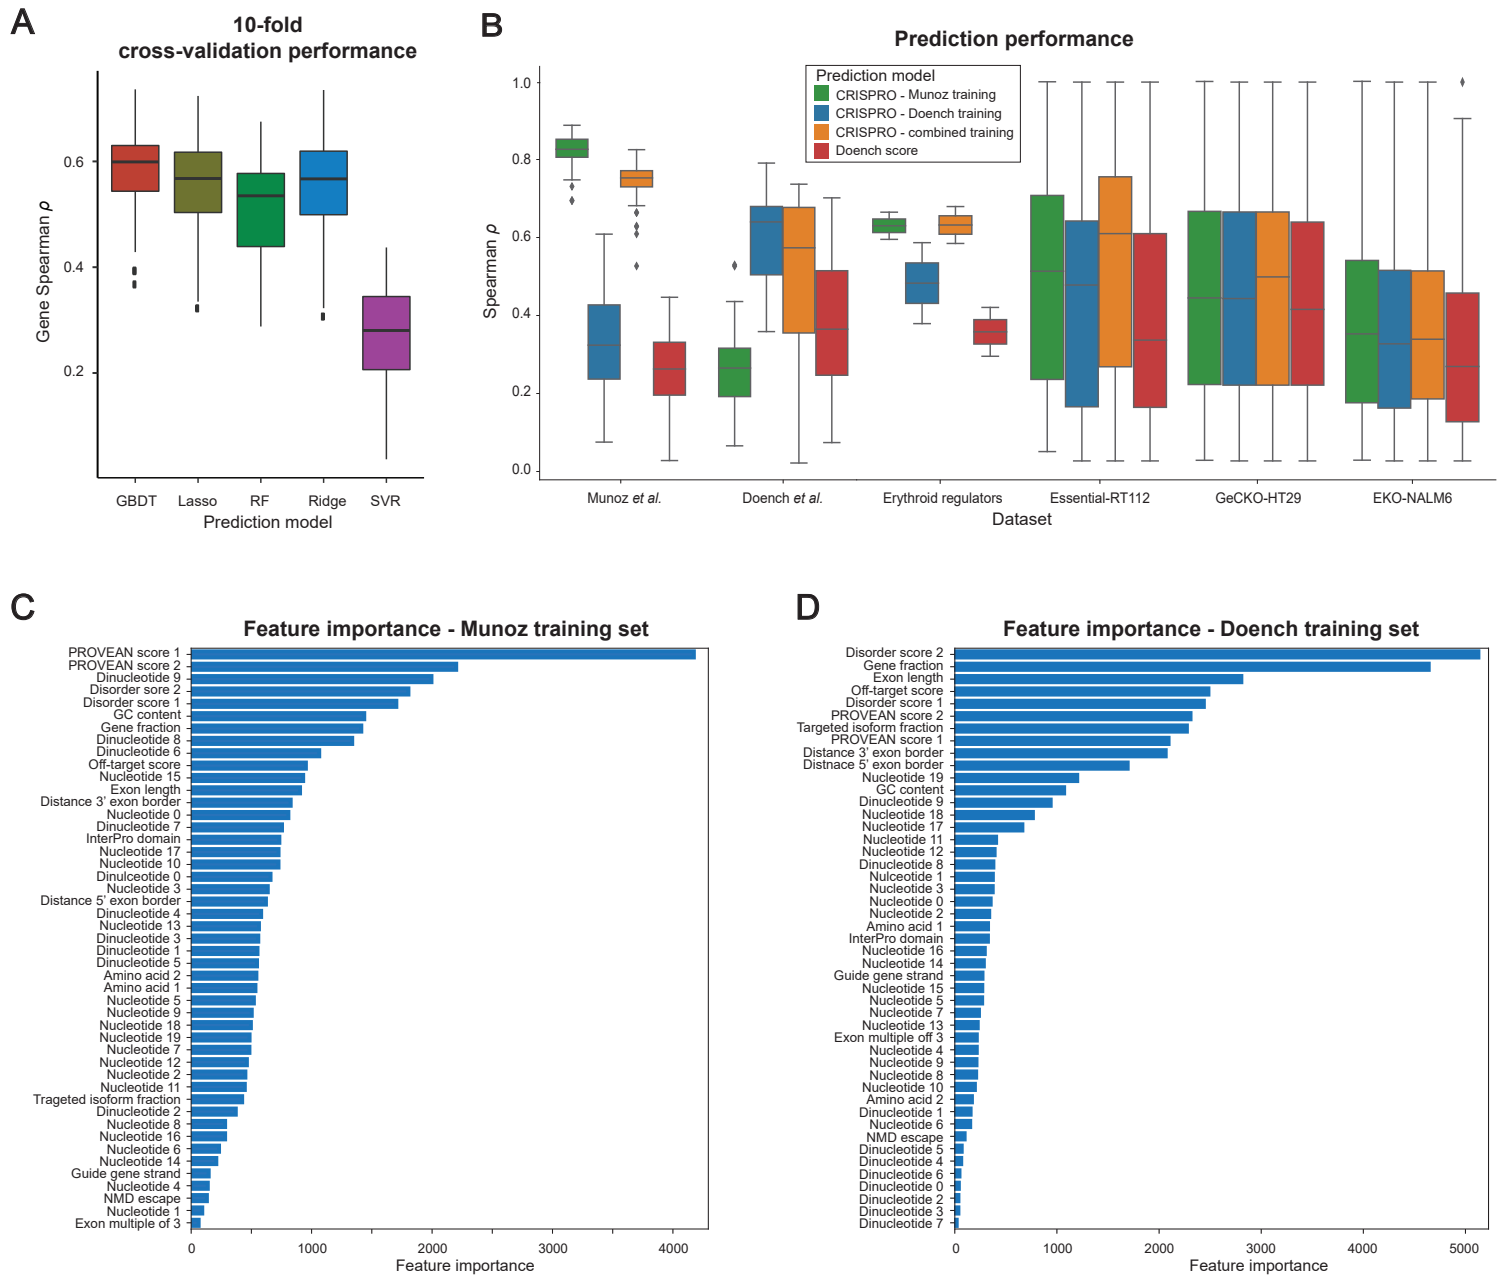

**Figure S10 Prediction of functional CRISPR scores.**

**A)** Spearman correlation of predicted sgRNA scores obtained via 10-fold cross-validation and observed CRISPR sgRNA scores from the Munoz *et al.* dataset for indicated prediction models. **B)** Spearman correlation of predicted and observed CRISPR sgRNA scores from all datasets described in this paper stratified by dataset used to train the model. Combined training indicates the CRISPRO prediction model trained on both the Munoz *et al.* and Doench *et al.* datasets. **C)** Feature importance in GBDT model trained on Munoz *et al.* dataset by information gain when a feature is used to split the Munoz *et al.* training data. Positional nucleotide features are 0-indexed (i.e. nucleotide 0 is in position 1 of the spacer sequence, dinucleotide 0 corresponds to positions 1 and 2 of spacer, where position 20 is PAM proximal). **D)** Feature importance in GBDT model trained on Doench *et al.* dataset by information gain when a feature is used to split the Doench *et al.* training data.

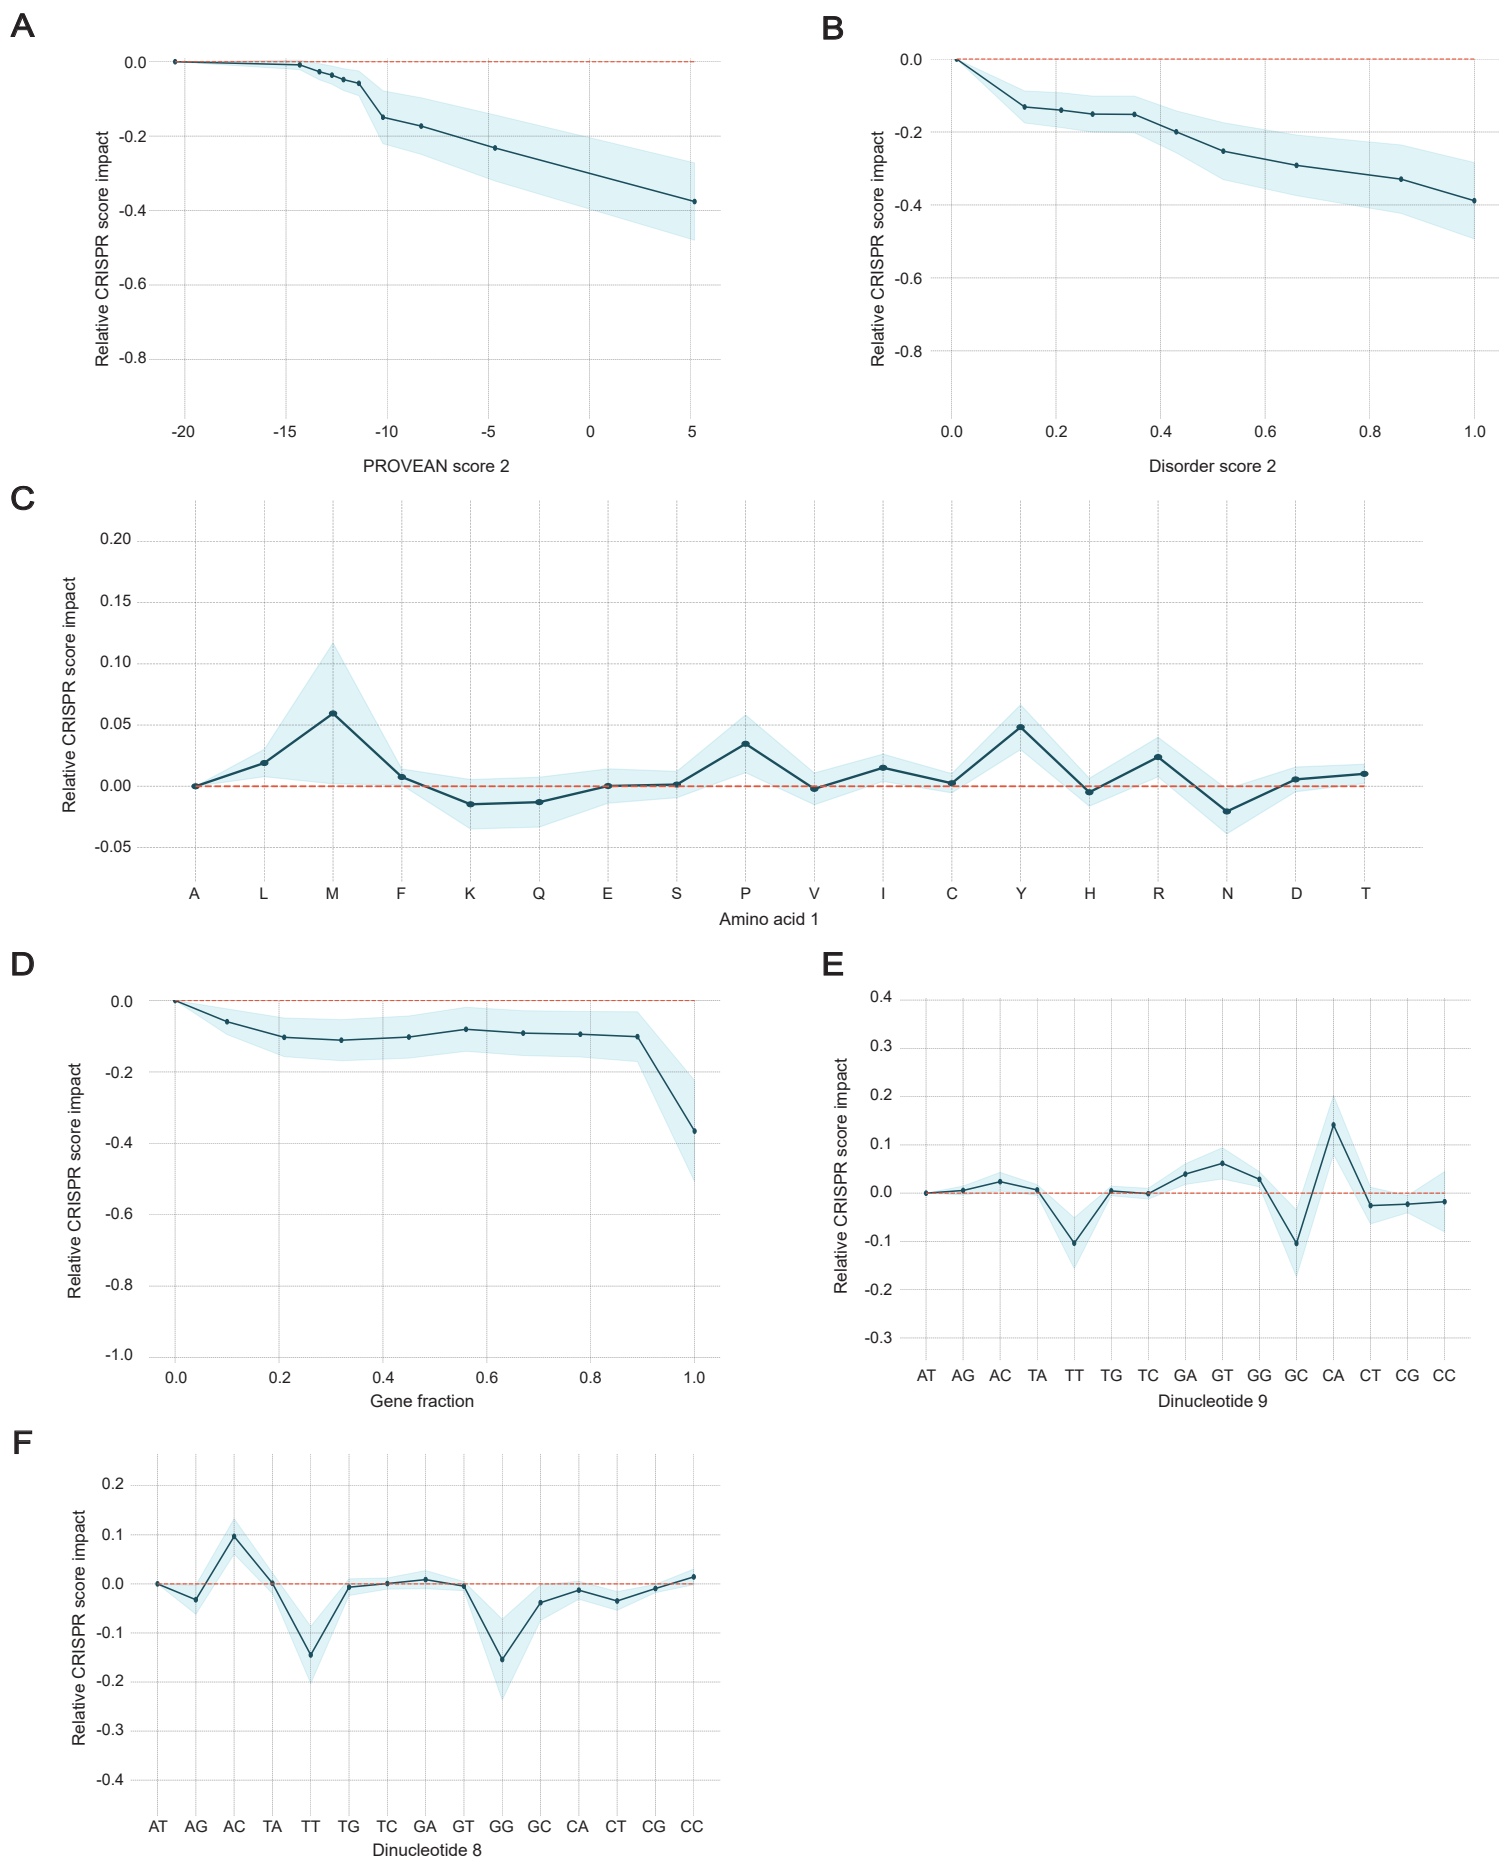

**Figure S11 Partial dependency plot of features in CRISPRO prediction.**

Blue fill shows standard deviation of relative CRISPR score impact for each input score: **A)** PROVEAN score 2; **B)** Disorder score 2; **C)** Amino acid 1; **D)** Gene fraction; **E)** Dinucleotide 9; **F)** Dinucleotide 8. Higher relative CRISPR score impact can be interpreted as higher loss of function capability. For amino acid 1, relative CRISPR score impact is not shown for amino acids G and W are not shown due to one hot encoding and recursive feature elimination. For dinucleotides, AA is not shown in the model due to one hot encoding and recursive feature elimination.

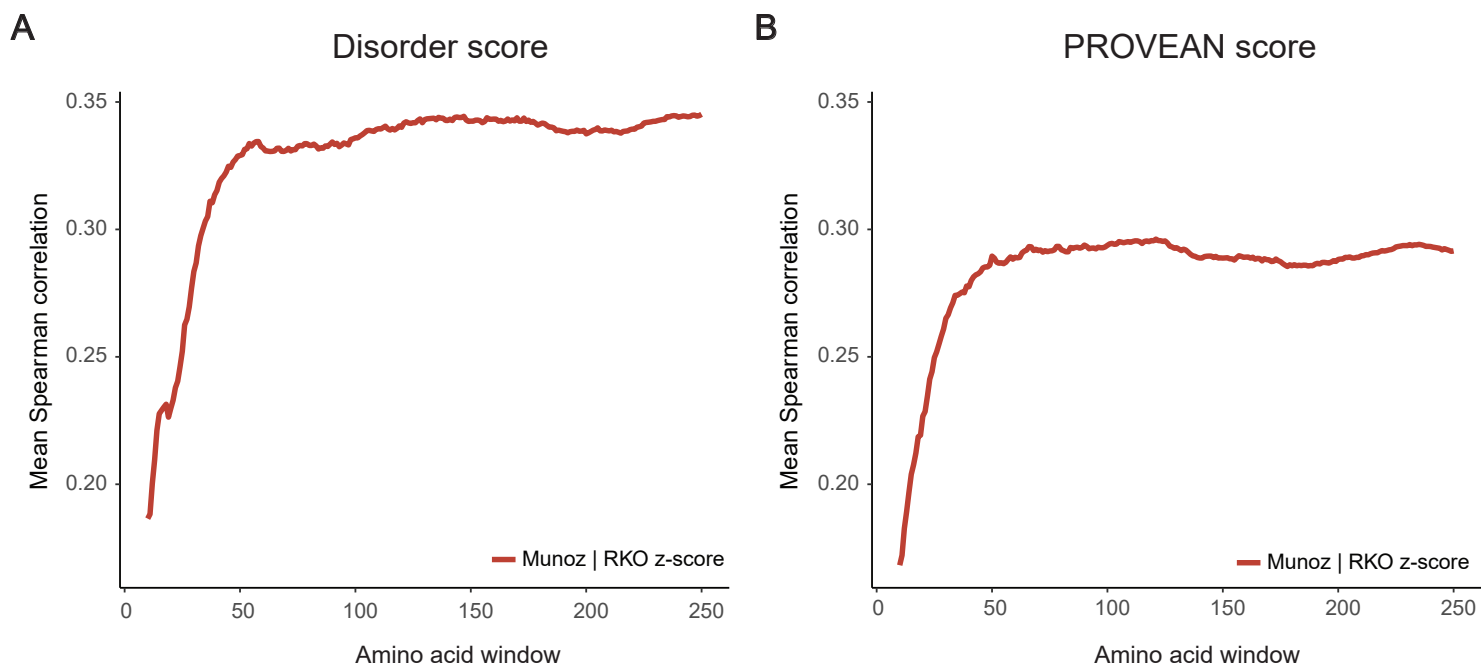

**Figure S12 LOESS regression span parameter.**

**A)** Correlation of LOESS regression CRISPR scores and corresponding positional disorder scores as a function of the span parameter in LOESS regression. Span parameter defined as amino acid window / protein length (AA/L). **B)** Correlation of LOESS regression CRISPR scores and corresponding positional PROVEAN scores a function of the span parameter in LOESS regression.
