# Supplementary material for: CRISPRO: identification of functional protein coding sequences based on genome editing dense mutagenesis
Source: Genome Biol. 2018 Oct 19;19:169. doi: 10.1186/s13059-018-1563-5 (PMC6195731; doi:10.1186/s13059-018-1563-5)
Supplement: Supplementary file 3 — Table S2, Annotated CRISPRO output (XLSX 33034 kb) [file 13059_2018_1563_MOESM3_ESM.xlsx]

## Sheet: Munoz et al.
ensembl_gene_id	ensembl_transcript_id	ensembl_peptide_id	gene_name	transcript_name	APPRIS	position	AA	codon	guide	chrom	DSB_Coordinate	strand	offtarget_score	doench_score	oof_score	gene_fraction	Exon	Exon_Length	distance_5_exon_border	distance_3_exon_border	Exon_Multiple_of_3	escapeNMD	num_transcripts	targeted_transcripts	targeted_transcripts_frac	provean_score	disorder_score	Interpro_Description	SecStruct	PDB_id	PDB_description	control	RKO Z-score	RKO Z-score_LOESS	DLD1 Z-score	DLD1 Z-score_LOESS	NCI-H1299 Z-score	NCI-H1299 Z-score_LOESS
ENSG00000103653	ENST00000439220	ENSP00000414764	CSK	CSK-002	PRINCIPAL:1	1	M	ATG								0.00221729	3	14			FALSE		7			-1.527	0.838874					Library
ENSG00000103653	ENST00000439220	ENSP00000414764	CSK	CSK-002	PRINCIPAL:1	2	S	TCA								0.00443459	3	14			FALSE		7			-2.467	0.790917					Library
ENSG00000103653	ENST00000439220	ENSP00000414764	CSK	CSK-002	PRINCIPAL:1	3	A	GCA	TGAGAAGATGTCAGCAATAC	chr15	75090648	+	65	27	48	0.00665188	3	14	9	5	FALSE	FALSE	7	6	0.857143	-2.284	0.757472					Library	0.06	0.178836	0.0824096	0.321911	0.4	0.566661
ENSG00000103653	ENST00000439220	ENSP00000414764	CSK	CSK-002	PRINCIPAL:1	4	I	ATA	TGAGAAGATGTCAGCAATAC	chr15	75090648	+	65	27	48	0.00886918	3	14	9	5	FALSE	FALSE	7	6	0.857143	-1.905	0.699507					Library	0.06	0.173593	0.0824096	0.338175	0.4	0.574156
ENSG00000103653	ENST00000439220	ENSP00000414764	CSK	CSK-002	PRINCIPAL:1	5	Q	CAG	CACCTGCCTTGCAGGCCGCC	chr15	75090958	+	49	21	63	0.0110865	3	14	2	111	FALSE	FALSE	7	6	0.857143	-4.179	0.634131					Library	1.06	0.168533	0.699884	0.353956	0.79	0.581371
ENSG00000103653	ENST00000439220	ENSP00000414764	CSK	CSK-002	PRINCIPAL:1	6	A	GCC	CACCTGCCTTGCAGGCCGCC	chr15	75090958	+	49	21	63	0.0133038	4	113	2	111	FALSE	FALSE	7	6	0.857143	-2.652	0.513319					Library	1.06	0.16365	0.699884	0.369257	0.79	0.588309
ENSG00000103653	ENST00000439220	ENSP00000414764	CSK	CSK-002	PRINCIPAL:1	7	A	GCC	TTCTGTACCGGATGGCCAGG	chr15	75090962	-	84	89	57	0.0155211	4	113	6	107	FALSE	FALSE	7	6	0.857143	-2.652	0.411668					Library	-0.1	0.158936	0.256587	0.384077	0.39	0.594973
ENSG00000103653	ENST00000439220	ENSP00000414764	CSK	CSK-002	PRINCIPAL:1	8	W	TGG	TTGCAGGCCGCCTGGCCATC	chr15	75090966	+	70	13	58	0.0177384	4	113	10	103	FALSE	FALSE	7	6	0.857143	-11.179	0.326186					Library	-0.3	0.154378	0.467019	0.398413	0.66	0.601363
ENSG00000103653	ENST00000439220	ENSP00000414764	CSK	CSK-002	PRINCIPAL:1	8	W	TGG	TTCTGTACCGGATGGCCAGG	chr15	75090962	-	84	89	57	0.0177384	4	113	6	107	FALSE	FALSE	7	6	0.857143	-11.179	0.326186					Library	-0.1	0.154378	0.256587	0.398413	0.39	0.601363
ENSG00000103653	ENST00000439220	ENSP00000414764	CSK	CSK-002	PRINCIPAL:1	8	W	TGG	ACATTCTGTACCGGATGGCC	chr15	75090965	-	87	40	60	0.0177384	4	113	9	104	FALSE	FALSE	7	6	0.857143	-11.179	0.326186					Library	0.87	0.154378	0.911118	0.398413	0.67	0.601363
ENSG00000103653	ENST00000439220	ENSP00000414764	CSK	CSK-002	PRINCIPAL:1	9	P	CCA	TTGCAGGCCGCCTGGCCATC	chr15	75090966	+	70	13	58	0.0199557	4	113	10	103	FALSE	FALSE	7	6	0.857143	-9.15	0.245996	SH3_domain				Library	-0.3	0.149965	0.467019	0.412265	0.66	0.607481
ENSG00000103653	ENST00000439220	ENSP00000414764	CSK	CSK-002	PRINCIPAL:1	9	P	CCA	ACATTCTGTACCGGATGGCC	chr15	75090965	-	87	40	60	0.0199557	4	113	9	104	FALSE	FALSE	7	6	0.857143	-9.15	0.245996	SH3_domain				Library	0.87	0.149965	0.911118	0.412265	0.67	0.607481
ENSG00000103653	ENST00000439220	ENSP00000414764	CSK	CSK-002	PRINCIPAL:1	9	P	CCA	GCAATACATTCTGTACCGGA	chr15	75090970	-	94	91	57	0.0199557	4	113	14	99	FALSE	FALSE	7	6	0.857143	-9.15	0.245996	SH3_domain				Library	-0.05	0.149965	0.244748	0.412265	0.57	0.607481
ENSG00000103653	ENST00000439220	ENSP00000414764	CSK	CSK-002	PRINCIPAL:1	10	S	TCC	GCAATACATTCTGTACCGGA	chr15	75090970	-	94	91	57	0.0221729	4	113	14	99	FALSE	FALSE	7	6	0.857143	-5.661	0.221655	SH3_domain				Library	-0.05	0.145687	0.244748	0.425631	0.57	0.613329
ENSG00000103653	ENST00000439220	ENSP00000414764	CSK	CSK-002	PRINCIPAL:1	11	G	GGT	CTTGGCAATACATTCTGTAC	chr15	75090974	-	74	66	56	0.0243902	4	113	18	95	FALSE	FALSE	7	6	0.857143	-9.516	0.218115	SH3_domain				Library	-0.3	0.141533	0.0585211	0.438507	0.45	0.618909
ENSG00000103653	ENST00000439220	ENSP00000414764	CSK	CSK-002	PRINCIPAL:1	12	T	ACA	CTTGGCAATACATTCTGTAC	chr15	75090974	-	74	66	56	0.0266075	4	113	18	95	FALSE	FALSE	7	6	0.857143	-11.014	0.193659	SH3_domain				Library	-0.3	0.137492	0.0585211	0.450891	0.45	0.624222
ENSG00000103653	ENST00000439220	ENSP00000414764	CSK	CSK-002	PRINCIPAL:1	13	E	GAA								0.0288248	4	113			FALSE		7			-11.169	0.177828	SH3_domain				Library		0.133556		0.46278		0.629271
ENSG00000103653	ENST00000439220	ENSP00000414764	CSK	CSK-002	PRINCIPAL:1	14	C	TGT								0.0310421	4	113			FALSE		7			-13.382	0.195434	SH3_domain				Library		0.129715		0.474174		0.634059
ENSG00000103653	ENST00000439220	ENSP00000414764	CSK	CSK-002	PRINCIPAL:1	15	I	ATT								0.0332594	4	113			FALSE		7			-10.741	0.19865	SH3_domain				Library		0.125961		0.485073		0.638586
ENSG00000103653	ENST00000439220	ENSP00000414764	CSK	CSK-002	PRINCIPAL:1	16	A	GCC								0.0354767	4	113			FALSE		7			-10.804	0.207334	SH3_domain				Library		0.122288		0.495474		0.642856
ENSG00000103653	ENST00000439220	ENSP00000414764	CSK	CSK-002	PRINCIPAL:1	17	K	AAG	AGTGCCGTGGAAGTTGTACT	chr15	75090992	-	91	72	72	0.037694	4	113	36	77	FALSE	FALSE	7	6	0.857143	-10.203	0.22416	SH3_domain				Library	0.23	0.118686	0.556619	0.505378	0.79	0.64687
ENSG00000103653	ENST00000439220	ENSP00000414764	CSK	CSK-002	PRINCIPAL:1	18	Y	TAC	AGTGCCGTGGAAGTTGTACT	chr15	75090992	-	91	72	72	0.0399113	4	113	36	77	FALSE	FALSE	7	6	0.857143	-11.392	0.234217	SH3_domain				Library	0.23	0.115148	0.556619	0.514784	0.79	0.650631
ENSG00000103653	ENST00000439220	ENSP00000414764	CSK	CSK-002	PRINCIPAL:1	19	N	AAC	ATTGCCAAGTACAACTTCCA	chr15	75090999	+	59	95	58	0.0421286	4	113	43	70	FALSE	FALSE	7	6	0.857143	-9.917	0.207825	SH3_domain				Library	0.18	0.111666	0.320913	0.523691	1.19	0.654139
ENSG00000103653	ENST00000439220	ENSP00000414764	CSK	CSK-002	PRINCIPAL:1	20	F	TTC	ATTGCCAAGTACAACTTCCA	chr15	75090999	+	59	95	58	0.0443459	4	113	43	70	FALSE	FALSE	7	6	0.857143	-10.109	0.206616	SH3_domain				Library	0.18	0.108232	0.320913	0.532099	1.19	0.657396
ENSG00000103653	ENST00000439220	ENSP00000414764	CSK	CSK-002	PRINCIPAL:1	21	H	CAC	GGTCCTGCTCGGCAGTGCCG	chr15	75091005	-	83	56	58	0.0465632	4	113	49	64	FALSE	FALSE	7	6	0.857143	-8.394	0.228697	SH3_domain				Library	-0.06	0.104838	0.855076	0.540008	0.83	0.660401
ENSG00000103653	ENST00000439220	ENSP00000414764	CSK	CSK-002	PRINCIPAL:1	22	G	GGC	GGTCCTGCTCGGCAGTGCCG	chr15	75091005	-	83	56	58	0.0487805	4	113	49	64	FALSE	FALSE	7	6	0.857143	-10.511	0.237551	SH3_domain				Library	-0.06	0.101477	0.855076	0.547417	0.83	0.663153
ENSG00000103653	ENST00000439220	ENSP00000414764	CSK	CSK-002	PRINCIPAL:1	23	T	ACT								0.0509978	4	113			FALSE		7			-8.875	0.25901	SH3_domain				Library		0.0981418		0.554328		0.66565
ENSG00000103653	ENST00000439220	ENSP00000414764	CSK	CSK-002	PRINCIPAL:1	24	A	GCC	CTTCCACGGCACTGCCGAGC	chr15	75091013	+	85	30	53	0.0532151	4	113	57	56	FALSE	FALSE	7	6	0.857143	-8.111	0.311622	SH3_domain				Library	-0.04	0.0948246	0.498676	0.560738	0.34	0.667887
ENSG00000103653	ENST00000439220	ENSP00000414764	CSK	CSK-002	PRINCIPAL:1	25	E	GAG	CTTCCACGGCACTGCCGAGC	chr15	75091013	+	85	30	53	0.0554324	4	113	57	56	FALSE	FALSE	7	6	0.857143	-8.437	0.330853	SH3_domain				Library	-0.04	0.0915197	0.498676	0.566648	0.34	0.669863
ENSG00000103653	ENST00000439220	ENSP00000414764	CSK	CSK-002	PRINCIPAL:1	25	E	GAG	GCAGAAGGGCAGGTCCTGCT	chr15	75091016	-	53	72	65	0.0554324	4	113	60	53	FALSE	FALSE	7	6	0.857143	-8.437	0.330853	SH3_domain				Library	-0.39	0.0915197	0.429323	0.566648	0.75	0.669863
ENSG00000103653	ENST00000439220	ENSP00000414764	CSK	CSK-002	PRINCIPAL:1	26	Q	CAG	GCAGAAGGGCAGGTCCTGCT	chr15	75091016	-	53	72	65	0.0576497	4	113	60	53	FALSE	FALSE	7	6	0.857143	-8.032	0.329291	SH3_domain				Library	-0.39	0.0882216	0.429323	0.572057	0.75	0.671572
ENSG00000103653	ENST00000439220	ENSP00000414764	CSK	CSK-002	PRINCIPAL:1	27	D	GAC								0.059867	4	113			FALSE		7			-10.395	0.315234	SH3_domain				Library		0.0849266		0.576966		0.673012
ENSG00000103653	ENST00000439220	ENSP00000414764	CSK	CSK-002	PRINCIPAL:1	28	L	CTG	CGTCTCCTTTGCAGAAGGGC	chr15	75091026	-	46	53	66	0.0620843	4	113	70	43	FALSE	FALSE	7	6	0.857143	-11.34	0.286416	SH3_domain				Library	-0.22	0.0816329	0.56793	0.581375	0.58	0.674179
ENSG00000103653	ENST00000439220	ENSP00000414764	CSK	CSK-002	PRINCIPAL:1	29	P	CCC	CGTCTCCTTTGCAGAAGGGC	chr15	75091026	-	46	53	66	0.0643016	4	113	70	43	FALSE	FALSE	7	6	0.857143	-11.927	0.2352	SH3_domain				Library	-0.22	0.0783401	0.56793	0.585284	0.58	0.675067
ENSG00000103653	ENST00000439220	ENSP00000414764	CSK	CSK-002	PRINCIPAL:1	29	P	CCC	AGCACGTCTCCTTTGCAGAA	chr15	75091030	-	63	84	61	0.0643016	4	113	74	39	FALSE	FALSE	7	6	0.857143	-11.927	0.2352	SH3_domain				Library	-0.13	0.0783401	0.511985	0.585284	0.3	0.675067
ENSG00000103653	ENST00000439220	ENSP00000414764	CSK	CSK-002	PRINCIPAL:1	30	F	TTC	CAGGACCTGCCCTTCTGCAA	chr15	75091032	+	55	69	56	0.0665188	4	113	76	37	FALSE	FALSE	7	6	0.857143	-12.609	0.189267	SH3_domain				Library	-0.14	0.0750498	0.634412	0.588696	0.4	0.675674
ENSG00000103653	ENST00000439220	ENSP00000414764	CSK	CSK-002	PRINCIPAL:1	30	F	TTC	AGCACGTCTCCTTTGCAGAA	chr15	75091030	-	63	84	61	0.0665188	4	113	74	39	FALSE	FALSE	7	6	0.857143	-12.609	0.189267	SH3_domain				Library	-0.13	0.0750498	0.511985	0.588696	0.3	0.675674
ENSG00000103653	ENST00000439220	ENSP00000414764	CSK	CSK-002	PRINCIPAL:1	30	F	TTC	GAGCACGTCTCCTTTGCAGA	chr15	75091031	-	71	75	58	0.0665188	4	113	75	38	FALSE	FALSE	7	6	0.857143	-12.609	0.189267	SH3_domain				Library	0.38	0.0750498	0.617877	0.588696	0.92	0.675674
ENSG00000103653	ENST00000439220	ENSP00000414764	CSK	CSK-002	PRINCIPAL:1	31	C	TGC	CAGGACCTGCCCTTCTGCAA	chr15	75091032	+	55	69	56	0.0687361	4	113	76	37	FALSE	FALSE	7	6	0.857143	-7.665	0.145746	SH3_domain				Library	-0.14	0.0717664	0.634412	0.591613	0.4	0.675994
ENSG00000103653	ENST00000439220	ENSP00000414764	CSK	CSK-002	PRINCIPAL:1	31	C	TGC	GAGCACGTCTCCTTTGCAGA	chr15	75091031	-	71	75	58	0.0687361	4	113	75	38	FALSE	FALSE	7	6	0.857143	-7.665	0.145746	SH3_domain				Library	0.38	0.0717664	0.617877	0.591613	0.92	0.675994
ENSG00000103653	ENST00000439220	ENSP00000414764	CSK	CSK-002	PRINCIPAL:1	32	K	AAA								0.0709534	4	113			FALSE		7			-12.242	0.11952	SH3_domain				Library		0.0684964		0.594035		0.676026
ENSG00000103653	ENST00000439220	ENSP00000414764	CSK	CSK-002	PRINCIPAL:1	33	G	GGA								0.0731707	4	113			FALSE		7			-13.342	0.095827	SH3_domain				Library		0.0652487		0.595965		0.675767
ENSG00000103653	ENST00000439220	ENSP00000414764	CSK	CSK-002	PRINCIPAL:1	34	D	GAC								0.075388	4	113			FALSE		7			-13.022	0.087016	SH3_domain				Library		0.0620341		0.597407		0.675214
ENSG00000103653	ENST00000439220	ENSP00000414764	CSK	CSK-002	PRINCIPAL:1	35	V	GTG								0.0776053	4	113			FALSE		7			-10.695	0.074586	SH3_domain				Library		0.0588663		0.598363		0.674367
ENSG00000103653	ENST00000439220	ENSP00000414764	CSK	CSK-002	PRINCIPAL:1	36	L	CTC								0.0798226	4	113			FALSE		7			-10.925	0.067392	SH3_domain				Library		0.0557621		0.598836		0.673222
ENSG00000103653	ENST00000439220	ENSP00000414764	CSK	CSK-002	PRINCIPAL:1	37	T	ACC	AGGAGACGTGCTCACCATTG	chr15	75091052	+	83	84	44	0.0820399	4	113	96	17	FALSE	FALSE	7	6	0.857143	-11.917	0.075406	SH3_domain				Library	0.12	0.0527416	0.551008	0.598832	0.89	0.671778
ENSG00000103653	ENST00000439220	ENSP00000414764	CSK	CSK-002	PRINCIPAL:1	38	I	ATT	AGGAGACGTGCTCACCATTG	chr15	75091052	+	83	84	44	0.0842572	4	113	96	17	FALSE	FALSE	7	6	0.857143	-11.11	0.080131	SH3_domain				Library	0.12	0.0498292	0.551008	0.598353	0.89	0.670033
ENSG00000103653	ENST00000439220	ENSP00000414764	CSK	CSK-002	PRINCIPAL:1	38	I	ATT	TACCTTGGTGACGGCCACAA	chr15	75091055	-	83	94	44	0.0842572	4	113	99	14	FALSE	FALSE	7	6	0.857143	-11.11	0.080131	SH3_domain				Library	0.06	0.0498292	0.772764	0.598353	1.07	0.670033
ENSG00000103653	ENST00000439220	ENSP00000414764	CSK	CSK-002	PRINCIPAL:1	39	V	GTG	TACCTTGGTGACGGCCACAA	chr15	75091055	-	83	94	44	0.0864745	4	113	99	14	FALSE	FALSE	7	6	0.857143	-10.557	0.084644	SH3_domain				Library	0.06	0.0470536	0.772764	0.597406	1.07	0.667985
ENSG00000103653	ENST00000439220	ENSP00000414764	CSK	CSK-002	PRINCIPAL:1	40	A	GCC								0.0886918	4	113			FALSE		7			-8.765	0.098861	SH3_domain				Library		0.0444492		0.595996		0.665629
ENSG00000103653	ENST00000439220	ENSP00000414764	CSK	CSK-002	PRINCIPAL:1	41	V	GTC	CACCATTGTGGCCGTCACCA	chr15	75091064	+	83	86	66	0.0909091	4	113	108	5	FALSE	FALSE	7	6	0.857143	-7.914	0.122934	SH3_domain				Library	0.15	0.0420575	0.317819	0.594128	0.62	0.662957
ENSG00000103653	ENST00000439220	ENSP00000414764	CSK	CSK-002	PRINCIPAL:1	41	V	GTC	TCACCTGATTACCTTGGTGA	chr15	75091064	-	58	78	50	0.0909091	4	113	108	5	FALSE	FALSE	7	6	0.857143	-7.914	0.122934	SH3_domain				Library	0.24	0.0420575	0.479865	0.594128	0.27	0.662957
ENSG00000103653	ENST00000439220	ENSP00000414764	CSK	CSK-002	PRINCIPAL:1	42	T	ACC	CACCATTGTGGCCGTCACCA	chr15	75091064	+	83	86	66	0.0931264	4	113	108	5	FALSE	FALSE	7	6	0.857143	-9.934	0.154624	SH3_domain				Library	0.15	0.0399283	0.317819	0.591807	0.62	0.659961
ENSG00000103653	ENST00000439220	ENSP00000414764	CSK	CSK-002	PRINCIPAL:1	42	T	ACC	TCACCTGATTACCTTGGTGA	chr15	75091064	-	58	78	50	0.0931264	4	113	108	5	FALSE	FALSE	7	6	0.857143	-9.934	0.154624	SH3_domain				Library	0.24	0.0399283	0.479865	0.591807	0.27	0.659961
ENSG00000103653	ENST00000439220	ENSP00000414764	CSK	CSK-002	PRINCIPAL:1	43	K	AAG	TTTGTACCAGTTGGGGTCCT	chr15	75091167	-	69	8	66	0.0953437	4	113	0	112	FALSE	FALSE	7	6	0.857143	-10.479	0.192634	SH3_domain				Library	-0.05	0.0381207	0.622193	0.589042	0.74	0.656635
ENSG00000103653	ENST00000439220	ENSP00000414764	CSK	CSK-002	PRINCIPAL:1	43	K	AAG	CTTTGTACCAGTTGGGGTCC	chr15	75091168	-	69	6	68	0.0953437	4	113	1	111	FALSE	FALSE	7	6	0.857143	-10.479	0.192634	SH3_domain				Library	0.6	0.0381207	0.924039	0.589042	0.38	0.656635
ENSG00000103653	ENST00000439220	ENSP00000414764	CSK	CSK-002	PRINCIPAL:1	44	D	GAC	CCTCTCCCCAGGACCCCAAC	chr15	75091172	+	36	27	55	0.097561	5	112	5	107	FALSE	FALSE	7	6	0.857143	-12.618	0.249963	SH3_domain				Library	-0.18	0.0367043	0.793796	0.585842	0.57	0.652976
ENSG00000103653	ENST00000439220	ENSP00000414764	CSK	CSK-002	PRINCIPAL:1	44	D	GAC	TTTGTACCAGTTGGGGTCCT	chr15	75091167	-	69	8	66	0.097561	5	112	0	112	FALSE	FALSE	7	6	0.857143	-12.618	0.249963	SH3_domain				Library	-0.05	0.0367043	0.622193	0.585842	0.74	0.652976
ENSG00000103653	ENST00000439220	ENSP00000414764	CSK	CSK-002	PRINCIPAL:1	44	D	GAC	CTTTGTACCAGTTGGGGTCC	chr15	75091168	-	69	6	68	0.097561	5	112	1	111	FALSE	FALSE	7	6	0.857143	-12.618	0.249963	SH3_domain				Library	0.6	0.0367043	0.924039	0.585842	0.38	0.652976
ENSG00000103653	ENST00000439220	ENSP00000414764	CSK	CSK-002	PRINCIPAL:1	45	P	CCC	CCTCTCCCCAGGACCCCAAC	chr15	75091172	+	36	27	55	0.0997783	5	112	5	107	FALSE	FALSE	7	6	0.857143	-13.275	0.289075	SH3_domain				Library	-0.18	0.0357585	0.793796	0.582215	0.57	0.648987
ENSG00000103653	ENST00000439220	ENSP00000414764	CSK	CSK-002	PRINCIPAL:1	45	P	CCC	TTTTGGCTTTGTACCAGTTG	chr15	75091174	-	65	59	62	0.0997783	5	112	7	105	FALSE	FALSE	7	6	0.857143	-13.275	0.289075	SH3_domain				Library		0.0357585		0.582215		0.648987
ENSG00000103653	ENST00000439220	ENSP00000414764	CSK	CSK-002	PRINCIPAL:1	45	P	CCC	TTTTTGGCTTTGTACCAGTT	chr15	75091175	-	64	18	60	0.0997783	5	112	8	104	FALSE	FALSE	7	6	0.857143	-13.275	0.289075	SH3_domain				Library		0.0357585		0.582215		0.648987
ENSG00000103653	ENST00000439220	ENSP00000414764	CSK	CSK-002	PRINCIPAL:1	46	N	AAC	TTTTGGCTTTGTACCAGTTG	chr15	75091174	-	65	59	62	0.101996	5	112	7	105	FALSE	FALSE	7	6	0.857143	-12.584	0.304473	SH3_domain				Library		0.0353705		0.578164		0.644676
ENSG00000103653	ENST00000439220	ENSP00000414764	CSK	CSK-002	PRINCIPAL:1	46	N	AAC	TTTTTGGCTTTGTACCAGTT	chr15	75091175	-	64	18	60	0.101996	5	112	8	104	FALSE	FALSE	7	6	0.857143	-12.584	0.304473	SH3_domain				Library		0.0353705		0.578164		0.644676
ENSG00000103653	ENST00000439220	ENSP00000414764	CSK	CSK-002	PRINCIPAL:1	46	N	AAC	GTTTTTGGCTTTGTACCAGT	chr15	75091176	-	69	25	57	0.101996	5	112	9	103	FALSE	FALSE	7	6	0.857143	-12.584	0.304473	SH3_domain				Library		0.0353705		0.578164		0.644676
ENSG00000103653	ENST00000439220	ENSP00000414764	CSK	CSK-002	PRINCIPAL:1	47	W	TGG	GTTTTTGGCTTTGTACCAGT	chr15	75091176	-	69	25	57	0.104213	5	112	9	103	FALSE	FALSE	7	6	0.857143	-17.47	0.349054	SH3_domain				Library		0.0356212		0.573681		0.64007
ENSG00000103653	ENST00000439220	ENSP00000414764	CSK	CSK-002	PRINCIPAL:1	48	Y	TAC								0.10643	5	112			FALSE		7			-13.914	0.40093	SH3_domain				Library		0.0365396		0.568742		0.635224
ENSG00000103653	ENST00000439220	ENSP00000414764	CSK	CSK-002	PRINCIPAL:1	49	K	AAA								0.108647	5	112			FALSE		7			-11.852	0.42396	SH3_domain				Library		0.0379962		0.563286		0.630249
ENSG00000103653	ENST00000439220	ENSP00000414764	CSK	CSK-002	PRINCIPAL:1	50	A	GCC								0.110865	5	112			FALSE		7			-11.428	0.452451	SH3_domain				Library		0.0395148		0.557187		0.62534
ENSG00000103653	ENST00000439220	ENSP00000414764	CSK	CSK-002	PRINCIPAL:1	51	K	AAA	CTGGTACAAAGCCAAAAACA	chr15	75091191	+	46	94	63	0.113082	5	112	24	88	FALSE	FALSE	7	6	0.857143	-10.785	0.428635	SH3_domain				Library	0.28	0.0401327	0.361107	0.550215	0.73	0.62076
ENSG00000103653	ENST00000439220	ENSP00000414764	CSK	CSK-002	PRINCIPAL:1	51	K	AAA	CTCACGGCCCACCTTGTTTT	chr15	75091191	-	76	0	58	0.113082	5	112	24	88	FALSE	FALSE	7	6	0.857143	-10.785	0.428635	SH3_domain				Library		0.0401327		0.550215		0.62076
ENSG00000103653	ENST00000439220	ENSP00000414764	CSK	CSK-002	PRINCIPAL:1	52	N	AAC	CTGGTACAAAGCCAAAAACA	chr15	75091191	+	46	94	63	0.115299	5	112	24	88	FALSE	FALSE	7	6	0.857143	-10.766	0.412084	SH3_domain				Library	0.28	0.0362902	0.361107	0.540994	0.73	0.616758
ENSG00000103653	ENST00000439220	ENSP00000414764	CSK	CSK-002	PRINCIPAL:1	52	N	AAC	GTACAAAGCCAAAAACAAGG	chr15	75091194	+	39	99	57	0.115299	5	112	27	85	FALSE	FALSE	7	6	0.857143	-10.766	0.412084	SH3_domain				Library	0.2	0.0362902	0.765399	0.540994	0.93	0.616758
ENSG00000103653	ENST00000439220	ENSP00000414764	CSK	CSK-002	PRINCIPAL:1	52	N	AAC	TACAAAGCCAAAAACAAGGT	chr15	75091195	+	41	86	59	0.115299	5	112	28	84	FALSE	FALSE	7	6	0.857143	-10.766	0.412084	SH3_domain				Library	-0.4	0.0362902	0.490692	0.540994	0.43	0.616758
ENSG00000103653	ENST00000439220	ENSP00000414764	CSK	CSK-002	PRINCIPAL:1	52	N	AAC	CTCACGGCCCACCTTGTTTT	chr15	75091191	-	76	0	58	0.115299	5	112	24	88	FALSE	FALSE	7	6	0.857143	-10.766	0.412084	SH3_domain				Library		0.0362902		0.540994		0.616758
ENSG00000103653	ENST00000439220	ENSP00000414764	CSK	CSK-002	PRINCIPAL:1	53	K	AAG	GTACAAAGCCAAAAACAAGG	chr15	75091194	+	39	99	57	0.117517	5	112	27	85	FALSE	FALSE	7	6	0.857143	-9.09	0.410542	SH3_domain				Library	0.2	0.0312046	0.765399	0.530697	0.93	0.612935
ENSG00000103653	ENST00000439220	ENSP00000414764	CSK	CSK-002	PRINCIPAL:1	53	K	AAG	TACAAAGCCAAAAACAAGGT	chr15	75091195	+	41	86	59	0.117517	5	112	28	84	FALSE	FALSE	7	6	0.857143	-9.09	0.410542	SH3_domain				Library	-0.4	0.0312046	0.490692	0.530697	0.43	0.612935
ENSG00000103653	ENST00000439220	ENSP00000414764	CSK	CSK-002	PRINCIPAL:1	54	V	GTG								0.119734	5	112			FALSE		7			-8.135	0.404244	SH3_domain				Library		0.0224874		0.517458		0.609027
ENSG00000103653	ENST00000439220	ENSP00000414764	CSK	CSK-002	PRINCIPAL:1	55	G	GGC	CAAAAACAAGGTGGGCCGTG	chr15	75091203	+	68	84	51	0.121951	5	112	36	76	FALSE	FALSE	7	6	0.857143	-13.21	0.38183	SH3_domain				Library	0.24	0.0151465	0.763037	0.50493	1.11	0.605097
ENSG00000103653	ENST00000439220	ENSP00000414764	CSK	CSK-002	PRINCIPAL:1	55	G	GGC	AAAAACAAGGTGGGCCGTGA	chr15	75091204	+	71	66	49	0.121951	5	112	37	75	FALSE	FALSE	7	6	0.857143	-13.21	0.38183	SH3_domain				Library	0.18	0.0151465	0.50182	0.50493	0.87	0.605097
ENSG00000103653	ENST00000439220	ENSP00000414764	CSK	CSK-002	PRINCIPAL:1	56	R	CGT	CAAAAACAAGGTGGGCCGTG	chr15	75091203	+	68	84	51	0.124169	5	112	36	76	FALSE	FALSE	7	6	0.857143	-10.684	0.359575	SH3_domain				Library	0.24	0.00860156	0.763037	0.493874	1.11	0.60183
ENSG00000103653	ENST00000439220	ENSP00000414764	CSK	CSK-002	PRINCIPAL:1	56	R	CGT	AAAAACAAGGTGGGCCGTGA	chr15	75091204	+	71	66	49	0.124169	5	112	37	75	FALSE	FALSE	7	6	0.857143	-10.684	0.359575	SH3_domain				Library	0.18	0.00860156	0.50182	0.493874	0.87	0.60183
ENSG00000103653	ENST00000439220	ENSP00000414764	CSK	CSK-002	PRINCIPAL:1	56	R	CGT	TGGCTGGGATGATGCCCTCA	chr15	75091207	-	51	69	54	0.124169	5	112	40	72	FALSE	FALSE	7	6	0.857143	-10.684	0.359575	SH3_domain				Library	-0.5	0.00860156	0.0339576	0.493874	0.21	0.60183
ENSG00000103653	ENST00000439220	ENSP00000414764	CSK	CSK-002	PRINCIPAL:1	57	E	GAG	TGGCTGGGATGATGCCCTCA	chr15	75091207	-	51	69	54	0.126386	5	112	40	72	FALSE	FALSE	7	6	0.857143	-12.643	0.348084	SH3_domain				Library	-0.5	-0.000999747	0.0339576	0.480236	0.21	0.597828
ENSG00000103653	ENST00000439220	ENSP00000414764	CSK	CSK-002	PRINCIPAL:1	58	G	GGC								0.128603	5	112			FALSE		7			-14.113	0.303666	SH3_domain				Library		-0.0131777		0.463894		0.592025
ENSG00000103653	ENST00000439220	ENSP00000414764	CSK	CSK-002	PRINCIPAL:1	59	I	ATC								0.13082	5	112			FALSE		7			-10.433	0.248758	SH3_domain				Library		-0.0261602		0.447667		0.585038
ENSG00000103653	ENST00000439220	ENSP00000414764	CSK	CSK-002	PRINCIPAL:1	60	I	ATC								0.133038	5	112			FALSE		7			-10.433	0.227971	SH3_domain				Library		-0.0394619		0.432385		0.57727
ENSG00000103653	ENST00000439220	ENSP00000414764	CSK	CSK-002	PRINCIPAL:1	61	P	CCA	GCTTCTGGACGTAGTTGGCT	chr15	75091222	-	85	56	60	0.135255	5	112	55	57	FALSE	FALSE	7	6	0.857143	-13.743	0.227198	SH3_domain				Library		-0.0502341		0.419768		0.572815
ENSG00000103653	ENST00000439220	ENSP00000414764	CSK	CSK-002	PRINCIPAL:1	61	P	CCA	CGCTTCTGGACGTAGTTGGC	chr15	75091223	-	94	8	58	0.135255	5	112	56	56	FALSE	FALSE	7	6	0.857143	-13.743	0.227198	SH3_domain				Library	-0.1	-0.0502341	0.317251	0.419768	0.39	0.572815
ENSG00000103653	ENST00000439220	ENSP00000414764	CSK	CSK-002	PRINCIPAL:1	62	A	GCC	GCTTCTGGACGTAGTTGGCT	chr15	75091222	-	85	56	60	0.137472	5	112	55	57	FALSE	FALSE	7	6	0.857143	-11.425	0.224498	SH3_domain				Library		-0.0630813		0.40605		0.566101
ENSG00000103653	ENST00000439220	ENSP00000414764	CSK	CSK-002	PRINCIPAL:1	62	A	GCC	CGCTTCTGGACGTAGTTGGC	chr15	75091223	-	94	8	58	0.137472	5	112	56	56	FALSE	FALSE	7	6	0.857143	-11.425	0.224498	SH3_domain				Library	-0.1	-0.0630813	0.317251	0.40605	0.39	0.566101
ENSG00000103653	ENST00000439220	ENSP00000414764	CSK	CSK-002	PRINCIPAL:1	63	N	AAC	CTCCCGCTTCTGGACGTAGT	chr15	75091227	-	93	40	63	0.13969	5	112	60	52	FALSE	FALSE	7	6	0.857143	-13.173	0.234467	SH3_domain				Library	-0.33	-0.0761865	0.388319	0.392334	0.66	0.560509
ENSG00000103653	ENST00000439220	ENSP00000414764	CSK	CSK-002	PRINCIPAL:1	64	Y	TAC	CTCCCGCTTCTGGACGTAGT	chr15	75091227	-	93	40	63	0.141907	5	112	60	52	FALSE	FALSE	7	6	0.857143	-13.402	0.250474	SH3_domain				Library	-0.33	-0.0909509	0.388319	0.377827	0.66	0.553815
ENSG00000103653	ENST00000439220	ENSP00000414764	CSK	CSK-002	PRINCIPAL:1	65	V	GTC	CAGCCAACTACGTCCAGAAG	chr15	75091235	+	87	86	52	0.144124	5	112	68	44	FALSE	FALSE	7	5	0.714286	-11.097	0.287896	SH3_domain				Library	-0.18	-0.10629	0.477451	0.363625	0.54	0.545119
ENSG00000103653	ENST00000439220	ENSP00000414764	CSK	CSK-002	PRINCIPAL:1	66	Q	CAG	CAGCCAACTACGTCCAGAAG	chr15	75091235	+	87	86	52	0.146341	5	112	68	44	FALSE	FALSE	7	5	0.714286	-10.038	0.343399	SH3_domain				Library	-0.18	-0.12319	0.477451	0.348282	0.54	0.536312
ENSG00000103653	ENST00000439220	ENSP00000414764	CSK	CSK-002	PRINCIPAL:1	66	Q	CAG	AGCCAACTACGTCCAGAAGC	chr15	75091236	+	76	66	53	0.146341	5	112	69	43	FALSE	FALSE	7	5	0.714286	-10.038	0.343399	SH3_domain				Library		-0.12319		0.348282		0.536312
ENSG00000103653	ENST00000439220	ENSP00000414764	CSK	CSK-002	PRINCIPAL:1	66	Q	CAG	CCTTCACGCCCTCCCGCTTC	chr15	75091237	-	70	5	65	0.146341	5	112	70	42	FALSE	FALSE	7	5	0.714286	-10.038	0.343399	SH3_domain				Library		-0.12319		0.348282		0.536312
ENSG00000103653	ENST00000439220	ENSP00000414764	CSK	CSK-002	PRINCIPAL:1	67	K	AAG	AGCCAACTACGTCCAGAAGC	chr15	75091236	+	76	66	53	0.148559	5	112	69	43	FALSE	FALSE	7	5	0.714286	-9.263	0.418109	SH3_domain				Library		-0.139355		0.334312		0.526487
ENSG00000103653	ENST00000439220	ENSP00000414764	CSK	CSK-002	PRINCIPAL:1	67	K	AAG	CAACTACGTCCAGAAGCGGG	chr15	75091239	+	94	95	59	0.148559	5	112	72	40	FALSE	FALSE	7	5	0.714286	-9.263	0.418109	SH3_domain				Library	-0.08	-0.139355	0.47037	0.334312	0.48	0.526487
ENSG00000103653	ENST00000439220	ENSP00000414764	CSK	CSK-002	PRINCIPAL:1	67	K	AAG	AACTACGTCCAGAAGCGGGA	chr15	75091240	+	88	89	64	0.148559	5	112	73	39	FALSE	FALSE	7	5	0.714286	-9.263	0.418109	SH3_domain				Library	0.22	-0.139355	0.276238	0.334312	0.57	0.526487
ENSG00000103653	ENST00000439220	ENSP00000414764	CSK	CSK-002	PRINCIPAL:1	67	K	AAG	CCTTCACGCCCTCCCGCTTC	chr15	75091237	-	70	5	65	0.148559	5	112	70	42	FALSE	FALSE	7	5	0.714286	-9.263	0.418109	SH3_domain				Library		-0.139355		0.334312		0.526487
ENSG00000103653	ENST00000439220	ENSP00000414764	CSK	CSK-002	PRINCIPAL:1	68	R	CGG	CAACTACGTCCAGAAGCGGG	chr15	75091239	+	94	95	59	0.150776	5	112	72	40	FALSE	FALSE	7	5	0.714286	-8.958	0.460026	SH3_domain				Library	-0.08	-0.156866	0.47037	0.318493	0.48	0.516542
ENSG00000103653	ENST00000439220	ENSP00000414764	CSK	CSK-002	PRINCIPAL:1	68	R	CGG	AACTACGTCCAGAAGCGGGA	chr15	75091240	+	88	89	64	0.150776	5	112	73	39	FALSE	FALSE	7	5	0.714286	-8.958	0.460026	SH3_domain				Library	0.22	-0.156866	0.276238	0.318493	0.57	0.516542
ENSG00000103653	ENST00000439220	ENSP00000414764	CSK	CSK-002	PRINCIPAL:1	69	E	GAG								0.152993	5	112			FALSE		7			-7.99	0.472844	SH3_domain				Library		-0.172943		0.30537		0.506306
ENSG00000103653	ENST00000439220	ENSP00000414764	CSK	CSK-002	PRINCIPAL:1	70	G	GGC	CCAGAAGCGGGAGGGCGTGA	chr15	75091248	+	70	75	63	0.155211	5	112	81	31	FALSE	FALSE	7	5	0.714286	-6.999	0.464007	SH3_domain				Library	-0.16	-0.188809	0.595082	0.293195	0.25	0.496034
ENSG00000103653	ENST00000439220	ENSP00000414764	CSK	CSK-002	PRINCIPAL:1	71	V	GTG	CCAGAAGCGGGAGGGCGTGA	chr15	75091248	+	70	75	63	0.157428	5	112	81	31	FALSE	FALSE	7	5	0.714286	-6.692	0.460375	SH3_domain				Library	-0.16	-0.20391	0.595082	0.285213	0.25	0.485742
ENSG00000103653	ENST00000439220	ENSP00000414764	CSK	CSK-002	PRINCIPAL:1	71	V	GTG	GAAGCGGGAGGGCGTGAAGG	chr15	75091251	+	46	53	71	0.157428	5	112	84	28	FALSE	FALSE	7	5	0.714286	-6.692	0.460375	SH3_domain				Library		-0.20391		0.285213		0.485742
ENSG00000103653	ENST00000439220	ENSP00000414764	CSK	CSK-002	PRINCIPAL:1	71	V	GTG	AAGCGGGAGGGCGTGAAGGC	chr15	75091252	+	58	30	68	0.157428	5	112	85	27	FALSE	FALSE	7	5	0.714286	-6.692	0.460375	SH3_domain				Library	-0.16	-0.20391	0.163098	0.285213	-0.01	0.485742
ENSG00000103653	ENST00000439220	ENSP00000414764	CSK	CSK-002	PRINCIPAL:1	72	K	AAG	GAAGCGGGAGGGCGTGAAGG	chr15	75091251	+	46	53	71	0.159645	5	112	84	28	FALSE	FALSE	7	5	0.714286	-6.085	0.429418	SH3_domain				Library		-0.218748		0.278383		0.475955
ENSG00000103653	ENST00000439220	ENSP00000414764	CSK	CSK-002	PRINCIPAL:1	72	K	AAG	AAGCGGGAGGGCGTGAAGGC	chr15	75091252	+	58	30	68	0.159645	5	112	85	27	FALSE	FALSE	7	5	0.714286	-6.085	0.429418	SH3_domain				Library	-0.16	-0.218748	0.163098	0.278383	-0.01	0.475955
ENSG00000103653	ENST00000439220	ENSP00000414764	CSK	CSK-002	PRINCIPAL:1	73	A	GCG								0.161863	5	112			FALSE		7			-5.87	0.42594	SH3_domain				Library		-0.233879		0.268899		0.466217
ENSG00000103653	ENST00000439220	ENSP00000414764	CSK	CSK-002	PRINCIPAL:1	74	G	GGT								0.16408	5	112			FALSE		7			-6.682	0.412883	SH3_domain				Library		-0.247912		0.262971		0.457389
ENSG00000103653	ENST00000439220	ENSP00000414764	CSK	CSK-002	PRINCIPAL:1	75	T	ACC								0.166297	5	112			FALSE		7			-4.874	0.365224	SH3_domain				Library		-0.262299		0.254331		0.448313
ENSG00000103653	ENST00000439220	ENSP00000414764	CSK	CSK-002	PRINCIPAL:1	76	K	AAA	TCACGGCATGAGGCTGAGTT	chr15	75091266	-	48	30	76	0.168514	5	112	99	13	FALSE	FALSE	7	5	0.714286	-7.017	0.317285	SH3_domain				Library	-0.19	-0.276496	0.175306	0.243734	0.78	0.438816
ENSG00000103653	ENST00000439220	ENSP00000414764	CSK	CSK-002	PRINCIPAL:1	77	L	CTC	TCACGGCATGAGGCTGAGTT	chr15	75091266	-	48	30	76	0.170732	5	112	99	13	FALSE	FALSE	7	5	0.714286	-8.176	0.257122	SH3_domain;SH2				Library	-0.19	-0.28995	0.175306	0.236204	0.78	0.430376
ENSG00000103653	ENST00000439220	ENSP00000414764	CSK	CSK-002	PRINCIPAL:1	78	S	AGC								0.172949	5	112			FALSE		7			-8.295	0.211535	SH3_domain;SH2				Library		-0.303504		0.230662		0.423153
ENSG00000103653	ENST00000439220	ENSP00000414764	CSK	CSK-002	PRINCIPAL:1	79	L	CTC	CTCGTGGTACTCACGGCATG	chr15	75091276	-	92	84	70	0.175166	5	112	109	3	FALSE	FALSE	7	6	0.857143	-8.188	0.190997	SH3_domain;SH2				Library	-0.27	-0.317352	0.18638	0.224625	0.75	0.416333
ENSG00000103653	ENST00000439220	ENSP00000414764	CSK	CSK-002	PRINCIPAL:1	80	M	ATG	CTCGTGGTACTCACGGCATG	chr15	75091276	-	92	84	70	0.177384	5	112	109	3	FALSE	FALSE	7	6	0.857143	-9.714	0.172781	SH3_domain;SH2				Library	-0.27	-0.33089	0.18638	0.21707	0.75	0.408754
ENSG00000103653	ENST00000439220	ENSP00000414764	CSK	CSK-002	PRINCIPAL:1	80	M	ATG	ATCTTGCCGTGGAACCAACT	chr15	75091613	-	89	66	77	0.177384	5	112	0	219	FALSE	FALSE	7	6	0.857143	-9.714	0.172781	SH3_domain;SH2				Library	-0.53	-0.33089	0.159602	0.21707	0.41	0.408754
ENSG00000103653	ENST00000439220	ENSP00000414764	CSK	CSK-002	PRINCIPAL:1	81	P	CCT	ATCTTGCCGTGGAACCAACT	chr15	75091613	-	89	66	77	0.179601	6	112	0	219	FALSE	FALSE	7	6	0.857143	-13.586	0.15861	SH3_domain;SH2				Library	-0.53	-0.344794	0.159602	0.210325	0.41	0.402435
ENSG00000103653	ENST00000439220	ENSP00000414764	CSK	CSK-002	PRINCIPAL:1	81	P	CCT	GATCTTGCCGTGGAACCAAC	chr15	75091614	-	91	35	69	0.179601	6	112	1	218	FALSE	FALSE	7	6	0.857143	-13.586	0.15861	SH3_domain;SH2				Library	-0.28	-0.344794	-0.28532	0.210325	0.58	0.402435
ENSG00000103653	ENST00000439220	ENSP00000414764	CSK	CSK-002	PRINCIPAL:1	82	W	TGG	CTGCTCCCCAGTTGGTTCCA	chr15	75091618	+	60	59	70	0.181818	6	219	5	214	TRUE	FALSE	7	6	0.857143	-18.318	0.138418	SH3_domain;SH2				Library	-0.78	-0.358441	0.158672	0.202959	0.31	0.39611
ENSG00000103653	ENST00000439220	ENSP00000414764	CSK	CSK-002	PRINCIPAL:1	82	W	TGG	GATCTTGCCGTGGAACCAAC	chr15	75091614	-	91	35	69	0.181818	6	219	1	218	TRUE	FALSE	7	6	0.857143	-18.318	0.138418	SH3_domain;SH2				Library	-0.28	-0.358441	-0.28532	0.202959	0.58	0.39611
ENSG00000103653	ENST00000439220	ENSP00000414764	CSK	CSK-002	PRINCIPAL:1	83	F	TTC	CTGCTCCCCAGTTGGTTCCA	chr15	75091618	+	60	59	70	0.184035	6	219	5	214	TRUE	FALSE	7	6	0.857143	-14.115	0.15359	SH3_domain;SH2				Library	-0.78	-0.371583	0.158672	0.194935	0.31	0.38886
ENSG00000103653	ENST00000439220	ENSP00000414764	CSK	CSK-002	PRINCIPAL:1	84	H	CAC	GCTCCCGTGTGATCTTGCCG	chr15	75091624	-	95	86	70	0.186253	6	219	11	208	TRUE	FALSE	7	6	0.857143	-16.148	0.16906	SH3_domain;SH2				Library		-0.384679		0.186739		0.38231
ENSG00000103653	ENST00000439220	ENSP00000414764	CSK	CSK-002	PRINCIPAL:1	85	G	GGC	GCTCCCGTGTGATCTTGCCG	chr15	75091624	-	95	86	70	0.18847	6	219	11	208	TRUE	FALSE	7	6	0.857143	-14.262	0.204883	SH3_domain;SH2				Library		-0.397623		0.178832		0.374203
ENSG00000103653	ENST00000439220	ENSP00000414764	CSK	CSK-002	PRINCIPAL:1	86	K	AAG	GGTTCCACGGCAAGATCACA	chr15	75091631	+	33	78	76	0.190687	6	219	18	201	TRUE	FALSE	7	6	0.857143	-13.26	0.24059	SH3_domain;SH2				Library	-0.28	-0.410666	-0.0800754	0.171398	0.24	0.365928
ENSG00000103653	ENST00000439220	ENSP00000414764	CSK	CSK-002	PRINCIPAL:1	87	I	ATC	GGTTCCACGGCAAGATCACA	chr15	75091631	+	33	78	76	0.192905	6	219	18	201	TRUE	FALSE	7	6	0.857143	-12.385	0.26874	SH3_domain;SH2				Library	-0.28	-0.423618	-0.0800754	0.164549	0.24	0.357936
ENSG00000103653	ENST00000439220	ENSP00000414764	CSK	CSK-002	PRINCIPAL:1	87	I	ATC	GTTCCACGGCAAGATCACAC	chr15	75091632	+	85	98	77	0.192905	6	219	19	200	TRUE	FALSE	7	6	0.857143	-12.385	0.26874	SH3_domain;SH2				Library	-0.31	-0.423618	0.289556	0.164549	0.36	0.357936
ENSG00000103653	ENST00000439220	ENSP00000414764	CSK	CSK-002	PRINCIPAL:1	88	T	ACA	GTTCCACGGCAAGATCACAC	chr15	75091632	+	85	98	77	0.195122	6	219	19	200	TRUE	FALSE	7	6	0.857143	-11.316	0.310778	SH3_domain;SH2				Library	-0.31	-0.436281	0.289556	0.155829	0.36	0.351384
ENSG00000103653	ENST00000439220	ENSP00000414764	CSK	CSK-002	PRINCIPAL:1	89	R	CGG	CGGCAAGATCACACGGGAGC	chr15	75091638	+	86	50	53	0.197339	6	219	25	194	TRUE	FALSE	7	6	0.857143	-12.08	0.364589	SH3_domain;SH2				Library		-0.44894		0.148033		0.344226
ENSG00000103653	ENST00000439220	ENSP00000414764	CSK	CSK-002	PRINCIPAL:1	90	E	GAG	CGGCAAGATCACACGGGAGC	chr15	75091638	+	86	50	53	0.199557	6	219	25	194	TRUE	FALSE	7	6	0.857143	-11.331	0.382251	SH3_domain;SH2				Library		-0.461421		0.140254		0.337284
ENSG00000103653	ENST00000439220	ENSP00000414764	CSK	CSK-002	PRINCIPAL:1	91	Q	CAG	TCACACGGGAGCAGGCTGAG	chr15	75091646	+	53	96	68	0.201774	6	219	33	186	TRUE	FALSE	7	6	0.857143	-10.641	0.387697	SH3_domain;SH2				Library	-0.42	-0.473593	0.435358	0.13254	0.06	0.330684
ENSG00000103653	ENST00000439220	ENSP00000414764	CSK	CSK-002	PRINCIPAL:1	92	A	GCT	TCACACGGGAGCAGGCTGAG	chr15	75091646	+	53	96	68	0.203991	6	219	33	186	TRUE	FALSE	7	6	0.857143	-11.896	0.413507	SH3_domain;SH2				Library	-0.42	-0.485271	0.435358	0.124949	0.06	0.324539
ENSG00000103653	ENST00000439220	ENSP00000414764	CSK	CSK-002	PRINCIPAL:1	93	E	GAG								0.206208	6	219			TRUE		7			-11.893	0.415421	SH3_domain;SH2				Library		-0.496153		0.116305		0.317466
ENSG00000103653	ENST00000439220	ENSP00000414764	CSK	CSK-002	PRINCIPAL:1	94	R	CGG								0.208426	6	219			TRUE		7			-9.848	0.390872	SH3_domain;SH2				Library		-0.505435		0.108509		0.3117
ENSG00000103653	ENST00000439220	ENSP00000414764	CSK	CSK-002	PRINCIPAL:1	95	L	CTT								0.210643	6	219			TRUE		7			-10.42	0.34924	SH3_domain;SH2				Library		-0.513116		0.101578		0.307281
ENSG00000103653	ENST00000439220	ENSP00000414764	CSK	CSK-002	PRINCIPAL:1	96	L	CTG								0.21286	6	219			TRUE		7			-10.42	0.317611	SH3_domain;SH2				Library		-0.520789		0.0957103		0.30395
ENSG00000103653	ENST00000439220	ENSP00000414764	CSK	CSK-002	PRINCIPAL:1	97	Y	TAC	TGAGCGGCTTCTGTACCCGC	chr15	75091662	+	93	92	55	0.215078	6	219	49	170	TRUE	FALSE	7	6	0.857143	-8.883	0.287523	SH3_domain;SH2				Library	-0.69	-0.52765	0.409844	0.0901598	0.11	0.301229
ENSG00000103653	ENST00000439220	ENSP00000414764	CSK	CSK-002	PRINCIPAL:1	98	P	CCG	TGAGCGGCTTCTGTACCCGC	chr15	75091662	+	93	92	55	0.217295	6	219	49	170	TRUE	FALSE	7	6	0.857143	-11.675	0.266355	SH3_domain;SH2				Library	-0.69	-0.533737	0.409844	0.0849018	0.11	0.299039
ENSG00000103653	ENST00000439220	ENSP00000414764	CSK	CSK-002	PRINCIPAL:1	98	P	CCG	GGAACAGGCCTGTCTCCGGC	chr15	75091666	-	80	78	53	0.217295	6	219	53	166	TRUE	FALSE	7	6	0.857143	-11.675	0.266355	SH3_domain;SH2				Library		-0.533737		0.0849018		0.299039
ENSG00000103653	ENST00000439220	ENSP00000414764	CSK	CSK-002	PRINCIPAL:1	98	P	CCG	AGGAACAGGCCTGTCTCCGG	chr15	75091667	-	75	78	55	0.217295	6	219	54	165	TRUE	FALSE	7	6	0.857143	-11.675	0.266355	SH3_domain;SH2				Library	-0.65	-0.533737	-0.307769	0.0849018	0.28	0.299039
ENSG00000103653	ENST00000439220	ENSP00000414764	CSK	CSK-002	PRINCIPAL:1	99	P	CCG	CTTCTGTACCCGCCGGAGAC	chr15	75091669	+	91	30	65	0.219512	6	219	56	163	TRUE	FALSE	7	6	0.857143	-11.675	0.250219	SH3_domain;SH2				Library	-0.66	-0.536967	0.474371	0.07956	0.15	0.29788
ENSG00000103653	ENST00000439220	ENSP00000414764	CSK	CSK-002	PRINCIPAL:1	99	P	CCG	GGAACAGGCCTGTCTCCGGC	chr15	75091666	-	80	78	53	0.219512	6	219	53	166	TRUE	FALSE	7	6	0.857143	-11.675	0.250219	SH3_domain;SH2				Library		-0.536967		0.07956		0.29788
ENSG00000103653	ENST00000439220	ENSP00000414764	CSK	CSK-002	PRINCIPAL:1	99	P	CCG	AGGAACAGGCCTGTCTCCGG	chr15	75091667	-	75	78	55	0.219512	6	219	54	165	TRUE	FALSE	7	6	0.857143	-11.675	0.250219	SH3_domain;SH2				Library	-0.65	-0.536967	-0.307769	0.07956	0.28	0.29788
ENSG00000103653	ENST00000439220	ENSP00000414764	CSK	CSK-002	PRINCIPAL:1	99	P	CCG	ACCAGGAACAGGCCTGTCTC	chr15	75091670	-	51	43	62	0.219512	6	219	57	162	TRUE	FALSE	7	6	0.857143	-11.675	0.250219	SH3_domain;SH2				Library	-0.36	-0.536967	0.238947	0.07956	0.46	0.29788
ENSG00000103653	ENST00000439220	ENSP00000414764	CSK	CSK-002	PRINCIPAL:1	100	E	GAG	CTTCTGTACCCGCCGGAGAC	chr15	75091669	+	91	30	65	0.221729	6	219	56	163	TRUE	FALSE	7	6	0.857143	-11.816	0.236988	SH2				Library	-0.66	-0.538765	0.474371	0.0741724	0.15	0.297829
ENSG00000103653	ENST00000439220	ENSP00000414764	CSK	CSK-002	PRINCIPAL:1	100	E	GAG	ACCAGGAACAGGCCTGTCTC	chr15	75091670	-	51	43	62	0.221729	6	219	57	162	TRUE	FALSE	7	6	0.857143	-11.816	0.236988	SH2				Library	-0.36	-0.538765	0.238947	0.0741724	0.46	0.297829
ENSG00000103653	ENST00000439220	ENSP00000414764	CSK	CSK-002	PRINCIPAL:1	101	T	ACA								0.223947	6	219			TRUE		7			-9.28	0.225877	SH2				Library		-0.539438		0.0688463		0.298584
ENSG00000103653	ENST00000439220	ENSP00000414764	CSK	CSK-002	PRINCIPAL:1	102	G	GGC								0.226164	6	219			TRUE		7			-13.842	0.217768	SH2				Library		-0.541825		0.0643166		0.298764
ENSG00000103653	ENST00000439220	ENSP00000414764	CSK	CSK-002	PRINCIPAL:1	103	L	CTG	GCCGGAGACAGGCCTGTTCC	chr15	75091680	+	56	14	66	0.228381	6	219	67	152	TRUE	FALSE	7	6	0.857143	-11.785	0.203563	SH2				Library		-0.546172		0.0606721		0.298106
ENSG00000103653	ENST00000439220	ENSP00000414764	CSK	CSK-002	PRINCIPAL:1	103	L	CTG	TGCTCTCCCGCACCAGGAAC	chr15	75091681	-	68	16	61	0.228381	6	219	68	151	TRUE	FALSE	7	6	0.857143	-11.785	0.203563	SH2				Library	-0.38	-0.546172	0.315717	0.0606721	0.81	0.298106
ENSG00000103653	ENST00000439220	ENSP00000414764	CSK	CSK-002	PRINCIPAL:1	104	F	TTC	GCCGGAGACAGGCCTGTTCC	chr15	75091680	+	56	14	66	0.230599	6	219	67	152	TRUE	FALSE	7	6	0.857143	-13.87	0.201721	SH2				Library		-0.549879		0.0573712		0.297497
ENSG00000103653	ENST00000439220	ENSP00000414764	CSK	CSK-002	PRINCIPAL:1	104	F	TTC	AGACAGGCCTGTTCCTGGTG	chr15	75091685	+	30	63	72	0.230599	6	219	72	147	TRUE	FALSE	7	6	0.857143	-13.87	0.201721	SH2				Library	-0.88	-0.549879	0.00283373	0.0573712	0.02	0.297497
ENSG00000103653	ENST00000439220	ENSP00000414764	CSK	CSK-002	PRINCIPAL:1	104	F	TTC	TGCTCTCCCGCACCAGGAAC	chr15	75091681	-	68	16	61	0.230599	6	219	68	151	TRUE	FALSE	7	6	0.857143	-13.87	0.201721	SH2				Library	-0.38	-0.549879	0.315717	0.0573712	0.81	0.297497
ENSG00000103653	ENST00000439220	ENSP00000414764	CSK	CSK-002	PRINCIPAL:1	105	L	CTG	AGACAGGCCTGTTCCTGGTG	chr15	75091685	+	30	63	72	0.232816	6	219	72	147	TRUE	FALSE	7	6	0.857143	-12.437	0.219204	SH2				Library	-0.88	-0.552585	0.00283373	0.0544187	0.02	0.296867
ENSG00000103653	ENST00000439220	ENSP00000414764	CSK	CSK-002	PRINCIPAL:1	105	L	CTG	GACAGGCCTGTTCCTGGTGC	chr15	75091686	+	53	27	73	0.232816	6	219	73	146	TRUE	FALSE	7	6	0.857143	-12.437	0.219204	SH2				Library	-0.32	-0.552585	-0.0436847	0.0544187	0.35	0.296867
ENSG00000103653	ENST00000439220	ENSP00000414764	CSK	CSK-002	PRINCIPAL:1	105	L	CTG	AGTTGGTGCTCTCCCGCACC	chr15	75091687	-	83	46	70	0.232816	6	219	74	145	TRUE	FALSE	7	6	0.857143	-12.437	0.219204	SH2				Library	-0.64	-0.552585	0.0892293	0.0544187	0.39	0.296867
ENSG00000103653	ENST00000439220	ENSP00000414764	CSK	CSK-002	PRINCIPAL:1	106	V	GTG	GACAGGCCTGTTCCTGGTGC	chr15	75091686	+	53	27	73	0.235033	6	219	73	146	TRUE	FALSE	7	6	0.857143	-12.326	0.24879	SH2				Library	-0.32	-0.551876	-0.0436847	0.0509828	0.35	0.297952
ENSG00000103653	ENST00000439220	ENSP00000414764	CSK	CSK-002	PRINCIPAL:1	106	V	GTG	AGTTGGTGCTCTCCCGCACC	chr15	75091687	-	83	46	70	0.235033	6	219	74	145	TRUE	FALSE	7	6	0.857143	-12.326	0.24879	SH2				Library	-0.64	-0.551876	0.0892293	0.0509828	0.39	0.297952
ENSG00000103653	ENST00000439220	ENSP00000414764	CSK	CSK-002	PRINCIPAL:1	107	R	CGG								0.237251	6	219			TRUE		7			-13.365	0.273176	SH2				Library		-0.548481		0.0470199		0.300796
ENSG00000103653	ENST00000439220	ENSP00000414764	CSK	CSK-002	PRINCIPAL:1	108	E	GAG								0.239468	6	219			TRUE		7			-13.296	0.298563	SH2				Library		-0.54481		0.043427		0.303639
ENSG00000103653	ENST00000439220	ENSP00000414764	CSK	CSK-002	PRINCIPAL:1	109	S	AGC								0.241685	6	219			TRUE		7			-11.952	0.32036	SH2				Library		-0.541005		0.0402815		0.306406
ENSG00000103653	ENST00000439220	ENSP00000414764	CSK	CSK-002	PRINCIPAL:1	110	T	ACC								0.243902	6	219			TRUE		7			-11.558	0.324118	SH2				Library		-0.537198		0.0376051		0.309048
ENSG00000103653	ENST00000439220	ENSP00000414764	CSK	CSK-002	PRINCIPAL:1	111	N	AAC	CGGGAGAGCACCAACTACCC	chr15	75091705	+	88	86	55	0.24612	6	219	92	127	TRUE	FALSE	7	5	0.714286	-12.758	0.314422	SH2				Library	-0.56	-0.533441	0.0707431	0.0353845	0.59	0.311556
ENSG00000103653	ENST00000439220	ENSP00000414764	CSK	CSK-002	PRINCIPAL:1	111	N	AAC	CGTGTAGTCTCCGGGGTAGT	chr15	75091704	-	92	23	67	0.24612	6	219	91	128	TRUE	FALSE	7	5	0.714286	-12.758	0.314422	SH2				Library	-0.22	-0.533441	-0.111328	0.0353845	0.08	0.311556
ENSG00000103653	ENST00000439220	ENSP00000414764	CSK	CSK-002	PRINCIPAL:1	112	Y	TAC	CGGGAGAGCACCAACTACCC	chr15	75091705	+	88	86	55	0.248337	6	219	92	127	TRUE	FALSE	7	5	0.714286	-13.67	0.327797	SH2				Library	-0.56	-0.530369	0.0707431	0.0337374	0.59	0.313404
ENSG00000103653	ENST00000439220	ENSP00000414764	CSK	CSK-002	PRINCIPAL:1	112	Y	TAC	CGTGTAGTCTCCGGGGTAGT	chr15	75091704	-	92	23	67	0.248337	6	219	91	128	TRUE	FALSE	7	5	0.714286	-13.67	0.327797	SH2				Library	-0.22	-0.530369	-0.111328	0.0337374	0.08	0.313404
ENSG00000103653	ENST00000439220	ENSP00000414764	CSK	CSK-002	PRINCIPAL:1	113	P	CCC	CGCACAGCGTGTAGTCTCCG	chr15	75091711	-	91	97	55	0.250554	6	219	98	121	TRUE	FALSE	7	5	0.714286	-14.747	0.297701	SH2				Library	-0.54	-0.527151	-0.022399	0.0325099	0.6	0.314801
ENSG00000103653	ENST00000439220	ENSP00000414764	CSK	CSK-002	PRINCIPAL:1	113	P	CCC	ACGCACAGCGTGTAGTCTCC	chr15	75091712	-	89	35	53	0.250554	6	219	99	120	TRUE	FALSE	7	5	0.714286	-14.747	0.297701	SH2				Library	-0.89	-0.527151	-0.598027	0.0325099	-0.12	0.314801
ENSG00000103653	ENST00000439220	ENSP00000414764	CSK	CSK-002	PRINCIPAL:1	114	G	GGA	CGCACAGCGTGTAGTCTCCG	chr15	75091711	-	91	97	55	0.252772	6	219	98	121	TRUE	FALSE	7	5	0.714286	-14.3	0.269094	SH2				Library	-0.54	-0.522716	-0.022399	0.0313212	0.6	0.317042
ENSG00000103653	ENST00000439220	ENSP00000414764	CSK	CSK-002	PRINCIPAL:1	114	G	GGA	ACGCACAGCGTGTAGTCTCC	chr15	75091712	-	89	35	53	0.252772	6	219	99	120	TRUE	FALSE	7	5	0.714286	-14.3	0.269094	SH2				Library	-0.89	-0.522716	-0.598027	0.0313212	-0.12	0.317042
ENSG00000103653	ENST00000439220	ENSP00000414764	CSK	CSK-002	PRINCIPAL:1	114	G	GGA	CACGCACAGCGTGTAGTCTC	chr15	75091713	-	88	27	48	0.252772	6	219	100	119	TRUE	FALSE	7	5	0.714286	-14.3	0.269094	SH2				Library	-0.65	-0.522716	0.150163	0.0313212	0.24	0.317042
ENSG00000103653	ENST00000439220	ENSP00000414764	CSK	CSK-002	PRINCIPAL:1	115	D	GAC	CACGCACAGCGTGTAGTCTC	chr15	75091713	-	88	27	48	0.254989	6	219	100	119	TRUE	FALSE	7	5	0.714286	-14.3	0.245879	SH2				Library	-0.65	-0.51761	0.150163	0.0303542	0.24	0.319526
ENSG00000103653	ENST00000439220	ENSP00000414764	CSK	CSK-002	PRINCIPAL:1	116	Y	TAC								0.257206	6	219			TRUE		7			-15.188	0.214511	SH2				Library		-0.511996		0.0296747		0.321663
ENSG00000103653	ENST00000439220	ENSP00000414764	CSK	CSK-002	PRINCIPAL:1	117	T	ACG								0.259424	6	219			TRUE		7			-12.616	0.155768	SH2				Library		-0.505682		0.0291768		0.323796
ENSG00000103653	ENST00000439220	ENSP00000414764	CSK	CSK-002	PRINCIPAL:1	118	L	CTG								0.261641	6	219			TRUE		7			-12.285	0.12785	SH2				Library		-0.498475		0.028306		0.326861
ENSG00000103653	ENST00000439220	ENSP00000414764	CSK	CSK-002	PRINCIPAL:1	119	C	TGC								0.263858	6	219			TRUE		7			-15.044	0.125835	SH2				Library		-0.490335		0.0270145		0.33055
ENSG00000103653	ENST00000439220	ENSP00000414764	CSK	CSK-002	PRINCIPAL:1	120	V	GTG								0.266075	6	219			TRUE		7			-9.897	0.129366	SH2				Library		-0.482037		0.026501		0.333357
ENSG00000103653	ENST00000439220	ENSP00000414764	CSK	CSK-002	PRINCIPAL:1	121	S	AGC	ACGCTGTGCGTGAGCTGCGA	chr15	75091735	+	85	75	43	0.268293	6	219	122	97	TRUE	FALSE	7	5	0.714286	-7.313	0.152968	SH2				Library	-0.51	-0.473161	0.0168891	0.026217	-0.02	0.336188
ENSG00000103653	ENST00000439220	ENSP00000414764	CSK	CSK-002	PRINCIPAL:1	122	C	TGC	ACGCTGTGCGTGAGCTGCGA	chr15	75091735	+	85	75	43	0.27051	6	219	122	97	TRUE	FALSE	7	5	0.714286	-9.874	0.179699	SH2				Library	-0.51	-0.463689	0.0168891	0.0262812	-0.02	0.33912
ENSG00000103653	ENST00000439220	ENSP00000414764	CSK	CSK-002	PRINCIPAL:1	123	D	GAC	GTGCGTGAGCTGCGACGGCA	chr15	75091740	+	94	69	60	0.272727	6	219	127	92	TRUE	FALSE	7	5	0.714286	-8.618	0.199804	SH2				Library	-0.4	-0.45364	0.227042	0.0268008	0.48	0.342227
ENSG00000103653	ENST00000439220	ENSP00000414764	CSK	CSK-002	PRINCIPAL:1	124	G	GGC	GTGCGTGAGCTGCGACGGCA	chr15	75091740	+	94	69	60	0.274945	6	219	127	92	TRUE	FALSE	7	5	0.714286	-9.718	0.202954	SH2				Library	-0.4	-0.443057	0.227042	0.027865	0.48	0.34558
ENSG00000103653	ENST00000439220	ENSP00000414764	CSK	CSK-002	PRINCIPAL:1	124	G	GGC	CGTGAGCTGCGACGGCAAGG	chr15	75091743	+	88	89	52	0.274945	6	219	130	89	TRUE	FALSE	7	5	0.714286	-9.718	0.202954	SH2				Library	-0.31	-0.443057	-0.178758	0.027865	0.28	0.34558
ENSG00000103653	ENST00000439220	ENSP00000414764	CSK	CSK-002	PRINCIPAL:1	125	K	AAG	CGTGAGCTGCGACGGCAAGG	chr15	75091743	+	88	89	52	0.277162	6	219	130	89	TRUE	FALSE	7	5	0.714286	-11.087	0.232401	SH2				Library	-0.31	-0.431964	-0.178758	0.0295764	0.28	0.34927
ENSG00000103653	ENST00000439220	ENSP00000414764	CSK	CSK-002	PRINCIPAL:1	126	V	GTG								0.279379	6	219			TRUE		7			-10.998	0.238607	SH2				Library		-0.419838		0.0359442		0.351301
ENSG00000103653	ENST00000439220	ENSP00000414764	CSK	CSK-002	PRINCIPAL:1	127	E	GAG								0.281596	6	219			TRUE		7			-11.802	0.233441	SH2				Library		-0.408088		0.0433015		0.354668
ENSG00000103653	ENST00000439220	ENSP00000414764	CSK	CSK-002	PRINCIPAL:1	128	H	CAC								0.283814	6	219			TRUE		7			-15.177	0.235859	SH2				Library		-0.396648		0.0435579		0.361324
ENSG00000103653	ENST00000439220	ENSP00000414764	CSK	CSK-002	PRINCIPAL:1	129	Y	TAC								0.286031	6	219			TRUE		7			-14.961	0.231509	SH2				Library		-0.385111		0.0483058		0.367023
ENSG00000103653	ENST00000439220	ENSP00000414764	CSK	CSK-002	PRINCIPAL:1	130	R	CGC	TGCTGGCATGGTACATGATG	chr15	75091762	-	83	94	55	0.288248	6	219	149	70	TRUE	FALSE	7	5	0.714286	-11.802	0.213284	SH2				Library	-0.61	-0.375184	0.259934	0.0571829	0.55	0.372605
ENSG00000103653	ENST00000439220	ENSP00000414764	CSK	CSK-002	PRINCIPAL:1	131	I	ATC	TGCTGGCATGGTACATGATG	chr15	75091762	-	83	94	55	0.290466	6	219	149	70	TRUE	FALSE	7	5	0.714286	-10.087	0.1972	SH2				Library	-0.61	-0.364797	0.259934	0.0627111	0.55	0.3795
ENSG00000103653	ENST00000439220	ENSP00000414764	CSK	CSK-002	PRINCIPAL:1	132	M	ATG								0.292683	6	219			TRUE		7			-8.002	0.210846	SH2				Library		-0.352221		0.065947		0.386396
ENSG00000103653	ENST00000439220	ENSP00000414764	CSK	CSK-002	PRINCIPAL:1	133	Y	TAC								0.2949	6	219			TRUE		7			-9.547	0.226956	SH2				Library		-0.33958		0.0704743		0.3926
ENSG00000103653	ENST00000439220	ENSP00000414764	CSK	CSK-002	PRINCIPAL:1	134	H	CAT	CGATGCTGAGCTTGCTGGCA	chr15	75091774	-	59	46	56	0.297118	6	219	161	58	TRUE	FALSE	7	5	0.714286	-7.979	0.25989	SH2				Library	0.13	-0.330148	0.0337928	0.0784054	0.75	0.39952
ENSG00000103653	ENST00000439220	ENSP00000414764	CSK	CSK-002	PRINCIPAL:1	135	A	GCC	CGATGCTGAGCTTGCTGGCA	chr15	75091774	-	59	46	56	0.299335	6	219	161	58	TRUE	FALSE	7	5	0.714286	-6.32	0.286683	SH2				Library	0.13	-0.31871	0.0337928	0.0856034	0.75	0.404934
ENSG00000103653	ENST00000439220	ENSP00000414764	CSK	CSK-002	PRINCIPAL:1	136	S	AGC	CTCGTCGATGCTGAGCTTGC	chr15	75091779	-	86	12	48	0.301552	6	219	166	53	TRUE	FALSE	7	5	0.714286	-7.958	0.311748	SH2				Library	0.1	-0.311153	0.304103	0.0948291	0.98	0.412266
ENSG00000103653	ENST00000439220	ENSP00000414764	CSK	CSK-002	PRINCIPAL:1	137	K	AAG	CTCGTCGATGCTGAGCTTGC	chr15	75091779	-	86	12	48	0.303769	6	219	166	53	TRUE	FALSE	7	5	0.714286	-10.15	0.331094	SH2				Library	0.1	-0.308634	0.304103	0.103996	0.98	0.422587
ENSG00000103653	ENST00000439220	ENSP00000414764	CSK	CSK-002	PRINCIPAL:1	138	L	CTC								0.305987	6	219			TRUE		7			-11.22	0.360728	SH2				Library		-0.308557		0.112159		0.43371
ENSG00000103653	ENST00000439220	ENSP00000414764	CSK	CSK-002	PRINCIPAL:1	139	S	AGC								0.308204	6	219			TRUE		7			-9.933	0.38873	SH2				Library		-0.310238		0.119467		0.445127
ENSG00000103653	ENST00000439220	ENSP00000414764	CSK	CSK-002	PRINCIPAL:1	140	I	ATC	CAGCAAGCTCAGCATCGACG	chr15	75091791	+	93	94	47	0.310421	6	219	178	41	TRUE	FALSE	7	5	0.714286	-11.784	0.383056	SH2				Library	-0.5	-0.30798	-0.134189	0.127422	0.19	0.454245
ENSG00000103653	ENST00000439220	ENSP00000414764	CSK	CSK-002	PRINCIPAL:1	141	D	GAC	CAGCAAGCTCAGCATCGACG	chr15	75091791	+	93	94	47	0.312639	6	219	178	41	TRUE	FALSE	7	5	0.714286	-13.186	0.378722	SH2				Library	-0.5	-0.306509	-0.134189	0.135363	0.19	0.463463
ENSG00000103653	ENST00000439220	ENSP00000414764	CSK	CSK-002	PRINCIPAL:1	141	D	GAC	CAAGCTCAGCATCGACGAGG	chr15	75091794	+	95	92	38	0.312639	6	219	181	38	TRUE	FALSE	7	5	0.714286	-13.186	0.378722	SH2				Library	-0.55	-0.306509	-0.0868307	0.135363	0.09	0.463463
ENSG00000103653	ENST00000439220	ENSP00000414764	CSK	CSK-002	PRINCIPAL:1	142	E	GAG	CAAGCTCAGCATCGACGAGG	chr15	75091794	+	95	92	38	0.314856	6	219	181	38	TRUE	FALSE	7	5	0.714286	-11.136	0.353243	SH2				Library	-0.55	-0.30574	-0.0868307	0.143294	0.09	0.472798
ENSG00000103653	ENST00000439220	ENSP00000414764	CSK	CSK-002	PRINCIPAL:1	143	E	GAG								0.317073	6	219			TRUE		7			-11.136	0.294946	SH2				Library		-0.301145		0.153281		0.480321
ENSG00000103653	ENST00000439220	ENSP00000414764	CSK	CSK-002	PRINCIPAL:1	144	V	GTG								0.31929	6	219			TRUE		7			-8.503	0.228879	SH2				Library		-0.297539		0.163528		0.488211
ENSG00000103653	ENST00000439220	ENSP00000414764	CSK	CSK-002	PRINCIPAL:1	145	Y	TAC								0.321508	6	219			TRUE		7			-12.169	0.192773	SH2				Library		-0.298984		0.171518		0.498253
ENSG00000103653	ENST00000439220	ENSP00000414764	CSK	CSK-002	PRINCIPAL:1	146	F	TTT								0.323725	6	219			TRUE		7			-12.935	0.17485	SH2				Library		-0.296698		0.181907		0.506979
ENSG00000103653	ENST00000439220	ENSP00000414764	CSK	CSK-002	PRINCIPAL:1	147	E	GAG								0.325942	6	219			TRUE		7			-11.425	0.16554	SH2				Library		-0.295051		0.192401		0.516241
ENSG00000103653	ENST00000439220	ENSP00000414764	CSK	CSK-002	PRINCIPAL:1	148	N	AAC								0.32816	6	219			TRUE		7			-13.124	0.166919	SH2				Library		-0.294114		0.202883		0.525926
ENSG00000103653	ENST00000439220	ENSP00000414764	CSK	CSK-002	PRINCIPAL:1	149	L	CTC	TCACCTCCACCAGCTGCATG	chr15	75091819	-	49	86	44	0.330377	6	219	206	13	TRUE	FALSE	7	4	0.571429	-11.124	0.173132	SH2				Library	-0.18	-0.294163	0.175189	0.212826	0.61	0.535816
ENSG00000103653	ENST00000439220	ENSP00000414764	CSK	CSK-002	PRINCIPAL:1	150	M	ATG	CTTTGAGAACCTCATGCAGC	chr15	75091821	+	52	72	49	0.332594	6	219	208	11	TRUE	FALSE	7	4	0.571429	-10.348	0.179039	SH2				Library	-0.13	-0.29552	0.645919	0.221658	0.34	0.545519
ENSG00000103653	ENST00000439220	ENSP00000414764	CSK	CSK-002	PRINCIPAL:1	150	M	ATG	TCACCTCCACCAGCTGCATG	chr15	75091819	-	49	86	44	0.332594	6	219	206	13	TRUE	FALSE	7	4	0.571429	-10.348	0.179039	SH2				Library	-0.18	-0.29552	0.175189	0.221658	0.61	0.545519
ENSG00000103653	ENST00000439220	ENSP00000414764	CSK	CSK-002	PRINCIPAL:1	151	Q	CAG	CTTTGAGAACCTCATGCAGC	chr15	75091821	+	52	72	49	0.334812	6	219	208	11	TRUE	FALSE	7	4	0.571429	-11.035	0.168383	SH2				Library	-0.13	-0.305032	0.645919	0.226043	0.34	0.557861
ENSG00000103653	ENST00000439220	ENSP00000414764	CSK	CSK-002	PRINCIPAL:1	151	Q	CAG	TGAGAACCTCATGCAGCTGG	chr15	75091824	+	31	75	47	0.334812	6	219	211	8	TRUE	FALSE	7	4	0.571429	-11.035	0.168383	SH2				Library	-0.46	-0.305032	0.157027	0.226043	0.37	0.557861
ENSG00000103653	ENST00000439220	ENSP00000414764	CSK	CSK-002	PRINCIPAL:1	152	L	CTG	TGAGAACCTCATGCAGCTGG	chr15	75091824	+	31	75	47	0.337029	6	219	211	8	TRUE	FALSE	7	4	0.571429	-11.593	0.194905	SH2				Library	-0.46	-0.311107	0.157027	0.232405	0.37	0.568991
ENSG00000103653	ENST00000439220	ENSP00000414764	CSK	CSK-002	PRINCIPAL:1	152	L	CTG	GAACCTCATGCAGCTGGTGG	chr15	75091827	+	49	78	52	0.337029	6	219	214	5	TRUE	FALSE	7	4	0.571429	-11.593	0.194905	SH2				Library	-0.28	-0.311107	0.189152	0.232405	0.43	0.568991
ENSG00000103653	ENST00000439220	ENSP00000414764	CSK	CSK-002	PRINCIPAL:1	153	V	GTG	GAACCTCATGCAGCTGGTGG	chr15	75091827	+	49	78	52	0.339246	6	219	214	5	TRUE	FALSE	7	4	0.571429	-11.289	0.224795	SH2				Library	-0.28	-0.317286	0.189152	0.238686	0.43	0.580058
ENSG00000103653	ENST00000439220	ENSP00000414764	CSK	CSK-002	PRINCIPAL:1	154	E	GAG								0.341463	6	219			TRUE		7			-11.492	0.247007	SH2				Library		-0.323274		0.244906		0.590897
ENSG00000103653	ENST00000439220	ENSP00000414764	CSK	CSK-002	PRINCIPAL:1	155	H	CAC								0.343681	7	93			TRUE		7			-13.216	0.267141	SH2				Library		-0.329359		0.250555		0.598783
ENSG00000103653	ENST00000439220	ENSP00000414764	CSK	CSK-002	PRINCIPAL:1	156	Y	TAC								0.345898	7	93			TRUE		7			-12.982	0.304495	SH2				Library		-0.335321		0.256249		0.608784
ENSG00000103653	ENST00000439220	ENSP00000414764	CSK	CSK-002	PRINCIPAL:1	157	T	ACC								0.348115	7	93			TRUE		7			-8.128	0.312583	SH2				Library		-0.340446		0.261989		0.618385
ENSG00000103653	ENST00000439220	ENSP00000414764	CSK	CSK-002	PRINCIPAL:1	158	S	TCA	ACAGAGTCCATCTGCGTCTG	chr15	75092765	-	81	72	73	0.350333	7	93	12	81	TRUE	FALSE	7	4	0.571429	-8.123	0.337125	SH2				Library	0.1	-0.344712	0.483354	0.267784	0.88	0.627603
ENSG00000103653	ENST00000439220	ENSP00000414764	CSK	CSK-002	PRINCIPAL:1	159	D	GAC	CACTACACCTCAGACGCAGA	chr15	75092769	+	89	72	79	0.35255	7	93	16	77	TRUE	FALSE	7	4	0.571429	-10.842	0.348814	SH2				Library	-0.65	-0.344036	0.136158	0.274432	0.11	0.638242
ENSG00000103653	ENST00000439220	ENSP00000414764	CSK	CSK-002	PRINCIPAL:1	159	D	GAC	ACAGAGTCCATCTGCGTCTG	chr15	75092765	-	81	72	73	0.35255	7	93	12	81	TRUE	FALSE	7	4	0.571429	-10.842	0.348814	SH2				Library	0.1	-0.344036	0.483354	0.274432	0.88	0.638242
ENSG00000103653	ENST00000439220	ENSP00000414764	CSK	CSK-002	PRINCIPAL:1	160	A	GCA	CACTACACCTCAGACGCAGA	chr15	75092769	+	89	72	79	0.354767	7	93	16	77	TRUE	FALSE	7	4	0.571429	-9.645	0.344402	SH2				Library	-0.65	-0.346507	0.136158	0.279852	0.11	0.646064
ENSG00000103653	ENST00000439220	ENSP00000414764	CSK	CSK-002	PRINCIPAL:1	161	D	GAT								0.356984	7	93			TRUE		7			-10.861	0.305542	SH2				Library		-0.353028		0.284543		0.652069
ENSG00000103653	ENST00000439220	ENSP00000414764	CSK	CSK-002	PRINCIPAL:1	162	G	GGA								0.359202	7	93			TRUE		7			-12.054	0.262593	SH2				Library		-0.359024		0.289191		0.657603
ENSG00000103653	ENST00000439220	ENSP00000414764	CSK	CSK-002	PRINCIPAL:1	163	L	CTC								0.361419	7	93			TRUE		7			-11.194	0.219001	SH2				Library		-0.359599		0.294046		0.663799
ENSG00000103653	ENST00000439220	ENSP00000414764	CSK	CSK-002	PRINCIPAL:1	164	C	TGT								0.363636	7	93			TRUE		7			-15.076	0.175673	SH2				Library		-0.356381		0.298281		0.669421
ENSG00000103653	ENST00000439220	ENSP00000414764	CSK	CSK-002	PRINCIPAL:1	165	T	ACG								0.365854	7	93			TRUE		7			-11.467	0.150994	SH2				Library		-0.356982		0.301949		0.673524
ENSG00000103653	ENST00000439220	ENSP00000414764	CSK	CSK-002	PRINCIPAL:1	166	R	CGC								0.368071	7	93			TRUE		7			-9.436	0.155027	SH2				Library		-0.355367		0.304419		0.675875
ENSG00000103653	ENST00000439220	ENSP00000414764	CSK	CSK-002	PRINCIPAL:1	167	L	CTC	CCATGACCTTTGGTTTAATG	chr15	75092793	-	72	43	68	0.370288	7	93	40	53	TRUE	FALSE	7	4	0.571429	-7.768	0.172598	SH2				Library		-0.354716		0.306093		0.676638
ENSG00000103653	ENST00000439220	ENSP00000414764	CSK	CSK-002	PRINCIPAL:1	168	I	ATT	CCATGACCTTTGGTTTAATG	chr15	75092793	-	72	43	68	0.372506	7	93	40	53	TRUE	FALSE	7	4	0.571429	-6.734	0.192767	SH2				Library		-0.356037		0.308129		0.677954
ENSG00000103653	ENST00000439220	ENSP00000414764	CSK	CSK-002	PRINCIPAL:1	169	K	AAA	TACGCGCCTCATTAAACCAA	chr15	75092798	+	82	86	68	0.374723	7	93	45	48	TRUE	FALSE	7	4	0.571429	-7.83	0.222496	SH2				Library	-0.05	-0.356356	0.243875	0.308561	0.75	0.676436
ENSG00000103653	ENST00000439220	ENSP00000414764	CSK	CSK-002	PRINCIPAL:1	170	P	CCA	TACGCGCCTCATTAAACCAA	chr15	75092798	+	82	86	68	0.37694	7	93	45	48	TRUE	FALSE	7	4	0.571429	-8.561	0.265436	SH2				Library	-0.05	-0.357161	0.243875	0.308097	0.75	0.673408
ENSG00000103653	ENST00000439220	ENSP00000414764	CSK	CSK-002	PRINCIPAL:1	170	P	CCA	ACTGTGCCCTCCATGACCTT	chr15	75092803	-	65	19	65	0.37694	7	93	50	43	TRUE	FALSE	7	4	0.571429	-8.561	0.265436	SH2				Library	-0.35	-0.357161	0.575497	0.308097	0.68	0.673408
ENSG00000103653	ENST00000439220	ENSP00000414764	CSK	CSK-002	PRINCIPAL:1	171	K	AAG	CCTCATTAAACCAAAGGTCA	chr15	75092804	+	58	69	50	0.379157	7	93	51	42	TRUE	FALSE	7	4	0.571429	-6.134	0.288992	SH2				Library	-0.28	-0.35831	0.587269	0.306795	1.96	0.669009
ENSG00000103653	ENST00000439220	ENSP00000414764	CSK	CSK-002	PRINCIPAL:1	171	K	AAG	ACTGTGCCCTCCATGACCTT	chr15	75092803	-	65	19	65	0.379157	7	93	50	43	TRUE	FALSE	7	4	0.571429	-6.134	0.288992	SH2				Library	-0.35	-0.35831	0.575497	0.306795	0.68	0.669009
ENSG00000103653	ENST00000439220	ENSP00000414764	CSK	CSK-002	PRINCIPAL:1	172	V	GTC	CCTCATTAAACCAAAGGTCA	chr15	75092804	+	58	69	50	0.381375	7	93	51	42	TRUE	FALSE	7	4	0.571429	-4.119	0.29689	SH2				Library	-0.28	-0.359661	0.587269	0.30483	1.96	0.663511
ENSG00000103653	ENST00000439220	ENSP00000414764	CSK	CSK-002	PRINCIPAL:1	172	V	GTC	CATTAAACCAAAGGTCATGG	chr15	75092807	+	57	96	46	0.381375	7	93	54	39	TRUE	FALSE	7	4	0.571429	-4.119	0.29689	SH2				Library		-0.359661		0.30483		0.663511
ENSG00000103653	ENST00000439220	ENSP00000414764	CSK	CSK-002	PRINCIPAL:1	172	V	GTC	ATTAAACCAAAGGTCATGGA	chr15	75092808	+	60	92	45	0.381375	7	93	55	38	TRUE	FALSE	7	4	0.571429	-4.119	0.29689	SH2				Library	-0.36	-0.359661	0.36985	0.30483	0.62	0.663511
ENSG00000103653	ENST00000439220	ENSP00000414764	CSK	CSK-002	PRINCIPAL:1	173	M	ATG	CATTAAACCAAAGGTCATGG	chr15	75092807	+	57	96	46	0.383592	7	93	54	39	TRUE	FALSE	7	4	0.571429	-4.786	0.321459	SH2				Library		-0.362093		0.305736		0.664161
ENSG00000103653	ENST00000439220	ENSP00000414764	CSK	CSK-002	PRINCIPAL:1	173	M	ATG	ATTAAACCAAAGGTCATGGA	chr15	75092808	+	60	92	45	0.383592	7	93	55	38	TRUE	FALSE	7	4	0.571429	-4.786	0.321459	SH2				Library	-0.36	-0.362093	0.36985	0.305736	0.62	0.664161
ENSG00000103653	ENST00000439220	ENSP00000414764	CSK	CSK-002	PRINCIPAL:1	174	E	GAG								0.385809	7	93			TRUE		7			-6.312	0.334155	SH2				Library		-0.364252		0.306213		0.665053
ENSG00000103653	ENST00000439220	ENSP00000414764	CSK	CSK-002	PRINCIPAL:1	175	G	GGC	AAAGGTCATGGAGGGCACAG	chr15	75092816	+	38	97	53	0.388027	7	93	63	30	TRUE	FALSE	7	4	0.571429	-7.906	0.309816	SH2				Library	-0.87	-0.365925	0.299315	0.306128	0.61	0.665941
ENSG00000103653	ENST00000439220	ENSP00000414764	CSK	CSK-002	PRINCIPAL:1	176	T	ACA	AAAGGTCATGGAGGGCACAG	chr15	75092816	+	38	97	53	0.390244	7	93	63	30	TRUE	FALSE	7	4	0.571429	-6.205	0.301865	SH2				Library	-0.87	-0.36713	0.299315	0.303799	0.61	0.661724
ENSG00000103653	ENST00000439220	ENSP00000414764	CSK	CSK-002	PRINCIPAL:1	176	T	ACA	GGTCATGGAGGGCACAGTGG	chr15	75092819	+	36	75	53	0.390244	7	93	66	27	TRUE	FALSE	7	4	0.571429	-6.205	0.301865	SH2				Library	-1.45	-0.36713	-0.306134	0.303799	0.46	0.661724
ENSG00000103653	ENST00000439220	ENSP00000414764	CSK	CSK-002	PRINCIPAL:1	177	V	GTG	GGTCATGGAGGGCACAGTGG	chr15	75092819	+	36	75	53	0.392461	7	93	66	27	TRUE	FALSE	7	4	0.571429	-5.513	0.301768	SH2				Library	-1.45	-0.368001	-0.306134	0.302438	0.46	0.6614
ENSG00000103653	ENST00000439220	ENSP00000414764	CSK	CSK-002	PRINCIPAL:1	178	A	GCG	GGAGGGCACAGTGGCGGCCC	chr15	75092825	+	55	25	55	0.394678	7	93	72	21	TRUE	FALSE	7	4	0.571429	-4.523	0.314291	SH2				Library	-0.29	-0.368593	0.314715	0.298984	0.91	0.655259
ENSG00000103653	ENST00000439220	ENSP00000414764	CSK	CSK-002	PRINCIPAL:1	179	A	GCC	GGAGGGCACAGTGGCGGCCC	chr15	75092825	+	55	25	55	0.396896	7	93	72	21	TRUE	FALSE	7	4	0.571429	-4.523	0.315524	SH2				Library	-0.29	-0.368724	0.314715	0.294991	0.91	0.64774
ENSG00000103653	ENST00000439220	ENSP00000414764	CSK	CSK-002	PRINCIPAL:1	180	Q	CAG	ACTGCGGTAGAACTCATCCT	chr15	75092831	-	82	95	55	0.399113	7	93	78	15	TRUE	FALSE	7	4	0.571429	-4.591	0.315327	SH2				Library	-0.55	-0.368947	-0.169516	0.291557	0.55	0.644446
ENSG00000103653	ENST00000439220	ENSP00000414764	CSK	CSK-002	PRINCIPAL:1	180	Q	CAG	CACTGCGGTAGAACTCATCC	chr15	75092832	-	82	59	57	0.399113	7	93	79	14	TRUE	FALSE	7	4	0.571429	-4.591	0.315327	SH2				Library	-0.35	-0.368947	0.138799	0.291557	0.32	0.644446
ENSG00000103653	ENST00000439220	ENSP00000414764	CSK	CSK-002	PRINCIPAL:1	181	D	GAT	ACTGCGGTAGAACTCATCCT	chr15	75092831	-	82	95	55	0.40133	7	93	78	15	TRUE	FALSE	7	4	0.571429	-4.255	0.300408	SH2				Library	-0.55	-0.368992	-0.169516	0.287178	0.55	0.639495
ENSG00000103653	ENST00000439220	ENSP00000414764	CSK	CSK-002	PRINCIPAL:1	181	D	GAT	CACTGCGGTAGAACTCATCC	chr15	75092832	-	82	59	57	0.40133	7	93	79	14	TRUE	FALSE	7	4	0.571429	-4.255	0.300408	SH2				Library	-0.35	-0.368992	0.138799	0.287178	0.32	0.639495
ENSG00000103653	ENST00000439220	ENSP00000414764	CSK	CSK-002	PRINCIPAL:1	182	E	GAG								0.403548	7	93			TRUE		7			-4.027	0.268665	SH2				Library		-0.369088		0.281944		0.632324
ENSG00000103653	ENST00000439220	ENSP00000414764	CSK	CSK-002	PRINCIPAL:1	183	F	TTC								0.405765	7	93			TRUE		7			-5.682	0.220791	SH2				Library		-0.368497		0.275646		0.617932
ENSG00000103653	ENST00000439220	ENSP00000414764	CSK	CSK-002	PRINCIPAL:1	184	Y	TAC								0.407982	7	93			TRUE		7			-4.984	0.194887	SH2				Library		-0.368867		0.26952		0.60611
ENSG00000103653	ENST00000439220	ENSP00000414764	CSK	CSK-002	PRINCIPAL:1	185	R	CGC	GGCCCCTCCCCACAGGCGGC	chr15	75093023	+	44	5	79	0.4102	7	93	1	64	TRUE	FALSE	7	4	0.571429	-7.278	0.173685	SH2				Library	0.33	-0.367715	0.534277	0.262878	0.32	0.58739
ENSG00000103653	ENST00000439220	ENSP00000414764	CSK	CSK-002	PRINCIPAL:1	186	S	AGC	GGCCCCTCCCCACAGGCGGC	chr15	75093023	+	44	5	79	0.412417	8	93	1	64	TRUE	FALSE	7	4	0.571429	-7.181	0.162268	SH2				Library	0.33	-0.366097	0.534277	0.25635	0.32	0.566711
ENSG00000103653	ENST00000439220	ENSP00000414764	CSK	CSK-002	PRINCIPAL:1	186	S	AGC	GCCCCTCCCCACAGGCGGCT	chr15	75093024	+	60	27	80	0.412417	8	93	2	63	TRUE	FALSE	7	4	0.571429	-7.181	0.162268	SH2				Library	-0.29	-0.366097	0.728074	0.25635	0.63	0.566711
ENSG00000103653	ENST00000439220	ENSP00000414764	CSK	CSK-002	PRINCIPAL:1	187	G	GGC	GCCCCTCCCCACAGGCGGCT	chr15	75093024	+	60	27	80	0.414634	8	65	2	63	FALSE	FALSE	7	4	0.571429	-10.961	0.159946	SH2				Library	-0.29	-0.36326	0.728074	0.250036	0.63	0.539702
ENSG00000103653	ENST00000439220	ENSP00000414764	CSK	CSK-002	PRINCIPAL:1	188	W	TGG								0.416851	8	65			FALSE		7			-16.247	0.150057	SH2				Library		-0.361406		0.244473		0.518024
ENSG00000103653	ENST00000439220	ENSP00000414764	CSK	CSK-002	PRINCIPAL:1	189	A	GCC								0.419069	8	65			FALSE		7			-8.962	0.153496	SH2				Library		-0.35928		0.239311		0.499971
ENSG00000103653	ENST00000439220	ENSP00000414764	CSK	CSK-002	PRINCIPAL:1	190	L	CTG	CTTCAGCTCCTTCATGTTCA	chr15	75093036	-	54	25	82	0.421286	8	65	14	51	FALSE	FALSE	7	4	0.571429	-9.717	0.171998	SH2				Library	0.32	-0.356699	0.746306	0.23471	0.79	0.478391
ENSG00000103653	ENST00000439220	ENSP00000414764	CSK	CSK-002	PRINCIPAL:1	190	L	CTG	GCTTCAGCTCCTTCATGTTC	chr15	75093037	-	63	5	74	0.421286	8	65	15	50	FALSE	FALSE	7	4	0.571429	-9.717	0.171998	SH2				Library	-0.14	-0.356699	0.48487	0.23471	0.54	0.478391
ENSG00000103653	ENST00000439220	ENSP00000414764	CSK	CSK-002	PRINCIPAL:1	191	N	AAC	CGGCTGGGCCCTGAACATGA	chr15	75093039	+	65	78	60	0.423503	8	65	17	48	FALSE	FALSE	7	4	0.571429	-9.595	0.21043	SH2				Library	-0.23	-0.354088	-0.0925121	0.230516	0.45	0.457675
ENSG00000103653	ENST00000439220	ENSP00000414764	CSK	CSK-002	PRINCIPAL:1	191	N	AAC	CTTCAGCTCCTTCATGTTCA	chr15	75093036	-	54	25	82	0.423503	8	65	14	51	FALSE	FALSE	7	4	0.571429	-9.595	0.21043	SH2				Library	0.32	-0.354088	0.746306	0.230516	0.79	0.457675
ENSG00000103653	ENST00000439220	ENSP00000414764	CSK	CSK-002	PRINCIPAL:1	191	N	AAC	GCTTCAGCTCCTTCATGTTC	chr15	75093037	-	63	5	74	0.423503	8	65	15	50	FALSE	FALSE	7	4	0.571429	-9.595	0.21043	SH2				Library	-0.14	-0.354088	0.48487	0.230516	0.54	0.457675
ENSG00000103653	ENST00000439220	ENSP00000414764	CSK	CSK-002	PRINCIPAL:1	192	M	ATG	CGGCTGGGCCCTGAACATGA	chr15	75093039	+	65	78	60	0.425721	8	65	17	48	FALSE	FALSE	7	4	0.571429	-7.587	0.216054	SH2				Library	-0.23	-0.349977	-0.0925121	0.226123	0.45	0.437026
ENSG00000103653	ENST00000439220	ENSP00000414764	CSK	CSK-002	PRINCIPAL:1	193	K	AAG								0.427938	8	65			FALSE		7			-8.725	0.225051	SH2				Library		-0.345057		0.221575		0.414376
ENSG00000103653	ENST00000439220	ENSP00000414764	CSK	CSK-002	PRINCIPAL:1	194	E	GAG								0.430155	8	65			FALSE		7			-8.972	0.245483	SH2				Library		-0.339668		0.2171		0.390997
ENSG00000103653	ENST00000439220	ENSP00000414764	CSK	CSK-002	PRINCIPAL:1	195	L	CTG								0.432373	8	65			FALSE		7			-9.812	0.240257	Prot_kinase_dom::Ser-Thr/Tyr_kinase_cat_dom::Tyr_kinase_cat_dom;SH2				Library		-0.334458		0.213101		0.369294
ENSG00000103653	ENST00000439220	ENSP00000414764	CSK	CSK-002	PRINCIPAL:1	196	K	AAG								0.43459	8	65			FALSE		7			-7.847	0.23302	Prot_kinase_dom::Ser-Thr/Tyr_kinase_cat_dom::Tyr_kinase_cat_dom;SH2				Library		-0.332311		0.210451		0.353315
ENSG00000103653	ENST00000439220	ENSP00000414764	CSK	CSK-002	PRINCIPAL:1	197	L	CTG								0.436807	8	65			FALSE		7			-6.57	0.239723	Prot_kinase_dom::Ser-Thr/Tyr_kinase_cat_dom::Tyr_kinase_cat_dom;SH2				Library		-0.33273		0.208538		0.342202
ENSG00000103653	ENST00000439220	ENSP00000414764	CSK	CSK-002	PRINCIPAL:1	198	L	CTG								0.439024	8	65			FALSE		7			-6.57	0.259249	Prot_kinase_dom::Ser-Thr/Tyr_kinase_cat_dom::Tyr_kinase_cat_dom;SH2				Library		-0.333044		0.206539		0.332844
ENSG00000103653	ENST00000439220	ENSP00000414764	CSK	CSK-002	PRINCIPAL:1	199	Q	CAG	CTGAAGCTGCTGCAGACCAT	chr15	75093064	+	54	38	45	0.441242	8	65	42	23	FALSE	FALSE	7	4	0.571429	-8.522	0.256849	Prot_kinase_dom::Ser-Thr/Tyr_kinase_cat_dom::Tyr_kinase_cat_dom;SH2				Library	-0.47	-0.331526	-0.164337	0.20431	0.01	0.322091
ENSG00000103653	ENST00000439220	ENSP00000414764	CSK	CSK-002	PRINCIPAL:1	199	Q	CAG	TGAAGCTGCTGCAGACCATC	chr15	75093065	+	58	40	46	0.441242	8	65	43	22	FALSE	FALSE	7	4	0.571429	-8.522	0.256849	Prot_kinase_dom::Ser-Thr/Tyr_kinase_cat_dom::Tyr_kinase_cat_dom;SH2				Library	-0.52	-0.331526	0.199878	0.20431	0.57	0.322091
ENSG00000103653	ENST00000439220	ENSP00000414764	CSK	CSK-002	PRINCIPAL:1	200	T	ACC	CTGAAGCTGCTGCAGACCAT	chr15	75093064	+	54	38	45	0.443459	8	65	42	23	FALSE	FALSE	7	4	0.571429	-7.255	0.2611	Prot_kinase_dom::Ser-Thr/Tyr_kinase_cat_dom::Tyr_kinase_cat_dom;SH2				Library	-0.47	-0.330235	-0.164337	0.202262	0.01	0.31278
ENSG00000103653	ENST00000439220	ENSP00000414764	CSK	CSK-002	PRINCIPAL:1	200	T	ACC	TGAAGCTGCTGCAGACCATC	chr15	75093065	+	58	40	46	0.443459	8	65	43	22	FALSE	FALSE	7	4	0.571429	-7.255	0.2611	Prot_kinase_dom::Ser-Thr/Tyr_kinase_cat_dom::Tyr_kinase_cat_dom;SH2				Library	-0.52	-0.330235	0.199878	0.202262	0.57	0.31278
ENSG00000103653	ENST00000439220	ENSP00000414764	CSK	CSK-002	PRINCIPAL:1	201	I	ATC	GCTGCTGCAGACCATCGGGA	chr15	75093069	+	78	81	61	0.445676	8	65	47	18	FALSE	FALSE	7	4	0.571429	-10.127	0.269261	Prot_kinase_dom::Ser-Thr/Tyr_kinase_cat_dom::Tyr_kinase_cat_dom;SH2				Library	-1.08	-0.33036	-0.427128	0.20051	-0.08	0.307413
ENSG00000103653	ENST00000439220	ENSP00000414764	CSK	CSK-002	PRINCIPAL:1	201	I	ATC	CTGCTGCAGACCATCGGGAA	chr15	75093070	+	84	46	66	0.445676	8	65	48	17	FALSE	FALSE	7	4	0.571429	-10.127	0.269261	Prot_kinase_dom::Ser-Thr/Tyr_kinase_cat_dom::Tyr_kinase_cat_dom;SH2				Library	0.7	-0.33036	0.590345	0.20051	0.9	0.307413
ENSG00000103653	ENST00000439220	ENSP00000414764	CSK	CSK-002	PRINCIPAL:1	201	I	ATC	TGCTGCAGACCATCGGGAAG	chr15	75093071	+	83	46	60	0.445676	8	65	49	16	FALSE	FALSE	7	4	0.571429	-10.127	0.269261	Prot_kinase_dom::Ser-Thr/Tyr_kinase_cat_dom::Tyr_kinase_cat_dom;SH2				Library	-0.42	-0.33036	0.112368	0.20051	0.23	0.307413
ENSG00000103653	ENST00000439220	ENSP00000414764	CSK	CSK-002	PRINCIPAL:1	201	I	ATC	TCCGAACTCCCCCTTCCCGA	chr15	75093069	-	86	69	44	0.445676	8	65	47	18	FALSE	FALSE	7	4	0.571429	-10.127	0.269261	Prot_kinase_dom::Ser-Thr/Tyr_kinase_cat_dom::Tyr_kinase_cat_dom;SH2				Library	-0.69	-0.33036	0.341999	0.20051	0.26	0.307413
ENSG00000103653	ENST00000439220	ENSP00000414764	CSK	CSK-002	PRINCIPAL:1	202	G	GGG	GCTGCTGCAGACCATCGGGA	chr15	75093069	+	78	81	61	0.447894	8	65	47	18	FALSE	FALSE	7	4	0.571429	-12.701	0.283344	Prot_kinase_dom::Ser-Thr/Tyr_kinase_cat_dom::Tyr_kinase_cat_dom;SH2				Library	-1.08	-0.328336	-0.427128	0.198605	-0.08	0.29812
ENSG00000103653	ENST00000439220	ENSP00000414764	CSK	CSK-002	PRINCIPAL:1	202	G	GGG	CTGCTGCAGACCATCGGGAA	chr15	75093070	+	84	46	66	0.447894	8	65	48	17	FALSE	FALSE	7	4	0.571429	-12.701	0.283344	Prot_kinase_dom::Ser-Thr/Tyr_kinase_cat_dom::Tyr_kinase_cat_dom;SH2				Library	0.7	-0.328336	0.590345	0.198605	0.9	0.29812
ENSG00000103653	ENST00000439220	ENSP00000414764	CSK	CSK-002	PRINCIPAL:1	202	G	GGG	TGCTGCAGACCATCGGGAAG	chr15	75093071	+	83	46	60	0.447894	8	65	49	16	FALSE	FALSE	7	4	0.571429	-12.701	0.283344	Prot_kinase_dom::Ser-Thr/Tyr_kinase_cat_dom::Tyr_kinase_cat_dom;SH2				Library	-0.42	-0.328336	0.112368	0.198605	0.23	0.29812
ENSG00000103653	ENST00000439220	ENSP00000414764	CSK	CSK-002	PRINCIPAL:1	202	G	GGG	GCTGCAGACCATCGGGAAGG	chr15	75093072	+	67	66	60	0.447894	8	65	50	15	FALSE	FALSE	7	4	0.571429	-12.701	0.283344	Prot_kinase_dom::Ser-Thr/Tyr_kinase_cat_dom::Tyr_kinase_cat_dom;SH2				Library	-0.47	-0.328336	0.227	0.198605	0.34	0.29812
ENSG00000103653	ENST00000439220	ENSP00000414764	CSK	CSK-002	PRINCIPAL:1	202	G	GGG	TCCGAACTCCCCCTTCCCGA	chr15	75093069	-	86	69	44	0.447894	8	65	47	18	FALSE	FALSE	7	4	0.571429	-12.701	0.283344	Prot_kinase_dom::Ser-Thr/Tyr_kinase_cat_dom::Tyr_kinase_cat_dom;SH2				Library	-0.69	-0.328336	0.341999	0.198605	0.26	0.29812
ENSG00000103653	ENST00000439220	ENSP00000414764	CSK	CSK-002	PRINCIPAL:1	203	K	AAG	GCTGCAGACCATCGGGAAGG	chr15	75093072	+	67	66	60	0.450111	8	65	50	15	FALSE	FALSE	7	4	0.571429	-10.596	0.294269	Prot_kinase_dom::Ser-Thr/Tyr_kinase_cat_dom::Tyr_kinase_cat_dom;SH2				Library	-0.47	-0.327143	0.227	0.196875	0.34	0.290786
ENSG00000103653	ENST00000439220	ENSP00000414764	CSK	CSK-002	PRINCIPAL:1	204	G	GGG	ACCATCGGGAAGGGGGAGTT	chr15	75093079	+	76	19	65	0.452328	8	65	57	8	FALSE	FALSE	7	4	0.571429	-12.746	0.314718	Prot_kinase_dom::Ser-Thr/Tyr_kinase_cat_dom::Tyr_kinase_cat_dom;SH2				Library	-0.48	-0.32698	0.320708	0.19531	0.57	0.285786
ENSG00000103653	ENST00000439220	ENSP00000414764	CSK	CSK-002	PRINCIPAL:1	205	E	GAG	ACCATCGGGAAGGGGGAGTT	chr15	75093079	+	76	19	65	0.454545	8	65	57	8	FALSE	FALSE	7	4	0.571429	-11.452	0.31733	Prot_kinase_dom::Ser-Thr/Tyr_kinase_cat_dom::Tyr_kinase_cat_dom;SH2				Library	-0.48	-0.327758	0.320708	0.193907	0.57	0.283686
ENSG00000103653	ENST00000439220	ENSP00000414764	CSK	CSK-002	PRINCIPAL:1	205	E	GAG	ATCGGGAAGGGGGAGTTCGG	chr15	75093082	+	78	92	63	0.454545	8	65	60	5	FALSE	FALSE	7	4	0.571429	-11.452	0.31733	Prot_kinase_dom::Ser-Thr/Tyr_kinase_cat_dom::Tyr_kinase_cat_dom;SH2				Library	-0.98	-0.327758	-0.130733	0.193907	-0.04	0.283686
ENSG00000103653	ENST00000439220	ENSP00000414764	CSK	CSK-002	PRINCIPAL:1	206	F	TTC	ATCGGGAAGGGGGAGTTCGG	chr15	75093082	+	78	92	63	0.456763	8	65	60	5	FALSE	FALSE	7	4	0.571429	-12.556	0.293884	Prot_kinase_dom::Ser-Thr/Tyr_kinase_cat_dom::Tyr_kinase_cat_dom;SH2				Library	-0.98	-0.328447	-0.130733	0.193079	-0.04	0.284428
ENSG00000103653	ENST00000439220	ENSP00000414764	CSK	CSK-002	PRINCIPAL:1	207	G	GGA	AATCGCCCAGCATCACGTCT	chr15	75093164	-	83	50	61	0.45898	8	65	0	99	FALSE	FALSE	7	4	0.571429	-12.454	0.29865	Prot_kinase_dom::Ser-Thr/Tyr_kinase_cat_dom::Tyr_kinase_cat_dom;SH2				Library	-0.46	-0.329562	0.186748	0.192203	-0.38	0.284933
ENSG00000103653	ENST00000439220	ENSP00000414764	CSK	CSK-002	PRINCIPAL:1	207	G	GGA	TAATCGCCCAGCATCACGTC	chr15	75093165	-	80	16	60	0.45898	8	65	1	98	FALSE	FALSE	7	4	0.571429	-12.454	0.29865	Prot_kinase_dom::Ser-Thr/Tyr_kinase_cat_dom::Tyr_kinase_cat_dom;SH2				Library	-0.42	-0.329562	-0.0890477	0.192203	0.01	0.284933
ENSG00000103653	ENST00000439220	ENSP00000414764	CSK	CSK-002	PRINCIPAL:1	208	D	GAC	AATCGCCCAGCATCACGTCT	chr15	75093164	-	83	50	61	0.461197	9	65	0	99	FALSE	FALSE	7	4	0.571429	-11.649	0.274925	Prot_kinase_dom::Ser-Thr/Tyr_kinase_cat_dom::Tyr_kinase_cat_dom;SH2				Library	-0.46	-0.331068	0.186748	0.191471	-0.38	0.286461
ENSG00000103653	ENST00000439220	ENSP00000414764	CSK	CSK-002	PRINCIPAL:1	208	D	GAC	TAATCGCCCAGCATCACGTC	chr15	75093165	-	80	16	60	0.461197	9	65	1	98	FALSE	FALSE	7	4	0.571429	-11.649	0.274925	Prot_kinase_dom::Ser-Thr/Tyr_kinase_cat_dom::Tyr_kinase_cat_dom;SH2				Library	-0.42	-0.331068	-0.0890477	0.191471	0.01	0.286461
ENSG00000103653	ENST00000439220	ENSP00000414764	CSK	CSK-002	PRINCIPAL:1	209	V	GTG	TCTGCCCCCAGACGTGATGC	chr15	75093169	+	86	13	54	0.463415	9	99	5	94	TRUE	FALSE	7	4	0.571429	-9.815	0.258589	Prot_kinase_dom::Ser-Thr/Tyr_kinase_cat_dom::Tyr_kinase_cat_dom;SH2				Library	-0.12	-0.334818	0.085854	0.189594	0.27	0.286893
ENSG00000103653	ENST00000439220	ENSP00000414764	CSK	CSK-002	PRINCIPAL:1	209	V	GTG	CTGCCCCCAGACGTGATGCT	chr15	75093170	+	73	50	62	0.463415	9	99	6	93	TRUE	FALSE	7	4	0.571429	-9.815	0.258589	Prot_kinase_dom::Ser-Thr/Tyr_kinase_cat_dom::Tyr_kinase_cat_dom;SH2				Library	0.02	-0.334818	0.633918	0.189594	0.55	0.286893
ENSG00000103653	ENST00000439220	ENSP00000414764	CSK	CSK-002	PRINCIPAL:1	210	M	ATG	TCTGCCCCCAGACGTGATGC	chr15	75093169	+	86	13	54	0.465632	9	99	5	94	TRUE	FALSE	7	4	0.571429	-8.317	0.250402	Prot_kinase_dom::Ser-Thr/Tyr_kinase_cat_dom::Tyr_kinase_cat_dom;SH2				Library	-0.12	-0.340689	0.085854	0.187063	0.27	0.288118
ENSG00000103653	ENST00000439220	ENSP00000414764	CSK	CSK-002	PRINCIPAL:1	210	M	ATG	CTGCCCCCAGACGTGATGCT	chr15	75093170	+	73	50	62	0.465632	9	99	6	93	TRUE	FALSE	7	4	0.571429	-8.317	0.250402	Prot_kinase_dom::Ser-Thr/Tyr_kinase_cat_dom::Tyr_kinase_cat_dom;SH2				Library	0.02	-0.340689	0.633918	0.187063	0.55	0.288118
ENSG00000103653	ENST00000439220	ENSP00000414764	CSK	CSK-002	PRINCIPAL:1	211	L	CTG								0.467849	9	99			TRUE		7			-8.645	0.249828	Prot_kinase_dom::Ser-Thr/Tyr_kinase_cat_dom::Tyr_kinase_cat_dom;SH2				Library		-0.349116		0.183591		0.289954
ENSG00000103653	ENST00000439220	ENSP00000414764	CSK	CSK-002	PRINCIPAL:1	212	G	GGC								0.470067	9	99			TRUE		7			-12.537	0.247607	Prot_kinase_dom::Ser-Thr/Tyr_kinase_cat_dom::Tyr_kinase_cat_dom;SH2				Library		-0.359818		0.179065		0.292053
ENSG00000103653	ENST00000439220	ENSP00000414764	CSK	CSK-002	PRINCIPAL:1	213	D	GAT	GTGATGCTGGGCGATTACCG	chr15	75093182	+	92	92	60	0.472284	9	99	18	81	TRUE	FALSE	7	4	0.571429	-10.044	0.265916	Prot_kinase_dom::Ser-Thr/Tyr_kinase_cat_dom::Tyr_kinase_cat_dom;SH2				Library	0.23	-0.365126	0.504785	0.17775	0.59	0.298075
ENSG00000103653	ENST00000439220	ENSP00000414764	CSK	CSK-002	PRINCIPAL:1	213	D	GAT	TGATGCTGGGCGATTACCGA	chr15	75093183	+	97	91	64	0.472284	9	99	19	80	TRUE	FALSE	7	4	0.571429	-10.044	0.265916	Prot_kinase_dom::Ser-Thr/Tyr_kinase_cat_dom::Tyr_kinase_cat_dom;SH2				Library	-0.42	-0.365126	-0.0761716	0.17775	0.24	0.298075
ENSG00000103653	ENST00000439220	ENSP00000414764	CSK	CSK-002	PRINCIPAL:1	214	Y	TAC	GTGATGCTGGGCGATTACCG	chr15	75093182	+	92	92	60	0.474501	9	99	18	81	TRUE	FALSE	7	4	0.571429	-13.749	0.256763	Prot_kinase_dom::Ser-Thr/Tyr_kinase_cat_dom::Tyr_kinase_cat_dom				Library	0.23	-0.369627	0.504785	0.177069	0.59	0.305263
ENSG00000103653	ENST00000439220	ENSP00000414764	CSK	CSK-002	PRINCIPAL:1	214	Y	TAC	TGATGCTGGGCGATTACCGA	chr15	75093183	+	97	91	64	0.474501	9	99	19	80	TRUE	FALSE	7	4	0.571429	-13.749	0.256763	Prot_kinase_dom::Ser-Thr/Tyr_kinase_cat_dom::Tyr_kinase_cat_dom				Library	-0.42	-0.369627	-0.0761716	0.177069	0.24	0.305263
ENSG00000103653	ENST00000439220	ENSP00000414764	CSK	CSK-002	PRINCIPAL:1	215	R	CGA	TGACGGCGACTTTGTTCCCT	chr15	75093188	-	77	53	60	0.476718	9	99	24	75	TRUE	FALSE	7	4	0.571429	-9.976	0.247666	Prot_kinase_dom::Ser-Thr/Tyr_kinase_cat_dom::Tyr_kinase_cat_dom				Library	-0.49	-0.372906	0.0392759	0.177269	0.03	0.313848
ENSG00000103653	ENST00000439220	ENSP00000414764	CSK	CSK-002	PRINCIPAL:1	216	G	GGG	TGACGGCGACTTTGTTCCCT	chr15	75093188	-	77	53	60	0.478936	9	99	24	75	TRUE	FALSE	7	4	0.571429	-12.088	0.246818	Prot_kinase_dom::Ser-Thr/Tyr_kinase_cat_dom::Tyr_kinase_cat_dom				Library	-0.49	-0.374564	0.0392759	0.178613	0.03	0.324054
ENSG00000103653	ENST00000439220	ENSP00000414764	CSK	CSK-002	PRINCIPAL:1	217	N	AAC								0.481153	9	99			TRUE		7			-9.017	0.240063	Prot_kinase_dom::Ser-Thr/Tyr_kinase_cat_dom::Tyr_kinase_cat_dom				Library		-0.375593		0.18022		0.33359
ENSG00000103653	ENST00000439220	ENSP00000414764	CSK	CSK-002	PRINCIPAL:1	218	K	AAA								0.48337	9	99			TRUE		7			-11.151	0.220044	Prot_kinase_dom::Ser-Thr/Tyr_kinase_cat_dom::Tyr_kinase_cat_dom				Library		-0.371632		0.185869		0.349758
ENSG00000103653	ENST00000439220	ENSP00000414764	CSK	CSK-002	PRINCIPAL:1	219	V	GTC								0.485588	9	99			TRUE		7			-11.634	0.204063	Prot_kinase_dom::Ser-Thr/Tyr_kinase_cat_dom::Tyr_kinase_cat_dom				Library		-0.367552		0.191906		0.366144
ENSG00000103653	ENST00000439220	ENSP00000414764	CSK	CSK-002	PRINCIPAL:1	220	A	GCC								0.487805	9	99			TRUE		7			-11.634	0.211164	Prot_kinase_dom::Ser-Thr/Tyr_kinase_cat_dom::Tyr_kinase_cat_dom				Library		-0.363568		0.197768		0.381454
ENSG00000103653	ENST00000439220	ENSP00000414764	CSK	CSK-002	PRINCIPAL:1	221	V	GTC	GTCGTTCTTAATGCACTTGA	chr15	75093205	-	79	43	43	0.490022	9	99	41	58	TRUE	FALSE	7	4	0.571429	-11.229	0.212582	Prot_kinase_dom::Ser-Thr/Tyr_kinase_cat_dom::Tyr_kinase_cat_dom				Library	-0.2	-0.359867	0.726228	0.203013	0.89	0.395052
ENSG00000103653	ENST00000439220	ENSP00000414764	CSK	CSK-002	PRINCIPAL:1	222	K	AAG	GTCGTTCTTAATGCACTTGA	chr15	75093205	-	79	43	43	0.492239	9	99	41	58	TRUE	FALSE	7	4	0.571429	-11.623	0.218554	Prot_kinase_dom::Ser-Thr/Tyr_kinase_cat_dom::Tyr_kinase_cat_dom				Library	-0.2	-0.355175	0.726228	0.208761	0.89	0.408838
ENSG00000103653	ENST00000439220	ENSP00000414764	CSK	CSK-002	PRINCIPAL:1	223	C	TGC								0.494457	9	99			TRUE		7			-8.717	0.239754	Prot_kinase_dom::Ser-Thr/Tyr_kinase_cat_dom::Tyr_kinase_cat_dom				Library		-0.349687		0.214902		0.422598
ENSG00000103653	ENST00000439220	ENSP00000414764	CSK	CSK-002	PRINCIPAL:1	224	I	ATT								0.496674	9	99			TRUE		7			-8.46	0.255576	Prot_kinase_dom::Ser-Thr/Tyr_kinase_cat_dom::Tyr_kinase_cat_dom				Library		-0.343759		0.221096		0.43619
ENSG00000103653	ENST00000439220	ENSP00000414764	CSK	CSK-002	PRINCIPAL:1	225	K	AAG								0.498891	9	99			TRUE		7			-7.902	0.25585	Prot_kinase_dom::Ser-Thr/Tyr_kinase_cat_dom::Tyr_kinase_cat_dom				Library		-0.334243		0.230606		0.453066
ENSG00000103653	ENST00000439220	ENSP00000414764	CSK	CSK-002	PRINCIPAL:1	226	N	AAC								0.501109	9	99			TRUE		7			-5.232	0.252652	Prot_kinase_dom::Ser-Thr/Tyr_kinase_cat_dom::Tyr_kinase_cat_dom				Library		-0.328217		0.23617		0.466377
ENSG00000103653	ENST00000439220	ENSP00000414764	CSK	CSK-002	PRINCIPAL:1	227	D	GAC								0.503326	9	99			TRUE		7			-7.278	0.24662	Prot_kinase_dom::Ser-Thr/Tyr_kinase_cat_dom::Tyr_kinase_cat_dom				Library		-0.319532		0.244307		0.483541
ENSG00000103653	ENST00000439220	ENSP00000414764	CSK	CSK-002	PRINCIPAL:1	228	A	GCC								0.505543	9	99			TRUE		7			-6.106	0.215185	Prot_kinase_dom::Ser-Thr/Tyr_kinase_cat_dom::Tyr_kinase_cat_dom				Library		-0.312955		0.249933		0.499475
ENSG00000103653	ENST00000439220	ENSP00000414764	CSK	CSK-002	PRINCIPAL:1	229	T	ACT	TAAGAACGACGCCACTGCCC	chr15	75093229	+	86	53	49	0.507761	9	99	65	34	TRUE	FALSE	7	4	0.571429	-6.24	0.216196	Prot_kinase_dom::Ser-Thr/Tyr_kinase_cat_dom::Tyr_kinase_cat_dom				Library	-0.16	-0.310532	0.39185	0.25046	0.74	0.509059
ENSG00000103653	ENST00000439220	ENSP00000414764	CSK	CSK-002	PRINCIPAL:1	229	T	ACT	AGCCAGGAAGGCCTGGGCAG	chr15	75093229	-	17	30	51	0.507761	9	99	65	34	TRUE	FALSE	7	4	0.571429	-6.24	0.216196	Prot_kinase_dom::Ser-Thr/Tyr_kinase_cat_dom::Tyr_kinase_cat_dom				Library	-2.1	-0.310532	-0.491081	0.25046	-0.25	0.509059
ENSG00000103653	ENST00000439220	ENSP00000414764	CSK	CSK-002	PRINCIPAL:1	230	A	GCC	TAAGAACGACGCCACTGCCC	chr15	75093229	+	86	53	49	0.509978	9	99	65	34	TRUE	FALSE	7	4	0.571429	-6.596	0.223078	Prot_kinase_dom::Ser-Thr/Tyr_kinase_cat_dom::Tyr_kinase_cat_dom				Library	-0.16	-0.309295	0.39185	0.248814	0.74	0.516361
ENSG00000103653	ENST00000439220	ENSP00000414764	CSK	CSK-002	PRINCIPAL:1	230	A	GCC	AGCCAGGAAGGCCTGGGCAG	chr15	75093229	-	17	30	51	0.509978	9	99	65	34	TRUE	FALSE	7	4	0.571429	-6.596	0.223078	Prot_kinase_dom::Ser-Thr/Tyr_kinase_cat_dom::Tyr_kinase_cat_dom				Library	-2.1	-0.309295	-0.491081	0.248814	-0.25	0.516361
ENSG00000103653	ENST00000439220	ENSP00000414764	CSK	CSK-002	PRINCIPAL:1	231	Q	CAG	GGCTTCAGCCAGGAAGGCCT	chr15	75093235	-	43	21	49	0.512195	9	99	71	28	TRUE	FALSE	7	4	0.571429	-8.309	0.225448	Prot_kinase_dom::Ser-Thr/Tyr_kinase_cat_dom::Tyr_kinase_cat_dom				Library	0.3	-0.309186	0.256995	0.245001	0.92	0.521098
ENSG00000103653	ENST00000439220	ENSP00000414764	CSK	CSK-002	PRINCIPAL:1	231	Q	CAG	AGGCTTCAGCCAGGAAGGCC	chr15	75093236	-	43	13	53	0.512195	9	99	72	27	TRUE	FALSE	7	4	0.571429	-8.309	0.225448	Prot_kinase_dom::Ser-Thr/Tyr_kinase_cat_dom::Tyr_kinase_cat_dom				Library	0.2	-0.309186	0.469531	0.245001	0.58	0.521098
ENSG00000103653	ENST00000439220	ENSP00000414764	CSK	CSK-002	PRINCIPAL:1	232	A	GCC	CGCCACTGCCCAGGCCTTCC	chr15	75093238	+	38	4	50	0.514412	9	99	74	25	TRUE	FALSE	7	4	0.571429	-8.066	0.226716	Prot_kinase_dom::Ser-Thr/Tyr_kinase_cat_dom::Tyr_kinase_cat_dom				Library	0.05	-0.309803	0.232545	0.243074	0.54	0.528273
ENSG00000103653	ENST00000439220	ENSP00000414764	CSK	CSK-002	PRINCIPAL:1	232	A	GCC	GGCTTCAGCCAGGAAGGCCT	chr15	75093235	-	43	21	49	0.514412	9	99	71	28	TRUE	FALSE	7	4	0.571429	-8.066	0.226716	Prot_kinase_dom::Ser-Thr/Tyr_kinase_cat_dom::Tyr_kinase_cat_dom				Library	0.3	-0.309803	0.256995	0.243074	0.92	0.528273
ENSG00000103653	ENST00000439220	ENSP00000414764	CSK	CSK-002	PRINCIPAL:1	232	A	GCC	AGGCTTCAGCCAGGAAGGCC	chr15	75093236	-	43	13	53	0.514412	9	99	72	27	TRUE	FALSE	7	4	0.571429	-8.066	0.226716	Prot_kinase_dom::Ser-Thr/Tyr_kinase_cat_dom::Tyr_kinase_cat_dom				Library	0.2	-0.309803	0.469531	0.243074	0.58	0.528273
ENSG00000103653	ENST00000439220	ENSP00000414764	CSK	CSK-002	PRINCIPAL:1	233	F	TTC	CGCCACTGCCCAGGCCTTCC	chr15	75093238	+	38	4	50	0.51663	9	99	74	25	TRUE	FALSE	7	4	0.571429	-11.12	0.256213	Prot_kinase_dom::Ser-Thr/Tyr_kinase_cat_dom::Tyr_kinase_cat_dom				Library	0.05	-0.311107	0.232545	0.232152	0.54	0.523395
ENSG00000103653	ENST00000439220	ENSP00000414764	CSK	CSK-002	PRINCIPAL:1	233	F	TTC	GACTGAGGCTTCAGCCAGGA	chr15	75093241	-	39	63	56	0.51663	9	99	77	22	TRUE	FALSE	7	4	0.571429	-11.12	0.256213	Prot_kinase_dom::Ser-Thr/Tyr_kinase_cat_dom::Tyr_kinase_cat_dom				Library	-0.35	-0.311107	0.150264	0.232152	0.37	0.523395
ENSG00000103653	ENST00000439220	ENSP00000414764	CSK	CSK-002	PRINCIPAL:1	234	L	CTG	GACTGAGGCTTCAGCCAGGA	chr15	75093241	-	39	63	56	0.518847	9	99	77	22	TRUE	FALSE	7	4	0.571429	-10.284	0.262606	Prot_kinase_dom::Ser-Thr/Tyr_kinase_cat_dom::Tyr_kinase_cat_dom				Library	-0.35	-0.312375	0.150264	0.224336	0.37	0.522071
ENSG00000103653	ENST00000439220	ENSP00000414764	CSK	CSK-002	PRINCIPAL:1	234	L	CTG	TCATGACTGAGGCTTCAGCC	chr15	75093245	-	54	75	52	0.518847	9	99	81	18	TRUE	FALSE	7	4	0.571429	-10.284	0.262606	Prot_kinase_dom::Ser-Thr/Tyr_kinase_cat_dom::Tyr_kinase_cat_dom				Library	-0.35	-0.312375	0.125659	0.224336	0.68	0.522071
ENSG00000103653	ENST00000439220	ENSP00000414764	CSK	CSK-002	PRINCIPAL:1	235	A	GCT	TCATGACTGAGGCTTCAGCC	chr15	75093245	-	54	75	52	0.521064	9	99	81	18	TRUE	FALSE	7	4	0.571429	-9.915	0.264189	Prot_kinase_dom::Ser-Thr/Tyr_kinase_cat_dom::Tyr_kinase_cat_dom				Library	-0.35	-0.312886	0.125659	0.212603	0.68	0.514719
ENSG00000103653	ENST00000439220	ENSP00000414764	CSK	CSK-002	PRINCIPAL:1	236	E	GAA								0.523282	9	99			TRUE		7			-12.298	0.283498	Prot_kinase_dom::Ser-Thr/Tyr_kinase_cat_dom::Tyr_kinase_cat_dom				Library		-0.314751		0.208549		0.517102
ENSG00000103653	ENST00000439220	ENSP00000414764	CSK	CSK-002	PRINCIPAL:1	237	A	GCC								0.525499	9	99			TRUE		7			-11.267	0.293081	Prot_kinase_dom::Ser-Thr/Tyr_kinase_cat_dom::Tyr_kinase_cat_dom				Library		-0.317084		0.203779		0.518588
ENSG00000103653	ENST00000439220	ENSP00000414764	CSK	CSK-002	PRINCIPAL:1	238	S	TCA	CCCCACTCACGTCATGACTG	chr15	75093256	-	82	89	52	0.527716	9	99	92	7	TRUE	FALSE	7	4	0.571429	-11.031	0.297044	Prot_kinase_dom::Ser-Thr/Tyr_kinase_cat_dom::Tyr_kinase_cat_dom				Library	-0.17	-0.319725	0.555482	0.198187	0.58	0.518562
ENSG00000103653	ENST00000439220	ENSP00000414764	CSK	CSK-002	PRINCIPAL:1	239	V	GTC	CCCCACTCACGTCATGACTG	chr15	75093256	-	82	89	52	0.529933	9	99	92	7	TRUE	FALSE	7	4	0.571429	-11.354	0.308803	Prot_kinase_dom::Ser-Thr/Tyr_kinase_cat_dom::Tyr_kinase_cat_dom				Library	-0.17	-0.322148	0.555482	0.191803	0.58	0.516077
ENSG00000103653	ENST00000439220	ENSP00000414764	CSK	CSK-002	PRINCIPAL:1	240	M	ATG	TTGCTATGCCGCAGTTGCCT	chr15	75093353	-	82	21	81	0.532151	9	99	0	90	TRUE	FALSE	7	4	0.571429	-12.646	0.323719	Prot_kinase_dom::Ser-Thr/Tyr_kinase_cat_dom::Tyr_kinase_cat_dom				Library	-0.74	-0.322544	0.0736222	0.183243	0.54	0.508331
ENSG00000103653	ENST00000439220	ENSP00000414764	CSK	CSK-002	PRINCIPAL:1	241	T	ACG	CGTCCTGCCCCAGGCAACTG	chr15	75093356	+	58	78	57	0.534368	10	99	3	87	TRUE	FALSE	7	4	0.571429	-12.512	0.33347	Prot_kinase_dom::Ser-Thr/Tyr_kinase_cat_dom::Tyr_kinase_cat_dom				Library	-0.39	-0.322384	0.282571	0.175294	0.62	0.499846
ENSG00000103653	ENST00000439220	ENSP00000414764	CSK	CSK-002	PRINCIPAL:1	241	T	ACG	TTGCTATGCCGCAGTTGCCT	chr15	75093353	-	82	21	81	0.534368	10	99	0	90	TRUE	FALSE	7	4	0.571429	-12.512	0.33347	Prot_kinase_dom::Ser-Thr/Tyr_kinase_cat_dom::Tyr_kinase_cat_dom				Library	-0.74	-0.322384	0.0736222	0.175294	0.54	0.499846
ENSG00000103653	ENST00000439220	ENSP00000414764	CSK	CSK-002	PRINCIPAL:1	241	T	ACG	GTTGCTATGCCGCAGTTGCC	chr15	75093354	-	84	4	81	0.534368	10	99	1	89	TRUE	FALSE	7	4	0.571429	-12.512	0.33347	Prot_kinase_dom::Ser-Thr/Tyr_kinase_cat_dom::Tyr_kinase_cat_dom				Library	0.09	-0.322384	0.373478	0.175294	0.76	0.499846
ENSG00000103653	ENST00000439220	ENSP00000414764	CSK	CSK-002	PRINCIPAL:1	242	Q	CAA	CGTCCTGCCCCAGGCAACTG	chr15	75093356	+	58	78	57	0.536585	10	90	3	87	TRUE	FALSE	7	4	0.571429	-9.973	0.332221	Prot_kinase_dom::Ser-Thr/Tyr_kinase_cat_dom::Tyr_kinase_cat_dom				Library	-0.39	-0.32088	0.282571	0.168996	0.62	0.49126
ENSG00000103653	ENST00000439220	ENSP00000414764	CSK	CSK-002	PRINCIPAL:1	242	Q	CAA	GTTGCTATGCCGCAGTTGCC	chr15	75093354	-	84	4	81	0.536585	10	90	1	89	TRUE	FALSE	7	4	0.571429	-9.973	0.332221	Prot_kinase_dom::Ser-Thr/Tyr_kinase_cat_dom::Tyr_kinase_cat_dom				Library	0.09	-0.32088	0.373478	0.168996	0.76	0.49126
ENSG00000103653	ENST00000439220	ENSP00000414764	CSK	CSK-002	PRINCIPAL:1	243	L	CTG								0.538803	10	90			TRUE		7			-11.597	0.329835	Prot_kinase_dom::Ser-Thr/Tyr_kinase_cat_dom::Tyr_kinase_cat_dom				Library		-0.318754		0.165464		0.485068
ENSG00000103653	ENST00000439220	ENSP00000414764	CSK	CSK-002	PRINCIPAL:1	244	R	CGG								0.54102	10	90			TRUE		7			-11.558	0.31959	Prot_kinase_dom::Ser-Thr/Tyr_kinase_cat_dom::Tyr_kinase_cat_dom				Library		-0.316945		0.16129		0.478015
ENSG00000103653	ENST00000439220	ENSP00000414764	CSK	CSK-002	PRINCIPAL:1	245	H	CAT								0.543237	10	90			TRUE		7			-15.674	0.298518	Prot_kinase_dom::Ser-Thr/Tyr_kinase_cat_dom::Tyr_kinase_cat_dom				Library		-0.313832		0.161647		0.474377
ENSG00000103653	ENST00000439220	ENSP00000414764	CSK	CSK-002	PRINCIPAL:1	246	S	AGC	GCAACTGCGGCATAGCAACC	chr15	75093369	+	86	56	57	0.545455	10	90	16	74	TRUE	FALSE	7	4	0.571429	-9.31	0.256271	Prot_kinase_dom::Ser-Thr/Tyr_kinase_cat_dom::Tyr_kinase_cat_dom				Library	-0.55	-0.310455	0.105363	0.163969	0.22	0.471779
ENSG00000103653	ENST00000439220	ENSP00000414764	CSK	CSK-002	PRINCIPAL:1	247	N	AAC	GCAACTGCGGCATAGCAACC	chr15	75093369	+	86	56	57	0.547672	10	90	16	74	TRUE	FALSE	7	4	0.571429	-13.197	0.217055	Prot_kinase_dom::Ser-Thr/Tyr_kinase_cat_dom::Tyr_kinase_cat_dom				Library	-0.55	-0.307231	0.105363	0.16745	0.22	0.469759
ENSG00000103653	ENST00000439220	ENSP00000414764	CSK	CSK-002	PRINCIPAL:1	248	L	CTG	TCACGCCCAGGAGCTGCACC	chr15	75093376	-	57	72	54	0.549889	10	90	23	67	TRUE	FALSE	7	4	0.571429	-12.217	0.179312	Prot_kinase_dom::Ser-Thr/Tyr_kinase_cat_dom::Tyr_kinase_cat_dom				Library	-0.4	-0.304393	0.0245011	0.171524	-0.14	0.467997
ENSG00000103653	ENST00000439220	ENSP00000414764	CSK	CSK-002	PRINCIPAL:1	249	V	GTG	TCACGCCCAGGAGCTGCACC	chr15	75093376	-	57	72	54	0.552106	10	90	23	67	TRUE	FALSE	7	4	0.571429	-12.173	0.151568	Prot_kinase_dom::Ser-Thr/Tyr_kinase_cat_dom::Tyr_kinase_cat_dom				Library	-0.4	-0.301364	0.0245011	0.17216	-0.14	0.46195
ENSG00000103653	ENST00000439220	ENSP00000414764	CSK	CSK-002	PRINCIPAL:1	250	Q	CAG	TAGCAACCTGGTGCAGCTCC	chr15	75093381	+	61	9	46	0.554324	10	90	28	62	TRUE	FALSE	7	4	0.571429	-11.674	0.123763	Prot_kinase_dom::Ser-Thr/Tyr_kinase_cat_dom::Tyr_kinase_cat_dom				Library	-0.27	-0.297889	-0.125333	0.173517	0.54	0.455812
ENSG00000103653	ENST00000439220	ENSP00000414764	CSK	CSK-002	PRINCIPAL:1	250	Q	CAG	AGCAACCTGGTGCAGCTCCT	chr15	75093382	+	54	40	48	0.554324	10	90	29	61	TRUE	FALSE	7	4	0.571429	-11.674	0.123763	Prot_kinase_dom::Ser-Thr/Tyr_kinase_cat_dom::Tyr_kinase_cat_dom				Library	-0.32	-0.297889	0.219986	0.173517	0.72	0.455812
ENSG00000103653	ENST00000439220	ENSP00000414764	CSK	CSK-002	PRINCIPAL:1	251	L	CTC	TAGCAACCTGGTGCAGCTCC	chr15	75093381	+	61	9	46	0.556541	10	90	28	62	TRUE	FALSE	7	4	0.571429	-11.354	0.114333	Prot_kinase_dom::Ser-Thr/Tyr_kinase_cat_dom::Tyr_kinase_cat_dom				Library	-0.27	-0.294216	-0.125333	0.175734	0.54	0.449881
ENSG00000103653	ENST00000439220	ENSP00000414764	CSK	CSK-002	PRINCIPAL:1	251	L	CTC	AGCAACCTGGTGCAGCTCCT	chr15	75093382	+	54	40	48	0.556541	10	90	29	61	TRUE	FALSE	7	4	0.571429	-11.354	0.114333	Prot_kinase_dom::Ser-Thr/Tyr_kinase_cat_dom::Tyr_kinase_cat_dom				Library	-0.32	-0.294216	0.219986	0.175734	0.72	0.449881
ENSG00000103653	ENST00000439220	ENSP00000414764	CSK	CSK-002	PRINCIPAL:1	252	L	CTG	TCTCCTCCACGATCACGCCC	chr15	75093388	-	47	59	48	0.558758	10	90	35	55	TRUE	FALSE	7	4	0.571429	-11.354	0.112412	Prot_kinase_dom::Ser-Thr/Tyr_kinase_cat_dom::Tyr_kinase_cat_dom				Library		-0.290756		0.178847		0.444362
ENSG00000103653	ENST00000439220	ENSP00000414764	CSK	CSK-002	PRINCIPAL:1	253	G	GGC	TCTCCTCCACGATCACGCCC	chr15	75093388	-	47	59	48	0.560976	10	90	35	55	TRUE	FALSE	7	4	0.571429	-11.488	0.1131	Prot_kinase_dom::Ser-Thr/Tyr_kinase_cat_dom::Tyr_kinase_cat_dom				Library		-0.287961		0.182779		0.439315
ENSG00000103653	ENST00000439220	ENSP00000414764	CSK	CSK-002	PRINCIPAL:1	254	V	GTG	GCAGCTCCTGGGCGTGATCG	chr15	75093393	+	85	69	39	0.563193	10	90	40	50	TRUE	FALSE	7	4	0.571429	-5.724	0.119458	Prot_kinase_dom::Ser-Thr/Tyr_kinase_cat_dom::Tyr_kinase_cat_dom				Library	0.08	-0.288483	0.47222	0.190137	0.8	0.437391
ENSG00000103653	ENST00000439220	ENSP00000414764	CSK	CSK-002	PRINCIPAL:1	255	I	ATC	GCAGCTCCTGGGCGTGATCG	chr15	75093393	+	85	69	39	0.56541	10	90	40	50	TRUE	FALSE	7	4	0.571429	-5.313	0.139387	Prot_kinase_dom::Ser-Thr/Tyr_kinase_cat_dom::Tyr_kinase_cat_dom				Library	0.08	-0.290429	0.47222	0.196931	0.8	0.434361
ENSG00000103653	ENST00000439220	ENSP00000414764	CSK	CSK-002	PRINCIPAL:1	255	I	ATC	GCTCCTGGGCGTGATCGTGG	chr15	75093396	+	83	92	45	0.56541	10	90	43	47	TRUE	FALSE	7	4	0.571429	-5.313	0.139387	Prot_kinase_dom::Ser-Thr/Tyr_kinase_cat_dom::Tyr_kinase_cat_dom				Library	-0.3	-0.290429	0.301526	0.196931	0.23	0.434361
ENSG00000103653	ENST00000439220	ENSP00000414764	CSK	CSK-002	PRINCIPAL:1	256	V	GTG	GCTCCTGGGCGTGATCGTGG	chr15	75093396	+	83	92	45	0.567627	10	90	43	47	TRUE	FALSE	7	4	0.571429	-5.409	0.160085	Prot_kinase_dom::Ser-Thr/Tyr_kinase_cat_dom::Tyr_kinase_cat_dom				Library	-0.3	-0.290784	0.301526	0.201363	0.23	0.428951
ENSG00000103653	ENST00000439220	ENSP00000414764	CSK	CSK-002	PRINCIPAL:1	257	E	GAG	GGGCGTGATCGTGGAGGAGA	chr15	75093402	+	41	35	51	0.569845	10	90	49	41	TRUE	FALSE	7	4	0.571429	-3.506	0.187	Prot_kinase_dom::Ser-Thr/Tyr_kinase_cat_dom::Tyr_kinase_cat_dom				Library		-0.290089		0.204539		0.422761
ENSG00000103653	ENST00000439220	ENSP00000414764	CSK	CSK-002	PRINCIPAL:1	257	E	GAG	GGCGTGATCGTGGAGGAGAA	chr15	75093403	+	60	69	54	0.569845	10	90	50	40	TRUE	FALSE	7	4	0.571429	-3.506	0.187	Prot_kinase_dom::Ser-Thr/Tyr_kinase_cat_dom::Tyr_kinase_cat_dom				Library	-0.19	-0.290089	0.121284	0.204539	0.32	0.422761
ENSG00000103653	ENST00000439220	ENSP00000414764	CSK	CSK-002	PRINCIPAL:1	258	E	GAG	GGGCGTGATCGTGGAGGAGA	chr15	75093402	+	41	35	51	0.572062	10	90	49	41	TRUE	FALSE	7	4	0.571429	-3.506	0.219837	Prot_kinase_dom::Ser-Thr/Tyr_kinase_cat_dom::Tyr_kinase_cat_dom				Library		-0.29279		0.209369		0.418358
ENSG00000103653	ENST00000439220	ENSP00000414764	CSK	CSK-002	PRINCIPAL:1	258	E	GAG	GGCGTGATCGTGGAGGAGAA	chr15	75093403	+	60	69	54	0.572062	10	90	50	40	TRUE	FALSE	7	4	0.571429	-3.506	0.219837	Prot_kinase_dom::Ser-Thr/Tyr_kinase_cat_dom::Tyr_kinase_cat_dom				Library	-0.19	-0.29279	0.121284	0.209369	0.32	0.418358
ENSG00000103653	ENST00000439220	ENSP00000414764	CSK	CSK-002	PRINCIPAL:1	258	E	GAG	GTGATCGTGGAGGAGAAGGG	chr15	75093406	+	36	69	55	0.572062	10	90	53	37	TRUE	FALSE	7	4	0.571429	-3.506	0.219837	Prot_kinase_dom::Ser-Thr/Tyr_kinase_cat_dom::Tyr_kinase_cat_dom				Library	-0.75	-0.29279	-0.274028	0.209369	0.04	0.418358
ENSG00000103653	ENST00000439220	ENSP00000414764	CSK	CSK-002	PRINCIPAL:1	258	E	GAG	TGATCGTGGAGGAGAAGGGC	chr15	75093407	+	43	56	61	0.572062	10	90	54	36	TRUE	FALSE	7	4	0.571429	-3.506	0.219837	Prot_kinase_dom::Ser-Thr/Tyr_kinase_cat_dom::Tyr_kinase_cat_dom				Library	-0.29	-0.29279	-0.210438	0.209369	0.31	0.418358
ENSG00000103653	ENST00000439220	ENSP00000414764	CSK	CSK-002	PRINCIPAL:1	259	K	AAG	GTGATCGTGGAGGAGAAGGG	chr15	75093406	+	36	69	55	0.574279	10	90	53	37	TRUE	FALSE	7	4	0.571429	-2.36	0.220616	Prot_kinase_dom::Ser-Thr/Tyr_kinase_cat_dom::Tyr_kinase_cat_dom				Library	-0.75	-0.294874	-0.274028	0.213346	0.04	0.414362
ENSG00000103653	ENST00000439220	ENSP00000414764	CSK	CSK-002	PRINCIPAL:1	259	K	AAG	TGATCGTGGAGGAGAAGGGC	chr15	75093407	+	43	56	61	0.574279	10	90	54	36	TRUE	FALSE	7	4	0.571429	-2.36	0.220616	Prot_kinase_dom::Ser-Thr/Tyr_kinase_cat_dom::Tyr_kinase_cat_dom				Library	-0.29	-0.294874	-0.210438	0.213346	0.31	0.414362
ENSG00000103653	ENST00000439220	ENSP00000414764	CSK	CSK-002	PRINCIPAL:1	260	G	GGC								0.576497	10	90			TRUE		7			-2.164	0.205094	Prot_kinase_dom::Ser-Thr/Tyr_kinase_cat_dom::Tyr_kinase_cat_dom				Library		-0.299328		0.218006		0.411
ENSG00000103653	ENST00000439220	ENSP00000414764	CSK	CSK-002	PRINCIPAL:1	261	G	GGG								0.578714	10	90			TRUE		7			-2.164	0.18835	Prot_kinase_dom::Ser-Thr/Tyr_kinase_cat_dom::Tyr_kinase_cat_dom				Library		-0.305983		0.222923		0.40782
ENSG00000103653	ENST00000439220	ENSP00000414764	CSK	CSK-002	PRINCIPAL:1	262	L	CTC								0.580931	10	90			TRUE		7			-6.461	0.165375	Prot_kinase_dom::Ser-Thr/Tyr_kinase_cat_dom::Tyr_kinase_cat_dom				Library		-0.313034		0.227315		0.40547
ENSG00000103653	ENST00000439220	ENSP00000414764	CSK	CSK-002	PRINCIPAL:1	263	Y	TAC								0.583149	10	90			TRUE		7			-8.925	0.132821	Prot_kinase_dom::Ser-Thr/Tyr_kinase_cat_dom::Tyr_kinase_cat_dom				Library		-0.319774		0.230907		0.403692
ENSG00000103653	ENST00000439220	ENSP00000414764	CSK	CSK-002	PRINCIPAL:1	264	I	ATC								0.585366	10	90			TRUE		7			-9.624	0.132015	Prot_kinase_dom::Ser-Thr/Tyr_kinase_cat_dom::Tyr_kinase_cat_dom				Library		-0.325892		0.233677		0.402177
ENSG00000103653	ENST00000439220	ENSP00000414764	CSK	CSK-002	PRINCIPAL:1	265	V	GTC								0.587583	10	90			TRUE		7			-9.606	0.139805	Prot_kinase_dom::Ser-Thr/Tyr_kinase_cat_dom::Tyr_kinase_cat_dom				Library		-0.330749		0.235971		0.400274
ENSG00000103653	ENST00000439220	ENSP00000414764	CSK	CSK-002	PRINCIPAL:1	266	T	ACT								0.5898	10	90			TRUE		7			-10.929	0.142821	Prot_kinase_dom::Ser-Thr/Tyr_kinase_cat_dom::Tyr_kinase_cat_dom				Library		-0.335975		0.237636		0.399115
ENSG00000103653	ENST00000439220	ENSP00000414764	CSK	CSK-002	PRINCIPAL:1	267	E	GAG	CTACATCGTCACTGAGTACA	chr15	75093432	+	69	46	57	0.592018	10	90	79	11	TRUE	FALSE	7	4	0.571429	-12.602	0.146354	Prot_kinase_dom::Ser-Thr/Tyr_kinase_cat_dom::Tyr_kinase_cat_dom				Library	-0.3	-0.340503	0.344248	0.239284	0.22	0.397552
ENSG00000103653	ENST00000439220	ENSP00000414764	CSK	CSK-002	PRINCIPAL:1	268	Y	TAC	CTACATCGTCACTGAGTACA	chr15	75093432	+	69	46	57	0.594235	10	90	79	11	TRUE	FALSE	7	4	0.571429	-12.973	0.157333	Prot_kinase_dom::Ser-Thr/Tyr_kinase_cat_dom::Tyr_kinase_cat_dom				Library	-0.3	-0.344907	0.344248	0.241243	0.22	0.395498
ENSG00000103653	ENST00000439220	ENSP00000414764	CSK	CSK-002	PRINCIPAL:1	269	M	ATG	CGTCACTGAGTACATGGCCA	chr15	75093438	+	63	91	54	0.596452	10	90	85	5	TRUE	FALSE	7	4	0.571429	-12.849	0.162136	Prot_kinase_dom::Ser-Thr/Tyr_kinase_cat_dom::Tyr_kinase_cat_dom				Library	-0.16	-0.349491	0.551236	0.243186	0.46	0.393582
ENSG00000103653	ENST00000439220	ENSP00000414764	CSK	CSK-002	PRINCIPAL:1	270	A	GCC	CGTCACTGAGTACATGGCCA	chr15	75093438	+	63	91	54	0.59867	10	90	85	5	TRUE	FALSE	7	4	0.571429	-10.652	0.179312	Prot_kinase_dom::Ser-Thr/Tyr_kinase_cat_dom::Tyr_kinase_cat_dom				Library	-0.16	-0.354065	0.551236	0.244591	0.46	0.392539
ENSG00000103653	ENST00000439220	ENSP00000414764	CSK	CSK-002	PRINCIPAL:1	270	A	GCC	CACTGAGTACATGGCCAAGG	chr15	75093441	+	59	75	56	0.59867	10	90	88	2	TRUE	FALSE	7	4	0.571429	-10.652	0.179312	Prot_kinase_dom::Ser-Thr/Tyr_kinase_cat_dom::Tyr_kinase_cat_dom				Library	-0.07	-0.354065	0.437481	0.244591	0.53	0.392539
ENSG00000103653	ENST00000439220	ENSP00000414764	CSK	CSK-002	PRINCIPAL:1	270	A	GCC	ACTGAGTACATGGCCAAGGT	chr15	75093442	+	54	92	56	0.59867	10	90	89	1	TRUE	FALSE	7	4	0.571429	-10.652	0.179312	Prot_kinase_dom::Ser-Thr/Tyr_kinase_cat_dom::Tyr_kinase_cat_dom				Library	-0.41	-0.354065	0.264532	0.244591	0.56	0.392539
ENSG00000103653	ENST00000439220	ENSP00000414764	CSK	CSK-002	PRINCIPAL:1	271	K	AAG	CACTGAGTACATGGCCAAGG	chr15	75093441	+	59	75	56	0.600887	10	90	88	2	TRUE	FALSE	7	4	0.571429	-12.821	0.222477	Prot_kinase_dom::Ser-Thr/Tyr_kinase_cat_dom::Tyr_kinase_cat_dom				Library	-0.07	-0.358581	0.437481	0.247196	0.53	0.391439
ENSG00000103653	ENST00000439220	ENSP00000414764	CSK	CSK-002	PRINCIPAL:1	271	K	AAG	ACTGAGTACATGGCCAAGGT	chr15	75093442	+	54	92	56	0.600887	10	90	89	1	TRUE	FALSE	7	4	0.571429	-12.821	0.222477	Prot_kinase_dom::Ser-Thr/Tyr_kinase_cat_dom::Tyr_kinase_cat_dom				Library	-0.41	-0.358581	0.264532	0.247196	0.56	0.391439
ENSG00000103653	ENST00000439220	ENSP00000414764	CSK	CSK-002	PRINCIPAL:1	271	K	AAG	GTAGTCCACAAGGCTCCCCT	chr15	75093863	-	72	32	62	0.600887	10	90	0	73	TRUE	FALSE	7	4	0.571429	-12.821	0.222477	Prot_kinase_dom::Ser-Thr/Tyr_kinase_cat_dom::Tyr_kinase_cat_dom				Library	-0.41	-0.358581	0.243464	0.247196	0.51	0.391439
ENSG00000103653	ENST00000439220	ENSP00000414764	CSK	CSK-002	PRINCIPAL:1	271	K	AAG	GGTAGTCCACAAGGCTCCCC	chr15	75093864	-	75	18	63	0.600887	10	90	1	72	TRUE	FALSE	7	4	0.571429	-12.821	0.222477	Prot_kinase_dom::Ser-Thr/Tyr_kinase_cat_dom::Tyr_kinase_cat_dom				Library	-0.14	-0.358581	0.229015	0.247196	0.56	0.391439
ENSG00000103653	ENST00000439220	ENSP00000414764	CSK	CSK-002	PRINCIPAL:1	272	G	GGG	GTAGTCCACAAGGCTCCCCT	chr15	75093863	-	72	32	62	0.603104	11	73	0	73	FALSE	FALSE	7	4	0.571429	-13.392	0.253638	Prot_kinase_dom::Ser-Thr/Tyr_kinase_cat_dom::Tyr_kinase_cat_dom				Library	-0.41	-0.362796	0.243464	0.250847	0.51	0.39125
ENSG00000103653	ENST00000439220	ENSP00000414764	CSK	CSK-002	PRINCIPAL:1	272	G	GGG	GGTAGTCCACAAGGCTCCCC	chr15	75093864	-	75	18	63	0.603104	11	73	1	72	FALSE	FALSE	7	4	0.571429	-13.392	0.253638	Prot_kinase_dom::Ser-Thr/Tyr_kinase_cat_dom::Tyr_kinase_cat_dom				Library	-0.14	-0.362796	0.229015	0.250847	0.56	0.39125
ENSG00000103653	ENST00000439220	ENSP00000414764	CSK	CSK-002	PRINCIPAL:1	273	S	AGC	CTGCCCCCAGGGGAGCCTTG	chr15	75093869	+	35	40	69	0.605322	11	73	6	67	FALSE	FALSE	7	4	0.571429	-10.628	0.271042	Prot_kinase_dom::Ser-Thr/Tyr_kinase_cat_dom::Tyr_kinase_cat_dom				Library	-0.76	-0.36655	0.967738	0.255622	0.59	0.392174
ENSG00000103653	ENST00000439220	ENSP00000414764	CSK	CSK-002	PRINCIPAL:1	274	L	CTT	CTGCCCCCAGGGGAGCCTTG	chr15	75093869	+	35	40	69	0.607539	11	73	6	67	FALSE	FALSE	7	4	0.571429	-11.52	0.304392	Prot_kinase_dom::Ser-Thr/Tyr_kinase_cat_dom::Tyr_kinase_cat_dom				Library	-0.76	-0.370081	0.967738	0.261095	0.59	0.394075
ENSG00000103653	ENST00000439220	ENSP00000414764	CSK	CSK-002	PRINCIPAL:1	274	L	CTT	TAGACCGCAGGTAGTCCACA	chr15	75093873	-	86	97	65	0.607539	11	73	10	63	FALSE	FALSE	7	4	0.571429	-11.52	0.304392	Prot_kinase_dom::Ser-Thr/Tyr_kinase_cat_dom::Tyr_kinase_cat_dom				Library		-0.370081		0.261095		0.394075
ENSG00000103653	ENST00000439220	ENSP00000414764	CSK	CSK-002	PRINCIPAL:1	275	V	GTG	TAGACCGCAGGTAGTCCACA	chr15	75093873	-	86	97	65	0.609756	11	73	10	63	FALSE	FALSE	7	4	0.571429	-11.405	0.338491	Prot_kinase_dom::Ser-Thr/Tyr_kinase_cat_dom::Tyr_kinase_cat_dom				Library		-0.374239		0.260596		0.3945
ENSG00000103653	ENST00000439220	ENSP00000414764	CSK	CSK-002	PRINCIPAL:1	276	D	GAC	GGAGCCTTGTGGACTACCTG	chr15	75093880	+	53	89	69	0.611973	11	73	17	56	FALSE	FALSE	7	4	0.571429	-11.95	0.34469	Prot_kinase_dom::Ser-Thr/Tyr_kinase_cat_dom::Tyr_kinase_cat_dom				Library	0.16	-0.3777	0.277628	0.258989	0.82	0.39463
ENSG00000103653	ENST00000439220	ENSP00000414764	CSK	CSK-002	PRINCIPAL:1	277	Y	TAC	GGAGCCTTGTGGACTACCTG	chr15	75093880	+	53	89	69	0.614191	11	73	17	56	FALSE	FALSE	7	4	0.571429	-13.702	0.365197	Prot_kinase_dom::Ser-Thr/Tyr_kinase_cat_dom::Tyr_kinase_cat_dom				Library	0.16	-0.381378	0.277628	0.259827	0.82	0.39558
ENSG00000103653	ENST00000439220	ENSP00000414764	CSK	CSK-002	PRINCIPAL:1	278	L	CTG	TTGTGGACTACCTGCGGTCT	chr15	75093886	+	90	14	63	0.616408	11	73	23	50	FALSE	FALSE	7	4	0.571429	-11.953	0.401894	Prot_kinase_dom::Ser-Thr/Tyr_kinase_cat_dom::Tyr_kinase_cat_dom				Library	0.11	-0.384968	0.377155	0.255951	0.83	0.394546
ENSG00000103653	ENST00000439220	ENSP00000414764	CSK	CSK-002	PRINCIPAL:1	278	L	CTG	CTGACCGACCCCTAGACCGC	chr15	75093885	-	93	78	74	0.616408	11	73	22	51	FALSE	FALSE	7	4	0.571429	-11.953	0.401894	Prot_kinase_dom::Ser-Thr/Tyr_kinase_cat_dom::Tyr_kinase_cat_dom				Library	-0.91	-0.384968	-0.138052	0.255951	-0.19	0.394546
ENSG00000103653	ENST00000439220	ENSP00000414764	CSK	CSK-002	PRINCIPAL:1	279	R	CGG	TTGTGGACTACCTGCGGTCT	chr15	75093886	+	90	14	63	0.618625	11	73	23	50	FALSE	FALSE	7	4	0.571429	-12.77	0.415119	Prot_kinase_dom::Ser-Thr/Tyr_kinase_cat_dom::Tyr_kinase_cat_dom				Library	0.11	-0.389492	0.377155	0.254899	0.83	0.394492
ENSG00000103653	ENST00000439220	ENSP00000414764	CSK	CSK-002	PRINCIPAL:1	279	R	CGG	TGTGGACTACCTGCGGTCTA	chr15	75093887	+	95	27	64	0.618625	11	73	24	49	FALSE	FALSE	7	4	0.571429	-12.77	0.415119	Prot_kinase_dom::Ser-Thr/Tyr_kinase_cat_dom::Tyr_kinase_cat_dom				Library		-0.389492		0.254899		0.394492
ENSG00000103653	ENST00000439220	ENSP00000414764	CSK	CSK-002	PRINCIPAL:1	279	R	CGG	GTGGACTACCTGCGGTCTAG	chr15	75093888	+	89	81	68	0.618625	11	73	25	48	FALSE	FALSE	7	4	0.571429	-12.77	0.415119	Prot_kinase_dom::Ser-Thr/Tyr_kinase_cat_dom::Tyr_kinase_cat_dom				Library	-0.55	-0.389492	0.212988	0.254899	0.25	0.394492
ENSG00000103653	ENST00000439220	ENSP00000414764	CSK	CSK-002	PRINCIPAL:1	279	R	CGG	CTGACCGACCCCTAGACCGC	chr15	75093885	-	93	78	74	0.618625	11	73	22	51	FALSE	FALSE	7	4	0.571429	-12.77	0.415119	Prot_kinase_dom::Ser-Thr/Tyr_kinase_cat_dom::Tyr_kinase_cat_dom				Library	-0.91	-0.389492	-0.138052	0.254899	-0.19	0.394492
ENSG00000103653	ENST00000439220	ENSP00000414764	CSK	CSK-002	PRINCIPAL:1	280	S	TCT	TGTGGACTACCTGCGGTCTA	chr15	75093887	+	95	27	64	0.620843	11	73	24	49	FALSE	FALSE	7	4	0.571429	-11.322	0.434102	Prot_kinase_dom::Ser-Thr/Tyr_kinase_cat_dom::Tyr_kinase_cat_dom				Library		-0.394517		0.252989		0.393924
ENSG00000103653	ENST00000439220	ENSP00000414764	CSK	CSK-002	PRINCIPAL:1	280	S	TCT	GTGGACTACCTGCGGTCTAG	chr15	75093888	+	89	81	68	0.620843	11	73	25	48	FALSE	FALSE	7	4	0.571429	-11.322	0.434102	Prot_kinase_dom::Ser-Thr/Tyr_kinase_cat_dom::Tyr_kinase_cat_dom				Library	-0.55	-0.394517	0.212988	0.252989	0.25	0.393924
ENSG00000103653	ENST00000439220	ENSP00000414764	CSK	CSK-002	PRINCIPAL:1	280	S	TCT	ACTACCTGCGGTCTAGGGGT	chr15	75093892	+	87	86	64	0.620843	11	73	29	44	FALSE	FALSE	7	4	0.571429	-11.322	0.434102	Prot_kinase_dom::Ser-Thr/Tyr_kinase_cat_dom::Tyr_kinase_cat_dom				Library	-0.76	-0.394517	0.339929	0.252989	-0.14	0.393924
ENSG00000103653	ENST00000439220	ENSP00000414764	CSK	CSK-002	PRINCIPAL:1	281	R	AGG	ACTACCTGCGGTCTAGGGGT	chr15	75093892	+	87	86	64	0.62306	11	73	29	44	FALSE	FALSE	7	4	0.571429	-12.877	0.44395	Prot_kinase_dom::Ser-Thr/Tyr_kinase_cat_dom::Tyr_kinase_cat_dom				Library	-0.76	-0.399894	0.339929	0.246418	-0.14	0.390617
ENSG00000103653	ENST00000439220	ENSP00000414764	CSK	CSK-002	PRINCIPAL:1	282	G	GGT								0.625277	11	73			FALSE		7			-13.421	0.433074	Prot_kinase_dom::Ser-Thr/Tyr_kinase_cat_dom::Tyr_kinase_cat_dom				Library		-0.40582		0.239598		0.386592
ENSG00000103653	ENST00000439220	ENSP00000414764	CSK	CSK-002	PRINCIPAL:1	283	R	CGG								0.627494	11	73			FALSE		7			-11.927	0.402026	Prot_kinase_dom::Ser-Thr/Tyr_kinase_cat_dom::Tyr_kinase_cat_dom				Library		-0.411818		0.233174		0.382308
ENSG00000103653	ENST00000439220	ENSP00000414764	CSK	CSK-002	PRINCIPAL:1	284	S	TCA	GTCTAGGGGTCGGTCAGTGC	chr15	75093902	+	84	7	72	0.629712	11	73	39	34	FALSE	FALSE	7	4	0.571429	-9.448	0.395255	Prot_kinase_dom::Ser-Thr/Tyr_kinase_cat_dom::Tyr_kinase_cat_dom				Library	-0.72	-0.417636	-0.12413	0.229769	0.38	0.379978
ENSG00000103653	ENST00000439220	ENSP00000414764	CSK	CSK-002	PRINCIPAL:1	284	S	TCA	TCTAGGGGTCGGTCAGTGCT	chr15	75093903	+	82	40	74	0.629712	11	73	40	33	FALSE	FALSE	7	4	0.571429	-9.448	0.395255	Prot_kinase_dom::Ser-Thr/Tyr_kinase_cat_dom::Tyr_kinase_cat_dom				Library	-0.41	-0.417636	0.0883245	0.229769	0.33	0.379978
ENSG00000103653	ENST00000439220	ENSP00000414764	CSK	CSK-002	PRINCIPAL:1	285	V	GTG	GTCTAGGGGTCGGTCAGTGC	chr15	75093902	+	84	7	72	0.631929	11	73	39	34	FALSE	FALSE	7	4	0.571429	-10.227	0.346396	Prot_kinase_dom::Ser-Thr/Tyr_kinase_cat_dom::Tyr_kinase_cat_dom				Library	-0.72	-0.423418	-0.12413	0.226078	0.38	0.377394
ENSG00000103653	ENST00000439220	ENSP00000414764	CSK	CSK-002	PRINCIPAL:1	285	V	GTG	TCTAGGGGTCGGTCAGTGCT	chr15	75093903	+	82	40	74	0.631929	11	73	40	33	FALSE	FALSE	7	4	0.571429	-10.227	0.346396	Prot_kinase_dom::Ser-Thr/Tyr_kinase_cat_dom::Tyr_kinase_cat_dom				Library	-0.41	-0.423418	0.0883245	0.226078	0.33	0.377394
ENSG00000103653	ENST00000439220	ENSP00000414764	CSK	CSK-002	PRINCIPAL:1	285	V	GTG	AGGGGTCGGTCAGTGCTGGG	chr15	75093906	+	52	92	67	0.631929	11	73	43	30	FALSE	FALSE	7	4	0.571429	-10.227	0.346396	Prot_kinase_dom::Ser-Thr/Tyr_kinase_cat_dom::Tyr_kinase_cat_dom				Library	-0.38	-0.423418	0.330104	0.226078	0.34	0.377394
ENSG00000103653	ENST00000439220	ENSP00000414764	CSK	CSK-002	PRINCIPAL:1	286	L	CTG	AGGGGTCGGTCAGTGCTGGG	chr15	75093906	+	52	92	67	0.634146	11	73	43	30	FALSE	FALSE	7	4	0.571429	-9.121	0.302014	Prot_kinase_dom::Ser-Thr/Tyr_kinase_cat_dom::Tyr_kinase_cat_dom				Library	-0.38	-0.429126	0.330104	0.222066	0.34	0.374566
ENSG00000103653	ENST00000439220	ENSP00000414764	CSK	CSK-002	PRINCIPAL:1	287	G	GGC								0.636364	11	73			FALSE		7			-7.4	0.270696	Prot_kinase_dom::Ser-Thr/Tyr_kinase_cat_dom::Tyr_kinase_cat_dom				Library		-0.434705		0.217683		0.371486
ENSG00000103653	ENST00000439220	ENSP00000414764	CSK	CSK-002	PRINCIPAL:1	288	G	GGA								0.638581	11	73			FALSE		7			-7.4	0.238467	Prot_kinase_dom::Ser-Thr/Tyr_kinase_cat_dom::Tyr_kinase_cat_dom				Library		-0.44104		0.212532		0.368643
ENSG00000103653	ENST00000439220	ENSP00000414764	CSK	CSK-002	PRINCIPAL:1	289	D	GAC								0.640798	11	73			FALSE		7			-8.073	0.193218	Prot_kinase_dom::Ser-Thr/Tyr_kinase_cat_dom::Tyr_kinase_cat_dom				Library		-0.445182		0.207722		0.364523
ENSG00000103653	ENST00000439220	ENSP00000414764	CSK	CSK-002	PRINCIPAL:1	290	C	TGT								0.643016	11	73			FALSE		7			-5.613	0.157468	Prot_kinase_dom::Ser-Thr/Tyr_kinase_cat_dom::Tyr_kinase_cat_dom				Library		-0.449931		0.202237		0.360694
ENSG00000103653	ENST00000439220	ENSP00000414764	CSK	CSK-002	PRINCIPAL:1	291	L	CTC								0.645233	11	73			FALSE		7			-6.31	0.130286	Prot_kinase_dom::Ser-Thr/Tyr_kinase_cat_dom::Tyr_kinase_cat_dom				Library		-0.45427		0.196533		0.356719
ENSG00000103653	ENST00000439220	ENSP00000414764	CSK	CSK-002	PRINCIPAL:1	292	L	CTC	TCACTCACAGCGAGAACTTG	chr15	75093927	-	81	72	66	0.64745	11	73	64	9	FALSE	FALSE	7	4	0.571429	-6.31	0.113451	Prot_kinase_dom::Ser-Thr/Tyr_kinase_cat_dom::Tyr_kinase_cat_dom				Library	-0.55	-0.458085	-0.111276	0.190732	0.19	0.352691
ENSG00000103653	ENST00000439220	ENSP00000414764	CSK	CSK-002	PRINCIPAL:1	293	K	AAG	TCACTCACAGCGAGAACTTG	chr15	75093927	-	81	72	66	0.649667	11	73	64	9	FALSE	FALSE	7	4	0.571429	-6.884	0.10272	Prot_kinase_dom::Ser-Thr/Tyr_kinase_cat_dom::Tyr_kinase_cat_dom				Library	-0.55	-0.463421	-0.111276	0.18123	0.19	0.347519
ENSG00000103653	ENST00000439220	ENSP00000414764	CSK	CSK-002	PRINCIPAL:1	294	F	TTC								0.651885	11	73			FALSE		7			-11.458	0.102617	Prot_kinase_dom::Ser-Thr/Tyr_kinase_cat_dom::Tyr_kinase_cat_dom				Library		-0.468486		0.170212		0.34201
ENSG00000103653	ENST00000439220	ENSP00000414764	CSK	CSK-002	PRINCIPAL:1	295	S	TCG	ATGGCCTCGCAGACATCTCT	chr15	75094036	-	69	21	71	0.654102	11	73	0	195	FALSE	FALSE	7	4	0.571429	-9.196	0.111818	Prot_kinase_dom::Ser-Thr/Tyr_kinase_cat_dom::Tyr_kinase_cat_dom				Library	-0.23	-0.470629	0.348867	0.163738	0.49	0.337958
ENSG00000103653	ENST00000439220	ENSP00000414764	CSK	CSK-002	PRINCIPAL:1	296	L	CTA	ATGGCCTCGCAGACATCTCT	chr15	75094036	-	69	21	71	0.656319	12	73	0	195	FALSE	FALSE	7	4	0.571429	-8.927	0.111686	Prot_kinase_dom::Ser-Thr/Tyr_kinase_cat_dom::Tyr_kinase_cat_dom				Library	-0.23	-0.474476	0.348867	0.152099	0.49	0.332223
ENSG00000103653	ENST00000439220	ENSP00000414764	CSK	CSK-002	PRINCIPAL:1	296	L	CTA	CATGGCCTCGCAGACATCTC	chr15	75094037	-	70	7	70	0.656319	12	73	1	194	FALSE	FALSE	7	4	0.571429	-8.927	0.111686	Prot_kinase_dom::Ser-Thr/Tyr_kinase_cat_dom::Tyr_kinase_cat_dom				Library	-0.54	-0.474476	0.399231	0.152099	0.55	0.332223
ENSG00000103653	ENST00000439220	ENSP00000414764	CSK	CSK-002	PRINCIPAL:1	297	D	GAT	CATGGCCTCGCAGACATCTC	chr15	75094037	-	70	7	70	0.658537	12	195	1	194	TRUE	FALSE	7	4	0.571429	-11.761	0.116639	Prot_kinase_dom::Ser-Thr/Tyr_kinase_cat_dom::Tyr_kinase_cat_dom				Library	-0.54	-0.477735	0.399231	0.14074	0.55	0.326044
ENSG00000103653	ENST00000439220	ENSP00000414764	CSK	CSK-002	PRINCIPAL:1	298	V	GTC	TACCCCCAGAGATGTCTGCG	chr15	75094043	+	80	99	77	0.660754	12	195	7	188	TRUE	FALSE	7	4	0.571429	-10.761	0.126769	Prot_kinase_dom::Ser-Thr/Tyr_kinase_cat_dom::Tyr_kinase_cat_dom				Library	-0.36	-0.474299	0.108596	0.143506	0.64	0.324909
ENSG00000103653	ENST00000439220	ENSP00000414764	CSK	CSK-002	PRINCIPAL:1	299	C	TGC	TACCCCCAGAGATGTCTGCG	chr15	75094043	+	80	99	77	0.662971	12	195	7	188	TRUE	FALSE	7	4	0.571429	-14.557	0.141313	Prot_kinase_dom::Ser-Thr/Tyr_kinase_cat_dom::Tyr_kinase_cat_dom				Library	-0.36	-0.470468	0.108596	0.147325	0.64	0.323602
ENSG00000103653	ENST00000439220	ENSP00000414764	CSK	CSK-002	PRINCIPAL:1	300	E	GAG	CAGAGATGTCTGCGAGGCCA	chr15	75094049	+	66	50	55	0.665188	12	195	13	182	TRUE	FALSE	7	4	0.571429	-10.075	0.166373	Prot_kinase_dom::Ser-Thr/Tyr_kinase_cat_dom::Tyr_kinase_cat_dom				Library		-0.469109		0.145749		0.320568
ENSG00000103653	ENST00000439220	ENSP00000414764	CSK	CSK-002	PRINCIPAL:1	301	A	GCC	CAGAGATGTCTGCGAGGCCA	chr15	75094049	+	66	50	55	0.667406	12	195	13	182	TRUE	FALSE	7	4	0.571429	-9.988	0.182395	Prot_kinase_dom::Ser-Thr/Tyr_kinase_cat_dom::Tyr_kinase_cat_dom				Library		-0.467486		0.145042		0.317949
ENSG00000103653	ENST00000439220	ENSP00000414764	CSK	CSK-002	PRINCIPAL:1	302	M	ATG	GTTGCCCTCCAGGTATTCCA	chr15	75094055	-	75	59	55	0.669623	12	195	19	176	TRUE	FALSE	7	4	0.571429	-12.972	0.191004	Prot_kinase_dom::Ser-Thr/Tyr_kinase_cat_dom::Tyr_kinase_cat_dom				Library	-0.55	-0.466783	0.214677	0.141247	0.36	0.314931
ENSG00000103653	ENST00000439220	ENSP00000414764	CSK	CSK-002	PRINCIPAL:1	303	E	GAA	CTGCGAGGCCATGGAATACC	chr15	75094058	+	76	43	43	0.67184	12	195	22	173	TRUE	FALSE	7	4	0.571429	-10.335	0.200932	Prot_kinase_dom::Ser-Thr/Tyr_kinase_cat_dom::Tyr_kinase_cat_dom				Library	-0.55	-0.463459	-0.0421872	0.146345	0.11	0.314271
ENSG00000103653	ENST00000439220	ENSP00000414764	CSK	CSK-002	PRINCIPAL:1	303	E	GAA	GTTGCCCTCCAGGTATTCCA	chr15	75094055	-	75	59	55	0.67184	12	195	19	176	TRUE	FALSE	7	4	0.571429	-10.335	0.200932	Prot_kinase_dom::Ser-Thr/Tyr_kinase_cat_dom::Tyr_kinase_cat_dom				Library	-0.55	-0.463459	0.214677	0.146345	0.36	0.314271
ENSG00000103653	ENST00000439220	ENSP00000414764	CSK	CSK-002	PRINCIPAL:1	304	Y	TAC	CTGCGAGGCCATGGAATACC	chr15	75094058	+	76	43	43	0.674058	12	195	22	173	TRUE	FALSE	7	4	0.571429	-15.026	0.228659	Prot_kinase_dom::Ser-Thr/Tyr_kinase_cat_dom::Tyr_kinase_cat_dom				Library	-0.55	-0.460795	-0.0421872	0.150665	0.11	0.313537
ENSG00000103653	ENST00000439220	ENSP00000414764	CSK	CSK-002	PRINCIPAL:1	304	Y	TAC	CGAGGCCATGGAATACCTGG	chr15	75094061	+	74	92	45	0.674058	12	195	25	170	TRUE	FALSE	7	4	0.571429	-15.026	0.228659	Prot_kinase_dom::Ser-Thr/Tyr_kinase_cat_dom::Tyr_kinase_cat_dom				Library	-0.38	-0.460795	-0.0755235	0.150665	0.43	0.313537
ENSG00000103653	ENST00000439220	ENSP00000414764	CSK	CSK-002	PRINCIPAL:1	304	Y	TAC	GAGGCCATGGAATACCTGGA	chr15	75094062	+	67	96	45	0.674058	12	195	26	169	TRUE	FALSE	7	4	0.571429	-15.026	0.228659	Prot_kinase_dom::Ser-Thr/Tyr_kinase_cat_dom::Tyr_kinase_cat_dom				Library	-0.49	-0.460795	0.181334	0.150665	0.26	0.313537
ENSG00000103653	ENST00000439220	ENSP00000414764	CSK	CSK-002	PRINCIPAL:1	305	L	CTG	CGAGGCCATGGAATACCTGG	chr15	75094061	+	74	92	45	0.676275	12	195	25	170	TRUE	FALSE	7	4	0.571429	-12.362	0.258302	Prot_kinase_dom::Ser-Thr/Tyr_kinase_cat_dom::Tyr_kinase_cat_dom				Library	-0.38	-0.458457	-0.0755235	0.152559	0.43	0.31274
ENSG00000103653	ENST00000439220	ENSP00000414764	CSK	CSK-002	PRINCIPAL:1	305	L	CTG	GAGGCCATGGAATACCTGGA	chr15	75094062	+	67	96	45	0.676275	12	195	26	169	TRUE	FALSE	7	4	0.571429	-12.362	0.258302	Prot_kinase_dom::Ser-Thr/Tyr_kinase_cat_dom::Tyr_kinase_cat_dom				Library	-0.49	-0.458457	0.181334	0.152559	0.26	0.31274
ENSG00000103653	ENST00000439220	ENSP00000414764	CSK	CSK-002	PRINCIPAL:1	305	L	CTG	GCACGAAATTGTTGCCCTCC	chr15	75094065	-	83	32	41	0.676275	12	195	29	166	TRUE	FALSE	7	4	0.571429	-12.362	0.258302	Prot_kinase_dom::Ser-Thr/Tyr_kinase_cat_dom::Tyr_kinase_cat_dom				Library	-0.26	-0.458457	0.0785519	0.152559	0.09	0.31274
ENSG00000103653	ENST00000439220	ENSP00000414764	CSK	CSK-002	PRINCIPAL:1	306	E	GAG	GCACGAAATTGTTGCCCTCC	chr15	75094065	-	83	32	41	0.678492	12	195	29	166	TRUE	FALSE	7	4	0.571429	-13.318	0.276383	Prot_kinase_dom::Ser-Thr/Tyr_kinase_cat_dom::Tyr_kinase_cat_dom				Library	-0.26	-0.455801	0.0785519	0.15519	0.09	0.31249
ENSG00000103653	ENST00000439220	ENSP00000414764	CSK	CSK-002	PRINCIPAL:1	307	G	GGC								0.68071	12	195			TRUE		7			-8.415	0.289707	Prot_kinase_dom::Ser-Thr/Tyr_kinase_cat_dom::Tyr_kinase_cat_dom				Library		-0.452839		0.158466		0.312708
ENSG00000103653	ENST00000439220	ENSP00000414764	CSK	CSK-002	PRINCIPAL:1	308	N	AAC								0.682927	12	195			TRUE		7			-10.597	0.278296	Prot_kinase_dom::Ser-Thr/Tyr_kinase_cat_dom::Tyr_kinase_cat_dom				Library		-0.449582		0.162258		0.313311
ENSG00000103653	ENST00000439220	ENSP00000414764	CSK	CSK-002	PRINCIPAL:1	309	N	AAT								0.685144	12	195			TRUE		7			-10.597	0.257532	Prot_kinase_dom::Ser-Thr/Tyr_kinase_cat_dom::Tyr_kinase_cat_dom				Library		-0.447109		0.165692		0.313321
ENSG00000103653	ENST00000439220	ENSP00000414764	CSK	CSK-002	PRINCIPAL:1	310	F	TTC								0.687361	12	195			TRUE		7			-11.409	0.234374	Prot_kinase_dom::Ser-Thr/Tyr_kinase_cat_dom::Tyr_kinase_cat_dom				Library		-0.443288		0.169975		0.314537
ENSG00000103653	ENST00000439220	ENSP00000414764	CSK	CSK-002	PRINCIPAL:1	311	V	GTG								0.689579	12	195			TRUE		7			-12.174	0.234215	Prot_kinase_dom::Ser-Thr/Tyr_kinase_cat_dom::Tyr_kinase_cat_dom				Library		-0.438076		0.175826		0.316846
ENSG00000103653	ENST00000439220	ENSP00000414764	CSK	CSK-002	PRINCIPAL:1	312	H	CAT								0.691796	12	195			TRUE		7			-15.81	0.231737	Prot_kinase_dom::Ser-Thr/Tyr_kinase_cat_dom::Tyr_kinase_cat_dom				Library		-0.432325		0.182815		0.319448
ENSG00000103653	ENST00000439220	ENSP00000414764	CSK	CSK-002	PRINCIPAL:1	313	R	CGA	CAATTTCGTGCATCGAGACC	chr15	75094088	+	96	53	52	0.694013	12	195	52	143	TRUE	FALSE	7	4	0.571429	-13.027	0.229584	Prot_kinase_dom::Ser-Thr/Tyr_kinase_cat_dom::Tyr_kinase_cat_dom				Library	-0.58	-0.426239	0.117274	0.19092	0.07	0.322172
ENSG00000103653	ENST00000439220	ENSP00000414764	CSK	CSK-002	PRINCIPAL:1	314	D	GAC	CAATTTCGTGCATCGAGACC	chr15	75094088	+	96	53	52	0.696231	12	195	52	143	TRUE	FALSE	7	4	0.571429	-13.809	0.237778	Prot_kinase_dom::Ser-Thr/Tyr_kinase_cat_dom::Tyr_kinase_cat_dom				Library	-0.58	-0.420272	0.117274	0.19978	0.07	0.3246
ENSG00000103653	ENST00000439220	ENSP00000414764	CSK	CSK-002	PRINCIPAL:1	315	L	CTG	CCAGCACATTGCGGGCAGCC	chr15	75094095	-		46	56	0.698448	12	195	59	136	TRUE	FALSE	7	4	0.571429	-12.29	0.233731	Prot_kinase_dom::Ser-Thr/Tyr_kinase_cat_dom::Tyr_kinase_cat_dom				Library		-0.416183		0.204152		0.326179
ENSG00000103653	ENST00000439220	ENSP00000414764	CSK	CSK-002	PRINCIPAL:1	316	A	GCT	CCAGCACATTGCGGGCAGCC	chr15	75094095	-		46	56	0.700665	12	195	59	136	TRUE	FALSE	7	4	0.571429	-12.302	0.2404	Prot_kinase_dom::Ser-Thr/Tyr_kinase_cat_dom::Tyr_kinase_cat_dom				Library		-0.4103		0.209337		0.329186
ENSG00000103653	ENST00000439220	ENSP00000414764	CSK	CSK-002	PRINCIPAL:1	317	A	GCC								0.702882	12	195			TRUE		7			-12.302	0.258983	Prot_kinase_dom::Ser-Thr/Tyr_kinase_cat_dom::Tyr_kinase_cat_dom				Library		-0.403892		0.216611		0.332312
ENSG00000103653	ENST00000439220	ENSP00000414764	CSK	CSK-002	PRINCIPAL:1	318	R	CGC	CTCAGACACCAGCACATTGC	chr15	75094103	-	40	32	55	0.7051	12	195	67	128	TRUE	FALSE	7	4	0.571429	-13.345	0.268263	Prot_kinase_dom::Ser-Thr/Tyr_kinase_cat_dom::Tyr_kinase_cat_dom				Library	-1.1	-0.397287	0.0727283	0.223876	0.17	0.335649
ENSG00000103653	ENST00000439220	ENSP00000414764	CSK	CSK-002	PRINCIPAL:1	318	R	CGC	CCTCAGACACCAGCACATTG	chr15	75094104	-	25	92	48	0.7051	12	195	68	127	TRUE	FALSE	7	4	0.571429	-13.345	0.268263	Prot_kinase_dom::Ser-Thr/Tyr_kinase_cat_dom::Tyr_kinase_cat_dom				Library	-0.38	-0.397287	0.471018	0.223876	0.46	0.335649
ENSG00000103653	ENST00000439220	ENSP00000414764	CSK	CSK-002	PRINCIPAL:1	319	N	AAT	CCTGGCTGCCCGCAATGTGC	chr15	75094106	+		32	46	0.707317	12	195	70	125	TRUE	FALSE	7	4	0.571429	-14.131	0.273535	Prot_kinase_dom::Ser-Thr/Tyr_kinase_cat_dom::Tyr_kinase_cat_dom				Library		-0.390529		0.231052		0.339246
ENSG00000103653	ENST00000439220	ENSP00000414764	CSK	CSK-002	PRINCIPAL:1	319	N	AAT	CTCAGACACCAGCACATTGC	chr15	75094103	-	40	32	55	0.707317	12	195	67	128	TRUE	FALSE	7	4	0.571429	-14.131	0.273535	Prot_kinase_dom::Ser-Thr/Tyr_kinase_cat_dom::Tyr_kinase_cat_dom				Library	-1.1	-0.390529	0.0727283	0.231052	0.17	0.339246
ENSG00000103653	ENST00000439220	ENSP00000414764	CSK	CSK-002	PRINCIPAL:1	319	N	AAT	CCTCAGACACCAGCACATTG	chr15	75094104	-	25	92	48	0.707317	12	195	68	127	TRUE	FALSE	7	4	0.571429	-14.131	0.273535	Prot_kinase_dom::Ser-Thr/Tyr_kinase_cat_dom::Tyr_kinase_cat_dom				Library	-0.38	-0.390529	0.471018	0.231052	0.46	0.339246
ENSG00000103653	ENST00000439220	ENSP00000414764	CSK	CSK-002	PRINCIPAL:1	320	V	GTG	CCTGGCTGCCCGCAATGTGC	chr15	75094106	+		32	46	0.709534	12	195	70	125	TRUE	FALSE	7	4	0.571429	-12.201	0.28649	Prot_kinase_dom::Ser-Thr/Tyr_kinase_cat_dom::Tyr_kinase_cat_dom				Library		-0.381945		0.237235		0.346097
ENSG00000103653	ENST00000439220	ENSP00000414764	CSK	CSK-002	PRINCIPAL:1	321	L	CTG								0.711752	12	195			TRUE		7			-12.43	0.300236	Prot_kinase_dom::Ser-Thr/Tyr_kinase_cat_dom::Tyr_kinase_cat_dom				Library		-0.374747		0.244377		0.351142
ENSG00000103653	ENST00000439220	ENSP00000414764	CSK	CSK-002	PRINCIPAL:1	322	V	GTG	CCGCAATGTGCTGGTGTCTG	chr15	75094115	+	45	66	44	0.713969	12	195	79	116	TRUE	FALSE	7	4	0.571429	-11.845	0.326227	Prot_kinase_dom::Ser-Thr/Tyr_kinase_cat_dom::Tyr_kinase_cat_dom				Library	0.5	-0.365962	0.728227	0.250619	0.7	0.360251
ENSG00000103653	ENST00000439220	ENSP00000414764	CSK	CSK-002	PRINCIPAL:1	323	S	TCT	CCGCAATGTGCTGGTGTCTG	chr15	75094115	+	45	66	44	0.716186	12	195	79	116	TRUE	FALSE	7	4	0.571429	-11.356	0.376177	Prot_kinase_dom::Ser-Thr/Tyr_kinase_cat_dom::Tyr_kinase_cat_dom				Library	0.5	-0.357463	0.728227	0.256663	0.7	0.370115
ENSG00000103653	ENST00000439220	ENSP00000414764	CSK	CSK-002	PRINCIPAL:1	324	E	GAG								0.718404	12	195			TRUE		7			-11.426	0.409925	Prot_kinase_dom::Ser-Thr/Tyr_kinase_cat_dom::Tyr_kinase_cat_dom				Library		-0.350351		0.263302		0.377176
ENSG00000103653	ENST00000439220	ENSP00000414764	CSK	CSK-002	PRINCIPAL:1	325	D	GAC	GCTGGTGTCTGAGGACAACG	chr15	75094124	+	70	100	38	0.720621	12	195	88	107	TRUE	FALSE	7	4	0.571429	-11.958	0.418894	Prot_kinase_dom::Ser-Thr/Tyr_kinase_cat_dom::Tyr_kinase_cat_dom				Library	-0.36	-0.343381	0.161601	0.269667	0.31	0.384745
ENSG00000103653	ENST00000439220	ENSP00000414764	CSK	CSK-002	PRINCIPAL:1	326	N	AAC	GCTGGTGTCTGAGGACAACG	chr15	75094124	+	70	100	38	0.722838	12	195	88	107	TRUE	FALSE	7	4	0.571429	-10.952	0.423861	Prot_kinase_dom::Ser-Thr/Tyr_kinase_cat_dom::Tyr_kinase_cat_dom				Library	-0.36	-0.335886	0.161601	0.274983	0.31	0.396546
ENSG00000103653	ENST00000439220	ENSP00000414764	CSK	CSK-002	PRINCIPAL:1	327	V	GTG	GTCTGAGGACAACGTGGCCA	chr15	75094130	+	67	63	36	0.725055	12	195	94	101	TRUE	FALSE	7	4	0.571429	-11.14	0.415887	Prot_kinase_dom::Ser-Thr/Tyr_kinase_cat_dom::Tyr_kinase_cat_dom				Library	-0.31	-0.329564	0.432835	0.280867	0.61	0.405277
ENSG00000103653	ENST00000439220	ENSP00000414764	CSK	CSK-002	PRINCIPAL:1	328	A	GCC	GTCTGAGGACAACGTGGCCA	chr15	75094130	+	67	63	36	0.727273	12	195	94	101	TRUE	FALSE	7	4	0.571429	-12.331	0.405925	Prot_kinase_dom::Ser-Thr/Tyr_kinase_cat_dom::Tyr_kinase_cat_dom				Library	-0.31	-0.324363	0.432835	0.287063	0.61	0.410979
ENSG00000103653	ENST00000439220	ENSP00000414764	CSK	CSK-002	PRINCIPAL:1	329	K	AAG	GAGACCAAAGTCGCTGACCT	chr15	75094136	-	72	63	36	0.72949	12	195	100	95	TRUE	FALSE	7	4	0.571429	-13.1	0.40401	Prot_kinase_dom::Ser-Thr/Tyr_kinase_cat_dom::Tyr_kinase_cat_dom				Library	-0.41	-0.319018	0.0538702	0.292022	0.18	0.420534
ENSG00000103653	ENST00000439220	ENSP00000414764	CSK	CSK-002	PRINCIPAL:1	330	V	GTC	GAGACCAAAGTCGCTGACCT	chr15	75094136	-	72	63	36	0.731707	12	195	100	95	TRUE	FALSE	7	4	0.571429	-12.399	0.406738	Prot_kinase_dom::Ser-Thr/Tyr_kinase_cat_dom::Tyr_kinase_cat_dom				Library	-0.41	-0.31428	0.0538702	0.296422	0.18	0.430191
ENSG00000103653	ENST00000439220	ENSP00000414764	CSK	CSK-002	PRINCIPAL:1	331	S	AGC	GTGGCCAAGGTCAGCGACTT	chr15	75094143	+		27	52	0.733925	12	195	107	88	TRUE	FALSE	7	4	0.571429	-12.072	0.414967	Prot_kinase_dom::Ser-Thr/Tyr_kinase_cat_dom::Tyr_kinase_cat_dom				Library		-0.310205		0.30022		0.43974
ENSG00000103653	ENST00000439220	ENSP00000414764	CSK	CSK-002	PRINCIPAL:1	332	D	GAC	GTGGCCAAGGTCAGCGACTT	chr15	75094143	+		27	52	0.736142	12	195	107	88	TRUE	FALSE	7	4	0.571429	-14.092	0.434968	Prot_kinase_dom::Ser-Thr/Tyr_kinase_cat_dom::Tyr_kinase_cat_dom				Library		-0.307201		0.302758		0.450521
ENSG00000103653	ENST00000439220	ENSP00000414764	CSK	CSK-002	PRINCIPAL:1	333	F	TTT								0.738359	12	195			TRUE		7			-14.168	0.458807	Prot_kinase_dom::Ser-Thr/Tyr_kinase_cat_dom::Tyr_kinase_cat_dom				Library		-0.305562		0.304392		0.459707
ENSG00000103653	ENST00000439220	ENSP00000414764	CSK	CSK-002	PRINCIPAL:1	334	G	GGT								0.740576	12	195			TRUE		7			-14.219	0.497048	Prot_kinase_dom::Ser-Thr/Tyr_kinase_cat_dom::Tyr_kinase_cat_dom				Library		-0.305074		0.305265		0.467257
ENSG00000103653	ENST00000439220	ENSP00000414764	CSK	CSK-002	PRINCIPAL:1	335	L	CTC	CAGCGACTTTGGTCTCACCA	chr15	75094154	+	71	98	47	0.742794	12	195	118	77	TRUE	FALSE	7	4	0.571429	-11.765	0.539871	Prot_kinase_dom::Ser-Thr/Tyr_kinase_cat_dom::Tyr_kinase_cat_dom				Library	-0.41	-0.305626	0.355551	0.305471	0.24	0.473314
ENSG00000103653	ENST00000439220	ENSP00000414764	CSK	CSK-002	PRINCIPAL:1	336	T	ACC	CAGCGACTTTGGTCTCACCA	chr15	75094154	+	71	98	47	0.745011	12	195	118	77	TRUE	FALSE	7	4	0.571429	-9.791	0.577639	Prot_kinase_dom::Ser-Thr/Tyr_kinase_cat_dom::Tyr_kinase_cat_dom				Library	-0.41	-0.305796	0.355551	0.306215	0.24	0.478698
ENSG00000103653	ENST00000439220	ENSP00000414764	CSK	CSK-002	PRINCIPAL:1	336	T	ACC	CGACTTTGGTCTCACCAAGG	chr15	75094157	+	85	98	43	0.745011	12	195	121	74	TRUE	FALSE	7	4	0.571429	-9.791	0.577639	Prot_kinase_dom::Ser-Thr/Tyr_kinase_cat_dom::Tyr_kinase_cat_dom				Library	-0.35	-0.305796	0.210751	0.306215	0.45	0.478698
ENSG00000103653	ENST00000439220	ENSP00000414764	CSK	CSK-002	PRINCIPAL:1	337	K	AAG	CGACTTTGGTCTCACCAAGG	chr15	75094157	+	85	98	43	0.747228	12	195	121	74	TRUE	FALSE	7	4	0.571429	-10.019	0.602564	Prot_kinase_dom::Ser-Thr/Tyr_kinase_cat_dom::Tyr_kinase_cat_dom				Library	-0.35	-0.305083	0.210751	0.307643	0.45	0.48439
ENSG00000103653	ENST00000439220	ENSP00000414764	CSK	CSK-002	PRINCIPAL:1	337	K	AAG	CTGGGTGCTGGACGCCTCCT	chr15	75094160	-	75	25	47	0.747228	12	195	124	71	TRUE	FALSE	7	4	0.571429	-10.019	0.602564	Prot_kinase_dom::Ser-Thr/Tyr_kinase_cat_dom::Tyr_kinase_cat_dom				Library	-0.18	-0.305083	0.494924	0.307643	0.41	0.48439
ENSG00000103653	ENST00000439220	ENSP00000414764	CSK	CSK-002	PRINCIPAL:1	338	E	GAG	CTGGGTGCTGGACGCCTCCT	chr15	75094160	-	75	25	47	0.749446	12	195	124	71	TRUE	FALSE	7	4	0.571429	-8.827	0.615646	Prot_kinase_dom::Ser-Thr/Tyr_kinase_cat_dom::Tyr_kinase_cat_dom				Library	-0.18	-0.304842	0.494924	0.308564	0.41	0.489949
ENSG00000103653	ENST00000439220	ENSP00000414764	CSK	CSK-002	PRINCIPAL:1	339	A	GCG								0.751663	12	195			TRUE		7			-7.383	0.640855	Prot_kinase_dom::Ser-Thr/Tyr_kinase_cat_dom::Tyr_kinase_cat_dom				Library		-0.306677		0.307864		0.494273
ENSG00000103653	ENST00000439220	ENSP00000414764	CSK	CSK-002	PRINCIPAL:1	340	S	TCC								0.75388	12	195			TRUE		7			-7.285	0.672975	Prot_kinase_dom::Ser-Thr/Tyr_kinase_cat_dom::Tyr_kinase_cat_dom				Library		-0.311682		0.305037		0.496457
ENSG00000103653	ENST00000439220	ENSP00000414764	CSK	CSK-002	PRINCIPAL:1	341	S	AGC	CAAGGAGGCGTCCAGCACCC	chr15	75094172	+	65	91	50	0.756098	12	195	136	59	TRUE	FALSE	7	4	0.571429	-7.285	0.650162	Prot_kinase_dom::Ser-Thr/Tyr_kinase_cat_dom::Tyr_kinase_cat_dom				Library	-1.42	-0.315586	-0.666743	0.30292	0.15	0.499432
ENSG00000103653	ENST00000439220	ENSP00000414764	CSK	CSK-002	PRINCIPAL:1	341	S	AGC	CTTGCCCGTGTCCTGGGTGC	chr15	75094172	-	51	12	44	0.756098	12	195	136	59	TRUE	FALSE	7	4	0.571429	-7.285	0.650162	Prot_kinase_dom::Ser-Thr/Tyr_kinase_cat_dom::Tyr_kinase_cat_dom				Library	-0.84	-0.315586	0.311977	0.30292	0.46	0.499432
ENSG00000103653	ENST00000439220	ENSP00000414764	CSK	CSK-002	PRINCIPAL:1	342	T	ACC	CAAGGAGGCGTCCAGCACCC	chr15	75094172	+	65	91	50	0.758315	12	195	136	59	TRUE	FALSE	7	4	0.571429	-6.899	0.653408	Prot_kinase_dom::Ser-Thr/Tyr_kinase_cat_dom::Tyr_kinase_cat_dom				Library	-1.42	-0.320308	-0.666743	0.300218	0.15	0.501916
ENSG00000103653	ENST00000439220	ENSP00000414764	CSK	CSK-002	PRINCIPAL:1	342	T	ACC	CTTGCCCGTGTCCTGGGTGC	chr15	75094172	-	51	12	44	0.758315	12	195	136	59	TRUE	FALSE	7	4	0.571429	-6.899	0.653408	Prot_kinase_dom::Ser-Thr/Tyr_kinase_cat_dom::Tyr_kinase_cat_dom				Library	-0.84	-0.320308	0.311977	0.300218	0.46	0.501916
ENSG00000103653	ENST00000439220	ENSP00000414764	CSK	CSK-002	PRINCIPAL:1	343	Q	CAG	GGCGTCCAGCACCCAGGACA	chr15	75094178	+	43	59	57	0.760532	12	195	142	53	TRUE	FALSE	7	4	0.571429	-7.143	0.631084	Prot_kinase_dom::Ser-Thr/Tyr_kinase_cat_dom::Tyr_kinase_cat_dom				Library	-0.45	-0.322205	0.54273	0.298903	0.63	0.506629
ENSG00000103653	ENST00000439220	ENSP00000414764	CSK	CSK-002	PRINCIPAL:1	343	Q	CAG	GCGTCCAGCACCCAGGACAC	chr15	75094179	+	48	75	59	0.760532	12	195	143	52	TRUE	FALSE	7	4	0.571429	-7.143	0.631084	Prot_kinase_dom::Ser-Thr/Tyr_kinase_cat_dom::Tyr_kinase_cat_dom				Library	-0.28	-0.322205	0.122553	0.298903	0.47	0.506629
ENSG00000103653	ENST00000439220	ENSP00000414764	CSK	CSK-002	PRINCIPAL:1	343	Q	CAG	TGGCAGCTTGCCCGTGTCCT	chr15	75094178	-	70	30	50	0.760532	12	195	142	53	TRUE	FALSE	7	4	0.571429	-7.143	0.631084	Prot_kinase_dom::Ser-Thr/Tyr_kinase_cat_dom::Tyr_kinase_cat_dom				Library	0.88	-0.322205	1.01079	0.298903	0.97	0.506629
ENSG00000103653	ENST00000439220	ENSP00000414764	CSK	CSK-002	PRINCIPAL:1	343	Q	CAG	CTGGCAGCTTGCCCGTGTCC	chr15	75094179	-	75	6	53	0.760532	12	195	143	52	TRUE	FALSE	7	4	0.571429	-7.143	0.631084	Prot_kinase_dom::Ser-Thr/Tyr_kinase_cat_dom::Tyr_kinase_cat_dom				Library	0.3	-0.322205	0.224285	0.298903	0.54	0.506629
ENSG00000103653	ENST00000439220	ENSP00000414764	CSK	CSK-002	PRINCIPAL:1	344	D	GAC	GGCGTCCAGCACCCAGGACA	chr15	75094178	+	43	59	57	0.762749	12	195	142	53	TRUE	FALSE	7	4	0.571429	-8.412	0.632875	Prot_kinase_dom::Ser-Thr/Tyr_kinase_cat_dom::Tyr_kinase_cat_dom				Library	-0.45	-0.324491	0.54273	0.296897	0.63	0.511366
ENSG00000103653	ENST00000439220	ENSP00000414764	CSK	CSK-002	PRINCIPAL:1	344	D	GAC	GCGTCCAGCACCCAGGACAC	chr15	75094179	+	48	75	59	0.762749	12	195	143	52	TRUE	FALSE	7	4	0.571429	-8.412	0.632875	Prot_kinase_dom::Ser-Thr/Tyr_kinase_cat_dom::Tyr_kinase_cat_dom				Library	-0.28	-0.324491	0.122553	0.296897	0.47	0.511366
ENSG00000103653	ENST00000439220	ENSP00000414764	CSK	CSK-002	PRINCIPAL:1	344	D	GAC	TGGCAGCTTGCCCGTGTCCT	chr15	75094178	-	70	30	50	0.762749	12	195	142	53	TRUE	FALSE	7	4	0.571429	-8.412	0.632875	Prot_kinase_dom::Ser-Thr/Tyr_kinase_cat_dom::Tyr_kinase_cat_dom				Library	0.88	-0.324491	1.01079	0.296897	0.97	0.511366
ENSG00000103653	ENST00000439220	ENSP00000414764	CSK	CSK-002	PRINCIPAL:1	344	D	GAC	CTGGCAGCTTGCCCGTGTCC	chr15	75094179	-	75	6	53	0.762749	12	195	143	52	TRUE	FALSE	7	4	0.571429	-8.412	0.632875	Prot_kinase_dom::Ser-Thr/Tyr_kinase_cat_dom::Tyr_kinase_cat_dom				Library	0.3	-0.324491	0.224285	0.296897	0.54	0.511366
ENSG00000103653	ENST00000439220	ENSP00000414764	CSK	CSK-002	PRINCIPAL:1	345	T	ACG								0.764967	12	195			TRUE		7			-7.542	0.620999	Prot_kinase_dom::Ser-Thr/Tyr_kinase_cat_dom::Tyr_kinase_cat_dom				Library		-0.327361		0.293932		0.515798
ENSG00000103653	ENST00000439220	ENSP00000414764	CSK	CSK-002	PRINCIPAL:1	346	G	GGC								0.767184	12	195			TRUE		7			-9.028	0.587628	Prot_kinase_dom::Ser-Thr/Tyr_kinase_cat_dom::Tyr_kinase_cat_dom				Library		-0.331026		0.289768		0.519544
ENSG00000103653	ENST00000439220	ENSP00000414764	CSK	CSK-002	PRINCIPAL:1	347	K	AAG								0.769401	12	195			TRUE		7			-11.497	0.540675	Prot_kinase_dom::Ser-Thr/Tyr_kinase_cat_dom::Tyr_kinase_cat_dom				Library		-0.339419		0.28364		0.519352
ENSG00000103653	ENST00000439220	ENSP00000414764	CSK	CSK-002	PRINCIPAL:1	348	L	CTG								0.771619	12	195			TRUE		7			-10.981	0.504484	Prot_kinase_dom::Ser-Thr/Tyr_kinase_cat_dom::Tyr_kinase_cat_dom				Library		-0.3489		0.276956		0.51821
ENSG00000103653	ENST00000439220	ENSP00000414764	CSK	CSK-002	PRINCIPAL:1	349	P	CCA	CGGGCAAGCTGCCAGTCAAG	chr15	75094198	+	72	72	69	0.773836	12	195	162	33	TRUE	FALSE	7	4	0.571429	-15.135	0.451076	Prot_kinase_dom::Ser-Thr/Tyr_kinase_cat_dom::Tyr_kinase_cat_dom				Library	0.11	-0.359372	0.402246	0.269889	0.75	0.516129
ENSG00000103653	ENST00000439220	ENSP00000414764	CSK	CSK-002	PRINCIPAL:1	349	P	CCA	TCAGGGGCTGTCCACTTGAC	chr15	75094198	-	48	25	66	0.773836	12	195	162	33	TRUE	FALSE	7	4	0.571429	-15.135	0.451076	Prot_kinase_dom::Ser-Thr/Tyr_kinase_cat_dom::Tyr_kinase_cat_dom				Library	-0.66	-0.359372	0.245926	0.269889	0.47	0.516129
ENSG00000103653	ENST00000439220	ENSP00000414764	CSK	CSK-002	PRINCIPAL:1	350	V	GTC	CGGGCAAGCTGCCAGTCAAG	chr15	75094198	+	72	72	69	0.776053	12	195	162	33	TRUE	FALSE	7	4	0.571429	-12.218	0.38425	Prot_kinase_dom::Ser-Thr/Tyr_kinase_cat_dom::Tyr_kinase_cat_dom				Library	0.11	-0.367148	0.402246	0.263325	0.75	0.516374
ENSG00000103653	ENST00000439220	ENSP00000414764	CSK	CSK-002	PRINCIPAL:1	350	V	GTC	TCAGGGGCTGTCCACTTGAC	chr15	75094198	-	48	25	66	0.776053	12	195	162	33	TRUE	FALSE	7	4	0.571429	-12.218	0.38425	Prot_kinase_dom::Ser-Thr/Tyr_kinase_cat_dom::Tyr_kinase_cat_dom				Library	-0.66	-0.367148	0.245926	0.263325	0.47	0.516374
ENSG00000103653	ENST00000439220	ENSP00000414764	CSK	CSK-002	PRINCIPAL:1	351	K	AAG								0.778271	12	195			TRUE		7			-13.392	0.367884	Prot_kinase_dom::Ser-Thr/Tyr_kinase_cat_dom::Tyr_kinase_cat_dom				Library		-0.376014		0.257169		0.515488
ENSG00000103653	ENST00000439220	ENSP00000414764	CSK	CSK-002	PRINCIPAL:1	352	W	TGG								0.780488	12	195			TRUE		7			-18.731	0.352197	Prot_kinase_dom::Ser-Thr/Tyr_kinase_cat_dom::Tyr_kinase_cat_dom				Library		-0.392108		0.24923		0.507664
ENSG00000103653	ENST00000439220	ENSP00000414764	CSK	CSK-002	PRINCIPAL:1	353	T	ACA								0.782705	12	195			TRUE		7			-13.417	0.362208	Prot_kinase_dom::Ser-Thr/Tyr_kinase_cat_dom::Tyr_kinase_cat_dom				Library		-0.404831		0.242903		0.502336
ENSG00000103653	ENST00000439220	ENSP00000414764	CSK	CSK-002	PRINCIPAL:1	354	A	GCC	AGTCAAGTGGACAGCCCCTG	chr15	75094211	+	56	89	69	0.784922	12	195	175	20	TRUE	FALSE	7	4	0.571429	-12.173	0.364406	Prot_kinase_dom::Ser-Thr/Tyr_kinase_cat_dom::Tyr_kinase_cat_dom				Library	0.06	-0.418845	0.656801	0.236712	0.97	0.49444
ENSG00000103653	ENST00000439220	ENSP00000414764	CSK	CSK-002	PRINCIPAL:1	355	P	CCT	AGTCAAGTGGACAGCCCCTG	chr15	75094211	+	56	89	69	0.78714	12	195	175	20	TRUE	FALSE	7	4	0.571429	-15.089	0.375413	Prot_kinase_dom::Ser-Thr/Tyr_kinase_cat_dom::Tyr_kinase_cat_dom				Library	0.06	-0.430773	0.656801	0.231613	0.97	0.487083
ENSG00000103653	ENST00000439220	ENSP00000414764	CSK	CSK-002	PRINCIPAL:1	355	P	CCT	CTTCTCTCTCAGGGCCTCAG	chr15	75094214	-	34	66	66	0.78714	12	195	178	17	TRUE	FALSE	7	4	0.571429	-15.089	0.375413	Prot_kinase_dom::Ser-Thr/Tyr_kinase_cat_dom::Tyr_kinase_cat_dom				Library	-0.53	-0.430773	0.229552	0.231613	0.44	0.487083
ENSG00000103653	ENST00000439220	ENSP00000414764	CSK	CSK-002	PRINCIPAL:1	355	P	CCT	CCTTCTCTCTCAGGGCCTCA	chr15	75094215	-	38	21	67	0.78714	12	195	179	16	TRUE	FALSE	7	4	0.571429	-15.089	0.375413	Prot_kinase_dom::Ser-Thr/Tyr_kinase_cat_dom::Tyr_kinase_cat_dom				Library		-0.430773		0.231613		0.487083
ENSG00000103653	ENST00000439220	ENSP00000414764	CSK	CSK-002	PRINCIPAL:1	355	P	CCT	ACCTTCTCTCTCAGGGCCTC	chr15	75094216	-	35	7	69	0.78714	12	195	180	15	TRUE	FALSE	7	4	0.571429	-15.089	0.375413	Prot_kinase_dom::Ser-Thr/Tyr_kinase_cat_dom::Tyr_kinase_cat_dom				Library		-0.430773		0.231613		0.487083
ENSG00000103653	ENST00000439220	ENSP00000414764	CSK	CSK-002	PRINCIPAL:1	356	E	GAG	CTTCTCTCTCAGGGCCTCAG	chr15	75094214	-	34	66	66	0.789357	12	195	178	17	TRUE	FALSE	7	4	0.571429	-13.312	0.409097	Prot_kinase_dom::Ser-Thr/Tyr_kinase_cat_dom::Tyr_kinase_cat_dom				Library	-0.53	-0.441135	0.229552	0.22705	0.44	0.481622
ENSG00000103653	ENST00000439220	ENSP00000414764	CSK	CSK-002	PRINCIPAL:1	356	E	GAG	CCTTCTCTCTCAGGGCCTCA	chr15	75094215	-	38	21	67	0.789357	12	195	179	16	TRUE	FALSE	7	4	0.571429	-13.312	0.409097	Prot_kinase_dom::Ser-Thr/Tyr_kinase_cat_dom::Tyr_kinase_cat_dom				Library		-0.441135		0.22705		0.481622
ENSG00000103653	ENST00000439220	ENSP00000414764	CSK	CSK-002	PRINCIPAL:1	356	E	GAG	ACCTTCTCTCTCAGGGCCTC	chr15	75094216	-	35	7	69	0.789357	12	195	180	15	TRUE	FALSE	7	4	0.571429	-13.312	0.409097	Prot_kinase_dom::Ser-Thr/Tyr_kinase_cat_dom::Tyr_kinase_cat_dom				Library		-0.441135		0.22705		0.481622
ENSG00000103653	ENST00000439220	ENSP00000414764	CSK	CSK-002	PRINCIPAL:1	357	A	GCC								0.791574	12	195			TRUE		7			-12.15	0.440982	Prot_kinase_dom::Ser-Thr/Tyr_kinase_cat_dom::Tyr_kinase_cat_dom				Library		-0.451111		0.222869		0.476
ENSG00000103653	ENST00000439220	ENSP00000414764	CSK	CSK-002	PRINCIPAL:1	358	L	CTG	CAGCCCCACCTTCTCTCTCA	chr15	75094223	-	42	46	64	0.793792	12	195	187	8	TRUE	FALSE	7	4	0.571429	-12.076	0.493619	Prot_kinase_dom::Ser-Thr/Tyr_kinase_cat_dom::Tyr_kinase_cat_dom				Library	-0.75	-0.462093	-0.186416	0.218488	0.22	0.471349
ENSG00000103653	ENST00000439220	ENSP00000414764	CSK	CSK-002	PRINCIPAL:1	358	L	CTG	CCAGCCCCACCTTCTCTCTC	chr15	75094224	-	26	8	64	0.793792	12	195	188	7	TRUE	FALSE	7	4	0.571429	-12.076	0.493619	Prot_kinase_dom::Ser-Thr/Tyr_kinase_cat_dom::Tyr_kinase_cat_dom				Library		-0.462093		0.218488		0.471349
ENSG00000103653	ENST00000439220	ENSP00000414764	CSK	CSK-002	PRINCIPAL:1	359	R	AGA	CCCTGAGGCCCTGAGAGAGA	chr15	75094226	+	29	69	60	0.796009	12	195	190	5	TRUE	FALSE	7	4	0.571429	-10.71	0.540641	Prot_kinase_dom::Ser-Thr/Tyr_kinase_cat_dom::Tyr_kinase_cat_dom				Library	-0.24	-0.47373	0.499075	0.214072	0.81	0.466226
ENSG00000103653	ENST00000439220	ENSP00000414764	CSK	CSK-002	PRINCIPAL:1	359	R	AGA	CAGCCCCACCTTCTCTCTCA	chr15	75094223	-	42	46	64	0.796009	12	195	187	8	TRUE	FALSE	7	4	0.571429	-10.71	0.540641	Prot_kinase_dom::Ser-Thr/Tyr_kinase_cat_dom::Tyr_kinase_cat_dom				Library	-0.75	-0.47373	-0.186416	0.214072	0.22	0.466226
ENSG00000103653	ENST00000439220	ENSP00000414764	CSK	CSK-002	PRINCIPAL:1	359	R	AGA	CCAGCCCCACCTTCTCTCTC	chr15	75094224	-	26	8	64	0.796009	12	195	188	7	TRUE	FALSE	7	4	0.571429	-10.71	0.540641	Prot_kinase_dom::Ser-Thr/Tyr_kinase_cat_dom::Tyr_kinase_cat_dom				Library		-0.47373		0.214072		0.466226
ENSG00000103653	ENST00000439220	ENSP00000414764	CSK	CSK-002	PRINCIPAL:1	360	E	GAG	CCCTGAGGCCCTGAGAGAGA	chr15	75094226	+	29	69	60	0.798226	12	195	190	5	TRUE	FALSE	7	4	0.571429	-9.442	0.611473	Prot_kinase_dom::Ser-Thr/Tyr_kinase_cat_dom::Tyr_kinase_cat_dom				Library	-0.24	-0.485694	0.499075	0.209709	0.81	0.460656
ENSG00000103653	ENST00000439220	ENSP00000414764	CSK	CSK-002	PRINCIPAL:1	360	E	GAG	TGAGGCCCTGAGAGAGAAGG	chr15	75094229	+	22	63	62	0.798226	12	195	193	2	TRUE	FALSE	7	4	0.571429	-9.442	0.611473	Prot_kinase_dom::Ser-Thr/Tyr_kinase_cat_dom::Tyr_kinase_cat_dom				Library		-0.485694		0.209709		0.460656
ENSG00000103653	ENST00000439220	ENSP00000414764	CSK	CSK-002	PRINCIPAL:1	360	E	GAG	GAGGCCCTGAGAGAGAAGGT	chr15	75094230	+	33	78	62	0.798226	12	195	194	1	TRUE	FALSE	7	4	0.571429	-9.442	0.611473	Prot_kinase_dom::Ser-Thr/Tyr_kinase_cat_dom::Tyr_kinase_cat_dom				Library		-0.485694		0.209709		0.460656
ENSG00000103653	ENST00000439220	ENSP00000414764	CSK	CSK-002	PRINCIPAL:1	360	E	GAG	AGGCCCTGAGAGAGAAGGTG	chr15	75094231	+	34	81	67	0.798226	12	195	195	0	TRUE	FALSE	7	4	0.571429	-9.442	0.611473	Prot_kinase_dom::Ser-Thr/Tyr_kinase_cat_dom::Tyr_kinase_cat_dom				Library	-0.97	-0.485694	0.00487838	0.209709	0.33	0.460656
ENSG00000103653	ENST00000439220	ENSP00000414764	CSK	CSK-002	PRINCIPAL:1	361	K	AAG	TGAGGCCCTGAGAGAGAAGG	chr15	75094229	+	22	63	62	0.800443	12	195	193	2	TRUE	FALSE	7	4	0.571429	-9.145	0.578252	Prot_kinase_dom::Ser-Thr/Tyr_kinase_cat_dom::Tyr_kinase_cat_dom				Library		-0.497533		0.205447		0.454604
ENSG00000103653	ENST00000439220	ENSP00000414764	CSK	CSK-002	PRINCIPAL:1	361	K	AAG	GAGGCCCTGAGAGAGAAGGT	chr15	75094230	+	33	78	62	0.800443	12	195	194	1	TRUE	FALSE	7	4	0.571429	-9.145	0.578252	Prot_kinase_dom::Ser-Thr/Tyr_kinase_cat_dom::Tyr_kinase_cat_dom				Library		-0.497533		0.205447		0.454604
ENSG00000103653	ENST00000439220	ENSP00000414764	CSK	CSK-002	PRINCIPAL:1	361	K	AAG	AGGCCCTGAGAGAGAAGGTG	chr15	75094231	+	34	81	67	0.800443	12	195	195	0	TRUE	FALSE	7	4	0.571429	-9.145	0.578252	Prot_kinase_dom::Ser-Thr/Tyr_kinase_cat_dom::Tyr_kinase_cat_dom				Library	-0.97	-0.497533	0.00487838	0.205447	0.33	0.454604
ENSG00000103653	ENST00000439220	ENSP00000414764	CSK	CSK-002	PRINCIPAL:1	362	K	AAA								0.802661	13	86			FALSE		7			-9.145	0.610189	Prot_kinase_dom::Ser-Thr/Tyr_kinase_cat_dom::Tyr_kinase_cat_dom				Library		-0.506916		0.201927		0.446926
ENSG00000103653	ENST00000439220	ENSP00000414764	CSK	CSK-002	PRINCIPAL:1	363	F	TTC								0.804878	13	86			FALSE		7			-13.231	0.558412	Prot_kinase_dom::Ser-Thr/Tyr_kinase_cat_dom::Tyr_kinase_cat_dom				Library		-0.517931		0.197569		0.43945
ENSG00000103653	ENST00000439220	ENSP00000414764	CSK	CSK-002	PRINCIPAL:1	364	S	TCC								0.807095	13	86			FALSE		7			-11.002	0.50315	Prot_kinase_dom::Ser-Thr/Tyr_kinase_cat_dom::Tyr_kinase_cat_dom				Library		-0.528425		0.192918		0.430962
ENSG00000103653	ENST00000439220	ENSP00000414764	CSK	CSK-002	PRINCIPAL:1	365	T	ACT	ACTCCACACGTCAGACTTAG	chr15	75094350	-	87	25	68	0.809313	13	86	12	74	FALSE	FALSE	7	4	0.571429	-10.694	0.470461	Prot_kinase_dom::Ser-Thr/Tyr_kinase_cat_dom::Tyr_kinase_cat_dom				Library	-0.35	-0.533836	0.280339	0.190809	0.45	0.420736
ENSG00000103653	ENST00000439220	ENSP00000414764	CSK	CSK-002	PRINCIPAL:1	366	K	AAG	ACTCCACACGTCAGACTTAG	chr15	75094350	-	87	25	68	0.81153	13	86	12	74	FALSE	FALSE	7	4	0.571429	-12.66	0.428994	Prot_kinase_dom::Ser-Thr/Tyr_kinase_cat_dom::Tyr_kinase_cat_dom				Library	-0.35	-0.54118	0.280339	0.187433	0.45	0.41037
ENSG00000103653	ENST00000439220	ENSP00000414764	CSK	CSK-002	PRINCIPAL:1	367	S	TCT	TCTCCACTAAGTCTGACGTG	chr15	75094358	+	85	98	80	0.813747	13	86	20	66	FALSE	FALSE	7	4	0.571429	-12.019	0.34661	Prot_kinase_dom::Ser-Thr/Tyr_kinase_cat_dom::Tyr_kinase_cat_dom				Library	-0.6	-0.551633	0.087803	0.18244	0.12	0.39973
ENSG00000103653	ENST00000439220	ENSP00000414764	CSK	CSK-002	PRINCIPAL:1	368	D	GAC	TCTCCACTAAGTCTGACGTG	chr15	75094358	+	85	98	80	0.815965	13	86	20	66	FALSE	FALSE	7	4	0.571429	-13.967	0.277206	Prot_kinase_dom::Ser-Thr/Tyr_kinase_cat_dom::Tyr_kinase_cat_dom				Library	-0.6	-0.562532	0.087803	0.177209	0.12	0.388182
ENSG00000103653	ENST00000439220	ENSP00000414764	CSK	CSK-002	PRINCIPAL:1	369	V	GTG								0.818182	13	86			FALSE		7			-11.719	0.200976	Prot_kinase_dom::Ser-Thr/Tyr_kinase_cat_dom::Tyr_kinase_cat_dom				Library		-0.56875		0.17423		0.376687
ENSG00000103653	ENST00000439220	ENSP00000414764	CSK	CSK-002	PRINCIPAL:1	370	W	TGG	AAGTCTGACGTGTGGAGTTT	chr15	75094366	+	66	19	74	0.820399	13	86	28	58	FALSE	FALSE	7	4	0.571429	-18.283	0.134183	Prot_kinase_dom::Ser-Thr/Tyr_kinase_cat_dom::Tyr_kinase_cat_dom				Library	-0.73	-0.578118	0.184221	0.169732	0.43	0.36484
ENSG00000103653	ENST00000439220	ENSP00000414764	CSK	CSK-002	PRINCIPAL:1	371	S	AGT	AAGTCTGACGTGTGGAGTTT	chr15	75094366	+	66	19	74	0.822616	13	86	28	58	FALSE	FALSE	7	4	0.571429	-12.424	0.088015	Prot_kinase_dom::Ser-Thr/Tyr_kinase_cat_dom::Tyr_kinase_cat_dom				Library	-0.73	-0.582327	0.184221	0.167717	0.43	0.353783
ENSG00000103653	ENST00000439220	ENSP00000414764	CSK	CSK-002	PRINCIPAL:1	372	F	TTC								0.824834	13	86			FALSE		7			-13.299	0.060854	Prot_kinase_dom::Ser-Thr/Tyr_kinase_cat_dom::Tyr_kinase_cat_dom				Library		-0.580975		0.168753		0.344744
ENSG00000103653	ENST00000439220	ENSP00000414764	CSK	CSK-002	PRINCIPAL:1	373	G	GGA								0.827051	13	86			FALSE		7			-14.275	0.045994	Prot_kinase_dom::Ser-Thr/Tyr_kinase_cat_dom::Tyr_kinase_cat_dom				Library		-0.578604		0.17055		0.337598
ENSG00000103653	ENST00000439220	ENSP00000414764	CSK	CSK-002	PRINCIPAL:1	374	I	ATC	GGAGTTTCGGAATCCTTCTC	chr15	75094379	+	79	8	70	0.829268	13	86	41	45	FALSE	TRUE	7	4	0.571429	-12.035	0.035938	Prot_kinase_dom::Ser-Thr/Tyr_kinase_cat_dom::Tyr_kinase_cat_dom				Library	-0.46	-0.579748	0.339847	0.170281	0.27	0.329788
ENSG00000103653	ENST00000439220	ENSP00000414764	CSK	CSK-002	PRINCIPAL:1	375	L	CTT	GGAGTTTCGGAATCCTTCTC	chr15	75094379	+	79	8	70	0.831486	13	86	41	45	FALSE	TRUE	7	4	0.571429	-12.016	0.031756	Prot_kinase_dom::Ser-Thr/Tyr_kinase_cat_dom::Tyr_kinase_cat_dom				Library	-0.46	-0.580164	0.339847	0.170321	0.27	0.322794
ENSG00000103653	ENST00000439220	ENSP00000414764	CSK	CSK-002	PRINCIPAL:1	375	L	CTT	GAGTTTCGGAATCCTTCTCT	chr15	75094380	+	74	66	65	0.831486	13	86	42	44	FALSE	TRUE	7	4	0.571429	-12.016	0.031756	Prot_kinase_dom::Ser-Thr/Tyr_kinase_cat_dom::Tyr_kinase_cat_dom				Library	-0.68	-0.580164	0.273942	0.170321	0.44	0.322794
ENSG00000103653	ENST00000439220	ENSP00000414764	CSK	CSK-002	PRINCIPAL:1	375	L	CTT	AGGAGTAGATTTCCCAGAGA	chr15	75094381	-	31	59	65	0.831486	13	86	43	43	FALSE	TRUE	7	4	0.571429	-12.016	0.031756	Prot_kinase_dom::Ser-Thr/Tyr_kinase_cat_dom::Tyr_kinase_cat_dom				Library	-0.91	-0.580164	-0.543743	0.170321	-0.12	0.322794
ENSG00000103653	ENST00000439220	ENSP00000414764	CSK	CSK-002	PRINCIPAL:1	376	L	CTC	GAGTTTCGGAATCCTTCTCT	chr15	75094380	+	74	66	65	0.833703	13	86	42	44	FALSE	TRUE	7	4	0.571429	-12.016	0.033962	Prot_kinase_dom::Ser-Thr/Tyr_kinase_cat_dom::Tyr_kinase_cat_dom				Library	-0.68	-0.576148	0.273942	0.172861	0.44	0.319815
ENSG00000103653	ENST00000439220	ENSP00000414764	CSK	CSK-002	PRINCIPAL:1	376	L	CTC	AGGAGTAGATTTCCCAGAGA	chr15	75094381	-	31	59	65	0.833703	13	86	43	43	FALSE	TRUE	7	4	0.571429	-12.016	0.033962	Prot_kinase_dom::Ser-Thr/Tyr_kinase_cat_dom::Tyr_kinase_cat_dom				Library	-0.91	-0.576148	-0.543743	0.172861	-0.12	0.319815
ENSG00000103653	ENST00000439220	ENSP00000414764	CSK	CSK-002	PRINCIPAL:1	377	W	TGG								0.83592	13	86			FALSE		7			-18.566	0.033441	Prot_kinase_dom::Ser-Thr/Tyr_kinase_cat_dom::Tyr_kinase_cat_dom				Library		-0.575203		0.173478		0.314815
ENSG00000103653	ENST00000439220	ENSP00000414764	CSK	CSK-002	PRINCIPAL:1	378	E	GAA								0.838137	13	86			FALSE		7			-13.074	0.038929	Prot_kinase_dom::Ser-Thr/Tyr_kinase_cat_dom::Tyr_kinase_cat_dom				Library		-0.576817		0.172257		0.306695
ENSG00000103653	ENST00000439220	ENSP00000414764	CSK	CSK-002	PRINCIPAL:1	379	I	ATC								0.840355	13	86			FALSE		7			-11.495	0.047472	Prot_kinase_dom::Ser-Thr/Tyr_kinase_cat_dom::Tyr_kinase_cat_dom				Library		-0.576752		0.171598		0.299178
ENSG00000103653	ENST00000439220	ENSP00000414764	CSK	CSK-002	PRINCIPAL:1	380	Y	TAC	CTCTGGGAAATCTACTCCTT	chr15	75094396	+	70	8	79	0.842572	13	86	58	28	FALSE	TRUE	7	4	0.571429	-14.143	0.054644	Prot_kinase_dom::Ser-Thr/Tyr_kinase_cat_dom::Tyr_kinase_cat_dom				Library	-0.61	-0.572096	0.215013	0.173731	0.62	0.296874
ENSG00000103653	ENST00000439220	ENSP00000414764	CSK	CSK-002	PRINCIPAL:1	380	Y	TAC	TCTGGGAAATCTACTCCTTT	chr15	75094397	+	61	16	77	0.842572	13	86	59	27	FALSE	TRUE	7	4	0.571429	-14.143	0.054644	Prot_kinase_dom::Ser-Thr/Tyr_kinase_cat_dom::Tyr_kinase_cat_dom				Library	-0.59	-0.572096	0.217266	0.173731	0.24	0.296874
ENSG00000103653	ENST00000439220	ENSP00000414764	CSK	CSK-002	PRINCIPAL:1	381	S	TCC	CTCTGGGAAATCTACTCCTT	chr15	75094396	+	70	8	79	0.844789	13	86	58	28	FALSE	TRUE	7	4	0.571429	-12.23	0.061207	Prot_kinase_dom::Ser-Thr/Tyr_kinase_cat_dom::Tyr_kinase_cat_dom				Library	-0.61	-0.566119	0.215013	0.176481	0.62	0.295914
ENSG00000103653	ENST00000439220	ENSP00000414764	CSK	CSK-002	PRINCIPAL:1	381	S	TCC	TCTGGGAAATCTACTCCTTT	chr15	75094397	+	61	16	77	0.844789	13	86	59	27	FALSE	TRUE	7	4	0.571429	-12.23	0.061207	Prot_kinase_dom::Ser-Thr/Tyr_kinase_cat_dom::Tyr_kinase_cat_dom				Library	-0.59	-0.566119	0.217266	0.176481	0.24	0.295914
ENSG00000103653	ENST00000439220	ENSP00000414764	CSK	CSK-002	PRINCIPAL:1	382	F	TTT	TGGATAAGGCACTCGCCCAA	chr15	75094401	-	82	81	76	0.847007	13	86	63	23	FALSE	TRUE	7	4	0.571429	-13.175	0.079005	Prot_kinase_dom::Ser-Thr/Tyr_kinase_cat_dom::Tyr_kinase_cat_dom				Library	-0.77	-0.558846	0.121603	0.179858	0.18	0.296313
ENSG00000103653	ENST00000439220	ENSP00000414764	CSK	CSK-002	PRINCIPAL:1	383	G	GGG	TGGATAAGGCACTCGCCCAA	chr15	75094401	-	82	81	76	0.849224	13	86	63	23	FALSE	TRUE	7	4	0.571429	-13.931	0.105321	Prot_kinase_dom::Ser-Thr/Tyr_kinase_cat_dom::Tyr_kinase_cat_dom				Library	-0.77	-0.55037	0.121603	0.183843	0.18	0.298097
ENSG00000103653	ENST00000439220	ENSP00000414764	CSK	CSK-002	PRINCIPAL:1	384	R	CGA								0.851441	13	86			FALSE		7			-12.865	0.125102	Prot_kinase_dom::Ser-Thr/Tyr_kinase_cat_dom::Tyr_kinase_cat_dom				Library		-0.540802		0.188401		0.301356
ENSG00000103653	ENST00000439220	ENSP00000414764	CSK	CSK-002	PRINCIPAL:1	385	V	GTG								0.853659	13	86			FALSE		7			-11.127	0.152253	Prot_kinase_dom::Ser-Thr/Tyr_kinase_cat_dom::Tyr_kinase_cat_dom				Library		-0.529352		0.193907		0.30346
ENSG00000103653	ENST00000439220	ENSP00000414764	CSK	CSK-002	PRINCIPAL:1	386	P	CCT	ATACTCACAATTCTTGGATA	chr15	75094415	-	66	46	58	0.855876	13	86	77	9	FALSE	TRUE	7	4	0.571429	-14.602	0.182568	Prot_kinase_dom::Ser-Thr/Tyr_kinase_cat_dom::Tyr_kinase_cat_dom				Library		-0.51844		0.199303		0.310065
ENSG00000103653	ENST00000439220	ENSP00000414764	CSK	CSK-002	PRINCIPAL:1	387	Y	TAT	ATACTCACAATTCTTGGATA	chr15	75094415	-	66	46	58	0.858093	13	86	77	9	FALSE	TRUE	7	4	0.571429	-14.511	0.193021	Prot_kinase_dom::Ser-Thr/Tyr_kinase_cat_dom::Tyr_kinase_cat_dom				Library		-0.507521		0.204197		0.320449
ENSG00000103653	ENST00000439220	ENSP00000414764	CSK	CSK-002	PRINCIPAL:1	388	P	CCA	GTACCCATACTCACAATTCT	chr15	75094421	-	79	19	68	0.86031	13	86	83	3	FALSE	TRUE	7	4	0.571429	-14.213	0.218569	Prot_kinase_dom::Ser-Thr/Tyr_kinase_cat_dom::Tyr_kinase_cat_dom				Library	-0.38	-0.495901	0.30798	0.209444	0.39	0.32926
ENSG00000103653	ENST00000439220	ENSP00000414764	CSK	CSK-002	PRINCIPAL:1	389	R	AGA	GTACCCATACTCACAATTCT	chr15	75094421	-	79	19	68	0.862528	13	86	83	3	FALSE	TRUE	7	4	0.571429	-11.91	0.249664	Prot_kinase_dom::Ser-Thr/Tyr_kinase_cat_dom::Tyr_kinase_cat_dom				Library	-0.38	-0.484073	0.30798	0.214542	0.39	0.338878
ENSG00000103653	ENST00000439220	ENSP00000414764	CSK	CSK-002	PRINCIPAL:1	390	I	ATT								0.864745	13	86			FALSE		7			-10.189	0.257343	Prot_kinase_dom::Ser-Thr/Tyr_kinase_cat_dom::Tyr_kinase_cat_dom				Library		-0.47137		0.218654		0.351466
ENSG00000103653	ENST00000439220	ENSP00000414764	CSK	CSK-002	PRINCIPAL:1	391	P	CCC	CCCCTGGCCACAGCCCCTGA	chr15	75094675	+	27	56	66	0.866962	14	182	3	179	FALSE	TRUE	7	4	0.571429	-10.383	0.282004	Prot_kinase_dom::Ser-Thr/Tyr_kinase_cat_dom::Tyr_kinase_cat_dom				Library	-0.18	-0.458848	0.539829	0.221942	0.39	0.363586
ENSG00000103653	ENST00000439220	ENSP00000414764	CSK	CSK-002	PRINCIPAL:1	391	P	CCC	CGAGGGACGACGTCCTTCAG	chr15	75094677	-	94	86	70	0.866962	14	182	5	177	FALSE	TRUE	7	4	0.571429	-10.383	0.282004	Prot_kinase_dom::Ser-Thr/Tyr_kinase_cat_dom::Tyr_kinase_cat_dom				Library	-0.36	-0.458848	0.317521	0.221942	0.02	0.363586
ENSG00000103653	ENST00000439220	ENSP00000414764	CSK	CSK-002	PRINCIPAL:1	392	L	CTG	CCCCTGGCCACAGCCCCTGA	chr15	75094675	+	27	56	66	0.86918	14	182	3	179	FALSE	TRUE	7	4	0.571429	-9.395	0.311726	Prot_kinase_dom::Ser-Thr/Tyr_kinase_cat_dom::Tyr_kinase_cat_dom				Library	-0.18	-0.447485	0.539829	0.226924	0.39	0.371851
ENSG00000103653	ENST00000439220	ENSP00000414764	CSK	CSK-002	PRINCIPAL:1	392	L	CTG	CGAGGGACGACGTCCTTCAG	chr15	75094677	-	94	86	70	0.86918	14	182	5	177	FALSE	TRUE	7	4	0.571429	-9.395	0.311726	Prot_kinase_dom::Ser-Thr/Tyr_kinase_cat_dom::Tyr_kinase_cat_dom				Library	-0.36	-0.447485	0.317521	0.226924	0.02	0.371851
ENSG00000103653	ENST00000439220	ENSP00000414764	CSK	CSK-002	PRINCIPAL:1	392	L	CTG	CCGAGGGACGACGTCCTTCA	chr15	75094678	-	93	38	66	0.86918	14	182	6	176	FALSE	TRUE	7	4	0.571429	-9.395	0.311726	Prot_kinase_dom::Ser-Thr/Tyr_kinase_cat_dom::Tyr_kinase_cat_dom				Library	0.09	-0.447485	0.406209	0.226924	0.7	0.371851
ENSG00000103653	ENST00000439220	ENSP00000414764	CSK	CSK-002	PRINCIPAL:1	392	L	CTG	CCCGAGGGACGACGTCCTTC	chr15	75094679	-	92	8	65	0.86918	14	182	7	175	FALSE	TRUE	7	4	0.571429	-9.395	0.311726	Prot_kinase_dom::Ser-Thr/Tyr_kinase_cat_dom::Tyr_kinase_cat_dom				Library		-0.447485		0.226924		0.371851
ENSG00000103653	ENST00000439220	ENSP00000414764	CSK	CSK-002	PRINCIPAL:1	393	K	AAG	CCGAGGGACGACGTCCTTCA	chr15	75094678	-	93	38	66	0.871397	14	182	6	176	FALSE	TRUE	7	4	0.571429	-8.333	0.32459	Prot_kinase_dom::Ser-Thr/Tyr_kinase_cat_dom::Tyr_kinase_cat_dom				Library	0.09	-0.435864	0.406209	0.231963	0.7	0.380907
ENSG00000103653	ENST00000439220	ENSP00000414764	CSK	CSK-002	PRINCIPAL:1	393	K	AAG	CCCGAGGGACGACGTCCTTC	chr15	75094679	-	92	8	65	0.871397	14	182	7	175	FALSE	TRUE	7	4	0.571429	-8.333	0.32459	Prot_kinase_dom::Ser-Thr/Tyr_kinase_cat_dom::Tyr_kinase_cat_dom				Library		-0.435864		0.231963		0.380907
ENSG00000103653	ENST00000439220	ENSP00000414764	CSK	CSK-002	PRINCIPAL:1	394	D	GAC								0.873614	14	182			FALSE		7			-9.785	0.305614	Prot_kinase_dom::Ser-Thr/Tyr_kinase_cat_dom::Tyr_kinase_cat_dom				Library		-0.424878		0.235072		0.390912
ENSG00000103653	ENST00000439220	ENSP00000414764	CSK	CSK-002	PRINCIPAL:1	395	V	GTC	CCCTGAAGGACGTCGTCCCT	chr15	75094689	+	96	21	54	0.875831	14	182	17	165	FALSE	TRUE	7	4	0.571429	-8.388	0.309752	Prot_kinase_dom::Ser-Thr/Tyr_kinase_cat_dom::Tyr_kinase_cat_dom				Library	-0.38	-0.416015	0.184398	0.235847	0.48	0.39993
ENSG00000103653	ENST00000439220	ENSP00000414764	CSK	CSK-002	PRINCIPAL:1	396	V	GTC	CCCTGAAGGACGTCGTCCCT	chr15	75094689	+	96	21	54	0.878049	14	182	17	165	FALSE	TRUE	7	4	0.571429	-8.388	0.316721	Prot_kinase_dom::Ser-Thr/Tyr_kinase_cat_dom::Tyr_kinase_cat_dom				Library	-0.38	-0.409121	0.184398	0.236071	0.48	0.40706
ENSG00000103653	ENST00000439220	ENSP00000414764	CSK	CSK-002	PRINCIPAL:1	396	V	GTC	CCTGAAGGACGTCGTCCCTC	chr15	75094690	+	88	46	47	0.878049	14	182	18	164	FALSE	TRUE	7	4	0.571429	-8.388	0.316721	Prot_kinase_dom::Ser-Thr/Tyr_kinase_cat_dom::Tyr_kinase_cat_dom				Library	-0.71	-0.409121	-0.0725579	0.236071	0.31	0.40706
ENSG00000103653	ENST00000439220	ENSP00000414764	CSK	CSK-002	PRINCIPAL:1	397	P	CCT	CCTGAAGGACGTCGTCCCTC	chr15	75094690	+	88	46	47	0.880266	14	182	18	164	FALSE	TRUE	7	4	0.571429	-7.257	0.32944	Prot_kinase_dom::Ser-Thr/Tyr_kinase_cat_dom::Tyr_kinase_cat_dom				Library	-0.71	-0.403731	-0.0725579	0.235957	0.31	0.412738
ENSG00000103653	ENST00000439220	ENSP00000414764	CSK	CSK-002	PRINCIPAL:1	397	P	CCT	GAAGGACGTCGTCCCTCGGG	chr15	75094693	+	91	69	53	0.880266	14	182	21	161	FALSE	TRUE	7	4	0.571429	-7.257	0.32944	Prot_kinase_dom::Ser-Thr/Tyr_kinase_cat_dom::Tyr_kinase_cat_dom				Library		-0.403731		0.235957		0.412738
ENSG00000103653	ENST00000439220	ENSP00000414764	CSK	CSK-002	PRINCIPAL:1	397	P	CCT	TGTAGCCCTTCTCCACCCGA	chr15	75094694	-	85	94	54	0.880266	14	182	22	160	FALSE	TRUE	7	4	0.571429	-7.257	0.32944	Prot_kinase_dom::Ser-Thr/Tyr_kinase_cat_dom::Tyr_kinase_cat_dom				Library	-0.49	-0.403731	0.106676	0.235957	0.05	0.412738
ENSG00000103653	ENST00000439220	ENSP00000414764	CSK	CSK-002	PRINCIPAL:1	397	P	CCT	TTGTAGCCCTTCTCCACCCG	chr15	75094695	-	76	72	54	0.880266	14	182	23	159	FALSE	TRUE	7	4	0.571429	-7.257	0.32944	Prot_kinase_dom::Ser-Thr/Tyr_kinase_cat_dom::Tyr_kinase_cat_dom				Library	-0.83	-0.403731	0.316934	0.235957	0.34	0.412738
ENSG00000103653	ENST00000439220	ENSP00000414764	CSK	CSK-002	PRINCIPAL:1	398	R	CGG	GAAGGACGTCGTCCCTCGGG	chr15	75094693	+	91	69	53	0.882483	14	182	21	161	FALSE	TRUE	7	4	0.571429	-7.683	0.367852	Prot_kinase_dom::Ser-Thr/Tyr_kinase_cat_dom::Tyr_kinase_cat_dom				Library		-0.399404		0.235634		0.417388
ENSG00000103653	ENST00000439220	ENSP00000414764	CSK	CSK-002	PRINCIPAL:1	398	R	CGG	TGTAGCCCTTCTCCACCCGA	chr15	75094694	-	85	94	54	0.882483	14	182	22	160	FALSE	TRUE	7	4	0.571429	-7.683	0.367852	Prot_kinase_dom::Ser-Thr/Tyr_kinase_cat_dom::Tyr_kinase_cat_dom				Library	-0.49	-0.399404	0.106676	0.235634	0.05	0.417388
ENSG00000103653	ENST00000439220	ENSP00000414764	CSK	CSK-002	PRINCIPAL:1	398	R	CGG	TTGTAGCCCTTCTCCACCCG	chr15	75094695	-	76	72	54	0.882483	14	182	23	159	FALSE	TRUE	7	4	0.571429	-7.683	0.367852	Prot_kinase_dom::Ser-Thr/Tyr_kinase_cat_dom::Tyr_kinase_cat_dom				Library	-0.83	-0.399404	0.316934	0.235634	0.34	0.417388
ENSG00000103653	ENST00000439220	ENSP00000414764	CSK	CSK-002	PRINCIPAL:1	399	V	GTG	CGTCGTCCCTCGGGTGGAGA	chr15	75094699	+	82	30	54	0.884701	14	182	27	155	FALSE	TRUE	7	4	0.571429	-9.723	0.431213	Prot_kinase_dom::Ser-Thr/Tyr_kinase_cat_dom::Tyr_kinase_cat_dom				Library	-0.44	-0.39322	0.0896103	0.236714	0.54	0.423463
ENSG00000103653	ENST00000439220	ENSP00000414764	CSK	CSK-002	PRINCIPAL:1	399	V	GTG	GTCGTCCCTCGGGTGGAGAA	chr15	75094700	+	65	66	57	0.884701	14	182	28	154	FALSE	TRUE	7	4	0.571429	-9.723	0.431213	Prot_kinase_dom::Ser-Thr/Tyr_kinase_cat_dom::Tyr_kinase_cat_dom				Library	-0.14	-0.39322	0.206652	0.236714	0.19	0.423463
ENSG00000103653	ENST00000439220	ENSP00000414764	CSK	CSK-002	PRINCIPAL:1	400	E	GAG	CGTCGTCCCTCGGGTGGAGA	chr15	75094699	+	82	30	54	0.886918	14	182	27	155	FALSE	TRUE	7	4	0.571429	-10.35	0.476636	Prot_kinase_dom::Ser-Thr/Tyr_kinase_cat_dom::Tyr_kinase_cat_dom				Library	-0.44	-0.390753	0.0896103	0.235962	0.54	0.427027
ENSG00000103653	ENST00000439220	ENSP00000414764	CSK	CSK-002	PRINCIPAL:1	400	E	GAG	GTCGTCCCTCGGGTGGAGAA	chr15	75094700	+	65	66	57	0.886918	14	182	28	154	FALSE	TRUE	7	4	0.571429	-10.35	0.476636	Prot_kinase_dom::Ser-Thr/Tyr_kinase_cat_dom::Tyr_kinase_cat_dom				Library	-0.14	-0.390753	0.206652	0.235962	0.19	0.427027
ENSG00000103653	ENST00000439220	ENSP00000414764	CSK	CSK-002	PRINCIPAL:1	401	K	AAG								0.889135	14	182			FALSE		7			-9.735	0.500533	Prot_kinase_dom::Ser-Thr/Tyr_kinase_cat_dom::Tyr_kinase_cat_dom				Library		-0.382838		0.237882		0.434872
ENSG00000103653	ENST00000439220	ENSP00000414764	CSK	CSK-002	PRINCIPAL:1	402	G	GGC								0.891353	14	182			FALSE		7			-11.39	0.532978	Prot_kinase_dom::Ser-Thr/Tyr_kinase_cat_dom::Tyr_kinase_cat_dom				Library		-0.37582		0.239046		0.442274
ENSG00000103653	ENST00000439220	ENSP00000414764	CSK	CSK-002	PRINCIPAL:1	403	Y	TAC	GGTGGAGAAGGGCTACAAGA	chr15	75094711	+	61	66	66	0.89357	14	182	39	143	FALSE	TRUE	7	4	0.571429	-11.99	0.533489	Prot_kinase_dom::Ser-Thr/Tyr_kinase_cat_dom::Tyr_kinase_cat_dom				Library	-0.71	-0.372792	0.364556	0.238413	0.65	0.447007
ENSG00000103653	ENST00000439220	ENSP00000414764	CSK	CSK-002	PRINCIPAL:1	404	K	AAG	GGTGGAGAAGGGCTACAAGA	chr15	75094711	+	61	66	66	0.895787	14	182	39	143	FALSE	TRUE	7	4	0.571429	-8.807	0.540916	Prot_kinase_dom::Ser-Thr/Tyr_kinase_cat_dom::Tyr_kinase_cat_dom				Library	-0.71	-0.37487	0.364556	0.235774	0.65	0.44908
ENSG00000103653	ENST00000439220	ENSP00000414764	CSK	CSK-002	PRINCIPAL:1	405	M	ATG								0.898004	14	182			FALSE		7			-10.228	0.551594	Prot_kinase_dom::Ser-Thr/Tyr_kinase_cat_dom::Tyr_kinase_cat_dom				Library		-0.379471		0.231864		0.450468
ENSG00000103653	ENST00000439220	ENSP00000414764	CSK	CSK-002	PRINCIPAL:1	406	D	GAT								0.900222	14	182			FALSE		7			-8.912	0.547817	Prot_kinase_dom::Ser-Thr/Tyr_kinase_cat_dom::Tyr_kinase_cat_dom				Library		-0.385481		0.227096		0.451394
ENSG00000103653	ENST00000439220	ENSP00000414764	CSK	CSK-002	PRINCIPAL:1	407	A	GCC	TACAAGATGGATGCCCCCGA	chr15	75094724	+	95	78	63	0.902439	14	182	52	130	FALSE	TRUE	7	4	0.571429	-8.393	0.524065	Prot_kinase_dom::Ser-Thr/Tyr_kinase_cat_dom::Tyr_kinase_cat_dom				Library	-0.33	-0.391588	-0.108049	0.22208	0.52	0.452155
ENSG00000103653	ENST00000439220	ENSP00000414764	CSK	CSK-002	PRINCIPAL:1	408	P	CCC	TACAAGATGGATGCCCCCGA	chr15	75094724	+	95	78	63	0.904656	14	182	52	130	FALSE	TRUE	7	4	0.571429	-11.98	0.489095	Prot_kinase_dom::Ser-Thr/Tyr_kinase_cat_dom::Tyr_kinase_cat_dom				Library	-0.33	-0.396855	-0.108049	0.217292	0.52	0.452973
ENSG00000103653	ENST00000439220	ENSP00000414764	CSK	CSK-002	PRINCIPAL:1	408	P	CCC	TGCGGGCGGGCAGCCGTCGG	chr15	75094726	-	83	40	65	0.904656	14	182	54	128	FALSE	TRUE	7	4	0.571429	-11.98	0.489095	Prot_kinase_dom::Ser-Thr/Tyr_kinase_cat_dom::Tyr_kinase_cat_dom				Library	0.11	-0.396855	0.535898	0.217292	0.48	0.452973
ENSG00000103653	ENST00000439220	ENSP00000414764	CSK	CSK-002	PRINCIPAL:1	408	P	CCC	CTGCGGGCGGGCAGCCGTCG	chr15	75094727	-	84	14	64	0.904656	14	182	55	127	FALSE	TRUE	7	4	0.571429	-11.98	0.489095	Prot_kinase_dom::Ser-Thr/Tyr_kinase_cat_dom::Tyr_kinase_cat_dom				Library	-0.34	-0.396855	0.332273	0.217292	0.77	0.452973
ENSG00000103653	ENST00000439220	ENSP00000414764	CSK	CSK-002	PRINCIPAL:1	408	P	CCC	ACTGCGGGCGGGCAGCCGTC	chr15	75094728	-	81	6	66	0.904656	14	182	56	126	FALSE	TRUE	7	4	0.571429	-11.98	0.489095	Prot_kinase_dom::Ser-Thr/Tyr_kinase_cat_dom::Tyr_kinase_cat_dom				Library	-0.15	-0.396855	0.528287	0.217292	0.91	0.452973
ENSG00000103653	ENST00000439220	ENSP00000414764	CSK	CSK-002	PRINCIPAL:1	409	D	GAC	TGCGGGCGGGCAGCCGTCGG	chr15	75094726	-	83	40	65	0.906874	14	182	54	128	FALSE	TRUE	7	4	0.571429	-9.84	0.462936	Prot_kinase_dom::Ser-Thr/Tyr_kinase_cat_dom::Tyr_kinase_cat_dom				Library	0.11	-0.400775	0.535898	0.213014	0.48	0.453971
ENSG00000103653	ENST00000439220	ENSP00000414764	CSK	CSK-002	PRINCIPAL:1	409	D	GAC	CTGCGGGCGGGCAGCCGTCG	chr15	75094727	-	84	14	64	0.906874	14	182	55	127	FALSE	TRUE	7	4	0.571429	-9.84	0.462936	Prot_kinase_dom::Ser-Thr/Tyr_kinase_cat_dom::Tyr_kinase_cat_dom				Library	-0.34	-0.400775	0.332273	0.213014	0.77	0.453971
ENSG00000103653	ENST00000439220	ENSP00000414764	CSK	CSK-002	PRINCIPAL:1	409	D	GAC	ACTGCGGGCGGGCAGCCGTC	chr15	75094728	-	81	6	66	0.906874	14	182	56	126	FALSE	TRUE	7	4	0.571429	-9.84	0.462936	Prot_kinase_dom::Ser-Thr/Tyr_kinase_cat_dom::Tyr_kinase_cat_dom				Library	-0.15	-0.400775	0.528287	0.213014	0.91	0.453971
ENSG00000103653	ENST00000439220	ENSP00000414764	CSK	CSK-002	PRINCIPAL:1	409	D	GAC	GACTGCGGGCGGGCAGCCGT	chr15	75094729	-	76	27	63	0.906874	14	182	57	125	FALSE	TRUE	7	4	0.571429	-9.84	0.462936	Prot_kinase_dom::Ser-Thr/Tyr_kinase_cat_dom::Tyr_kinase_cat_dom				Library	-0.28	-0.400775	0.528525	0.213014	0.56	0.453971
ENSG00000103653	ENST00000439220	ENSP00000414764	CSK	CSK-002	PRINCIPAL:1	410	G	GGC	GACTGCGGGCGGGCAGCCGT	chr15	75094729	-	76	27	63	0.909091	14	182	57	125	FALSE	TRUE	7	4	0.571429	-10.494	0.418396	Prot_kinase_dom::Ser-Thr/Tyr_kinase_cat_dom::Tyr_kinase_cat_dom				Library	-0.28	-0.403149	0.528525	0.209376	0.56	0.455197
ENSG00000103653	ENST00000439220	ENSP00000414764	CSK	CSK-002	PRINCIPAL:1	411	C	TGC								0.911308	14	182			FALSE		7			-12.896	0.381663	Prot_kinase_dom::Ser-Thr/Tyr_kinase_cat_dom::Tyr_kinase_cat_dom				Library		-0.403958		0.206412		0.456652
ENSG00000103653	ENST00000439220	ENSP00000414764	CSK	CSK-002	PRINCIPAL:1	412	P	CCG	TGACTTCATAGACTGCGGGC	chr15	75094739	-	91	92	62	0.913525	14	182	67	115	FALSE	TRUE	7	4	0.571429	-7.502	0.355347	Prot_kinase_dom::Ser-Thr/Tyr_kinase_cat_dom::Tyr_kinase_cat_dom				Library	-0.68	-0.403263	-0.238971	0.204108	0.58	0.458317
ENSG00000103653	ENST00000439220	ENSP00000414764	CSK	CSK-002	PRINCIPAL:1	412	P	CCG	ATGACTTCATAGACTGCGGG	chr15	75094740	-	89	86	59	0.913525	14	182	68	114	FALSE	TRUE	7	4	0.571429	-7.502	0.355347	Prot_kinase_dom::Ser-Thr/Tyr_kinase_cat_dom::Tyr_kinase_cat_dom				Library	-0.16	-0.403263	0.0934032	0.204108	0.23	0.458317
ENSG00000103653	ENST00000439220	ENSP00000414764	CSK	CSK-002	PRINCIPAL:1	413	P	CCC	TGACTTCATAGACTGCGGGC	chr15	75094739	-	91	92	62	0.915743	14	182	67	115	FALSE	TRUE	7	4	0.571429	-7.502	0.317092	Prot_kinase_dom::Ser-Thr/Tyr_kinase_cat_dom::Tyr_kinase_cat_dom				Library	-0.68	-0.401161	-0.238971	0.20243	0.58	0.460163
ENSG00000103653	ENST00000439220	ENSP00000414764	CSK	CSK-002	PRINCIPAL:1	413	P	CCC	ATGACTTCATAGACTGCGGG	chr15	75094740	-	89	86	59	0.915743	14	182	68	114	FALSE	TRUE	7	4	0.571429	-7.502	0.317092	Prot_kinase_dom::Ser-Thr/Tyr_kinase_cat_dom::Tyr_kinase_cat_dom				Library	-0.16	-0.401161	0.0934032	0.20243	0.23	0.460163
ENSG00000103653	ENST00000439220	ENSP00000414764	CSK	CSK-002	PRINCIPAL:1	413	P	CCC	TTCATGACTTCATAGACTGC	chr15	75094743	-	73	59	65	0.915743	14	182	71	111	FALSE	TRUE	7	4	0.571429	-7.502	0.317092	Prot_kinase_dom::Ser-Thr/Tyr_kinase_cat_dom::Tyr_kinase_cat_dom				Library	-0.67	-0.401161	-0.116753	0.20243	0.12	0.460163
ENSG00000103653	ENST00000439220	ENSP00000414764	CSK	CSK-002	PRINCIPAL:1	414	A	GCA	TTCATGACTTCATAGACTGC	chr15	75094743	-	73	59	65	0.91796	14	182	71	111	FALSE	TRUE	7	4	0.571429	-6.422	0.280433	Prot_kinase_dom::Ser-Thr/Tyr_kinase_cat_dom::Tyr_kinase_cat_dom				Library	-0.67	-0.397754	-0.116753	0.201339	0.12	0.462163
ENSG00000103653	ENST00000439220	ENSP00000414764	CSK	CSK-002	PRINCIPAL:1	414	A	GCA	CTTCATGACTTCATAGACTG	chr15	75094744	-	73	89	55	0.91796	14	182	72	110	FALSE	TRUE	7	4	0.571429	-6.422	0.280433	Prot_kinase_dom::Ser-Thr/Tyr_kinase_cat_dom::Tyr_kinase_cat_dom				Library	-0.23	-0.397754	0.573337	0.201339	0.71	0.462163
ENSG00000103653	ENST00000439220	ENSP00000414764	CSK	CSK-002	PRINCIPAL:1	415	V	GTC	CTTCATGACTTCATAGACTG	chr15	75094744	-	73	89	55	0.920177	14	182	72	110	FALSE	TRUE	7	4	0.571429	-8.562	0.239609	Prot_kinase_dom::Ser-Thr/Tyr_kinase_cat_dom::Tyr_kinase_cat_dom				Library	-0.23	-0.393137	0.573337	0.200801	0.71	0.46429
ENSG00000103653	ENST00000439220	ENSP00000414764	CSK	CSK-002	PRINCIPAL:1	416	Y	TAT								0.922395	14	182			FALSE		7			-10.955	0.208043	Prot_kinase_dom::Ser-Thr/Tyr_kinase_cat_dom::Tyr_kinase_cat_dom				Library		-0.387394		0.200781		0.46652
ENSG00000103653	ENST00000439220	ENSP00000414764	CSK	CSK-002	PRINCIPAL:1	417	E	GAA								0.924612	14	182			FALSE		7			-7.795	0.181704	Prot_kinase_dom::Ser-Thr/Tyr_kinase_cat_dom::Tyr_kinase_cat_dom				Library		-0.380599		0.201249		0.468833
ENSG00000103653	ENST00000439220	ENSP00000414764	CSK	CSK-002	PRINCIPAL:1	418	V	GTC								0.926829	14	182			FALSE		7			-8.776	0.174225	Prot_kinase_dom::Ser-Thr/Tyr_kinase_cat_dom::Tyr_kinase_cat_dom				Library		-0.372816		0.202178		0.471208
ENSG00000103653	ENST00000439220	ENSP00000414764	CSK	CSK-002	PRINCIPAL:1	419	M	ATG								0.929047	14	182			FALSE		7			-10.382	0.159334	Prot_kinase_dom::Ser-Thr/Tyr_kinase_cat_dom::Tyr_kinase_cat_dom				Library		-0.364099		0.203546		0.47363
ENSG00000103653	ENST00000439220	ENSP00000414764	CSK	CSK-002	PRINCIPAL:1	420	K	AAG	ATGAAGTCATGAAGAACTGC	chr15	75094764	+	52	56	68	0.931264	14	182	92	90	FALSE	TRUE	7	4	0.571429	-9.024	0.137731	Prot_kinase_dom::Ser-Thr/Tyr_kinase_cat_dom::Tyr_kinase_cat_dom				Library	-0.56	-0.35449	-0.0790943	0.205334	0.2	0.476085
ENSG00000103653	ENST00000439220	ENSP00000414764	CSK	CSK-002	PRINCIPAL:1	421	N	AAC	ATGAAGTCATGAAGAACTGC	chr15	75094764	+	52	56	68	0.933481	14	182	92	90	FALSE	TRUE	7	4	0.571429	-7.103	0.142074	Prot_kinase_dom::Ser-Thr/Tyr_kinase_cat_dom::Tyr_kinase_cat_dom				Library	-0.56	-0.344028	-0.0790943	0.207527	0.2	0.478562
ENSG00000103653	ENST00000439220	ENSP00000414764	CSK	CSK-002	PRINCIPAL:1	422	C	TGC								0.935698	14	182			FALSE		7			-11.376	0.127185	Prot_kinase_dom::Ser-Thr/Tyr_kinase_cat_dom::Tyr_kinase_cat_dom				Library		-0.33274		0.210112		0.481051
ENSG00000103653	ENST00000439220	ENSP00000414764	CSK	CSK-002	PRINCIPAL:1	423	W	TGG	CATGAAGAACTGCTGGCACC	chr15	75094771	+	46	50	69	0.937916	14	182	99	83	FALSE	TRUE	7	4	0.571429	-14.868	0.130369	Prot_kinase_dom::Ser-Thr/Tyr_kinase_cat_dom::Tyr_kinase_cat_dom				Library	-0.43	-0.320649	0.288202	0.213081	0.51	0.483547
ENSG00000103653	ENST00000439220	ENSP00000414764	CSK	CSK-002	PRINCIPAL:1	424	H	CAC	CATGAAGAACTGCTGGCACC	chr15	75094771	+	46	50	69	0.940133	14	182	99	83	FALSE	TRUE	7	4	0.571429	-7.364	0.133117	Prot_kinase_dom::Ser-Thr/Tyr_kinase_cat_dom::Tyr_kinase_cat_dom				Library	-0.43	-0.307773	0.288202	0.216427	0.51	0.486044
ENSG00000103653	ENST00000439220	ENSP00000414764	CSK	CSK-002	PRINCIPAL:1	425	L	CTG	AGGGCCGCATGGCGGCGTCC	chr15	75094778	-	81	32	68	0.94235	14	182	106	76	FALSE	TRUE	7	4	0.571429	-8.562	0.141582	Prot_kinase_dom::Ser-Thr/Tyr_kinase_cat_dom::Tyr_kinase_cat_dom				Library	0.32	-0.294125	0.469417	0.220145	0.73	0.488538
ENSG00000103653	ENST00000439220	ENSP00000414764	CSK	CSK-002	PRINCIPAL:1	426	D	GAC	AGGGCCGCATGGCGGCGTCC	chr15	75094778	-	81	32	68	0.944568	14	182	106	76	FALSE	TRUE	7	4	0.571429	-9.933	0.157974	Prot_kinase_dom::Ser-Thr/Tyr_kinase_cat_dom::Tyr_kinase_cat_dom				Library	0.32	-0.279714	0.469417	0.224232	0.73	0.491027
ENSG00000103653	ENST00000439220	ENSP00000414764	CSK	CSK-002	PRINCIPAL:1	427	A	GCC	GGCACCTGGACGCCGCCATG	chr15	75094785	+	79	59	66	0.946785	14	182	113	69	FALSE	TRUE	7	4	0.571429	-6.62	0.163253	Prot_kinase_dom::Ser-Thr/Tyr_kinase_cat_dom::Tyr_kinase_cat_dom				Library	-0.57	-0.264546	0.0166175	0.228685	0.42	0.493507
ENSG00000103653	ENST00000439220	ENSP00000414764	CSK	CSK-002	PRINCIPAL:1	428	A	GCC	GGCACCTGGACGCCGCCATG	chr15	75094785	+	79	59	66	0.949002	14	182	113	69	FALSE	TRUE	7	4	0.571429	-6.62	0.173469	Prot_kinase_dom::Ser-Thr/Tyr_kinase_cat_dom::Tyr_kinase_cat_dom				Library	-0.57	-0.248626	0.0166175	0.233502	0.42	0.495977
ENSG00000103653	ENST00000439220	ENSP00000414764	CSK	CSK-002	PRINCIPAL:1	428	A	GCC	TAGGAAGGAGGGCCGCATGG	chr15	75094786	-	73	86	63	0.949002	14	182	114	68	FALSE	TRUE	7	4	0.571429	-6.62	0.173469	Prot_kinase_dom::Ser-Thr/Tyr_kinase_cat_dom::Tyr_kinase_cat_dom				Library	-0.98	-0.248626	-0.132052	0.233502	0.17	0.495977
ENSG00000103653	ENST00000439220	ENSP00000414764	CSK	CSK-002	PRINCIPAL:1	429	M	ATG	TAGGAAGGAGGGCCGCATGG	chr15	75094786	-	73	86	63	0.95122	14	182	114	68	FALSE	TRUE	7	4	0.571429	-6.01	0.208255	Prot_kinase_dom::Ser-Thr/Tyr_kinase_cat_dom::Tyr_kinase_cat_dom				Library	-0.98	-0.231957	-0.132052	0.238683	0.17	0.498436
ENSG00000103653	ENST00000439220	ENSP00000414764	CSK	CSK-002	PRINCIPAL:1	429	M	ATG	CTGTAGGAAGGAGGGCCGCA	chr15	75094789	-	63	53	67	0.95122	14	182	117	65	FALSE	TRUE	7	4	0.571429	-6.01	0.208255	Prot_kinase_dom::Ser-Thr/Tyr_kinase_cat_dom::Tyr_kinase_cat_dom				Library	-0.5	-0.231957	0.156423	0.238683	0.45	0.498436
ENSG00000103653	ENST00000439220	ENSP00000414764	CSK	CSK-002	PRINCIPAL:1	430	R	CGG	CTGTAGGAAGGAGGGCCGCA	chr15	75094789	-	63	53	67	0.953437	14	182	117	65	FALSE	TRUE	7	4	0.571429	-10.051	0.236022	Prot_kinase_dom::Ser-Thr/Tyr_kinase_cat_dom::Tyr_kinase_cat_dom				Library	-0.5	-0.214532	0.156423	0.244231	0.45	0.500884
ENSG00000103653	ENST00000439220	ENSP00000414764	CSK	CSK-002	PRINCIPAL:1	431	P	CCC	TCTCGGAGCTGTAGGAAGGA	chr15	75094797	-	45	86	58	0.955654	14	182	125	57	FALSE	TRUE	7	4	0.571429	-12.223	0.254853	Prot_kinase_dom::Ser-Thr/Tyr_kinase_cat_dom::Tyr_kinase_cat_dom				Library	-0.44	-0.196346	0.134341	0.25015	0.34	0.503325
ENSG00000103653	ENST00000439220	ENSP00000414764	CSK	CSK-002	PRINCIPAL:1	432	S	TCC	TCTCGGAGCTGTAGGAAGGA	chr15	75094797	-	45	86	58	0.957871	14	182	125	57	FALSE	TRUE	7	4	0.571429	-8.739	0.285875	Prot_kinase_dom::Ser-Thr/Tyr_kinase_cat_dom::Tyr_kinase_cat_dom				Library	-0.44	-0.177387	0.134341	0.256445	0.34	0.505761
ENSG00000103653	ENST00000439220	ENSP00000414764	CSK	CSK-002	PRINCIPAL:1	432	S	TCC	CTCTCGGAGCTGTAGGAAGG	chr15	75094798	-	44	46	59	0.957871	14	182	126	56	FALSE	TRUE	7	4	0.571429	-8.739	0.285875	Prot_kinase_dom::Ser-Thr/Tyr_kinase_cat_dom::Tyr_kinase_cat_dom				Library	-0.58	-0.177387	0.23647	0.256445	0.17	0.505761
ENSG00000103653	ENST00000439220	ENSP00000414764	CSK	CSK-002	PRINCIPAL:1	433	F	TTC	CTCTCGGAGCTGTAGGAAGG	chr15	75094798	-	44	46	59	0.960089	14	182	126	56	FALSE	TRUE	7	4	0.571429	-9.453	0.317528	Prot_kinase_dom::Ser-Thr/Tyr_kinase_cat_dom::Tyr_kinase_cat_dom				Library	-0.58	-0.157643	0.23647	0.263122	0.17	0.508195
ENSG00000103653	ENST00000439220	ENSP00000414764	CSK	CSK-002	PRINCIPAL:1	433	F	TTC	CTGCTCTCGGAGCTGTAGGA	chr15	75094801	-	66	78	69	0.960089	14	182	129	53	FALSE	TRUE	7	4	0.571429	-9.453	0.317528	Prot_kinase_dom::Ser-Thr/Tyr_kinase_cat_dom::Tyr_kinase_cat_dom				Library	-0.77	-0.157643	0.173479	0.263122	0.55	0.508195
ENSG00000103653	ENST00000439220	ENSP00000414764	CSK	CSK-002	PRINCIPAL:1	434	L	CTA	CTGCTCTCGGAGCTGTAGGA	chr15	75094801	-	66	78	69	0.962306	14	182	129	53	FALSE	TRUE	7	4	0.571429	-5.382	0.310205	Prot_kinase_dom::Ser-Thr/Tyr_kinase_cat_dom::Tyr_kinase_cat_dom				Library	-0.77	-0.137099	0.173479	0.270188	0.55	0.510634
ENSG00000103653	ENST00000439220	ENSP00000414764	CSK	CSK-002	PRINCIPAL:1	434	L	CTA	CAAGCTGCTCTCGGAGCTGT	chr15	75094805	-	70	56	54	0.962306	14	182	133	49	FALSE	TRUE	7	4	0.571429	-5.382	0.310205	Prot_kinase_dom::Ser-Thr/Tyr_kinase_cat_dom::Tyr_kinase_cat_dom				Library	-0.23	-0.137099	0.207035	0.270188	0.41	0.510634
ENSG00000103653	ENST00000439220	ENSP00000414764	CSK	CSK-002	PRINCIPAL:1	435	Q	CAG	CAAGCTGCTCTCGGAGCTGT	chr15	75094805	-	70	56	54	0.964523	14	182	133	49	FALSE	TRUE	7	4	0.571429	-7.33	0.331001	Prot_kinase_dom::Ser-Thr/Tyr_kinase_cat_dom::Tyr_kinase_cat_dom				Library	-0.23	-0.115737	0.207035	0.277649	0.41	0.513084
ENSG00000103653	ENST00000439220	ENSP00000414764	CSK	CSK-002	PRINCIPAL:1	436	L	CTC								0.966741	14	182			FALSE		7			-7.684	0.360708	Prot_kinase_dom::Ser-Thr/Tyr_kinase_cat_dom::Tyr_kinase_cat_dom				Library		-0.0935362		0.285515		0.51555
ENSG00000103653	ENST00000439220	ENSP00000414764	CSK	CSK-002	PRINCIPAL:1	437	R	CGA	TGATGTGCTCAAGCTGCTCT	chr15	75094814	-	55	38	41	0.968958	14	182	142	40	FALSE	TRUE	7	4	0.571429	-5.939	0.392049	Prot_kinase_dom::Ser-Thr/Tyr_kinase_cat_dom::Tyr_kinase_cat_dom				Library	0.31	-0.0704752	0.285201	0.293793	0.86	0.51804
ENSG00000103653	ENST00000439220	ENSP00000414764	CSK	CSK-002	PRINCIPAL:1	438	E	GAG	TGATGTGCTCAAGCTGCTCT	chr15	75094814	-	55	38	41	0.971175	14	182	142	40	FALSE	TRUE	7	4	0.571429	-6.237	0.400215	Prot_kinase_dom::Ser-Thr/Tyr_kinase_cat_dom::Tyr_kinase_cat_dom				Library	0.31	-0.0465324	0.285201	0.302493	0.86	0.520562
ENSG00000103653	ENST00000439220	ENSP00000414764	CSK	CSK-002	PRINCIPAL:1	439	Q	CAG								0.973392	14	182			FALSE		7			-5.774	0.442637	Prot_kinase_dom::Ser-Thr/Tyr_kinase_cat_dom::Tyr_kinase_cat_dom				Library		-0.0216866		0.311624		0.523121
ENSG00000103653	ENST00000439220	ENSP00000414764	CSK	CSK-002	PRINCIPAL:1	440	L	CTT								0.97561	14	182			FALSE		7			-6.818	0.480376	Prot_kinase_dom::Ser-Thr/Tyr_kinase_cat_dom::Tyr_kinase_cat_dom				Library		0.00408322		0.321194		0.525723
ENSG00000103653	ENST00000439220	ENSP00000414764	CSK	CSK-002	PRINCIPAL:1	441	E	GAG								0.977827	14	182			FALSE		7			-4.33	0.489886	Prot_kinase_dom::Ser-Thr/Tyr_kinase_cat_dom::Tyr_kinase_cat_dom				Library		0.0307978		0.331213		0.528374
ENSG00000103653	ENST00000439220	ENSP00000414764	CSK	CSK-002	PRINCIPAL:1	442	H	CAC								0.980044	14	182			FALSE		7			-4.01	0.534918	Prot_kinase_dom::Ser-Thr/Tyr_kinase_cat_dom::Tyr_kinase_cat_dom				Library		0.0584784		0.341692		0.53108
ENSG00000103653	ENST00000439220	ENSP00000414764	CSK	CSK-002	PRINCIPAL:1	443	I	ATC								0.982262	14	182			FALSE		7			-3.413	0.613018	Prot_kinase_dom::Ser-Thr/Tyr_kinase_cat_dom::Tyr_kinase_cat_dom				Library		0.0871461		0.352638		0.533846
ENSG00000103653	ENST00000439220	ENSP00000414764	CSK	CSK-002	PRINCIPAL:1	444	K	AAA								0.984479	14	182			FALSE		7			-2.699	0.683028	Prot_kinase_dom::Ser-Thr/Tyr_kinase_cat_dom::Tyr_kinase_cat_dom				Library		0.116822		0.364063		0.536678
ENSG00000103653	ENST00000439220	ENSP00000414764	CSK	CSK-002	PRINCIPAL:1	445	T	ACC								0.986696	14	182			FALSE		7			-1.304	0.741403	Prot_kinase_dom::Ser-Thr/Tyr_kinase_cat_dom::Tyr_kinase_cat_dom				Library		0.147528		0.375975		0.539582
ENSG00000103653	ENST00000439220	ENSP00000414764	CSK	CSK-002	PRINCIPAL:1	446	H	CAC	CCGTCACAGGTGCAGCTCGT	chr15	75094840	-	88	66	48	0.988914	14	182	168	14	FALSE	TRUE	7	4	0.571429	-1.468	0.812695	Prot_kinase_dom::Ser-Thr/Tyr_kinase_cat_dom::Tyr_kinase_cat_dom				Library	0.39	0.179285	0.152859	0.388385	0.48	0.542563
ENSG00000103653	ENST00000439220	ENSP00000414764	CSK	CSK-002	PRINCIPAL:1	446	H	CAC	GCCGTCACAGGTGCAGCTCG	chr15	75094841	-	81	43	46	0.988914	14	182	169	13	FALSE	TRUE	7	4	0.571429	-1.468	0.812695	Prot_kinase_dom::Ser-Thr/Tyr_kinase_cat_dom::Tyr_kinase_cat_dom				Library		0.179285		0.388385		0.542563
ENSG00000103653	ENST00000439220	ENSP00000414764	CSK	CSK-002	PRINCIPAL:1	447	E	GAG	CCGTCACAGGTGCAGCTCGT	chr15	75094840	-	88	66	48	0.991131	14	182	168	14	FALSE	TRUE	7	4	0.571429	-2.307	0.81161	Prot_kinase_dom::Ser-Thr/Tyr_kinase_cat_dom::Tyr_kinase_cat_dom				Library	0.39	0.212115	0.152859	0.401303	0.48	0.545628
ENSG00000103653	ENST00000439220	ENSP00000414764	CSK	CSK-002	PRINCIPAL:1	447	E	GAG	GCCGTCACAGGTGCAGCTCG	chr15	75094841	-	81	43	46	0.991131	14	182	169	13	FALSE	TRUE	7	4	0.571429	-2.307	0.81161	Prot_kinase_dom::Ser-Thr/Tyr_kinase_cat_dom::Tyr_kinase_cat_dom				Library		0.212115		0.401303		0.545628
ENSG00000103653	ENST00000439220	ENSP00000414764	CSK	CSK-002	PRINCIPAL:1	448	L	CTG								0.993348	14	182			FALSE		7			-2.653	0.859238	Prot_kinase_dom::Ser-Thr/Tyr_kinase_cat_dom::Tyr_kinase_cat_dom				Library		0.246036		0.414739		0.548781
ENSG00000103653	ENST00000439220	ENSP00000414764	CSK	CSK-002	PRINCIPAL:1	449	H	CAC	CCCACGAGCTGCACCTGTGA	chr15	75094851	+	66	81	60	0.995565	14	182	179	3	FALSE	TRUE	7	4	0.571429	-1.857	0.830259	Prot_kinase_dom::Ser-Thr/Tyr_kinase_cat_dom::Tyr_kinase_cat_dom				Library	0.61	0.28107	0.754814	0.428706	0.56	0.55203
ENSG00000103653	ENST00000439220	ENSP00000414764	CSK	CSK-002	PRINCIPAL:1	450	L	CTG	CCCACGAGCTGCACCTGTGA	chr15	75094851	+	66	81	60	0.997783	14	182	179	3	FALSE	TRUE	7	4	0.571429	-0.294	0.859603					Library	0.61	0.317234	0.754814	0.443215	0.56	0.555381
ENSG00000103653	ENST00000439220	ENSP00000414764	CSK	CSK-002	PRINCIPAL:1	450	L	CTG	AGGCGGAGGCCAGCCGTCAC	chr15	75094853	-	85	50	70	0.997783	14	182	181	1	FALSE	TRUE	7	4	0.571429	-0.294	0.859603					Library	0.58	0.317234	0.668514	0.443215	0.75	0.555381
ENSG00000103653	ENST00000439220	ENSP00000414764	CSK	CSK-002	PRINCIPAL:1	451	*	TGA	AGGCGGAGGCCAGCCGTCAC	chr15	75094853	-	85	50	70	1	14	182	181	1	FALSE	TRUE	7	4	0.571429							Library	0.58	0.354546	0.668514	0.458278	0.75	0.558839
ENSG00000141367	ENST00000269122	ENSP00000269122	CLTC	CLTC-001	PRINCIPAL:1	1	M	ATG	AATTGGCAGAATCTGGGCCA	chr17	57697496	-	42	81	65	0.000596659	1	41	3	38	FALSE	FALSE	6	4	0.666667	-2.163	0.650571		C	1C9I	gi|7245840|pdb|1C9I|A Chain A, Peptide-In-Groove Interactions Link Target Proteins To The B-Propeller Of Clathrin >gi|7245841|pdb|1C9I|B Chain B, Peptide-In-Groove Interactions Link Target Proteins To The B-Propeller Of Clathrin	Library
ENSG00000141367	ENST00000269122	ENSP00000269122	CLTC	CLTC-001	PRINCIPAL:1	2	A	GCC	AATTGGCAGAATCTGGGCCA	chr17	57697496	-	42	81	65	0.00119332	1	41	3	38	FALSE	FALSE	6	4	0.666667	-4.124	0.600482		C	1C9I	gi|7245840|pdb|1C9I|A Chain A, Peptide-In-Groove Interactions Link Target Proteins To The B-Propeller Of Clathrin >gi|7245841|pdb|1C9I|B Chain B, Peptide-In-Groove Interactions Link Target Proteins To The B-Propeller Of Clathrin	Library
ENSG00000141367	ENST00000269122	ENSP00000269122	CLTC	CLTC-001	PRINCIPAL:1	3	Q	CAG	AAAACGAATTGGCAGAATCT	chr17	57697502	-	56	59	74	0.00178998	1	41	9	32	FALSE	FALSE	6	4	0.666667	-5.254	0.560385		C	1C9L	gi|7245844|pdb|1C9L|A Chain A, Peptide-In-Groove Interactions Link Target Proteins To The B-Propeller Of Clathrin >gi|7245845|pdb|1C9L|B Chain B, Peptide-In-Groove Interactions Link Target Proteins To The B-Propeller Of Clathrin	Library	-1.18	-0.943962	-1.17847	-1.02853	-1.37	-0.997278
ENSG00000141367	ENST00000269122	ENSP00000269122	CLTC	CLTC-001	PRINCIPAL:1	3	Q	CAG	GAAAACGAATTGGCAGAATC	chr17	57697503	-	68	11	71	0.00178998	1	41	10	31	FALSE	FALSE	6	4	0.666667	-5.254	0.560385		C	1C9L	gi|7245844|pdb|1C9L|A Chain A, Peptide-In-Groove Interactions Link Target Proteins To The B-Propeller Of Clathrin >gi|7245845|pdb|1C9L|B Chain B, Peptide-In-Groove Interactions Link Target Proteins To The B-Propeller Of Clathrin	Library	0.03	-0.943962	0.412949	-1.02853	0.43	-0.997278
ENSG00000141367	ENST00000269122	ENSP00000269122	CLTC	CLTC-001	PRINCIPAL:1	4	I	ATT	AAAACGAATTGGCAGAATCT	chr17	57697502	-	56	59	74	0.00238663	1	41	9	32	FALSE	FALSE	6	4	0.666667	-4.919	0.462621		C	1C9L	gi|7245844|pdb|1C9L|A Chain A, Peptide-In-Groove Interactions Link Target Proteins To The B-Propeller Of Clathrin >gi|7245845|pdb|1C9L|B Chain B, Peptide-In-Groove Interactions Link Target Proteins To The B-Propeller Of Clathrin	Library	-1.18	-0.940816	-1.17847	-1.02278	-1.37	-0.994838
ENSG00000141367	ENST00000269122	ENSP00000269122	CLTC	CLTC-001	PRINCIPAL:1	4	I	ATT	GAAAACGAATTGGCAGAATC	chr17	57697503	-	68	11	71	0.00238663	1	41	10	31	FALSE	FALSE	6	4	0.666667	-4.919	0.462621		C	1C9L	gi|7245844|pdb|1C9L|A Chain A, Peptide-In-Groove Interactions Link Target Proteins To The B-Propeller Of Clathrin >gi|7245845|pdb|1C9L|B Chain B, Peptide-In-Groove Interactions Link Target Proteins To The B-Propeller Of Clathrin	Library	0.03	-0.940816	0.412949	-1.02278	0.43	-0.994838
ENSG00000141367	ENST00000269122	ENSP00000269122	CLTC	CLTC-001	PRINCIPAL:1	5	L	CTG								0.00298329	1	41			FALSE		6			-5.433	0.403239		C	1C9L	gi|7245844|pdb|1C9L|A Chain A, Peptide-In-Groove Interactions Link Target Proteins To The B-Propeller Of Clathrin >gi|7245845|pdb|1C9L|B Chain B, Peptide-In-Groove Interactions Link Target Proteins To The B-Propeller Of Clathrin	Library		-0.937537		-1.01677		-0.992244
ENSG00000141367	ENST00000269122	ENSP00000269122	CLTC	CLTC-001	PRINCIPAL:1	6	P	CCA	AGATGCTCCTGAAAACGAAT	chr17	57697513	-	73	35	55	0.00357995	1	41	20	21	FALSE	FALSE	6	4	0.666667	-8.848	0.320507		C	1C9L	gi|7245844|pdb|1C9L|A Chain A, Peptide-In-Groove Interactions Link Target Proteins To The B-Propeller Of Clathrin >gi|7245845|pdb|1C9L|B Chain B, Peptide-In-Groove Interactions Link Target Proteins To The B-Propeller Of Clathrin	Library	-1.04	-0.934136	-1.91137	-1.01051	-1.82	-0.989506
ENSG00000141367	ENST00000269122	ENSP00000269122	CLTC	CLTC-001	PRINCIPAL:1	7	I	ATT	AGATGCTCCTGAAAACGAAT	chr17	57697513	-	73	35	55	0.00417661	1	41	20	21	FALSE	FALSE	6	4	0.666667	-7.785	0.265716		E	1C9L	gi|7245844|pdb|1C9L|A Chain A, Peptide-In-Groove Interactions Link Target Proteins To The B-Propeller Of Clathrin >gi|7245845|pdb|1C9L|B Chain B, Peptide-In-Groove Interactions Link Target Proteins To The B-Propeller Of Clathrin	Library	-1.04	-0.930626	-1.91137	-1.004	-1.82	-0.986634
ENSG00000141367	ENST00000269122	ENSP00000269122	CLTC	CLTC-001	PRINCIPAL:1	8	R	CGT	GATTCTGCCAATTCGTTTTC	chr17	57697517	+	86	1	53	0.00477327	1	41	24	17	FALSE	FALSE	6	4	0.666667	-7.751	0.225397		E	1C9L	gi|7245844|pdb|1C9L|A Chain A, Peptide-In-Groove Interactions Link Target Proteins To The B-Propeller Of Clathrin >gi|7245845|pdb|1C9L|B Chain B, Peptide-In-Groove Interactions Link Target Proteins To The B-Propeller Of Clathrin	Library		-0.927015		-0.99727		-0.983638
ENSG00000141367	ENST00000269122	ENSP00000269122	CLTC	CLTC-001	PRINCIPAL:1	9	F	TTT	GATTCTGCCAATTCGTTTTC	chr17	57697517	+	86	1	53	0.00536993	1	41	24	17	FALSE	FALSE	6	4	0.666667	-8.821	0.201297		E	1C9L	gi|7245844|pdb|1C9L|A Chain A, Peptide-In-Groove Interactions Link Target Proteins To The B-Propeller Of Clathrin >gi|7245845|pdb|1C9L|B Chain B, Peptide-In-Groove Interactions Link Target Proteins To The B-Propeller Of Clathrin	Library		-0.923316		-0.990325		-0.980523
ENSG00000141367	ENST00000269122	ENSP00000269122	CLTC	CLTC-001	PRINCIPAL:1	10	Q	CAG								0.00596659	1	41			FALSE		6			-7.892	0.197453		H	1C9L	gi|7245844|pdb|1C9L|A Chain A, Peptide-In-Groove Interactions Link Target Proteins To The B-Propeller Of Clathrin >gi|7245845|pdb|1C9L|B Chain B, Peptide-In-Groove Interactions Link Target Proteins To The B-Propeller Of Clathrin	Library		-0.919538		-0.983178		-0.977297
ENSG00000141367	ENST00000269122	ENSP00000269122	CLTC	CLTC-001	PRINCIPAL:1	11	E	GAG								0.00656325	1	41			FALSE		6			-8.379	0.209026		H	1C9L	gi|7245844|pdb|1C9L|A Chain A, Peptide-In-Groove Interactions Link Target Proteins To The B-Propeller Of Clathrin >gi|7245845|pdb|1C9L|B Chain B, Peptide-In-Groove Interactions Link Target Proteins To The B-Propeller Of Clathrin	Library		-0.915693		-0.975841		-0.973966
ENSG00000141367	ENST00000269122	ENSP00000269122	CLTC	CLTC-001	PRINCIPAL:1	12	H	CAT	TCGTTTTCAGGAGCATCTCC	chr17	57697529	+	67	50	52	0.0071599	1	41	36	5	FALSE	FALSE	6	4	0.666667	-9.917	0.215025		H	1C9L	gi|7245844|pdb|1C9L|A Chain A, Peptide-In-Groove Interactions Link Target Proteins To The B-Propeller Of Clathrin >gi|7245845|pdb|1C9L|B Chain B, Peptide-In-Groove Interactions Link Target Proteins To The B-Propeller Of Clathrin	Library		-0.911791		-0.968325		-0.970535
ENSG00000141367	ENST00000269122	ENSP00000269122	CLTC	CLTC-001	PRINCIPAL:1	13	L	CTC	TCGTTTTCAGGAGCATCTCC	chr17	57697529	+	67	50	52	0.00775656	1	41	36	5	FALSE	FALSE	6	4	0.666667	-7.102	0.224088		H	1C9L	gi|7245844|pdb|1C9L|A Chain A, Peptide-In-Groove Interactions Link Target Proteins To The B-Propeller Of Clathrin >gi|7245845|pdb|1C9L|B Chain B, Peptide-In-Groove Interactions Link Target Proteins To The B-Propeller Of Clathrin	Library		-0.907841		-0.960642		-0.967012
ENSG00000141367	ENST00000269122	ENSP00000269122	CLTC	CLTC-001	PRINCIPAL:1	13	L	CTC	TTCAGGAGCATCTCCAGGTG	chr17	57697534	+	45	78	69	0.00775656	1	41	41	0	FALSE	FALSE	6	4	0.666667	-7.102	0.224088		H	1C9L	gi|7245844|pdb|1C9L|A Chain A, Peptide-In-Groove Interactions Link Target Proteins To The B-Propeller Of Clathrin >gi|7245845|pdb|1C9L|B Chain B, Peptide-In-Groove Interactions Link Target Proteins To The B-Propeller Of Clathrin	Library	-1.68	-0.907841	-1.44516	-0.960642	-1.47	-0.967012
ENSG00000141367	ENST00000269122	ENSP00000269122	CLTC	CLTC-001	PRINCIPAL:1	14	Q	CAG	TTCAGGAGCATCTCCAGGTG	chr17	57697534	+	45	78	69	0.00835322	1	41	41	0	FALSE	FALSE	6	4	0.666667	-8.158	0.238322		H	1C9L	gi|7245844|pdb|1C9L|A Chain A, Peptide-In-Groove Interactions Link Target Proteins To The B-Propeller Of Clathrin >gi|7245845|pdb|1C9L|B Chain B, Peptide-In-Groove Interactions Link Target Proteins To The B-Propeller Of Clathrin	Library	-1.68	-0.903855	-1.44516	-0.952803	-1.47	-0.963403
ENSG00000141367	ENST00000269122	ENSP00000269122	CLTC	CLTC-001	PRINCIPAL:1	15	L	CTC								0.00894988	2	207			TRUE		6			-8.668	0.268213		H	1C9L	gi|7245844|pdb|1C9L|A Chain A, Peptide-In-Groove Interactions Link Target Proteins To The B-Propeller Of Clathrin >gi|7245845|pdb|1C9L|B Chain B, Peptide-In-Groove Interactions Link Target Proteins To The B-Propeller Of Clathrin	Library		-0.89984		-0.944819		-0.959711
ENSG00000141367	ENST00000269122	ENSP00000269122	CLTC	CLTC-001	PRINCIPAL:1	16	Q	CAG	TTTTTTCTAGCTCCAGAACC	chr17	57721643	+	52	30	62	0.00954654	2	207	6	201	TRUE	FALSE	6	4	0.666667	-8.498	0.282168		C	1C9L	gi|7245844|pdb|1C9L|A Chain A, Peptide-In-Groove Interactions Link Target Proteins To The B-Propeller Of Clathrin >gi|7245845|pdb|1C9L|B Chain B, Peptide-In-Groove Interactions Link Target Proteins To The B-Propeller Of Clathrin	Library		-0.895806		-0.9367		-0.955941
ENSG00000141367	ENST00000269122	ENSP00000269122	CLTC	CLTC-001	PRINCIPAL:1	16	Q	CAG	TTTTTCTAGCTCCAGAACCT	chr17	57721644	+	24	78	64	0.00954654	2	207	7	200	TRUE	FALSE	6	4	0.666667	-8.498	0.282168		C	1C9L	gi|7245844|pdb|1C9L|A Chain A, Peptide-In-Groove Interactions Link Target Proteins To The B-Propeller Of Clathrin >gi|7245845|pdb|1C9L|B Chain B, Peptide-In-Groove Interactions Link Target Proteins To The B-Propeller Of Clathrin	Library		-0.895806		-0.9367		-0.955941
ENSG00000141367	ENST00000269122	ENSP00000269122	CLTC	CLTC-001	PRINCIPAL:1	16	Q	CAG	CTGGGTTGATACCCAGGTTC	chr17	57721644	-	60	5	58	0.00954654	2	207	7	200	TRUE	FALSE	6	4	0.666667	-8.498	0.282168		C	1C9L	gi|7245844|pdb|1C9L|A Chain A, Peptide-In-Groove Interactions Link Target Proteins To The B-Propeller Of Clathrin >gi|7245845|pdb|1C9L|B Chain B, Peptide-In-Groove Interactions Link Target Proteins To The B-Propeller Of Clathrin	Library		-0.895806		-0.9367		-0.955941
ENSG00000141367	ENST00000269122	ENSP00000269122	CLTC	CLTC-001	PRINCIPAL:1	17	N	AAC	CTGGGTTGATACCCAGGTTC	chr17	57721644	-	60	5	58	0.0101432	2	207	7	200	TRUE	FALSE	6	4	0.666667	-10.27	0.293855		C	1C9L	gi|7245844|pdb|1C9L|A Chain A, Peptide-In-Groove Interactions Link Target Proteins To The B-Propeller Of Clathrin >gi|7245845|pdb|1C9L|B Chain B, Peptide-In-Groove Interactions Link Target Proteins To The B-Propeller Of Clathrin	Library		-0.891758		-0.928457		-0.952097
ENSG00000141367	ENST00000269122	ENSP00000269122	CLTC	CLTC-001	PRINCIPAL:1	17	N	AAC	TTTTTCTAGCTCCAGAACCT	chr17	57721644	+	24	78	64	0.0101432	2	207	7	200	TRUE	FALSE	6	4	0.666667	-10.27	0.293855		C	1C9L	gi|7245844|pdb|1C9L|A Chain A, Peptide-In-Groove Interactions Link Target Proteins To The B-Propeller Of Clathrin >gi|7245845|pdb|1C9L|B Chain B, Peptide-In-Groove Interactions Link Target Proteins To The B-Propeller Of Clathrin	Library		-0.891758		-0.928457		-0.952097
ENSG00000141367	ENST00000269122	ENSP00000269122	CLTC	CLTC-001	PRINCIPAL:1	17	N	AAC	TTTTTTCTAGCTCCAGAACC	chr17	57721643	+	52	30	62	0.0101432	2	207	6	201	TRUE	FALSE	6	4	0.666667	-10.27	0.293855		C	1C9L	gi|7245844|pdb|1C9L|A Chain A, Peptide-In-Groove Interactions Link Target Proteins To The B-Propeller Of Clathrin >gi|7245845|pdb|1C9L|B Chain B, Peptide-In-Groove Interactions Link Target Proteins To The B-Propeller Of Clathrin	Library		-0.891758		-0.928457		-0.952097
ENSG00000141367	ENST00000269122	ENSP00000269122	CLTC	CLTC-001	PRINCIPAL:1	18	L	CTG	TGTTTGCTGGGTTGATACCC	chr17	57721650	-	75	46	64	0.0107399	2	207	13	194	TRUE	FALSE	6	4	0.666667	-9.252	0.276964		C	1C9L	gi|7245844|pdb|1C9L|A Chain A, Peptide-In-Groove Interactions Link Target Proteins To The B-Propeller Of Clathrin >gi|7245845|pdb|1C9L|B Chain B, Peptide-In-Groove Interactions Link Target Proteins To The B-Propeller Of Clathrin	Library		-0.887705		-0.920099		-0.948183
ENSG00000141367	ENST00000269122	ENSP00000269122	CLTC	CLTC-001	PRINCIPAL:1	19	G	GGT	TGTTTGCTGGGTTGATACCC	chr17	57721650	-	75	46	64	0.0113365	2	207	13	194	TRUE	FALSE	6	4	0.666667	-11.311	0.277172		C	1C9L	gi|7245844|pdb|1C9L|A Chain A, Peptide-In-Groove Interactions Link Target Proteins To The B-Propeller Of Clathrin >gi|7245845|pdb|1C9L|B Chain B, Peptide-In-Groove Interactions Link Target Proteins To The B-Propeller Of Clathrin	Library		-0.883654		-0.911636		-0.944203
ENSG00000141367	ENST00000269122	ENSP00000269122	CLTC	CLTC-001	PRINCIPAL:1	20	I	ATC								0.0119332	2	207			TRUE		6			-9.87	0.258313		C	1C9L	gi|7245844|pdb|1C9L|A Chain A, Peptide-In-Groove Interactions Link Target Proteins To The B-Propeller Of Clathrin >gi|7245845|pdb|1C9L|B Chain B, Peptide-In-Groove Interactions Link Target Proteins To The B-Propeller Of Clathrin	Library		-0.879611		-0.903079		-0.940159
ENSG00000141367	ENST00000269122	ENSP00000269122	CLTC	CLTC-001	PRINCIPAL:1	21	N	AAC								0.0125298	2	207			TRUE		6			-10.107	0.254162		C	1C9L	gi|7245844|pdb|1C9L|A Chain A, Peptide-In-Groove Interactions Link Target Proteins To The B-Propeller Of Clathrin >gi|7245845|pdb|1C9L|B Chain B, Peptide-In-Groove Interactions Link Target Proteins To The B-Propeller Of Clathrin	Library		-0.875585		-0.894437		-0.936055
ENSG00000141367	ENST00000269122	ENSP00000269122	CLTC	CLTC-001	PRINCIPAL:1	22	P	CCA	TACTGAAGCCAATGTTTGCT	chr17	57721662	-	62	53	56	0.0131265	2	207	25	182	TRUE	FALSE	6	4	0.666667	-9.498	0.246586		C	1C9L	gi|7245844|pdb|1C9L|A Chain A, Peptide-In-Groove Interactions Link Target Proteins To The B-Propeller Of Clathrin >gi|7245845|pdb|1C9L|B Chain B, Peptide-In-Groove Interactions Link Target Proteins To The B-Propeller Of Clathrin	Library		-0.871581		-0.885721		-0.931893
ENSG00000141367	ENST00000269122	ENSP00000269122	CLTC	CLTC-001	PRINCIPAL:1	22	P	CCA	GTACTGAAGCCAATGTTTGC	chr17	57721663	-	72	21	54	0.0131265	2	207	26	181	TRUE	FALSE	6	4	0.666667	-9.498	0.246586		C	1C9L	gi|7245844|pdb|1C9L|A Chain A, Peptide-In-Groove Interactions Link Target Proteins To The B-Propeller Of Clathrin >gi|7245845|pdb|1C9L|B Chain B, Peptide-In-Groove Interactions Link Target Proteins To The B-Propeller Of Clathrin	Library	-0.71	-0.871581	-0.180094	-0.885721	-0.14	-0.931893
ENSG00000141367	ENST00000269122	ENSP00000269122	CLTC	CLTC-001	PRINCIPAL:1	23	A	GCA	GGTATCAACCCAGCAAACAT	chr17	57721665	+	73	75	66	0.0137232	2	207	28	179	TRUE	FALSE	6	4	0.666667	-9.134	0.248867		C	1C9L	gi|7245844|pdb|1C9L|A Chain A, Peptide-In-Groove Interactions Link Target Proteins To The B-Propeller Of Clathrin >gi|7245845|pdb|1C9L|B Chain B, Peptide-In-Groove Interactions Link Target Proteins To The B-Propeller Of Clathrin	Library	-1.16	-0.867607	-1.34149	-0.87694	-1.45	-0.927677
ENSG00000141367	ENST00000269122	ENSP00000269122	CLTC	CLTC-001	PRINCIPAL:1	23	A	GCA	TACTGAAGCCAATGTTTGCT	chr17	57721662	-	62	53	56	0.0137232	2	207	25	182	TRUE	FALSE	6	4	0.666667	-9.134	0.248867		C	1C9L	gi|7245844|pdb|1C9L|A Chain A, Peptide-In-Groove Interactions Link Target Proteins To The B-Propeller Of Clathrin >gi|7245845|pdb|1C9L|B Chain B, Peptide-In-Groove Interactions Link Target Proteins To The B-Propeller Of Clathrin	Library		-0.867607		-0.87694		-0.927677
ENSG00000141367	ENST00000269122	ENSP00000269122	CLTC	CLTC-001	PRINCIPAL:1	23	A	GCA	GTACTGAAGCCAATGTTTGC	chr17	57721663	-	72	21	54	0.0137232	2	207	26	181	TRUE	FALSE	6	4	0.666667	-9.134	0.248867		C	1C9L	gi|7245844|pdb|1C9L|A Chain A, Peptide-In-Groove Interactions Link Target Proteins To The B-Propeller Of Clathrin >gi|7245845|pdb|1C9L|B Chain B, Peptide-In-Groove Interactions Link Target Proteins To The B-Propeller Of Clathrin	Library	-0.71	-0.867607	-0.180094	-0.87694	-0.14	-0.927677
ENSG00000141367	ENST00000269122	ENSP00000269122	CLTC	CLTC-001	PRINCIPAL:1	24	N	AAC	GGTATCAACCCAGCAAACAT	chr17	57721665	+	73	75	66	0.0143198	2	207	28	179	TRUE	FALSE	6	4	0.666667	-10.292	0.238748		C	1C9L	gi|7245844|pdb|1C9L|A Chain A, Peptide-In-Groove Interactions Link Target Proteins To The B-Propeller Of Clathrin >gi|7245845|pdb|1C9L|B Chain B, Peptide-In-Groove Interactions Link Target Proteins To The B-Propeller Of Clathrin	Library	-1.16	-0.863669	-1.34149	-0.868106	-1.45	-0.923411
ENSG00000141367	ENST00000269122	ENSP00000269122	CLTC	CLTC-001	PRINCIPAL:1	25	I	ATT								0.0149165	2	207			TRUE		6			-9.835	0.233153		C	1C9L	gi|7245844|pdb|1C9L|A Chain A, Peptide-In-Groove Interactions Link Target Proteins To The B-Propeller Of Clathrin >gi|7245845|pdb|1C9L|B Chain B, Peptide-In-Groove Interactions Link Target Proteins To The B-Propeller Of Clathrin	Library		-0.859775		-0.85923		-0.919099
ENSG00000141367	ENST00000269122	ENSP00000269122	CLTC	CLTC-001	PRINCIPAL:1	26	G	GGC								0.0155131	2	207			TRUE		6			-10.398	0.245865		C	1C9L	gi|7245844|pdb|1C9L|A Chain A, Peptide-In-Groove Interactions Link Target Proteins To The B-Propeller Of Clathrin >gi|7245845|pdb|1C9L|B Chain B, Peptide-In-Groove Interactions Link Target Proteins To The B-Propeller Of Clathrin	Library		-0.855929		-0.850324		-0.914744
ENSG00000141367	ENST00000269122	ENSP00000269122	CLTC	CLTC-001	PRINCIPAL:1	27	F	TTC								0.0161098	2	207			TRUE		6			-11.279	0.256914		C	1C9L	gi|7245844|pdb|1C9L|A Chain A, Peptide-In-Groove Interactions Link Target Proteins To The B-Propeller Of Clathrin >gi|7245845|pdb|1C9L|B Chain B, Peptide-In-Groove Interactions Link Target Proteins To The B-Propeller Of Clathrin	Library		-0.852139		-0.841398		-0.91035
ENSG00000141367	ENST00000269122	ENSP00000269122	CLTC	CLTC-001	PRINCIPAL:1	28	S	AGT								0.0167064	2	207			TRUE		6			-8.749	0.264343		C	1C9L	gi|7245844|pdb|1C9L|A Chain A, Peptide-In-Groove Interactions Link Target Proteins To The B-Propeller Of Clathrin >gi|7245845|pdb|1C9L|B Chain B, Peptide-In-Groove Interactions Link Target Proteins To The B-Propeller Of Clathrin	Library		-0.84841		-0.832464		-0.905919
ENSG00000141367	ENST00000269122	ENSP00000269122	CLTC	CLTC-001	PRINCIPAL:1	29	T	ACC								0.0173031	2	207			TRUE		6			-9.602	0.267269		E	1C9L	gi|7245844|pdb|1C9L|A Chain A, Peptide-In-Groove Interactions Link Target Proteins To The B-Propeller Of Clathrin >gi|7245845|pdb|1C9L|B Chain B, Peptide-In-Groove Interactions Link Target Proteins To The B-Propeller Of Clathrin	Library		-0.844746		-0.823533		-0.901455
ENSG00000141367	ENST00000269122	ENSP00000269122	CLTC	CLTC-001	PRINCIPAL:1	30	L	CTG	TTTGTCAGACTCCATAGTCA	chr17	57721685	-	63	92	56	0.0178998	2	207	48	159	TRUE	FALSE	6	4	0.666667	-9.688	0.261015		E	1C9L	gi|7245844|pdb|1C9L|A Chain A, Peptide-In-Groove Interactions Link Target Proteins To The B-Propeller Of Clathrin >gi|7245845|pdb|1C9L|B Chain B, Peptide-In-Groove Interactions Link Target Proteins To The B-Propeller Of Clathrin	Library		-0.841155		-0.814615		-0.89696
ENSG00000141367	ENST00000269122	ENSP00000269122	CLTC	CLTC-001	PRINCIPAL:1	30	L	CTG	TGGCTTCAGTACCCTGACTA	chr17	57721685	+	74	23	62	0.0178998	2	207	48	159	TRUE	FALSE	6	4	0.666667	-9.688	0.261015		E	1C9L	gi|7245844|pdb|1C9L|A Chain A, Peptide-In-Groove Interactions Link Target Proteins To The B-Propeller Of Clathrin >gi|7245845|pdb|1C9L|B Chain B, Peptide-In-Groove Interactions Link Target Proteins To The B-Propeller Of Clathrin	Library		-0.841155		-0.814615		-0.89696
ENSG00000141367	ENST00000269122	ENSP00000269122	CLTC	CLTC-001	PRINCIPAL:1	30	L	CTG	ATTTGTCAGACTCCATAGTC	chr17	57721686	-	64	35	61	0.0178998	2	207	49	158	TRUE	FALSE	6	4	0.666667	-9.688	0.261015		E	1C9L	gi|7245844|pdb|1C9L|A Chain A, Peptide-In-Groove Interactions Link Target Proteins To The B-Propeller Of Clathrin >gi|7245845|pdb|1C9L|B Chain B, Peptide-In-Groove Interactions Link Target Proteins To The B-Propeller Of Clathrin	Library	-0.73	-0.841155	-1.35238	-0.814615	-0.98	-0.89696
ENSG00000141367	ENST00000269122	ENSP00000269122	CLTC	CLTC-001	PRINCIPAL:1	31	T	ACT	TGGCTTCAGTACCCTGACTA	chr17	57721685	+	74	23	62	0.0184964	2	207	48	159	TRUE	FALSE	6	4	0.666667	-10.652	0.248197		E	1C9L	gi|7245844|pdb|1C9L|A Chain A, Peptide-In-Groove Interactions Link Target Proteins To The B-Propeller Of Clathrin >gi|7245845|pdb|1C9L|B Chain B, Peptide-In-Groove Interactions Link Target Proteins To The B-Propeller Of Clathrin	Library		-0.83764		-0.805722		-0.892437
ENSG00000141367	ENST00000269122	ENSP00000269122	CLTC	CLTC-001	PRINCIPAL:1	31	T	ACT	TTTGTCAGACTCCATAGTCA	chr17	57721685	-	63	92	56	0.0184964	2	207	48	159	TRUE	FALSE	6	4	0.666667	-10.652	0.248197		E	1C9L	gi|7245844|pdb|1C9L|A Chain A, Peptide-In-Groove Interactions Link Target Proteins To The B-Propeller Of Clathrin >gi|7245845|pdb|1C9L|B Chain B, Peptide-In-Groove Interactions Link Target Proteins To The B-Propeller Of Clathrin	Library		-0.83764		-0.805722		-0.892437
ENSG00000141367	ENST00000269122	ENSP00000269122	CLTC	CLTC-001	PRINCIPAL:1	31	T	ACT	ATTTGTCAGACTCCATAGTC	chr17	57721686	-	64	35	61	0.0184964	2	207	49	158	TRUE	FALSE	6	4	0.666667	-10.652	0.248197		E	1C9L	gi|7245844|pdb|1C9L|A Chain A, Peptide-In-Groove Interactions Link Target Proteins To The B-Propeller Of Clathrin >gi|7245845|pdb|1C9L|B Chain B, Peptide-In-Groove Interactions Link Target Proteins To The B-Propeller Of Clathrin	Library	-0.73	-0.83764	-1.35238	-0.805722	-0.98	-0.892437
ENSG00000141367	ENST00000269122	ENSP00000269122	CLTC	CLTC-001	PRINCIPAL:1	32	M	ATG								0.0190931	2	207			TRUE		6			-11.14	0.246695		E	1C9L	gi|7245844|pdb|1C9L|A Chain A, Peptide-In-Groove Interactions Link Target Proteins To The B-Propeller Of Clathrin >gi|7245845|pdb|1C9L|B Chain B, Peptide-In-Groove Interactions Link Target Proteins To The B-Propeller Of Clathrin	Library		-0.834207		-0.796864		-0.887889
ENSG00000141367	ENST00000269122	ENSP00000269122	CLTC	CLTC-001	PRINCIPAL:1	33	E	GAG								0.0196897	2	207			TRUE		6			-11.709	0.261295		C	1C9L	gi|7245844|pdb|1C9L|A Chain A, Peptide-In-Groove Interactions Link Target Proteins To The B-Propeller Of Clathrin >gi|7245845|pdb|1C9L|B Chain B, Peptide-In-Groove Interactions Link Target Proteins To The B-Propeller Of Clathrin	Library		-0.830861		-0.78805		-0.883317
ENSG00000141367	ENST00000269122	ENSP00000269122	CLTC	CLTC-001	PRINCIPAL:1	34	S	TCT								0.0202864	2	207			TRUE		6			-11.08	0.263894		C	1C9L	gi|7245844|pdb|1C9L|A Chain A, Peptide-In-Groove Interactions Link Target Proteins To The B-Propeller Of Clathrin >gi|7245845|pdb|1C9L|B Chain B, Peptide-In-Groove Interactions Link Target Proteins To The B-Propeller Of Clathrin	Library		-0.827608		-0.779288		-0.878724
ENSG00000141367	ENST00000269122	ENSP00000269122	CLTC	CLTC-001	PRINCIPAL:1	35	D	GAC								0.0208831	2	207			TRUE		6			-12.529	0.243854		C	1C9L	gi|7245844|pdb|1C9L|A Chain A, Peptide-In-Groove Interactions Link Target Proteins To The B-Propeller Of Clathrin >gi|7245845|pdb|1C9L|B Chain B, Peptide-In-Groove Interactions Link Target Proteins To The B-Propeller Of Clathrin	Library		-0.824453		-0.770585		-0.87411
ENSG00000141367	ENST00000269122	ENSP00000269122	CLTC	CLTC-001	PRINCIPAL:1	36	K	AAA								0.0214797	2	207			TRUE		6			-11.587	0.228175		C	1C9L	gi|7245844|pdb|1C9L|A Chain A, Peptide-In-Groove Interactions Link Target Proteins To The B-Propeller Of Clathrin >gi|7245845|pdb|1C9L|B Chain B, Peptide-In-Groove Interactions Link Target Proteins To The B-Propeller Of Clathrin	Library		-0.821401		-0.761951		-0.869478
ENSG00000141367	ENST00000269122	ENSP00000269122	CLTC	CLTC-001	PRINCIPAL:1	37	F	TTC								0.0220764	2	207			TRUE		6			-12.367	0.211096		E	1C9L	gi|7245844|pdb|1C9L|A Chain A, Peptide-In-Groove Interactions Link Target Proteins To The B-Propeller Of Clathrin >gi|7245845|pdb|1C9L|B Chain B, Peptide-In-Groove Interactions Link Target Proteins To The B-Propeller Of Clathrin	Library		-0.818457		-0.753392		-0.864828
ENSG00000141367	ENST00000269122	ENSP00000269122	CLTC	CLTC-001	PRINCIPAL:1	38	I	ATC								0.022673	2	207			TRUE		6			-11.046	0.185473		E	1C9L	gi|7245844|pdb|1C9L|A Chain A, Peptide-In-Groove Interactions Link Target Proteins To The B-Propeller Of Clathrin >gi|7245845|pdb|1C9L|B Chain B, Peptide-In-Groove Interactions Link Target Proteins To The B-Propeller Of Clathrin	Library		-0.815625		-0.744915		-0.860162
ENSG00000141367	ENST00000269122	ENSP00000269122	CLTC	CLTC-001	PRINCIPAL:1	39	C	TGC								0.0232697	2	207			TRUE		6			-14.012	0.17675		E	1C9L	gi|7245844|pdb|1C9L|A Chain A, Peptide-In-Groove Interactions Link Target Proteins To The B-Propeller Of Clathrin >gi|7245845|pdb|1C9L|B Chain B, Peptide-In-Groove Interactions Link Target Proteins To The B-Propeller Of Clathrin	Library		-0.812911		-0.736527		-0.855481
ENSG00000141367	ENST00000269122	ENSP00000269122	CLTC	CLTC-001	PRINCIPAL:1	40	I	ATT								0.0238663	2	207			TRUE		6			-10.601	0.20867		E	1C9L	gi|7245844|pdb|1C9L|A Chain A, Peptide-In-Groove Interactions Link Target Proteins To The B-Propeller Of Clathrin >gi|7245845|pdb|1C9L|B Chain B, Peptide-In-Groove Interactions Link Target Proteins To The B-Propeller Of Clathrin	Library		-0.810319		-0.728235		-0.850785
ENSG00000141367	ENST00000269122	ENSP00000269122	CLTC	CLTC-001	PRINCIPAL:1	41	R	AGA								0.024463	2	207			TRUE		6			-11.438	0.228481		E	1C9L	gi|7245844|pdb|1C9L|A Chain A, Peptide-In-Groove Interactions Link Target Proteins To The B-Propeller Of Clathrin >gi|7245845|pdb|1C9L|B Chain B, Peptide-In-Groove Interactions Link Target Proteins To The B-Propeller Of Clathrin	Library		-0.807854		-0.720045		-0.846074
ENSG00000141367	ENST00000269122	ENSP00000269122	CLTC	CLTC-001	PRINCIPAL:1	42	E	GAA	ATCTGCATTAGAGAAAAAGT	chr17	57721722	+	45	89	63	0.0250597	2	207	85	122	TRUE	FALSE	6	4	0.666667	-11.696	0.23915		E	1C9L	gi|7245844|pdb|1C9L|A Chain A, Peptide-In-Groove Interactions Link Target Proteins To The B-Propeller Of Clathrin >gi|7245845|pdb|1C9L|B Chain B, Peptide-In-Groove Interactions Link Target Proteins To The B-Propeller Of Clathrin	Library	-0.98	-0.80552	-0.835451	-0.711962	-1.08	-0.841351
ENSG00000141367	ENST00000269122	ENSP00000269122	CLTC	CLTC-001	PRINCIPAL:1	43	K	AAA	ATCTGCATTAGAGAAAAAGT	chr17	57721722	+	45	89	63	0.0256563	2	207	85	122	TRUE	FALSE	6	4	0.666667	-11.186	0.262073		C	1C9L	gi|7245844|pdb|1C9L|A Chain A, Peptide-In-Groove Interactions Link Target Proteins To The B-Propeller Of Clathrin >gi|7245845|pdb|1C9L|B Chain B, Peptide-In-Groove Interactions Link Target Proteins To The B-Propeller Of Clathrin	Library	-0.98	-0.803322	-0.835451	-0.703992	-1.08	-0.836614
ENSG00000141367	ENST00000269122	ENSP00000269122	CLTC	CLTC-001	PRINCIPAL:1	44	V	GTA								0.026253	2	207			TRUE		6			-10.716	0.282574		C	1C9L	gi|7245844|pdb|1C9L|A Chain A, Peptide-In-Groove Interactions Link Target Proteins To The B-Propeller Of Clathrin >gi|7245845|pdb|1C9L|B Chain B, Peptide-In-Groove Interactions Link Target Proteins To The B-Propeller Of Clathrin	Library		-0.801263		-0.696138		-0.831864
ENSG00000141367	ENST00000269122	ENSP00000269122	CLTC	CLTC-001	PRINCIPAL:1	45	G	GGA	TAGAGAAAAAGTAGGAGAGC	chr17	57721730	+	32	50	73	0.0268496	2	207	93	114	TRUE	FALSE	6	4	0.666667	-12.547	0.295219		C	1C9L	gi|7245844|pdb|1C9L|A Chain A, Peptide-In-Groove Interactions Link Target Proteins To The B-Propeller Of Clathrin >gi|7245845|pdb|1C9L|B Chain B, Peptide-In-Groove Interactions Link Target Proteins To The B-Propeller Of Clathrin	Library	-1.69	-0.799345	-1.98976	-0.688404	-1.7	-0.827099
ENSG00000141367	ENST00000269122	ENSP00000269122	CLTC	CLTC-001	PRINCIPAL:1	46	E	GAG	TAGAGAAAAAGTAGGAGAGC	chr17	57721730	+	32	50	73	0.0274463	2	207	93	114	TRUE	FALSE	6	4	0.666667	-10.869	0.307673		C	1C9L	gi|7245844|pdb|1C9L|A Chain A, Peptide-In-Groove Interactions Link Target Proteins To The B-Propeller Of Clathrin >gi|7245845|pdb|1C9L|B Chain B, Peptide-In-Groove Interactions Link Target Proteins To The B-Propeller Of Clathrin	Library	-1.69	-0.797572	-1.98976	-0.68079	-1.7	-0.822316
ENSG00000141367	ENST00000269122	ENSP00000269122	CLTC	CLTC-001	PRINCIPAL:1	47	Q	CAG	AAAAGTAGGAGAGCAGGCCC	chr17	57721736	+	56	66	56	0.028043	2	207	99	108	TRUE	FALSE	6	4	0.666667	-10.5	0.312957		C	1C9L	gi|7245844|pdb|1C9L|A Chain A, Peptide-In-Groove Interactions Link Target Proteins To The B-Propeller Of Clathrin >gi|7245845|pdb|1C9L|B Chain B, Peptide-In-Groove Interactions Link Target Proteins To The B-Propeller Of Clathrin	Library	-0.65	-0.79594	-0.00589165	-0.673294	-0.12	-0.817512
ENSG00000141367	ENST00000269122	ENSP00000269122	CLTC	CLTC-001	PRINCIPAL:1	48	A	GCC	AAAAGTAGGAGAGCAGGCCC	chr17	57721736	+	56	66	56	0.0286396	2	207	99	108	TRUE	FALSE	6	4	0.666667	-9.259	0.306192		C	1C9L	gi|7245844|pdb|1C9L|A Chain A, Peptide-In-Groove Interactions Link Target Proteins To The B-Propeller Of Clathrin >gi|7245845|pdb|1C9L|B Chain B, Peptide-In-Groove Interactions Link Target Proteins To The B-Propeller Of Clathrin	Library	-0.65	-0.794445	-0.00589165	-0.665905	-0.12	-0.812679
ENSG00000141367	ENST00000269122	ENSP00000269122	CLTC	CLTC-001	PRINCIPAL:1	48	A	GCC	AGTAGGAGAGCAGGCCCAGG	chr17	57721739	+	36	89	60	0.0286396	2	207	102	105	TRUE	FALSE	6	4	0.666667	-9.259	0.306192		C	1C9L	gi|7245844|pdb|1C9L|A Chain A, Peptide-In-Groove Interactions Link Target Proteins To The B-Propeller Of Clathrin >gi|7245845|pdb|1C9L|B Chain B, Peptide-In-Groove Interactions Link Target Proteins To The B-Propeller Of Clathrin	Library		-0.794445		-0.665905		-0.812679
ENSG00000141367	ENST00000269122	ENSP00000269122	CLTC	CLTC-001	PRINCIPAL:1	49	Q	CAG	TCATATCAATGATTACCACC	chr17	57721743	-	70	81	59	0.0292363	2	207	106	101	TRUE	FALSE	6	4	0.666667	-11.398	0.301753		E	1C9L	gi|7245844|pdb|1C9L|A Chain A, Peptide-In-Groove Interactions Link Target Proteins To The B-Propeller Of Clathrin >gi|7245845|pdb|1C9L|B Chain B, Peptide-In-Groove Interactions Link Target Proteins To The B-Propeller Of Clathrin	Library	-0.48	-0.793079	-0.48468	-0.658612	-1.02	-0.807808
ENSG00000141367	ENST00000269122	ENSP00000269122	CLTC	CLTC-001	PRINCIPAL:1	49	Q	CAG	CATATCAATGATTACCACCT	chr17	57721742	-	78	75	56	0.0292363	2	207	105	102	TRUE	FALSE	6	4	0.666667	-11.398	0.301753		E	1C9L	gi|7245844|pdb|1C9L|A Chain A, Peptide-In-Groove Interactions Link Target Proteins To The B-Propeller Of Clathrin >gi|7245845|pdb|1C9L|B Chain B, Peptide-In-Groove Interactions Link Target Proteins To The B-Propeller Of Clathrin	Library		-0.793079		-0.658612		-0.807808
ENSG00000141367	ENST00000269122	ENSP00000269122	CLTC	CLTC-001	PRINCIPAL:1	49	Q	CAG	AGTAGGAGAGCAGGCCCAGG	chr17	57721739	+	36	89	60	0.0292363	2	207	102	105	TRUE	FALSE	6	4	0.666667	-11.398	0.301753		E	1C9L	gi|7245844|pdb|1C9L|A Chain A, Peptide-In-Groove Interactions Link Target Proteins To The B-Propeller Of Clathrin >gi|7245845|pdb|1C9L|B Chain B, Peptide-In-Groove Interactions Link Target Proteins To The B-Propeller Of Clathrin	Library		-0.793079		-0.658612		-0.807808
ENSG00000141367	ENST00000269122	ENSP00000269122	CLTC	CLTC-001	PRINCIPAL:1	50	V	GTG	TCATATCAATGATTACCACC	chr17	57721743	-	70	81	59	0.0298329	2	207	106	101	TRUE	FALSE	6	4	0.666667	-10.646	0.28616		E	1C9L	gi|7245844|pdb|1C9L|A Chain A, Peptide-In-Groove Interactions Link Target Proteins To The B-Propeller Of Clathrin >gi|7245845|pdb|1C9L|B Chain B, Peptide-In-Groove Interactions Link Target Proteins To The B-Propeller Of Clathrin	Library	-0.48	-0.791832	-0.48468	-0.651402	-1.02	-0.802896
ENSG00000141367	ENST00000269122	ENSP00000269122	CLTC	CLTC-001	PRINCIPAL:1	50	V	GTG	CATATCAATGATTACCACCT	chr17	57721742	-	78	75	56	0.0298329	2	207	105	102	TRUE	FALSE	6	4	0.666667	-10.646	0.28616		E	1C9L	gi|7245844|pdb|1C9L|A Chain A, Peptide-In-Groove Interactions Link Target Proteins To The B-Propeller Of Clathrin >gi|7245845|pdb|1C9L|B Chain B, Peptide-In-Groove Interactions Link Target Proteins To The B-Propeller Of Clathrin	Library		-0.791832		-0.651402		-0.802896
ENSG00000141367	ENST00000269122	ENSP00000269122	CLTC	CLTC-001	PRINCIPAL:1	51	V	GTA								0.0304296	2	207			TRUE		6			-10.646	0.298008		E	1C9L	gi|7245844|pdb|1C9L|A Chain A, Peptide-In-Groove Interactions Link Target Proteins To The B-Propeller Of Clathrin >gi|7245845|pdb|1C9L|B Chain B, Peptide-In-Groove Interactions Link Target Proteins To The B-Propeller Of Clathrin	Library		-0.790696		-0.64426		-0.797935
ENSG00000141367	ENST00000269122	ENSP00000269122	CLTC	CLTC-001	PRINCIPAL:1	52	I	ATC								0.0310263	2	207			TRUE		6			-10.599	0.292971		E	1C9L	gi|7245844|pdb|1C9L|A Chain A, Peptide-In-Groove Interactions Link Target Proteins To The B-Propeller Of Clathrin >gi|7245845|pdb|1C9L|B Chain B, Peptide-In-Groove Interactions Link Target Proteins To The B-Propeller Of Clathrin	Library		-0.789656		-0.637166		-0.792919
ENSG00000141367	ENST00000269122	ENSP00000269122	CLTC	CLTC-001	PRINCIPAL:1	53	I	ATT								0.0316229	2	207			TRUE		6			-10.599	0.314055		E	1C9L	gi|7245844|pdb|1C9L|A Chain A, Peptide-In-Groove Interactions Link Target Proteins To The B-Propeller Of Clathrin >gi|7245845|pdb|1C9L|B Chain B, Peptide-In-Groove Interactions Link Target Proteins To The B-Propeller Of Clathrin	Library		-0.788698		-0.630096		-0.787841
ENSG00000141367	ENST00000269122	ENSP00000269122	CLTC	CLTC-001	PRINCIPAL:1	54	D	GAT								0.0322196	2	207			TRUE		6			-12.626	0.361534		E	1C9L	gi|7245844|pdb|1C9L|A Chain A, Peptide-In-Groove Interactions Link Target Proteins To The B-Propeller Of Clathrin >gi|7245845|pdb|1C9L|B Chain B, Peptide-In-Groove Interactions Link Target Proteins To The B-Propeller Of Clathrin	Library		-0.7878		-0.623016		-0.782695
ENSG00000141367	ENST00000269122	ENSP00000269122	CLTC	CLTC-001	PRINCIPAL:1	55	M	ATG								0.0328162	2	207			TRUE		6			-10.874	0.407074		C	1C9L	gi|7245844|pdb|1C9L|A Chain A, Peptide-In-Groove Interactions Link Target Proteins To The B-Propeller Of Clathrin >gi|7245845|pdb|1C9L|B Chain B, Peptide-In-Groove Interactions Link Target Proteins To The B-Propeller Of Clathrin	Library		-0.786938		-0.615886		-0.777476
ENSG00000141367	ENST00000269122	ENSP00000269122	CLTC	CLTC-001	PRINCIPAL:1	56	N	AAT								0.0334129	2	207			TRUE		6			-9.256	0.469605		C	1C9L	gi|7245844|pdb|1C9L|A Chain A, Peptide-In-Groove Interactions Link Target Proteins To The B-Propeller Of Clathrin >gi|7245845|pdb|1C9L|B Chain B, Peptide-In-Groove Interactions Link Target Proteins To The B-Propeller Of Clathrin	Library		-0.786083		-0.608657		-0.772182
ENSG00000141367	ENST00000269122	ENSP00000269122	CLTC	CLTC-001	PRINCIPAL:1	57	D	GAC								0.0340095	2	207			TRUE		6			-11.037	0.503481		C	1C9L	gi|7245844|pdb|1C9L|A Chain A, Peptide-In-Groove Interactions Link Target Proteins To The B-Propeller Of Clathrin >gi|7245845|pdb|1C9L|B Chain B, Peptide-In-Groove Interactions Link Target Proteins To The B-Propeller Of Clathrin	Library		-0.785202		-0.60127		-0.76682
ENSG00000141367	ENST00000269122	ENSP00000269122	CLTC	CLTC-001	PRINCIPAL:1	58	P	CCA	GTCTTCGAATTGGATTACTT	chr17	57721770	-	81	69	66	0.0346062	2	207	133	74	TRUE	FALSE	6	4	0.666667	-11.14	0.548025		C	1C9L	gi|7245844|pdb|1C9L|A Chain A, Peptide-In-Groove Interactions Link Target Proteins To The B-Propeller Of Clathrin >gi|7245845|pdb|1C9L|B Chain B, Peptide-In-Groove Interactions Link Target Proteins To The B-Propeller Of Clathrin	Library	-0.41	-0.784265	-0.542709	-0.593663	0.17	-0.761408
ENSG00000141367	ENST00000269122	ENSP00000269122	CLTC	CLTC-001	PRINCIPAL:1	58	P	CCA	GGTCTTCGAATTGGATTACT	chr17	57721771	-	82	19	62	0.0346062	2	207	134	73	TRUE	FALSE	6	4	0.666667	-11.14	0.548025		C	1C9L	gi|7245844|pdb|1C9L|A Chain A, Peptide-In-Groove Interactions Link Target Proteins To The B-Propeller Of Clathrin >gi|7245845|pdb|1C9L|B Chain B, Peptide-In-Groove Interactions Link Target Proteins To The B-Propeller Of Clathrin	Library	-0.25	-0.784265	0.0228662	-0.593663	-0.5	-0.761408
ENSG00000141367	ENST00000269122	ENSP00000269122	CLTC	CLTC-001	PRINCIPAL:1	59	S	AGT	GGTCTTCGAATTGGATTACT	chr17	57721771	-	82	19	62	0.0352029	2	207	134	73	TRUE	FALSE	6	4	0.666667	-7.748	0.585984		C	1C9L	gi|7245844|pdb|1C9L|A Chain A, Peptide-In-Groove Interactions Link Target Proteins To The B-Propeller Of Clathrin >gi|7245845|pdb|1C9L|B Chain B, Peptide-In-Groove Interactions Link Target Proteins To The B-Propeller Of Clathrin	Library	-0.25	-0.783257	0.0228662	-0.585782	-0.5	-0.755985
ENSG00000141367	ENST00000269122	ENSP00000269122	CLTC	CLTC-001	PRINCIPAL:1	59	S	AGT	GTCTTCGAATTGGATTACTT	chr17	57721770	-	81	69	66	0.0352029	2	207	133	74	TRUE	FALSE	6	4	0.666667	-7.748	0.585984		C	1C9L	gi|7245844|pdb|1C9L|A Chain A, Peptide-In-Groove Interactions Link Target Proteins To The B-Propeller Of Clathrin >gi|7245845|pdb|1C9L|B Chain B, Peptide-In-Groove Interactions Link Target Proteins To The B-Propeller Of Clathrin	Library	-0.41	-0.783257	-0.542709	-0.585782	0.17	-0.755985
ENSG00000141367	ENST00000269122	ENSP00000269122	CLTC	CLTC-001	PRINCIPAL:1	60	N	AAT								0.0357995	2	207			TRUE		6			-8.715	0.616085		C	1C9L	gi|7245844|pdb|1C9L|A Chain A, Peptide-In-Groove Interactions Link Target Proteins To The B-Propeller Of Clathrin >gi|7245845|pdb|1C9L|B Chain B, Peptide-In-Groove Interactions Link Target Proteins To The B-Propeller Of Clathrin	Library		-0.782207		-0.577608		-0.750635
ENSG00000141367	ENST00000269122	ENSP00000269122	CLTC	CLTC-001	PRINCIPAL:1	61	P	CCA	GCTGAAATTGGTCTTCGAAT	chr17	57721780	-	91	12	55	0.0363962	2	207	143	64	TRUE	FALSE	6	4	0.666667	-11.964	0.628379		C	1C9L	gi|7245844|pdb|1C9L|A Chain A, Peptide-In-Groove Interactions Link Target Proteins To The B-Propeller Of Clathrin >gi|7245845|pdb|1C9L|B Chain B, Peptide-In-Groove Interactions Link Target Proteins To The B-Propeller Of Clathrin	Library	-0.77	-0.781237	-0.242538	-0.569218	-0.94	-0.745504
ENSG00000141367	ENST00000269122	ENSP00000269122	CLTC	CLTC-001	PRINCIPAL:1	62	I	ATT	GCTGAAATTGGTCTTCGAAT	chr17	57721780	-	91	12	55	0.0369928	2	207	143	64	TRUE	FALSE	6	4	0.666667	-10.091	0.642041		C	1C9L	gi|7245844|pdb|1C9L|A Chain A, Peptide-In-Groove Interactions Link Target Proteins To The B-Propeller Of Clathrin >gi|7245845|pdb|1C9L|B Chain B, Peptide-In-Groove Interactions Link Target Proteins To The B-Propeller Of Clathrin	Library	-0.77	-0.780632	-0.242538	-0.560861	-0.94	-0.740814
ENSG00000141367	ENST00000269122	ENSP00000269122	CLTC	CLTC-001	PRINCIPAL:1	63	R	CGA								0.0375895	2	207			TRUE		6			-11.409	0.639332		C	1C9L	gi|7245844|pdb|1C9L|A Chain A, Peptide-In-Groove Interactions Link Target Proteins To The B-Propeller Of Clathrin >gi|7245845|pdb|1C9L|B Chain B, Peptide-In-Groove Interactions Link Target Proteins To The B-Propeller Of Clathrin	Library		-0.780922		-0.553071		-0.736846
ENSG00000141367	ENST00000269122	ENSP00000269122	CLTC	CLTC-001	PRINCIPAL:1	64	R	AGA								0.0381862	2	207			TRUE		6			-11.409	0.618556		C	1C9L	gi|7245844|pdb|1C9L|A Chain A, Peptide-In-Groove Interactions Link Target Proteins To The B-Propeller Of Clathrin >gi|7245845|pdb|1C9L|B Chain B, Peptide-In-Groove Interactions Link Target Proteins To The B-Propeller Of Clathrin	Library		-0.782865		-0.546655		-0.733838
ENSG00000141367	ENST00000269122	ENSP00000269122	CLTC	CLTC-001	PRINCIPAL:1	65	P	CCA	ATGGCGCTGTCTGCTGAAAT	chr17	57721792	-	43	27	62	0.0387828	2	207	155	52	TRUE	FALSE	6	4	0.666667	-13.097	0.60581		C	1C9L	gi|7245844|pdb|1C9L|A Chain A, Peptide-In-Groove Interactions Link Target Proteins To The B-Propeller Of Clathrin >gi|7245845|pdb|1C9L|B Chain B, Peptide-In-Groove Interactions Link Target Proteins To The B-Propeller Of Clathrin	Library	-0.94	-0.787101	-0.422621	-0.542291	-0.11	-0.731721
ENSG00000141367	ENST00000269122	ENSP00000269122	CLTC	CLTC-001	PRINCIPAL:1	66	I	ATT	ATGGCGCTGTCTGCTGAAAT	chr17	57721792	-	43	27	62	0.0393795	2	207	155	52	TRUE	FALSE	6	4	0.666667	-11	0.583076		C	1C9L	gi|7245844|pdb|1C9L|A Chain A, Peptide-In-Groove Interactions Link Target Proteins To The B-Propeller Of Clathrin >gi|7245845|pdb|1C9L|B Chain B, Peptide-In-Groove Interactions Link Target Proteins To The B-Propeller Of Clathrin	Library	-0.94	-0.79364	-0.422621	-0.540766	-0.11	-0.728067
ENSG00000141367	ENST00000269122	ENSP00000269122	CLTC	CLTC-001	PRINCIPAL:1	67	S	TCA								0.0399761	2	207			TRUE		6			-10.439	0.55589		C	1C9L	gi|7245844|pdb|1C9L|A Chain A, Peptide-In-Groove Interactions Link Target Proteins To The B-Propeller Of Clathrin >gi|7245845|pdb|1C9L|B Chain B, Peptide-In-Groove Interactions Link Target Proteins To The B-Propeller Of Clathrin	Library		-0.801168		-0.540892		-0.721455
ENSG00000141367	ENST00000269122	ENSP00000269122	CLTC	CLTC-001	PRINCIPAL:1	68	A	GCA								0.0405728	2	207			TRUE		6			-11.043	0.565082		C	1C9L	gi|7245844|pdb|1C9L|A Chain A, Peptide-In-Groove Interactions Link Target Proteins To The B-Propeller Of Clathrin >gi|7245845|pdb|1C9L|B Chain B, Peptide-In-Groove Interactions Link Target Proteins To The B-Propeller Of Clathrin	Library		-0.809016		-0.5404		-0.71653
ENSG00000141367	ENST00000269122	ENSP00000269122	CLTC	CLTC-001	PRINCIPAL:1	69	D	GAC								0.0411695	2	207			TRUE		6			-11.633	0.573463		C	1C9L	gi|7245844|pdb|1C9L|A Chain A, Peptide-In-Groove Interactions Link Target Proteins To The B-Propeller Of Clathrin >gi|7245845|pdb|1C9L|B Chain B, Peptide-In-Groove Interactions Link Target Proteins To The B-Propeller Of Clathrin	Library		-0.816998		-0.538586		-0.713446
ENSG00000141367	ENST00000269122	ENSP00000269122	CLTC	CLTC-001	PRINCIPAL:1	70	S	AGC								0.0417661	2	207			TRUE		6			-10.812	0.574271		C	1C9L	gi|7245844|pdb|1C9L|A Chain A, Peptide-In-Groove Interactions Link Target Proteins To The B-Propeller Of Clathrin >gi|7245845|pdb|1C9L|B Chain B, Peptide-In-Groove Interactions Link Target Proteins To The B-Propeller Of Clathrin	Library		-0.827149		-0.541349		-0.705703
ENSG00000141367	ENST00000269122	ENSP00000269122	CLTC	CLTC-001	PRINCIPAL:1	71	A	GCC								0.0423628	2	207			TRUE		6			-10.465	0.565536		C	1C9L	gi|7245844|pdb|1C9L|A Chain A, Peptide-In-Groove Interactions Link Target Proteins To The B-Propeller Of Clathrin >gi|7245845|pdb|1C9L|B Chain B, Peptide-In-Groove Interactions Link Target Proteins To The B-Propeller Of Clathrin	Library		-0.839162		-0.546203		-0.698157
ENSG00000141367	ENST00000269122	ENSP00000269122	CLTC	CLTC-001	PRINCIPAL:1	72	I	ATC	TTTGCTAGCTGGATTCATGA	chr17	57721811	-	71	66	54	0.0429594	2	207	174	33	TRUE	FALSE	6	4	0.666667	-11.046	0.563348		C	1C9L	gi|7245844|pdb|1C9L|A Chain A, Peptide-In-Groove Interactions Link Target Proteins To The B-Propeller Of Clathrin >gi|7245845|pdb|1C9L|B Chain B, Peptide-In-Groove Interactions Link Target Proteins To The B-Propeller Of Clathrin	Library	-2.13	-0.852788	-1.373	-0.553106	-2.19	-0.69125
ENSG00000141367	ENST00000269122	ENSP00000269122	CLTC	CLTC-001	PRINCIPAL:1	73	M	ATG	TTTGCTAGCTGGATTCATGA	chr17	57721811	-	71	66	54	0.0435561	2	207	174	33	TRUE	FALSE	6	4	0.666667	-11.735	0.536432		C	1C9L	gi|7245844|pdb|1C9L|A Chain A, Peptide-In-Groove Interactions Link Target Proteins To The B-Propeller Of Clathrin >gi|7245845|pdb|1C9L|B Chain B, Peptide-In-Groove Interactions Link Target Proteins To The B-Propeller Of Clathrin	Library	-2.13	-0.867618	-1.373	-0.561784	-2.19	-0.685242
ENSG00000141367	ENST00000269122	ENSP00000269122	CLTC	CLTC-001	PRINCIPAL:1	74	N	AAT								0.0441527	2	207			TRUE		6			-12.196	0.513564		C	1C9L	gi|7245844|pdb|1C9L|A Chain A, Peptide-In-Groove Interactions Link Target Proteins To The B-Propeller Of Clathrin >gi|7245845|pdb|1C9L|B Chain B, Peptide-In-Groove Interactions Link Target Proteins To The B-Propeller Of Clathrin	Library		-0.883288		-0.57194		-0.680234
ENSG00000141367	ENST00000269122	ENSP00000269122	CLTC	CLTC-001	PRINCIPAL:1	75	P	CCA	AGTGCAATTACTTTGCTAGC	chr17	57721822	-	79	40	49	0.0447494	2	207	185	22	TRUE	FALSE	6	4	0.666667	-13.41	0.511272		C	1C9L	gi|7245844|pdb|1C9L|A Chain A, Peptide-In-Groove Interactions Link Target Proteins To The B-Propeller Of Clathrin >gi|7245845|pdb|1C9L|B Chain B, Peptide-In-Groove Interactions Link Target Proteins To The B-Propeller Of Clathrin	Library	0.8	-0.899522	0.671424	-0.583319	0.53	-0.67623
ENSG00000141367	ENST00000269122	ENSP00000269122	CLTC	CLTC-001	PRINCIPAL:1	76	A	GCT	AGTGCAATTACTTTGCTAGC	chr17	57721822	-	79	40	49	0.0453461	2	207	185	22	TRUE	FALSE	6	4	0.666667	-9.989	0.501869		C	1C9L	gi|7245844|pdb|1C9L|A Chain A, Peptide-In-Groove Interactions Link Target Proteins To The B-Propeller Of Clathrin >gi|7245845|pdb|1C9L|B Chain B, Peptide-In-Groove Interactions Link Target Proteins To The B-Propeller Of Clathrin	Library	0.8	-0.914808	0.671424	-0.591651	0.53	-0.672793
ENSG00000141367	ENST00000269122	ENSP00000269122	CLTC	CLTC-001	PRINCIPAL:1	77	S	AGC								0.0459427	2	207			TRUE		6			-10.172	0.477692		H	1C9L	gi|7245844|pdb|1C9L|A Chain A, Peptide-In-Groove Interactions Link Target Proteins To The B-Propeller Of Clathrin >gi|7245845|pdb|1C9L|B Chain B, Peptide-In-Groove Interactions Link Target Proteins To The B-Propeller Of Clathrin	Library		-0.93087		-0.601091		-0.669568
ENSG00000141367	ENST00000269122	ENSP00000269122	CLTC	CLTC-001	PRINCIPAL:1	78	K	AAA								0.0465394	2	207			TRUE		6			-11.266	0.448928		H	1C9L	gi|7245844|pdb|1C9L|A Chain A, Peptide-In-Groove Interactions Link Target Proteins To The B-Propeller Of Clathrin >gi|7245845|pdb|1C9L|B Chain B, Peptide-In-Groove Interactions Link Target Proteins To The B-Propeller Of Clathrin	Library		-0.946196		-0.607522		-0.665502
ENSG00000141367	ENST00000269122	ENSP00000269122	CLTC	CLTC-001	PRINCIPAL:1	79	V	GTA								0.047136	2	207			TRUE		6			-10.378	0.429541		E	1C9L	gi|7245844|pdb|1C9L|A Chain A, Peptide-In-Groove Interactions Link Target Proteins To The B-Propeller Of Clathrin >gi|7245845|pdb|1C9L|B Chain B, Peptide-In-Groove Interactions Link Target Proteins To The B-Propeller Of Clathrin	Library		-0.962191		-0.615682		-0.661289
ENSG00000141367	ENST00000269122	ENSP00000269122	CLTC	CLTC-001	PRINCIPAL:1	80	I	ATT								0.0477327	2	207			TRUE		6			-10.371	0.396157		E	1C9L	gi|7245844|pdb|1C9L|A Chain A, Peptide-In-Groove Interactions Link Target Proteins To The B-Propeller Of Clathrin >gi|7245845|pdb|1C9L|B Chain B, Peptide-In-Groove Interactions Link Target Proteins To The B-Propeller Of Clathrin	Library		-0.981378		-0.630222		-0.658763
ENSG00000141367	ENST00000269122	ENSP00000269122	CLTC	CLTC-001	PRINCIPAL:1	81	A	GCA	AGCAAAGTAATTGCACTGAA	chr17	57721839	+	54	72	67	0.0483294	2	207	202	5	TRUE	FALSE	6	4	0.666667	-10.575	0.369376		E	1C9L	gi|7245844|pdb|1C9L|A Chain A, Peptide-In-Groove Interactions Link Target Proteins To The B-Propeller Of Clathrin >gi|7245845|pdb|1C9L|B Chain B, Peptide-In-Groove Interactions Link Target Proteins To The B-Propeller Of Clathrin	Library	-1.76	-1.00042	-1.76325	-0.643673	-1.73	-0.655773
ENSG00000141367	ENST00000269122	ENSP00000269122	CLTC	CLTC-001	PRINCIPAL:1	82	L	CTG	AGCAAAGTAATTGCACTGAA	chr17	57721839	+	54	72	67	0.048926	2	207	202	5	TRUE	FALSE	6	4	0.666667	-10.202	0.382568		E	1C9L	gi|7245844|pdb|1C9L|A Chain A, Peptide-In-Groove Interactions Link Target Proteins To The B-Propeller Of Clathrin >gi|7245845|pdb|1C9L|B Chain B, Peptide-In-Groove Interactions Link Target Proteins To The B-Propeller Of Clathrin	Library	-1.76	-1.02197	-1.76325	-0.661405	-1.73	-0.654586
ENSG00000141367	ENST00000269122	ENSP00000269122	CLTC	CLTC-001	PRINCIPAL:1	83	K	AAA								0.0495227	2	207			TRUE		6			-10.297	0.356775		E	1C9L	gi|7245844|pdb|1C9L|A Chain A, Peptide-In-Groove Interactions Link Target Proteins To The B-Propeller Of Clathrin >gi|7245845|pdb|1C9L|B Chain B, Peptide-In-Groove Interactions Link Target Proteins To The B-Propeller Of Clathrin	Library		-1.04611		-0.684368		-0.656152
ENSG00000141367	ENST00000269122	ENSP00000269122	CLTC	CLTC-001	PRINCIPAL:1	84	A	GCT								0.0501193	3	207			TRUE		6			-8.904	0.337976		C	1C9L	gi|7245844|pdb|1C9L|A Chain A, Peptide-In-Groove Interactions Link Target Proteins To The B-Propeller Of Clathrin >gi|7245845|pdb|1C9L|B Chain B, Peptide-In-Groove Interactions Link Target Proteins To The B-Propeller Of Clathrin	Library		-1.07257		-0.712674		-0.661045
ENSG00000141367	ENST00000269122	ENSP00000269122	CLTC	CLTC-001	PRINCIPAL:1	85	G	GGG								0.050716	3	268			FALSE		6			-10.278	0.32176		C	1C9L	gi|7245844|pdb|1C9L|A Chain A, Peptide-In-Groove Interactions Link Target Proteins To The B-Propeller Of Clathrin >gi|7245845|pdb|1C9L|B Chain B, Peptide-In-Groove Interactions Link Target Proteins To The B-Propeller Of Clathrin	Library		-1.10164		-0.743819		-0.666215
ENSG00000141367	ENST00000269122	ENSP00000269122	CLTC	CLTC-001	PRINCIPAL:1	86	K	AAA								0.0513126	3	268			FALSE		6			-10.761	0.280526		C	1C9L	gi|7245844|pdb|1C9L|A Chain A, Peptide-In-Groove Interactions Link Target Proteins To The B-Propeller Of Clathrin >gi|7245845|pdb|1C9L|B Chain B, Peptide-In-Groove Interactions Link Target Proteins To The B-Propeller Of Clathrin	Library		-1.13218		-0.778708		-0.675167
ENSG00000141367	ENST00000269122	ENSP00000269122	CLTC	CLTC-001	PRINCIPAL:1	87	T	ACT								0.0519093	3	268			FALSE		6			-11.02	0.262213		E	1C9L	gi|7245844|pdb|1C9L|A Chain A, Peptide-In-Groove Interactions Link Target Proteins To The B-Propeller Of Clathrin >gi|7245845|pdb|1C9L|B Chain B, Peptide-In-Groove Interactions Link Target Proteins To The B-Propeller Of Clathrin	Library		-1.16567		-0.815572		-0.683723
ENSG00000141367	ENST00000269122	ENSP00000269122	CLTC	CLTC-001	PRINCIPAL:1	88	L	CTT								0.052506	3	268			FALSE		6			-10.988	0.246704		E	1C9L	gi|7245844|pdb|1C9L|A Chain A, Peptide-In-Groove Interactions Link Target Proteins To The B-Propeller Of Clathrin >gi|7245845|pdb|1C9L|B Chain B, Peptide-In-Groove Interactions Link Target Proteins To The B-Propeller Of Clathrin	Library		-1.20173		-0.855451		-0.695562
ENSG00000141367	ENST00000269122	ENSP00000269122	CLTC	CLTC-001	PRINCIPAL:1	89	Q	CAG								0.0531026	3	268			FALSE		6			-11.799	0.218757		E	1C9L	gi|7245844|pdb|1C9L|A Chain A, Peptide-In-Groove Interactions Link Target Proteins To The B-Propeller Of Clathrin >gi|7245845|pdb|1C9L|B Chain B, Peptide-In-Groove Interactions Link Target Proteins To The B-Propeller Of Clathrin	Library		-1.24107		-0.89773		-0.708817
ENSG00000141367	ENST00000269122	ENSP00000269122	CLTC	CLTC-001	PRINCIPAL:1	90	I	ATT								0.0536993	3	268			FALSE		6			-10.981	0.219057		E	1C9L	gi|7245844|pdb|1C9L|A Chain A, Peptide-In-Groove Interactions Link Target Proteins To The B-Propeller Of Clathrin >gi|7245845|pdb|1C9L|B Chain B, Peptide-In-Groove Interactions Link Target Proteins To The B-Propeller Of Clathrin	Library		-1.28212		-0.943529		-0.722443
ENSG00000141367	ENST00000269122	ENSP00000269122	CLTC	CLTC-001	PRINCIPAL:1	91	F	TTT								0.0542959	3	268			FALSE		6			-12.591	0.23504		E	1C9L	gi|7245844|pdb|1C9L|A Chain A, Peptide-In-Groove Interactions Link Target Proteins To The B-Propeller Of Clathrin >gi|7245845|pdb|1C9L|B Chain B, Peptide-In-Groove Interactions Link Target Proteins To The B-Propeller Of Clathrin	Library		-1.32644		-1.00041		-0.743048
ENSG00000141367	ENST00000269122	ENSP00000269122	CLTC	CLTC-001	PRINCIPAL:1	92	N	AAC								0.0548926	3	268			FALSE		6			-12.414	0.261695		E	1C9L	gi|7245844|pdb|1C9L|A Chain A, Peptide-In-Groove Interactions Link Target Proteins To The B-Propeller Of Clathrin >gi|7245845|pdb|1C9L|B Chain B, Peptide-In-Groove Interactions Link Target Proteins To The B-Propeller Of Clathrin	Library		-1.37248		-1.05786		-0.765104
ENSG00000141367	ENST00000269122	ENSP00000269122	CLTC	CLTC-001	PRINCIPAL:1	93	I	ATT								0.0554893	3	268			FALSE		6			-10.679	0.306617		E	1C9L	gi|7245844|pdb|1C9L|A Chain A, Peptide-In-Groove Interactions Link Target Proteins To The B-Propeller Of Clathrin >gi|7245845|pdb|1C9L|B Chain B, Peptide-In-Groove Interactions Link Target Proteins To The B-Propeller Of Clathrin	Library		-1.42152		-1.11246		-0.782713
ENSG00000141367	ENST00000269122	ENSP00000269122	CLTC	CLTC-001	PRINCIPAL:1	94	E	GAA								0.0560859	3	268			FALSE		6			-11.601	0.375847		C	1C9L	gi|7245844|pdb|1C9L|A Chain A, Peptide-In-Groove Interactions Link Target Proteins To The B-Propeller Of Clathrin >gi|7245845|pdb|1C9L|B Chain B, Peptide-In-Groove Interactions Link Target Proteins To The B-Propeller Of Clathrin	Library		-1.47545		-1.17248		-0.800305
ENSG00000141367	ENST00000269122	ENSP00000269122	CLTC	CLTC-001	PRINCIPAL:1	95	M	ATG								0.0566826	3	268			FALSE		6			-11.119	0.429651		H	1C9L	gi|7245844|pdb|1C9L|A Chain A, Peptide-In-Groove Interactions Link Target Proteins To The B-Propeller Of Clathrin >gi|7245845|pdb|1C9L|B Chain B, Peptide-In-Groove Interactions Link Target Proteins To The B-Propeller Of Clathrin	Library		-1.53357		-1.23719		-0.816536
ENSG00000141367	ENST00000269122	ENSP00000269122	CLTC	CLTC-001	PRINCIPAL:1	96	K	AAA								0.0572792	3	268			FALSE		6			-11.84	0.491582		H	1C9L	gi|7245844|pdb|1C9L|A Chain A, Peptide-In-Groove Interactions Link Target Proteins To The B-Propeller Of Clathrin >gi|7245845|pdb|1C9L|B Chain B, Peptide-In-Groove Interactions Link Target Proteins To The B-Propeller Of Clathrin	Library		-1.59341		-1.30401		-0.829306
ENSG00000141367	ENST00000269122	ENSP00000269122	CLTC	CLTC-001	PRINCIPAL:1	97	S	AGT								0.0578759	3	268			FALSE		6			-10.634	0.549207		H	1C9L	gi|7245844|pdb|1C9L|A Chain A, Peptide-In-Groove Interactions Link Target Proteins To The B-Propeller Of Clathrin >gi|7245845|pdb|1C9L|B Chain B, Peptide-In-Groove Interactions Link Target Proteins To The B-Propeller Of Clathrin	Library		-1.65021		-1.36799		-0.836061
ENSG00000141367	ENST00000269122	ENSP00000269122	CLTC	CLTC-001	PRINCIPAL:1	98	K	AAA	TGAAATGAAAAGTAAAATGA	chr17	57724803	+	9	56	65	0.0584726	3	268	44	224	FALSE	FALSE	6	4	0.666667	-11.858	0.639166		H	1C9L	gi|7245844|pdb|1C9L|A Chain A, Peptide-In-Groove Interactions Link Target Proteins To The B-Propeller Of Clathrin >gi|7245845|pdb|1C9L|B Chain B, Peptide-In-Groove Interactions Link Target Proteins To The B-Propeller Of Clathrin	Library		-1.69113		-1.43038		-0.859368
ENSG00000141367	ENST00000269122	ENSP00000269122	CLTC	CLTC-001	PRINCIPAL:1	99	M	ATG	TGAAATGAAAAGTAAAATGA	chr17	57724803	+	9	56	65	0.0590692	3	268	44	224	FALSE	FALSE	6	4	0.666667	-11.003	0.657865		H	1C9L	gi|7245844|pdb|1C9L|A Chain A, Peptide-In-Groove Interactions Link Target Proteins To The B-Propeller Of Clathrin >gi|7245845|pdb|1C9L|B Chain B, Peptide-In-Groove Interactions Link Target Proteins To The B-Propeller Of Clathrin	Library		-1.71397		-1.48822		-0.903898
ENSG00000141367	ENST00000269122	ENSP00000269122	CLTC	CLTC-001	PRINCIPAL:1	100	K	AAG								0.0596659	3	268			FALSE		6			-11.788	0.684413		H	1C9L	gi|7245844|pdb|1C9L|A Chain A, Peptide-In-Groove Interactions Link Target Proteins To The B-Propeller Of Clathrin >gi|7245845|pdb|1C9L|B Chain B, Peptide-In-Groove Interactions Link Target Proteins To The B-Propeller Of Clathrin	Library		-1.72788		-1.53235		-0.942717
ENSG00000141367	ENST00000269122	ENSP00000269122	CLTC	CLTC-001	PRINCIPAL:1	101	A	GCT								0.0602625	3	268			FALSE		6			-10.341	0.654013		C	1C9L	gi|7245844|pdb|1C9L|A Chain A, Peptide-In-Groove Interactions Link Target Proteins To The B-Propeller Of Clathrin >gi|7245845|pdb|1C9L|B Chain B, Peptide-In-Groove Interactions Link Target Proteins To The B-Propeller Of Clathrin	Library		-1.73576		-1.56459		-0.974236
ENSG00000141367	ENST00000269122	ENSP00000269122	CLTC	CLTC-001	PRINCIPAL:1	102	H	CAT								0.0608592	3	268			FALSE		6			-13.51	0.57951		C	1C9L	gi|7245844|pdb|1C9L|A Chain A, Peptide-In-Groove Interactions Link Target Proteins To The B-Propeller Of Clathrin >gi|7245845|pdb|1C9L|B Chain B, Peptide-In-Groove Interactions Link Target Proteins To The B-Propeller Of Clathrin	Library		-1.75123		-1.59611		-0.990933
ENSG00000141367	ENST00000269122	ENSP00000269122	CLTC	CLTC-001	PRINCIPAL:1	103	T	ACC								0.0614558	3	268			FALSE		6			-9.982	0.498322		C	1C9L	gi|7245844|pdb|1C9L|A Chain A, Peptide-In-Groove Interactions Link Target Proteins To The B-Propeller Of Clathrin >gi|7245845|pdb|1C9L|B Chain B, Peptide-In-Groove Interactions Link Target Proteins To The B-Propeller Of Clathrin	Library		-1.76232		-1.6217		-1.00506
ENSG00000141367	ENST00000269122	ENSP00000269122	CLTC	CLTC-001	PRINCIPAL:1	104	M	ATG	AAAGGTGACATCATCAGTCA	chr17	57724821	-	52	84	51	0.0620525	3	268	62	206	FALSE	FALSE	6	3	0.5	-11.086	0.418355		C	1C9L	gi|7245844|pdb|1C9L|A Chain A, Peptide-In-Groove Interactions Link Target Proteins To The B-Propeller Of Clathrin >gi|7245845|pdb|1C9L|B Chain B, Peptide-In-Groove Interactions Link Target Proteins To The B-Propeller Of Clathrin	Library		-1.76961		-1.6421		-1.01686
ENSG00000141367	ENST00000269122	ENSP00000269122	CLTC	CLTC-001	PRINCIPAL:1	105	T	ACT	AAAGGTGACATCATCAGTCA	chr17	57724821	-	52	84	51	0.0626492	3	268	62	206	FALSE	FALSE	6	3	0.5	-9.186	0.319894		C	1C9L	gi|7245844|pdb|1C9L|A Chain A, Peptide-In-Groove Interactions Link Target Proteins To The B-Propeller Of Clathrin >gi|7245845|pdb|1C9L|B Chain B, Peptide-In-Groove Interactions Link Target Proteins To The B-Propeller Of Clathrin	Library		-1.76507		-1.65127		-1.03361
ENSG00000141367	ENST00000269122	ENSP00000269122	CLTC	CLTC-001	PRINCIPAL:1	106	D	GAT								0.0632458	3	268			FALSE		6			-9.926	0.239717		C	1C9L	gi|7245844|pdb|1C9L|A Chain A, Peptide-In-Groove Interactions Link Target Proteins To The B-Propeller Of Clathrin >gi|7245845|pdb|1C9L|B Chain B, Peptide-In-Groove Interactions Link Target Proteins To The B-Propeller Of Clathrin	Library		-1.76683		-1.66362		-1.04098
ENSG00000141367	ENST00000269122	ENSP00000269122	CLTC	CLTC-001	PRINCIPAL:1	107	D	GAT								0.0638425	3	268			FALSE		6			-9.926	0.188091		C	1C9L	gi|7245844|pdb|1C9L|A Chain A, Peptide-In-Groove Interactions Link Target Proteins To The B-Propeller Of Clathrin >gi|7245845|pdb|1C9L|B Chain B, Peptide-In-Groove Interactions Link Target Proteins To The B-Propeller Of Clathrin	Library		-1.76624		-1.6727		-1.04666
ENSG00000141367	ENST00000269122	ENSP00000269122	CLTC	CLTC-001	PRINCIPAL:1	108	V	GTC	TGACTGATGATGTCACCTTT	chr17	57724835	+	66	18	68	0.0644391	3	268	76	192	FALSE	FALSE	6	3	0.5	-10.652	0.132853		E	1C9L	gi|7245844|pdb|1C9L|A Chain A, Peptide-In-Groove Interactions Link Target Proteins To The B-Propeller Of Clathrin >gi|7245845|pdb|1C9L|B Chain B, Peptide-In-Groove Interactions Link Target Proteins To The B-Propeller Of Clathrin	Library		-1.75479		-1.67071		-1.05394
ENSG00000141367	ENST00000269122	ENSP00000269122	CLTC	CLTC-001	PRINCIPAL:1	109	T	ACC	TGACTGATGATGTCACCTTT	chr17	57724835	+	66	18	68	0.0650358	3	268	76	192	FALSE	FALSE	6	3	0.5	-8.011	0.0989		E	1C9L	gi|7245844|pdb|1C9L|A Chain A, Peptide-In-Groove Interactions Link Target Proteins To The B-Propeller Of Clathrin >gi|7245845|pdb|1C9L|B Chain B, Peptide-In-Groove Interactions Link Target Proteins To The B-Propeller Of Clathrin	Library		-1.7404		-1.66384		-1.05559
ENSG00000141367	ENST00000269122	ENSP00000269122	CLTC	CLTC-001	PRINCIPAL:1	110	F	TTT	ATGATGTCACCTTTTGGAAA	chr17	57724841	+	39	27	54	0.0656325	3	268	82	186	FALSE	FALSE	6	3	0.5	-12.524	0.080695		E	1C9L	gi|7245844|pdb|1C9L|A Chain A, Peptide-In-Groove Interactions Link Target Proteins To The B-Propeller Of Clathrin >gi|7245845|pdb|1C9L|B Chain B, Peptide-In-Groove Interactions Link Target Proteins To The B-Propeller Of Clathrin	Library		-1.73321		-1.66288		-1.05324
ENSG00000141367	ENST00000269122	ENSP00000269122	CLTC	CLTC-001	PRINCIPAL:1	110	F	TTT	CAAAGAGATCCATTTCCAAA	chr17	57724839	-	46	46	70	0.0656325	3	268	80	188	FALSE	FALSE	6	3	0.5	-12.524	0.080695		E	1C9L	gi|7245844|pdb|1C9L|A Chain A, Peptide-In-Groove Interactions Link Target Proteins To The B-Propeller Of Clathrin >gi|7245845|pdb|1C9L|B Chain B, Peptide-In-Groove Interactions Link Target Proteins To The B-Propeller Of Clathrin	Library	-1.51	-1.73321	-0.653199	-1.66288	0.36	-1.05324
ENSG00000141367	ENST00000269122	ENSP00000269122	CLTC	CLTC-001	PRINCIPAL:1	111	W	TGG	ATGATGTCACCTTTTGGAAA	chr17	57724841	+	39	27	54	0.0662291	3	268	82	186	FALSE	FALSE	6	3	0.5	-16.616	0.063092		E	1C9L	gi|7245844|pdb|1C9L|A Chain A, Peptide-In-Groove Interactions Link Target Proteins To The B-Propeller Of Clathrin >gi|7245845|pdb|1C9L|B Chain B, Peptide-In-Groove Interactions Link Target Proteins To The B-Propeller Of Clathrin	Library		-1.72415		-1.65904		-1.04885
ENSG00000141367	ENST00000269122	ENSP00000269122	CLTC	CLTC-001	PRINCIPAL:1	111	W	TGG	CAAAGAGATCCATTTCCAAA	chr17	57724839	-	46	46	70	0.0662291	3	268	80	188	FALSE	FALSE	6	3	0.5	-16.616	0.063092		E	1C9L	gi|7245844|pdb|1C9L|A Chain A, Peptide-In-Groove Interactions Link Target Proteins To The B-Propeller Of Clathrin >gi|7245845|pdb|1C9L|B Chain B, Peptide-In-Groove Interactions Link Target Proteins To The B-Propeller Of Clathrin	Library	-1.51	-1.72415	-0.653199	-1.65904	0.36	-1.04885
ENSG00000141367	ENST00000269122	ENSP00000269122	CLTC	CLTC-001	PRINCIPAL:1	112	K	AAA								0.0668258	3	268			FALSE		6			-11.328	0.050638		E	1C9L	gi|7245844|pdb|1C9L|A Chain A, Peptide-In-Groove Interactions Link Target Proteins To The B-Propeller Of Clathrin >gi|7245845|pdb|1C9L|B Chain B, Peptide-In-Groove Interactions Link Target Proteins To The B-Propeller Of Clathrin	Library		-1.70206		-1.63985		-1.03855
ENSG00000141367	ENST00000269122	ENSP00000269122	CLTC	CLTC-001	PRINCIPAL:1	113	W	TGG								0.0674224	3	268			FALSE		6			-16.616	0.046189		E	1C9L	gi|7245844|pdb|1C9L|A Chain A, Peptide-In-Groove Interactions Link Target Proteins To The B-Propeller Of Clathrin >gi|7245845|pdb|1C9L|B Chain B, Peptide-In-Groove Interactions Link Target Proteins To The B-Propeller Of Clathrin	Library		-1.68855		-1.62931		-1.02918
ENSG00000141367	ENST00000269122	ENSP00000269122	CLTC	CLTC-001	PRINCIPAL:1	114	I	ATC								0.0680191	3	268			FALSE		6			-10.761	0.042911		E	1C9L	gi|7245844|pdb|1C9L|A Chain A, Peptide-In-Groove Interactions Link Target Proteins To The B-Propeller Of Clathrin >gi|7245845|pdb|1C9L|B Chain B, Peptide-In-Groove Interactions Link Target Proteins To The B-Propeller Of Clathrin	Library		-1.68555		-1.63035		-1.02445
ENSG00000141367	ENST00000269122	ENSP00000269122	CLTC	CLTC-001	PRINCIPAL:1	115	S	TCT								0.0686158	3	268			FALSE		6			-10.211	0.040961		C	1C9L	gi|7245844|pdb|1C9L|A Chain A, Peptide-In-Groove Interactions Link Target Proteins To The B-Propeller Of Clathrin >gi|7245845|pdb|1C9L|B Chain B, Peptide-In-Groove Interactions Link Target Proteins To The B-Propeller Of Clathrin	Library		-1.68151		-1.62963		-1.01985
ENSG00000141367	ENST00000269122	ENSP00000269122	CLTC	CLTC-001	PRINCIPAL:1	116	L	TTG	GAAATGGATCTCTTTGAATA	chr17	57724857	+	55	30	80	0.0692124	3	268	98	170	FALSE	FALSE	6	3	0.5	-8.551	0.044375		C	1C9L	gi|7245844|pdb|1C9L|A Chain A, Peptide-In-Groove Interactions Link Target Proteins To The B-Propeller Of Clathrin >gi|7245845|pdb|1C9L|B Chain B, Peptide-In-Groove Interactions Link Target Proteins To The B-Propeller Of Clathrin	Library	-2.12	-1.67623	-2.04636	-1.62694	-0.53	-1.01575
ENSG00000141367	ENST00000269122	ENSP00000269122	CLTC	CLTC-001	PRINCIPAL:1	117	N	AAT	GAAATGGATCTCTTTGAATA	chr17	57724857	+	55	30	80	0.0698091	3	268	98	170	FALSE	FALSE	6	3	0.5	-11.681	0.052942		C	1C9L	gi|7245844|pdb|1C9L|A Chain A, Peptide-In-Groove Interactions Link Target Proteins To The B-Propeller Of Clathrin >gi|7245845|pdb|1C9L|B Chain B, Peptide-In-Groove Interactions Link Target Proteins To The B-Propeller Of Clathrin	Library	-2.12	-1.66949	-2.04636	-1.62225	-0.53	-1.0123
ENSG00000141367	ENST00000269122	ENSP00000269122	CLTC	CLTC-001	PRINCIPAL:1	118	T	ACG								0.0704057	3	268			FALSE		6			-11.379	0.05833		E	1C9L	gi|7245844|pdb|1C9L|A Chain A, Peptide-In-Groove Interactions Link Target Proteins To The B-Propeller Of Clathrin >gi|7245845|pdb|1C9L|B Chain B, Peptide-In-Groove Interactions Link Target Proteins To The B-Propeller Of Clathrin	Library		-1.64953		-1.6031		-1.00175
ENSG00000141367	ENST00000269122	ENSP00000269122	CLTC	CLTC-001	PRINCIPAL:1	119	V	GTT								0.0710024	3	268			FALSE		6			-10.415	0.068059		E	1C9L	gi|7245844|pdb|1C9L|A Chain A, Peptide-In-Groove Interactions Link Target Proteins To The B-Propeller Of Clathrin >gi|7245845|pdb|1C9L|B Chain B, Peptide-In-Groove Interactions Link Target Proteins To The B-Propeller Of Clathrin	Library		-1.6399		-1.59564		-0.99883
ENSG00000141367	ENST00000269122	ENSP00000269122	CLTC	CLTC-001	PRINCIPAL:1	120	A	GCT								0.071599	3	268			FALSE		6			-10.54	0.096706		E	1C9L	gi|7245844|pdb|1C9L|A Chain A, Peptide-In-Groove Interactions Link Target Proteins To The B-Propeller Of Clathrin >gi|7245845|pdb|1C9L|B Chain B, Peptide-In-Groove Interactions Link Target Proteins To The B-Propeller Of Clathrin	Library		-1.60474		-1.56053		-0.980572
ENSG00000141367	ENST00000269122	ENSP00000269122	CLTC	CLTC-001	PRINCIPAL:1	121	L	CTT	GAATACGGTTGCTCTTGTTA	chr17	57724872	+	86	38	46	0.0721957	3	268	113	155	FALSE	FALSE	6	2	0.333333	-11.036	0.1059		E	1C9L	gi|7245844|pdb|1C9L|A Chain A, Peptide-In-Groove Interactions Link Target Proteins To The B-Propeller Of Clathrin >gi|7245845|pdb|1C9L|B Chain B, Peptide-In-Groove Interactions Link Target Proteins To The B-Propeller Of Clathrin	Library	-2.17	-1.56753	-2.52175	-1.52475	-2.26	-0.964684
ENSG00000141367	ENST00000269122	ENSP00000269122	CLTC	CLTC-001	PRINCIPAL:1	122	V	GTT	GAATACGGTTGCTCTTGTTA	chr17	57724872	+	86	38	46	0.0727924	3	268	113	155	FALSE	FALSE	6	2	0.333333	-11.07	0.123277		E	1C9L	gi|7245844|pdb|1C9L|A Chain A, Peptide-In-Groove Interactions Link Target Proteins To The B-Propeller Of Clathrin >gi|7245845|pdb|1C9L|B Chain B, Peptide-In-Groove Interactions Link Target Proteins To The B-Propeller Of Clathrin	Library	-2.17	-1.53186	-2.52175	-1.49206	-2.26	-0.952989
ENSG00000141367	ENST00000269122	ENSP00000269122	CLTC	CLTC-001	PRINCIPAL:1	123	T	ACG								0.073389	3	268			FALSE		6			-11.287	0.142364		E	1C9L	gi|7245844|pdb|1C9L|A Chain A, Peptide-In-Groove Interactions Link Target Proteins To The B-Propeller Of Clathrin >gi|7245845|pdb|1C9L|B Chain B, Peptide-In-Groove Interactions Link Target Proteins To The B-Propeller Of Clathrin	Library		-1.50017		-1.46449		-0.945601
ENSG00000141367	ENST00000269122	ENSP00000269122	CLTC	CLTC-001	PRINCIPAL:1	124	D	GAT								0.0739857	3	268			FALSE		6			-9.178	0.14716		C	1C9L	gi|7245844|pdb|1C9L|A Chain A, Peptide-In-Groove Interactions Link Target Proteins To The B-Propeller Of Clathrin >gi|7245845|pdb|1C9L|B Chain B, Peptide-In-Groove Interactions Link Target Proteins To The B-Propeller Of Clathrin	Library		-1.48023		-1.44847		-0.943096
ENSG00000141367	ENST00000269122	ENSP00000269122	CLTC	CLTC-001	PRINCIPAL:1	125	N	AAT								0.0745823	3	268			FALSE		6			-7.931	0.135073		C	1C9L	gi|7245844|pdb|1C9L|A Chain A, Peptide-In-Groove Interactions Link Target Proteins To The B-Propeller Of Clathrin >gi|7245845|pdb|1C9L|B Chain B, Peptide-In-Groove Interactions Link Target Proteins To The B-Propeller Of Clathrin	Library		-1.46692		-1.43884		-0.943446
ENSG00000141367	ENST00000269122	ENSP00000269122	CLTC	CLTC-001	PRINCIPAL:1	126	A	GCA								0.075179	3	268			FALSE		6			-9.323	0.140386		C	1C9L	gi|7245844|pdb|1C9L|A Chain A, Peptide-In-Groove Interactions Link Target Proteins To The B-Propeller Of Clathrin >gi|7245845|pdb|1C9L|B Chain B, Peptide-In-Groove Interactions Link Target Proteins To The B-Propeller Of Clathrin	Library		-1.44596		-1.4227		-0.94306
ENSG00000141367	ENST00000269122	ENSP00000269122	CLTC	CLTC-001	PRINCIPAL:1	127	V	GTT	CGGATAATGCAGTTTATCAC	chr17	57724892	+	77	40	70	0.0757757	3	268	133	135	FALSE	FALSE	6	2	0.333333	-10.294	0.143976		E	1C9L	gi|7245844|pdb|1C9L|A Chain A, Peptide-In-Groove Interactions Link Target Proteins To The B-Propeller Of Clathrin >gi|7245845|pdb|1C9L|B Chain B, Peptide-In-Groove Interactions Link Target Proteins To The B-Propeller Of Clathrin	Library	-2.28	-1.42184	-2.91372	-1.40405	-2.62	-0.942448
ENSG00000141367	ENST00000269122	ENSP00000269122	CLTC	CLTC-001	PRINCIPAL:1	128	Y	TAT	CGGATAATGCAGTTTATCAC	chr17	57724892	+	77	40	70	0.0763723	3	268	133	135	FALSE	FALSE	6	2	0.333333	-12.538	0.168856		E	1C9L	gi|7245844|pdb|1C9L|A Chain A, Peptide-In-Groove Interactions Link Target Proteins To The B-Propeller Of Clathrin >gi|7245845|pdb|1C9L|B Chain B, Peptide-In-Groove Interactions Link Target Proteins To The B-Propeller Of Clathrin	Library	-2.28	-1.40023	-2.91372	-1.3879	-2.62	-0.942833
ENSG00000141367	ENST00000269122	ENSP00000269122	CLTC	CLTC-001	PRINCIPAL:1	129	H	CAC								0.076969	3	268			FALSE		6			-13.606	0.223475		E	1C9L	gi|7245844|pdb|1C9L|A Chain A, Peptide-In-Groove Interactions Link Target Proteins To The B-Propeller Of Clathrin >gi|7245845|pdb|1C9L|B Chain B, Peptide-In-Groove Interactions Link Target Proteins To The B-Propeller Of Clathrin	Library		-1.38066		-1.37364		-0.943772
ENSG00000141367	ENST00000269122	ENSP00000269122	CLTC	CLTC-001	PRINCIPAL:1	130	W	TGG	TGCAGTTTATCACTGGAGTA	chr17	57724899	+	78	21	80	0.0775656	3	268	140	128	FALSE	FALSE	6	2	0.333333	-15.883	0.287395		E	1C9L	gi|7245844|pdb|1C9L|A Chain A, Peptide-In-Groove Interactions Link Target Proteins To The B-Propeller Of Clathrin >gi|7245845|pdb|1C9L|B Chain B, Peptide-In-Groove Interactions Link Target Proteins To The B-Propeller Of Clathrin	Library	0.45	-1.35973	0.765717	-1.35897	0.58	-0.947812
ENSG00000141367	ENST00000269122	ENSP00000269122	CLTC	CLTC-001	PRINCIPAL:1	131	S	AGT	TGCAGTTTATCACTGGAGTA	chr17	57724899	+	78	21	80	0.0781623	3	268	140	128	FALSE	FALSE	6	2	0.333333	-10.175	0.37302		E	1C9L	gi|7245844|pdb|1C9L|A Chain A, Peptide-In-Groove Interactions Link Target Proteins To The B-Propeller Of Clathrin >gi|7245845|pdb|1C9L|B Chain B, Peptide-In-Groove Interactions Link Target Proteins To The B-Propeller Of Clathrin	Library	0.45	-1.33259	0.765717	-1.33996	0.58	-0.952898
ENSG00000141367	ENST00000269122	ENSP00000269122	CLTC	CLTC-001	PRINCIPAL:1	131	S	AGT	GTTTATCACTGGAGTATGGA	chr17	57724903	+	69	78	72	0.0781623	3	268	144	124	FALSE	FALSE	6	2	0.333333	-10.175	0.37302		E	1C9L	gi|7245844|pdb|1C9L|A Chain A, Peptide-In-Groove Interactions Link Target Proteins To The B-Propeller Of Clathrin >gi|7245845|pdb|1C9L|B Chain B, Peptide-In-Groove Interactions Link Target Proteins To The B-Propeller Of Clathrin	Library	-1.99	-1.33259	-2.23329	-1.33996	-1.89	-0.952898
ENSG00000141367	ENST00000269122	ENSP00000269122	CLTC	CLTC-001	PRINCIPAL:1	132	M	ATG	GTTTATCACTGGAGTATGGA	chr17	57724903	+	69	78	72	0.0787589	3	268	144	124	FALSE	FALSE	6	2	0.333333	-10.867	0.456601		C	1C9L	gi|7245844|pdb|1C9L|A Chain A, Peptide-In-Groove Interactions Link Target Proteins To The B-Propeller Of Clathrin >gi|7245845|pdb|1C9L|B Chain B, Peptide-In-Groove Interactions Link Target Proteins To The B-Propeller Of Clathrin	Library	-1.99	-1.29939	-2.23329	-1.31699	-1.89	-0.959184
ENSG00000141367	ENST00000269122	ENSP00000269122	CLTC	CLTC-001	PRINCIPAL:1	133	E	GAA								0.0793556	3	268			FALSE		6			-11.01	0.518605		C	1C9L	gi|7245844|pdb|1C9L|A Chain A, Peptide-In-Groove Interactions Link Target Proteins To The B-Propeller Of Clathrin >gi|7245845|pdb|1C9L|B Chain B, Peptide-In-Groove Interactions Link Target Proteins To The B-Propeller Of Clathrin	Library		-1.27078		-1.29699		-0.963964
ENSG00000141367	ENST00000269122	ENSP00000269122	CLTC	CLTC-001	PRINCIPAL:1	134	G	GGA								0.0799523	3	268			FALSE		6			-11.69	0.587129		C	1C9L	gi|7245844|pdb|1C9L|A Chain A, Peptide-In-Groove Interactions Link Target Proteins To The B-Propeller Of Clathrin >gi|7245845|pdb|1C9L|B Chain B, Peptide-In-Groove Interactions Link Target Proteins To The B-Propeller Of Clathrin	Library		-1.23482		-1.27256		-0.972805
ENSG00000141367	ENST00000269122	ENSP00000269122	CLTC	CLTC-001	PRINCIPAL:1	135	E	GAG								0.0805489	3	268			FALSE		6			-9.688	0.62918		C	1C9L	gi|7245844|pdb|1C9L|A Chain A, Peptide-In-Groove Interactions Link Target Proteins To The B-Propeller Of Clathrin >gi|7245845|pdb|1C9L|B Chain B, Peptide-In-Groove Interactions Link Target Proteins To The B-Propeller Of Clathrin	Library		-1.20136		-1.24965		-0.982482
ENSG00000141367	ENST00000269122	ENSP00000269122	CLTC	CLTC-001	PRINCIPAL:1	136	S	TCT								0.0811456	3	268			FALSE		6			-10.222	0.668139		C	1C9L	gi|7245844|pdb|1C9L|A Chain A, Peptide-In-Groove Interactions Link Target Proteins To The B-Propeller Of Clathrin >gi|7245845|pdb|1C9L|B Chain B, Peptide-In-Groove Interactions Link Target Proteins To The B-Propeller Of Clathrin	Library		-1.17616		-1.23151		-0.987283
ENSG00000141367	ENST00000269122	ENSP00000269122	CLTC	CLTC-001	PRINCIPAL:1	137	Q	CAG								0.0817422	3	268			FALSE		6			-9.574	0.67969		C	1C9L	gi|7245844|pdb|1C9L|A Chain A, Peptide-In-Groove Interactions Link Target Proteins To The B-Propeller Of Clathrin >gi|7245845|pdb|1C9L|B Chain B, Peptide-In-Groove Interactions Link Target Proteins To The B-Propeller Of Clathrin	Library		-1.14841		-1.2108		-0.992848
ENSG00000141367	ENST00000269122	ENSP00000269122	CLTC	CLTC-001	PRINCIPAL:1	138	P	CCA	TGGCGATCAAACATTTTCAC	chr17	57724925	-	65	56	67	0.0823389	3	268	166	102	FALSE	FALSE	6	2	0.333333	-12.782	0.698107		C	1C9L	gi|7245844|pdb|1C9L|A Chain A, Peptide-In-Groove Interactions Link Target Proteins To The B-Propeller Of Clathrin >gi|7245845|pdb|1C9L|B Chain B, Peptide-In-Groove Interactions Link Target Proteins To The B-Propeller Of Clathrin	Library		-1.12585		-1.19245		-0.994788
ENSG00000141367	ENST00000269122	ENSP00000269122	CLTC	CLTC-001	PRINCIPAL:1	139	V	GTG	TGGCGATCAAACATTTTCAC	chr17	57724925	-	65	56	67	0.0829356	3	268	166	102	FALSE	FALSE	6	2	0.333333	-8.689	0.670605		E	1C9L	gi|7245844|pdb|1C9L|A Chain A, Peptide-In-Groove Interactions Link Target Proteins To The B-Propeller Of Clathrin >gi|7245845|pdb|1C9L|B Chain B, Peptide-In-Groove Interactions Link Target Proteins To The B-Propeller Of Clathrin	Library		-1.11031		-1.18155		-0.994726
ENSG00000141367	ENST00000269122	ENSP00000269122	CLTC	CLTC-001	PRINCIPAL:1	140	K	AAA								0.0835322	3	268			FALSE		6			-11.326	0.654071		E	1C9L	gi|7245844|pdb|1C9L|A Chain A, Peptide-In-Groove Interactions Link Target Proteins To The B-Propeller Of Clathrin >gi|7245845|pdb|1C9L|B Chain B, Peptide-In-Groove Interactions Link Target Proteins To The B-Propeller Of Clathrin	Library		-1.09536		-1.17291		-0.994534
ENSG00000141367	ENST00000269122	ENSP00000269122	CLTC	CLTC-001	PRINCIPAL:1	141	M	ATG								0.0841289	3	268			FALSE		6			-10.683	0.612701		E	1C9L	gi|7245844|pdb|1C9L|A Chain A, Peptide-In-Groove Interactions Link Target Proteins To The B-Propeller Of Clathrin >gi|7245845|pdb|1C9L|B Chain B, Peptide-In-Groove Interactions Link Target Proteins To The B-Propeller Of Clathrin	Library		-1.08089		-1.16581		-0.994578
ENSG00000141367	ENST00000269122	ENSP00000269122	CLTC	CLTC-001	PRINCIPAL:1	142	F	TTT								0.0847255	3	268			FALSE		6			-12.076	0.544273		E	1C9L	gi|7245844|pdb|1C9L|A Chain A, Peptide-In-Groove Interactions Link Target Proteins To The B-Propeller Of Clathrin >gi|7245845|pdb|1C9L|B Chain B, Peptide-In-Groove Interactions Link Target Proteins To The B-Propeller Of Clathrin	Library		-1.06693		-1.15943		-0.995086
ENSG00000141367	ENST00000269122	ENSP00000269122	CLTC	CLTC-001	PRINCIPAL:1	143	D	GAT								0.0853222	3	268			FALSE		6			-11.621	0.467559		C	1C9L	gi|7245844|pdb|1C9L|A Chain A, Peptide-In-Groove Interactions Link Target Proteins To The B-Propeller Of Clathrin >gi|7245845|pdb|1C9L|B Chain B, Peptide-In-Groove Interactions Link Target Proteins To The B-Propeller Of Clathrin	Library		-1.05277		-1.14943		-0.995194
ENSG00000141367	ENST00000269122	ENSP00000269122	CLTC	CLTC-001	PRINCIPAL:1	144	R	CGC								0.0859189	3	268			FALSE		6			-11.128	0.399074		C	1C9L	gi|7245844|pdb|1C9L|A Chain A, Peptide-In-Groove Interactions Link Target Proteins To The B-Propeller Of Clathrin >gi|7245845|pdb|1C9L|B Chain B, Peptide-In-Groove Interactions Link Target Proteins To The B-Propeller Of Clathrin	Library		-1.03964		-1.13978		-0.995082
ENSG00000141367	ENST00000269122	ENSP00000269122	CLTC	CLTC-001	PRINCIPAL:1	145	H	CAT	GGCACCCTGCAAGGCTAGAA	chr17	57724945	-	57	40	64	0.0865155	3	268	186	82	FALSE	FALSE	6	2	0.333333	-13.152	0.338649		C	1C9L	gi|7245844|pdb|1C9L|A Chain A, Peptide-In-Groove Interactions Link Target Proteins To The B-Propeller Of Clathrin >gi|7245845|pdb|1C9L|B Chain B, Peptide-In-Groove Interactions Link Target Proteins To The B-Propeller Of Clathrin	Library	-0.42	-1.02653	-0.404785	-1.12617	-0.3	-0.992815
ENSG00000141367	ENST00000269122	ENSP00000269122	CLTC	CLTC-001	PRINCIPAL:1	146	S	TCT	GGCACCCTGCAAGGCTAGAA	chr17	57724945	-	57	40	64	0.0871122	3	268	186	82	FALSE	FALSE	6	2	0.333333	-8.594	0.273441		C	1C9L	gi|7245844|pdb|1C9L|A Chain A, Peptide-In-Groove Interactions Link Target Proteins To The B-Propeller Of Clathrin >gi|7245845|pdb|1C9L|B Chain B, Peptide-In-Groove Interactions Link Target Proteins To The B-Propeller Of Clathrin	Library	-0.42	-1.01426	-0.404785	-1.11234	-0.3	-0.989209
ENSG00000141367	ENST00000269122	ENSP00000269122	CLTC	CLTC-001	PRINCIPAL:1	147	S	AGC	GATCGCCATTCTAGCCTTGC	chr17	57724951	+	89	7	55	0.0877088	3	268	192	76	FALSE	FALSE	6	2	0.333333	-8.594	0.234076		C	1C9L	gi|7245844|pdb|1C9L|A Chain A, Peptide-In-Groove Interactions Link Target Proteins To The B-Propeller Of Clathrin >gi|7245845|pdb|1C9L|B Chain B, Peptide-In-Groove Interactions Link Target Proteins To The B-Propeller Of Clathrin	Library	-0.44	-1.00285	0.382037	-1.09829	0.37	-0.984177
ENSG00000141367	ENST00000269122	ENSP00000269122	CLTC	CLTC-001	PRINCIPAL:1	147	S	AGC	ATCGCCATTCTAGCCTTGCA	chr17	57724952	+	88	63	56	0.0877088	3	268	193	75	FALSE	FALSE	6	2	0.333333	-8.594	0.234076		C	1C9L	gi|7245844|pdb|1C9L|A Chain A, Peptide-In-Groove Interactions Link Target Proteins To The B-Propeller Of Clathrin >gi|7245845|pdb|1C9L|B Chain B, Peptide-In-Groove Interactions Link Target Proteins To The B-Propeller Of Clathrin	Library	-1.04	-1.00285	-1.40454	-1.09829	-1.22	-0.984177
ENSG00000141367	ENST00000269122	ENSP00000269122	CLTC	CLTC-001	PRINCIPAL:1	148	L	CTT	TGATAATCTGGCACCCTGCA	chr17	57724954	-	70	63	60	0.0883055	3	268	195	73	FALSE	FALSE	6	2	0.333333	-10.449	0.211784		C	1C9L	gi|7245844|pdb|1C9L|A Chain A, Peptide-In-Groove Interactions Link Target Proteins To The B-Propeller Of Clathrin >gi|7245845|pdb|1C9L|B Chain B, Peptide-In-Groove Interactions Link Target Proteins To The B-Propeller Of Clathrin	Library	-1.68	-0.992339	-1.50378	-1.08403	-1.62	-0.977653
ENSG00000141367	ENST00000269122	ENSP00000269122	CLTC	CLTC-001	PRINCIPAL:1	148	L	CTT	GATCGCCATTCTAGCCTTGC	chr17	57724951	+	89	7	55	0.0883055	3	268	192	76	FALSE	FALSE	6	2	0.333333	-10.449	0.211784		C	1C9L	gi|7245844|pdb|1C9L|A Chain A, Peptide-In-Groove Interactions Link Target Proteins To The B-Propeller Of Clathrin >gi|7245845|pdb|1C9L|B Chain B, Peptide-In-Groove Interactions Link Target Proteins To The B-Propeller Of Clathrin	Library	-0.44	-0.992339	0.382037	-1.08403	0.37	-0.977653
ENSG00000141367	ENST00000269122	ENSP00000269122	CLTC	CLTC-001	PRINCIPAL:1	148	L	CTT	ATCGCCATTCTAGCCTTGCA	chr17	57724952	+	88	63	56	0.0883055	3	268	193	75	FALSE	FALSE	6	2	0.333333	-10.449	0.211784		C	1C9L	gi|7245844|pdb|1C9L|A Chain A, Peptide-In-Groove Interactions Link Target Proteins To The B-Propeller Of Clathrin >gi|7245845|pdb|1C9L|B Chain B, Peptide-In-Groove Interactions Link Target Proteins To The B-Propeller Of Clathrin	Library	-1.04	-0.992339	-1.40454	-1.08403	-1.22	-0.977653
ENSG00000141367	ENST00000269122	ENSP00000269122	CLTC	CLTC-001	PRINCIPAL:1	149	A	GCA	TGATAATCTGGCACCCTGCA	chr17	57724954	-	70	63	60	0.0889021	3	268	195	73	FALSE	FALSE	6	2	0.333333	-9.399	0.196837		C	1C9L	gi|7245844|pdb|1C9L|A Chain A, Peptide-In-Groove Interactions Link Target Proteins To The B-Propeller Of Clathrin >gi|7245845|pdb|1C9L|B Chain B, Peptide-In-Groove Interactions Link Target Proteins To The B-Propeller Of Clathrin	Library	-1.68	-0.982811	-1.50378	-1.06966	-1.62	-0.969615
ENSG00000141367	ENST00000269122	ENSP00000269122	CLTC	CLTC-001	PRINCIPAL:1	150	G	GGG								0.0894988	3	268			FALSE		6			-11.06	0.181743		C	1C9L	gi|7245844|pdb|1C9L|A Chain A, Peptide-In-Groove Interactions Link Target Proteins To The B-Propeller Of Clathrin >gi|7245845|pdb|1C9L|B Chain B, Peptide-In-Groove Interactions Link Target Proteins To The B-Propeller Of Clathrin	Library		-0.974389		-1.05534		-0.960107
ENSG00000141367	ENST00000269122	ENSP00000269122	CLTC	CLTC-001	PRINCIPAL:1	151	C	TGC								0.0900955	3	268			FALSE		6			-11.882	0.165961		C	1C9L	gi|7245844|pdb|1C9L|A Chain A, Peptide-In-Groove Interactions Link Target Proteins To The B-Propeller Of Clathrin >gi|7245845|pdb|1C9L|B Chain B, Peptide-In-Groove Interactions Link Target Proteins To The B-Propeller Of Clathrin	Library		-0.967253		-1.04137		-0.94927
ENSG00000141367	ENST00000269122	ENSP00000269122	CLTC	CLTC-001	PRINCIPAL:1	152	Q	CAG	CTGTACGGTAATTGATAATC	chr17	57724966	-	94	13	59	0.0906921	3	268	207	61	FALSE	FALSE	6	2	0.333333	-11.112	0.154212		E	1C9L	gi|7245844|pdb|1C9L|A Chain A, Peptide-In-Groove Interactions Link Target Proteins To The B-Propeller Of Clathrin >gi|7245845|pdb|1C9L|B Chain B, Peptide-In-Groove Interactions Link Target Proteins To The B-Propeller Of Clathrin	Library	-1.15	-0.961673	-1.59879	-1.02821	-0.69	-0.93742
ENSG00000141367	ENST00000269122	ENSP00000269122	CLTC	CLTC-001	PRINCIPAL:1	153	I	ATT	CTGTACGGTAATTGATAATC	chr17	57724966	-	94	13	59	0.0912888	3	268	207	61	FALSE	FALSE	6	2	0.333333	-10.078	0.134255		E	1C9L	gi|7245844|pdb|1C9L|A Chain A, Peptide-In-Groove Interactions Link Target Proteins To The B-Propeller Of Clathrin >gi|7245845|pdb|1C9L|B Chain B, Peptide-In-Groove Interactions Link Target Proteins To The B-Propeller Of Clathrin	Library	-1.15	-0.958045	-1.59879	-1.01659	-0.69	-0.925167
ENSG00000141367	ENST00000269122	ENSP00000269122	CLTC	CLTC-001	PRINCIPAL:1	154	I	ATC								0.0918854	3	268			FALSE		6			-10.078	0.134129		E	1C9L	gi|7245844|pdb|1C9L|A Chain A, Peptide-In-Groove Interactions Link Target Proteins To The B-Propeller Of Clathrin >gi|7245845|pdb|1C9L|B Chain B, Peptide-In-Groove Interactions Link Target Proteins To The B-Propeller Of Clathrin	Library		-0.956928		-1.00761		-0.913591
ENSG00000141367	ENST00000269122	ENSP00000269122	CLTC	CLTC-001	PRINCIPAL:1	155	N	AAT								0.0924821	3	268			FALSE		6			-10.584	0.128604		E	1C9L	gi|7245844|pdb|1C9L|A Chain A, Peptide-In-Groove Interactions Link Target Proteins To The B-Propeller Of Clathrin >gi|7245845|pdb|1C9L|B Chain B, Peptide-In-Groove Interactions Link Target Proteins To The B-Propeller Of Clathrin	Library		-0.95905		-1.00279		-0.904432
ENSG00000141367	ENST00000269122	ENSP00000269122	CLTC	CLTC-001	PRINCIPAL:1	156	Y	TAC								0.0930788	3	268			FALSE		6			-12.789	0.13158		E	1C9L	gi|7245844|pdb|1C9L|A Chain A, Peptide-In-Groove Interactions Link Target Proteins To The B-Propeller Of Clathrin >gi|7245845|pdb|1C9L|B Chain B, Peptide-In-Groove Interactions Link Target Proteins To The B-Propeller Of Clathrin	Library		-0.965188		-1.00392		-0.900106
ENSG00000141367	ENST00000269122	ENSP00000269122	CLTC	CLTC-001	PRINCIPAL:1	157	R	CGT	ACTTTTGTTTTGCATCTGTA	chr17	57724981	-	37	53	69	0.0936754	3	268	222	46	FALSE	FALSE	6	2	0.333333	-10.962	0.152644		E	1C9L	gi|7245844|pdb|1C9L|A Chain A, Peptide-In-Groove Interactions Link Target Proteins To The B-Propeller Of Clathrin >gi|7245845|pdb|1C9L|B Chain B, Peptide-In-Groove Interactions Link Target Proteins To The B-Propeller Of Clathrin	Library		-0.975812		-1.01242		-0.903065
ENSG00000141367	ENST00000269122	ENSP00000269122	CLTC	CLTC-001	PRINCIPAL:1	158	T	ACA	ACTTTTGTTTTGCATCTGTA	chr17	57724981	-	37	53	69	0.0942721	3	268	222	46	FALSE	FALSE	6	2	0.333333	-9.835	0.161491		E	1C9L	gi|7245844|pdb|1C9L|A Chain A, Peptide-In-Groove Interactions Link Target Proteins To The B-Propeller Of Clathrin >gi|7245845|pdb|1C9L|B Chain B, Peptide-In-Groove Interactions Link Target Proteins To The B-Propeller Of Clathrin	Library		-0.990474		-1.02793		-0.913931
ENSG00000141367	ENST00000269122	ENSP00000269122	CLTC	CLTC-001	PRINCIPAL:1	159	D	GAT								0.0948687	3	268			FALSE		6			-10.766	0.169857		C	1C9L	gi|7245844|pdb|1C9L|A Chain A, Peptide-In-Groove Interactions Link Target Proteins To The B-Propeller Of Clathrin >gi|7245845|pdb|1C9L|B Chain B, Peptide-In-Groove Interactions Link Target Proteins To The B-Propeller Of Clathrin	Library		-1.00292		-1.04346		-0.929787
ENSG00000141367	ENST00000269122	ENSP00000269122	CLTC	CLTC-001	PRINCIPAL:1	160	A	GCA								0.0954654	3	268			FALSE		6			-6.513	0.199827		C	1C9L	gi|7245844|pdb|1C9L|A Chain A, Peptide-In-Groove Interactions Link Target Proteins To The B-Propeller Of Clathrin >gi|7245845|pdb|1C9L|B Chain B, Peptide-In-Groove Interactions Link Target Proteins To The B-Propeller Of Clathrin	Library		-1.02196		-1.06675		-0.951365
ENSG00000141367	ENST00000269122	ENSP00000269122	CLTC	CLTC-001	PRINCIPAL:1	161	K	AAA	GTACAGATGCAAAACAAAAG	chr17	57724994	+	24	66	67	0.0960621	3	268	235	33	FALSE	FALSE	6	2	0.333333	-7.337	0.192497		C	1C9L	gi|7245844|pdb|1C9L|A Chain A, Peptide-In-Groove Interactions Link Target Proteins To The B-Propeller Of Clathrin >gi|7245845|pdb|1C9L|B Chain B, Peptide-In-Groove Interactions Link Target Proteins To The B-Propeller Of Clathrin	Library	-1.01	-1.04242	-0.78653	-1.09375	-0.78	-0.979595
ENSG00000141367	ENST00000269122	ENSP00000269122	CLTC	CLTC-001	PRINCIPAL:1	162	Q	CAA	GTACAGATGCAAAACAAAAG	chr17	57724994	+	24	66	67	0.0966587	3	268	235	33	FALSE	FALSE	6	2	0.333333	-8.465	0.186513		C	1C9L	gi|7245844|pdb|1C9L|A Chain A, Peptide-In-Groove Interactions Link Target Proteins To The B-Propeller Of Clathrin >gi|7245845|pdb|1C9L|B Chain B, Peptide-In-Groove Interactions Link Target Proteins To The B-Propeller Of Clathrin	Library	-1.01	-1.05641	-0.78653	-1.10716	-0.78	-0.99925
ENSG00000141367	ENST00000269122	ENSP00000269122	CLTC	CLTC-001	PRINCIPAL:1	163	K	AAG								0.0972554	3	268			FALSE		6			-9.84	0.180464		C	1C9L	gi|7245844|pdb|1C9L|A Chain A, Peptide-In-Groove Interactions Link Target Proteins To The B-Propeller Of Clathrin >gi|7245845|pdb|1C9L|B Chain B, Peptide-In-Groove Interactions Link Target Proteins To The B-Propeller Of Clathrin	Library		-1.07798		-1.12413		-1.02342
ENSG00000141367	ENST00000269122	ENSP00000269122	CLTC	CLTC-001	PRINCIPAL:1	164	W	TGG								0.097852	3	268			FALSE		6			-15.878	0.161083		E	1C9L	gi|7245844|pdb|1C9L|A Chain A, Peptide-In-Groove Interactions Link Target Proteins To The B-Propeller Of Clathrin >gi|7245845|pdb|1C9L|B Chain B, Peptide-In-Groove Interactions Link Target Proteins To The B-Propeller Of Clathrin	Library		-1.10459		-1.1431		-1.04998
ENSG00000141367	ENST00000269122	ENSP00000269122	CLTC	CLTC-001	PRINCIPAL:1	165	L	TTA								0.0984487	3	268			FALSE		6			-10.061	0.129306		E	1C9L	gi|7245844|pdb|1C9L|A Chain A, Peptide-In-Groove Interactions Link Target Proteins To The B-Propeller Of Clathrin >gi|7245845|pdb|1C9L|B Chain B, Peptide-In-Groove Interactions Link Target Proteins To The B-Propeller Of Clathrin	Library		-1.13315		-1.16201		-1.07645
ENSG00000141367	ENST00000269122	ENSP00000269122	CLTC	CLTC-001	PRINCIPAL:1	166	L	CTT	CAAAAGTGGTTACTTCTGAC	chr17	57725008	+	58	63	70	0.0990453	3	268	249	19	FALSE	FALSE	6	2	0.333333	-10.061	0.123785		E	1C9L	gi|7245844|pdb|1C9L|A Chain A, Peptide-In-Groove Interactions Link Target Proteins To The B-Propeller Of Clathrin >gi|7245845|pdb|1C9L|B Chain B, Peptide-In-Groove Interactions Link Target Proteins To The B-Propeller Of Clathrin	Library	-1.12	-1.16156	-1.5645	-1.17961	-2.1	-1.1013
ENSG00000141367	ENST00000269122	ENSP00000269122	CLTC	CLTC-001	PRINCIPAL:1	167	L	CTG	CAAAAGTGGTTACTTCTGAC	chr17	57725008	+	58	63	70	0.099642	3	268	249	19	FALSE	FALSE	6	2	0.333333	-10.061	0.123437		E	1C9L	gi|7245844|pdb|1C9L|A Chain A, Peptide-In-Groove Interactions Link Target Proteins To The B-Propeller Of Clathrin >gi|7245845|pdb|1C9L|B Chain B, Peptide-In-Groove Interactions Link Target Proteins To The B-Propeller Of Clathrin	Library	-1.12	-1.18879	-1.5645	-1.19533	-2.1	-1.12391
ENSG00000141367	ENST00000269122	ENSP00000269122	CLTC	CLTC-001	PRINCIPAL:1	168	T	ACT								0.100239	3	268			FALSE		6			-7.41	0.124258		E	1C9L	gi|7245844|pdb|1C9L|A Chain A, Peptide-In-Groove Interactions Link Target Proteins To The B-Propeller Of Clathrin >gi|7245845|pdb|1C9L|B Chain B, Peptide-In-Groove Interactions Link Target Proteins To The B-Propeller Of Clathrin	Library		-1.21439		-1.20899		-1.14408
ENSG00000141367	ENST00000269122	ENSP00000269122	CLTC	CLTC-001	PRINCIPAL:1	169	G	GGT								0.100835	3	268			FALSE		6			-11.874	0.13028		E	1C9L	gi|7245844|pdb|1C9L|A Chain A, Peptide-In-Groove Interactions Link Target Proteins To The B-Propeller Of Clathrin >gi|7245845|pdb|1C9L|B Chain B, Peptide-In-Groove Interactions Link Target Proteins To The B-Propeller Of Clathrin	Library		-1.23823		-1.22057		-1.16182
ENSG00000141367	ENST00000269122	ENSP00000269122	CLTC	CLTC-001	PRINCIPAL:1	170	I	ATA								0.101432	3	268			FALSE		6			-10.043	0.157196		E	1C9L	gi|7245844|pdb|1C9L|A Chain A, Peptide-In-Groove Interactions Link Target Proteins To The B-Propeller Of Clathrin >gi|7245845|pdb|1C9L|B Chain B, Peptide-In-Groove Interactions Link Target Proteins To The B-Propeller Of Clathrin	Library		-1.26407		-1.23938		-1.18665
ENSG00000141367	ENST00000269122	ENSP00000269122	CLTC	CLTC-001	PRINCIPAL:1	171	S	TCT	TCTGACTGGTATATCTGCAC	chr17	57725022	+	75	78	58	0.102029	3	268	263	5	FALSE	FALSE	6	2	0.333333	-9.234	0.194771		C	1C9L	gi|7245844|pdb|1C9L|A Chain A, Peptide-In-Groove Interactions Link Target Proteins To The B-Propeller Of Clathrin >gi|7245845|pdb|1C9L|B Chain B, Peptide-In-Groove Interactions Link Target Proteins To The B-Propeller Of Clathrin	Library	-1.97	-1.29334	-2.5167	-1.26696	-2.27	-1.2211
ENSG00000141367	ENST00000269122	ENSP00000269122	CLTC	CLTC-001	PRINCIPAL:1	172	A	GCA	TCTGACTGGTATATCTGCAC	chr17	57725022	+	75	78	58	0.102625	3	268	263	5	FALSE	FALSE	6	2	0.333333	-9.336	0.22907		C	1C9L	gi|7245844|pdb|1C9L|A Chain A, Peptide-In-Groove Interactions Link Target Proteins To The B-Propeller Of Clathrin >gi|7245845|pdb|1C9L|B Chain B, Peptide-In-Groove Interactions Link Target Proteins To The B-Propeller Of Clathrin	Library	-1.97	-1.3219	-2.5167	-1.2929	-2.27	-1.25477
ENSG00000141367	ENST00000269122	ENSP00000269122	CLTC	CLTC-001	PRINCIPAL:1	173	Q	CAG								0.103222	3	268			FALSE		6			-9.141	0.277915		C	1C9L	gi|7245844|pdb|1C9L|A Chain A, Peptide-In-Groove Interactions Link Target Proteins To The B-Propeller Of Clathrin >gi|7245845|pdb|1C9L|B Chain B, Peptide-In-Groove Interactions Link Target Proteins To The B-Propeller Of Clathrin	Library		-1.3495		-1.31638		-1.28673
ENSG00000141367	ENST00000269122	ENSP00000269122	CLTC	CLTC-001	PRINCIPAL:1	174	Q	CAA								0.103819	4	161			FALSE		6			-9.141	0.319101		C	1C9L	gi|7245844|pdb|1C9L|A Chain A, Peptide-In-Groove Interactions Link Target Proteins To The B-Propeller Of Clathrin >gi|7245845|pdb|1C9L|B Chain B, Peptide-In-Groove Interactions Link Target Proteins To The B-Propeller Of Clathrin	Library		-1.37499		-1.335		-1.31422
ENSG00000141367	ENST00000269122	ENSP00000269122	CLTC	CLTC-001	PRINCIPAL:1	175	N	AAT	TCCTTTATAGCAAAATCGTG	chr17	57725607	+	76	92	75	0.104415	4	161	6	155	FALSE	FALSE	6	2	0.333333	-10.327	0.306832		C	1C9L	gi|7245844|pdb|1C9L|A Chain A, Peptide-In-Groove Interactions Link Target Proteins To The B-Propeller Of Clathrin >gi|7245845|pdb|1C9L|B Chain B, Peptide-In-Groove Interactions Link Target Proteins To The B-Propeller Of Clathrin	Library	-0.97	-1.39619	-0.174785	-1.34491	-0.08	-1.33256
ENSG00000141367	ENST00000269122	ENSP00000269122	CLTC	CLTC-001	PRINCIPAL:1	176	R	CGT	TTTATAGCAAAATCGTGTGG	chr17	57725610	+	78	84	61	0.105012	4	161	9	152	FALSE	FALSE	6	2	0.333333	-10.419	0.306564		C	1C9L	gi|7245844|pdb|1C9L|A Chain A, Peptide-In-Groove Interactions Link Target Proteins To The B-Propeller Of Clathrin >gi|7245845|pdb|1C9L|B Chain B, Peptide-In-Groove Interactions Link Target Proteins To The B-Propeller Of Clathrin	Library	-1.34	-1.41545	-0.992907	-1.34662	-1.25	-1.34026
ENSG00000141367	ENST00000269122	ENSP00000269122	CLTC	CLTC-001	PRINCIPAL:1	176	R	CGT	TCCTTTATAGCAAAATCGTG	chr17	57725607	+	76	92	75	0.105012	4	161	6	155	FALSE	FALSE	6	2	0.333333	-10.419	0.306564		C	1C9L	gi|7245844|pdb|1C9L|A Chain A, Peptide-In-Groove Interactions Link Target Proteins To The B-Propeller Of Clathrin >gi|7245845|pdb|1C9L|B Chain B, Peptide-In-Groove Interactions Link Target Proteins To The B-Propeller Of Clathrin	Library	-0.97	-1.41545	-0.174785	-1.34662	-0.08	-1.34026
ENSG00000141367	ENST00000269122	ENSP00000269122	CLTC	CLTC-001	PRINCIPAL:1	176	R	CGT	TTATAGCAAAATCGTGTGGT	chr17	57725611	+	80	84	57	0.105012	4	161	10	151	FALSE	FALSE	6	2	0.333333	-10.419	0.306564		C	1C9L	gi|7245844|pdb|1C9L|A Chain A, Peptide-In-Groove Interactions Link Target Proteins To The B-Propeller Of Clathrin >gi|7245845|pdb|1C9L|B Chain B, Peptide-In-Groove Interactions Link Target Proteins To The B-Propeller Of Clathrin	Library	-0.85	-1.41545	-1.15352	-1.34662	-0.43	-1.34026
ENSG00000141367	ENST00000269122	ENSP00000269122	CLTC	CLTC-001	PRINCIPAL:1	177	V	GTG	TTTATAGCAAAATCGTGTGG	chr17	57725610	+	78	84	61	0.105609	4	161	9	152	FALSE	FALSE	6	2	0.333333	-10.428	0.286722		E	1C9L	gi|7245844|pdb|1C9L|A Chain A, Peptide-In-Groove Interactions Link Target Proteins To The B-Propeller Of Clathrin >gi|7245845|pdb|1C9L|B Chain B, Peptide-In-Groove Interactions Link Target Proteins To The B-Propeller Of Clathrin	Library	-1.34	-1.43089	-0.992907	-1.34446	-1.25	-1.34449
ENSG00000141367	ENST00000269122	ENSP00000269122	CLTC	CLTC-001	PRINCIPAL:1	177	V	GTG	TTATAGCAAAATCGTGTGGT	chr17	57725611	+	80	84	57	0.105609	4	161	10	151	FALSE	FALSE	6	2	0.333333	-10.428	0.286722		E	1C9L	gi|7245844|pdb|1C9L|A Chain A, Peptide-In-Groove Interactions Link Target Proteins To The B-Propeller Of Clathrin >gi|7245845|pdb|1C9L|B Chain B, Peptide-In-Groove Interactions Link Target Proteins To The B-Propeller Of Clathrin	Library	-0.85	-1.43089	-1.15352	-1.34446	-0.43	-1.34449
ENSG00000141367	ENST00000269122	ENSP00000269122	CLTC	CLTC-001	PRINCIPAL:1	178	V	GTG								0.106205	4	161			FALSE		6			-10.428	0.243566		C	1C9L	gi|7245844|pdb|1C9L|A Chain A, Peptide-In-Groove Interactions Link Target Proteins To The B-Propeller Of Clathrin >gi|7245845|pdb|1C9L|B Chain B, Peptide-In-Groove Interactions Link Target Proteins To The B-Propeller Of Clathrin	Library		-1.44624		-1.3372		-1.34121
ENSG00000141367	ENST00000269122	ENSP00000269122	CLTC	CLTC-001	PRINCIPAL:1	179	G	GGA								0.106802	4	161			FALSE		6			-12.834	0.222525		E	1C9L	gi|7245844|pdb|1C9L|A Chain A, Peptide-In-Groove Interactions Link Target Proteins To The B-Propeller Of Clathrin >gi|7245845|pdb|1C9L|B Chain B, Peptide-In-Groove Interactions Link Target Proteins To The B-Propeller Of Clathrin	Library		-1.45976		-1.32396		-1.33068
ENSG00000141367	ENST00000269122	ENSP00000269122	CLTC	CLTC-001	PRINCIPAL:1	180	A	GCT								0.107399	4	161			FALSE		6			-10.563	0.222655		E	1C9L	gi|7245844|pdb|1C9L|A Chain A, Peptide-In-Groove Interactions Link Target Proteins To The B-Propeller Of Clathrin >gi|7245845|pdb|1C9L|B Chain B, Peptide-In-Groove Interactions Link Target Proteins To The B-Propeller Of Clathrin	Library		-1.4706		-1.31187		-1.32356
ENSG00000141367	ENST00000269122	ENSP00000269122	CLTC	CLTC-001	PRINCIPAL:1	181	M	ATG								0.107995	4	161			FALSE		6			-11.675	0.195538		E	1C9L	gi|7245844|pdb|1C9L|A Chain A, Peptide-In-Groove Interactions Link Target Proteins To The B-Propeller Of Clathrin >gi|7245845|pdb|1C9L|B Chain B, Peptide-In-Groove Interactions Link Target Proteins To The B-Propeller Of Clathrin	Library		-1.48185		-1.29792		-1.31435
ENSG00000141367	ENST00000269122	ENSP00000269122	CLTC	CLTC-001	PRINCIPAL:1	182	Q	CAG								0.108592	4	161			FALSE		6			-12.064	0.194196		E	1C9L	gi|7245844|pdb|1C9L|A Chain A, Peptide-In-Groove Interactions Link Target Proteins To The B-Propeller Of Clathrin >gi|7245845|pdb|1C9L|B Chain B, Peptide-In-Groove Interactions Link Target Proteins To The B-Propeller Of Clathrin	Library		-1.49447		-1.28229		-1.30307
ENSG00000141367	ENST00000269122	ENSP00000269122	CLTC	CLTC-001	PRINCIPAL:1	183	L	CTA								0.109189	4	161			FALSE		6			-11.388	0.214295		E	1C9L	gi|7245844|pdb|1C9L|A Chain A, Peptide-In-Groove Interactions Link Target Proteins To The B-Propeller Of Clathrin >gi|7245845|pdb|1C9L|B Chain B, Peptide-In-Groove Interactions Link Target Proteins To The B-Propeller Of Clathrin	Library		-1.51021		-1.26543		-1.28982
ENSG00000141367	ENST00000269122	ENSP00000269122	CLTC	CLTC-001	PRINCIPAL:1	184	Y	TAT								0.109785	4	161			FALSE		6			-13.564	0.248875		E	1C9L	gi|7245844|pdb|1C9L|A Chain A, Peptide-In-Groove Interactions Link Target Proteins To The B-Propeller Of Clathrin >gi|7245845|pdb|1C9L|B Chain B, Peptide-In-Groove Interactions Link Target Proteins To The B-Propeller Of Clathrin	Library		-1.53208		-1.24851		-1.27486
ENSG00000141367	ENST00000269122	ENSP00000269122	CLTC	CLTC-001	PRINCIPAL:1	185	S	TCT	TGCAGCTATATTCTGTAGAT	chr17	57725639	+	65	46	59	0.110382	4	161	38	123	FALSE	FALSE	6	2	0.333333	-11.389	0.273165		E	1C9L	gi|7245844|pdb|1C9L|A Chain A, Peptide-In-Groove Interactions Link Target Proteins To The B-Propeller Of Clathrin >gi|7245845|pdb|1C9L|B Chain B, Peptide-In-Groove Interactions Link Target Proteins To The B-Propeller Of Clathrin	Library	-1.41	-1.56285	-1.4951	-1.23394	-2	-1.2587
ENSG00000141367	ENST00000269122	ENSP00000269122	CLTC	CLTC-001	PRINCIPAL:1	186	V	GTA	TGCAGCTATATTCTGTAGAT	chr17	57725639	+	65	46	59	0.110979	4	161	38	123	FALSE	FALSE	6	2	0.333333	-10.824	0.32141		C	1C9L	gi|7245844|pdb|1C9L|A Chain A, Peptide-In-Groove Interactions Link Target Proteins To The B-Propeller Of Clathrin >gi|7245845|pdb|1C9L|B Chain B, Peptide-In-Groove Interactions Link Target Proteins To The B-Propeller Of Clathrin	Library	-1.41	-1.57541	-1.4951	-1.20233	-2	-1.22066
ENSG00000141367	ENST00000269122	ENSP00000269122	CLTC	CLTC-001	PRINCIPAL:1	187	D	GAT								0.111575	4	161			FALSE		6			-11.897	0.366482		C	1C9L	gi|7245844|pdb|1C9L|A Chain A, Peptide-In-Groove Interactions Link Target Proteins To The B-Propeller Of Clathrin >gi|7245845|pdb|1C9L|B Chain B, Peptide-In-Groove Interactions Link Target Proteins To The B-Propeller Of Clathrin	Library		-1.55917		-1.14605		-1.15949
ENSG00000141367	ENST00000269122	ENSP00000269122	CLTC	CLTC-001	PRINCIPAL:1	188	R	AGG								0.112172	4	161			FALSE		6			-12.082	0.404965		C	1C9L	gi|7245844|pdb|1C9L|A Chain A, Peptide-In-Groove Interactions Link Target Proteins To The B-Propeller Of Clathrin >gi|7245845|pdb|1C9L|B Chain B, Peptide-In-Groove Interactions Link Target Proteins To The B-Propeller Of Clathrin	Library		-1.54525		-1.0997		-1.11242
ENSG00000141367	ENST00000269122	ENSP00000269122	CLTC	CLTC-001	PRINCIPAL:1	189	K	AAA								0.112768	4	161			FALSE		6			-11.602	0.435265		C	1C9L	gi|7245844|pdb|1C9L|A Chain A, Peptide-In-Groove Interactions Link Target Proteins To The B-Propeller Of Clathrin >gi|7245845|pdb|1C9L|B Chain B, Peptide-In-Groove Interactions Link Target Proteins To The B-Propeller Of Clathrin	Library		-1.54626		-1.0688		-1.08012
ENSG00000141367	ENST00000269122	ENSP00000269122	CLTC	CLTC-001	PRINCIPAL:1	190	V	GTG								0.113365	4	161			FALSE		6			-11.353	0.496514		C	1C9L	gi|7245844|pdb|1C9L|A Chain A, Peptide-In-Groove Interactions Link Target Proteins To The B-Propeller Of Clathrin >gi|7245845|pdb|1C9L|B Chain B, Peptide-In-Groove Interactions Link Target Proteins To The B-Propeller Of Clathrin	Library		-1.54598		-1.04095		-1.05215
ENSG00000141367	ENST00000269122	ENSP00000269122	CLTC	CLTC-001	PRINCIPAL:1	191	S	TCT								0.113962	4	161			FALSE		6			-11.557	0.524899		C	1C9L	gi|7245844|pdb|1C9L|A Chain A, Peptide-In-Groove Interactions Link Target Proteins To The B-Propeller Of Clathrin >gi|7245845|pdb|1C9L|B Chain B, Peptide-In-Groove Interactions Link Target Proteins To The B-Propeller Of Clathrin	Library		-1.5398		-1.01377		-1.03055
ENSG00000141367	ENST00000269122	ENSP00000269122	CLTC	CLTC-001	PRINCIPAL:1	192	Q	CAG								0.114558	4	161			FALSE		6			-12.349	0.538144		C	1C9L	gi|7245844|pdb|1C9L|A Chain A, Peptide-In-Groove Interactions Link Target Proteins To The B-Propeller Of Clathrin >gi|7245845|pdb|1C9L|B Chain B, Peptide-In-Groove Interactions Link Target Proteins To The B-Propeller Of Clathrin	Library		-1.53785		-0.993105		-1.01762
ENSG00000141367	ENST00000269122	ENSP00000269122	CLTC	CLTC-001	PRINCIPAL:1	193	P	CCC	AAAGTGTCTCAGCCCATTGA	chr17	57725662	+	64	56	67	0.115155	4	161	61	100	FALSE	FALSE	6	2	0.333333	-12.643	0.549306		C	1C9L	gi|7245844|pdb|1C9L|A Chain A, Peptide-In-Groove Interactions Link Target Proteins To The B-Propeller Of Clathrin >gi|7245845|pdb|1C9L|B Chain B, Peptide-In-Groove Interactions Link Target Proteins To The B-Propeller Of Clathrin	Library	-2.6	-1.54007	-1.84052	-0.974489	-2.18	-1.00354
ENSG00000141367	ENST00000269122	ENSP00000269122	CLTC	CLTC-001	PRINCIPAL:1	193	P	CCC	CTAGCTGCATGTCCTTCAAT	chr17	57725663	-	50	53	66	0.115155	4	161	62	99	FALSE	FALSE	6	2	0.333333	-12.643	0.549306		C	1C9L	gi|7245844|pdb|1C9L|A Chain A, Peptide-In-Groove Interactions Link Target Proteins To The B-Propeller Of Clathrin >gi|7245845|pdb|1C9L|B Chain B, Peptide-In-Groove Interactions Link Target Proteins To The B-Propeller Of Clathrin	Library	-1.62	-1.54007	-0.253125	-0.974489	0.2	-1.00354
ENSG00000141367	ENST00000269122	ENSP00000269122	CLTC	CLTC-001	PRINCIPAL:1	194	I	ATT	AAAGTGTCTCAGCCCATTGA	chr17	57725662	+	64	56	67	0.115752	4	161	61	100	FALSE	FALSE	6	2	0.333333	-11.29	0.551225		C	1C9L	gi|7245844|pdb|1C9L|A Chain A, Peptide-In-Groove Interactions Link Target Proteins To The B-Propeller Of Clathrin >gi|7245845|pdb|1C9L|B Chain B, Peptide-In-Groove Interactions Link Target Proteins To The B-Propeller Of Clathrin	Library	-2.6	-1.53989	-1.84052	-0.958983	-2.18	-0.998683
ENSG00000141367	ENST00000269122	ENSP00000269122	CLTC	CLTC-001	PRINCIPAL:1	194	I	ATT	GCTAGCTGCATGTCCTTCAA	chr17	57725664	-	60	35	69	0.115752	4	161	63	98	FALSE	FALSE	6	2	0.333333	-11.29	0.551225		C	1C9L	gi|7245844|pdb|1C9L|A Chain A, Peptide-In-Groove Interactions Link Target Proteins To The B-Propeller Of Clathrin >gi|7245845|pdb|1C9L|B Chain B, Peptide-In-Groove Interactions Link Target Proteins To The B-Propeller Of Clathrin	Library	-1.8	-1.53989	-1.63668	-0.958983	-1.78	-0.998683
ENSG00000141367	ENST00000269122	ENSP00000269122	CLTC	CLTC-001	PRINCIPAL:1	194	I	ATT	CTAGCTGCATGTCCTTCAAT	chr17	57725663	-	50	53	66	0.115752	4	161	62	99	FALSE	FALSE	6	2	0.333333	-11.29	0.551225		C	1C9L	gi|7245844|pdb|1C9L|A Chain A, Peptide-In-Groove Interactions Link Target Proteins To The B-Propeller Of Clathrin >gi|7245845|pdb|1C9L|B Chain B, Peptide-In-Groove Interactions Link Target Proteins To The B-Propeller Of Clathrin	Library	-1.62	-1.53989	-0.253125	-0.958983	0.2	-0.998683
ENSG00000141367	ENST00000269122	ENSP00000269122	CLTC	CLTC-001	PRINCIPAL:1	195	E	GAA	GCTAGCTGCATGTCCTTCAA	chr17	57725664	-	60	35	69	0.116348	4	161	63	98	FALSE	FALSE	6	2	0.333333	-12.382	0.485228		C	1C9L	gi|7245844|pdb|1C9L|A Chain A, Peptide-In-Groove Interactions Link Target Proteins To The B-Propeller Of Clathrin >gi|7245845|pdb|1C9L|B Chain B, Peptide-In-Groove Interactions Link Target Proteins To The B-Propeller Of Clathrin	Library	-1.8	-1.53803	-1.63668	-0.943881	-1.78	-0.994755
ENSG00000141367	ENST00000269122	ENSP00000269122	CLTC	CLTC-001	PRINCIPAL:1	196	G	GGA								0.116945	4	161			FALSE		6			-13.008	0.441318		C	1C9L	gi|7245844|pdb|1C9L|A Chain A, Peptide-In-Groove Interactions Link Target Proteins To The B-Propeller Of Clathrin >gi|7245845|pdb|1C9L|B Chain B, Peptide-In-Groove Interactions Link Target Proteins To The B-Propeller Of Clathrin	Library		-1.53714		-0.927733		-0.985817
ENSG00000141367	ENST00000269122	ENSP00000269122	CLTC	CLTC-001	PRINCIPAL:1	197	H	CAT								0.117542	4	161			FALSE		6			-14.828	0.40563		H	1C9L	gi|7245844|pdb|1C9L|A Chain A, Peptide-In-Groove Interactions Link Target Proteins To The B-Propeller Of Clathrin >gi|7245845|pdb|1C9L|B Chain B, Peptide-In-Groove Interactions Link Target Proteins To The B-Propeller Of Clathrin	Library		-1.53745		-0.910842		-0.975107
ENSG00000141367	ENST00000269122	ENSP00000269122	CLTC	CLTC-001	PRINCIPAL:1	198	A	GCA								0.118138	4	161			FALSE		6			-10.664	0.374315		H	1C9L	gi|7245844|pdb|1C9L|A Chain A, Peptide-In-Groove Interactions Link Target Proteins To The B-Propeller Of Clathrin >gi|7245845|pdb|1C9L|B Chain B, Peptide-In-Groove Interactions Link Target Proteins To The B-Propeller Of Clathrin	Library		-1.53632		-0.894935		-0.968305
ENSG00000141367	ENST00000269122	ENSP00000269122	CLTC	CLTC-001	PRINCIPAL:1	199	A	GCT								0.118735	4	161			FALSE		6			-10.664	0.344358		H	1C9L	gi|7245844|pdb|1C9L|A Chain A, Peptide-In-Groove Interactions Link Target Proteins To The B-Propeller Of Clathrin >gi|7245845|pdb|1C9L|B Chain B, Peptide-In-Groove Interactions Link Target Proteins To The B-Propeller Of Clathrin	Library		-1.53176		-0.881544		-0.965674
ENSG00000141367	ENST00000269122	ENSP00000269122	CLTC	CLTC-001	PRINCIPAL:1	200	S	AGC								0.119332	4	161			FALSE		6			-8.959	0.359811		H	1C9L	gi|7245844|pdb|1C9L|A Chain A, Peptide-In-Groove Interactions Link Target Proteins To The B-Propeller Of Clathrin >gi|7245845|pdb|1C9L|B Chain B, Peptide-In-Groove Interactions Link Target Proteins To The B-Propeller Of Clathrin	Library		-1.52887		-0.867853		-0.962731
ENSG00000141367	ENST00000269122	ENSP00000269122	CLTC	CLTC-001	PRINCIPAL:1	201	F	TTT								0.119928	4	161			FALSE		6			-13.046	0.36527		H	1C9L	gi|7245844|pdb|1C9L|A Chain A, Peptide-In-Groove Interactions Link Target Proteins To The B-Propeller Of Clathrin >gi|7245845|pdb|1C9L|B Chain B, Peptide-In-Groove Interactions Link Target Proteins To The B-Propeller Of Clathrin	Library		-1.52488		-0.856349		-0.962197
ENSG00000141367	ENST00000269122	ENSP00000269122	CLTC	CLTC-001	PRINCIPAL:1	202	A	GCA								0.120525	4	161			FALSE		6			-10.452	0.39028		H	1C9L	gi|7245844|pdb|1C9L|A Chain A, Peptide-In-Groove Interactions Link Target Proteins To The B-Propeller Of Clathrin >gi|7245845|pdb|1C9L|B Chain B, Peptide-In-Groove Interactions Link Target Proteins To The B-Propeller Of Clathrin	Library		-1.51924		-0.847751		-0.963677
ENSG00000141367	ENST00000269122	ENSP00000269122	CLTC	CLTC-001	PRINCIPAL:1	203	Q	CAG								0.121122	4	161			FALSE		6			-9.896	0.431804		E	1C9L	gi|7245844|pdb|1C9L|A Chain A, Peptide-In-Groove Interactions Link Target Proteins To The B-Propeller Of Clathrin >gi|7245845|pdb|1C9L|B Chain B, Peptide-In-Groove Interactions Link Target Proteins To The B-Propeller Of Clathrin	Library		-1.51098		-0.840634		-0.964494
ENSG00000141367	ENST00000269122	ENSP00000269122	CLTC	CLTC-001	PRINCIPAL:1	204	F	TTT	TAGCTTTGCACAGTTTAAGA	chr17	57725694	+	62	59	75	0.121718	4	161	93	68	FALSE	FALSE	6	2	0.333333	-12.241	0.490014		E	1C9L	gi|7245844|pdb|1C9L|A Chain A, Peptide-In-Groove Interactions Link Target Proteins To The B-Propeller Of Clathrin >gi|7245845|pdb|1C9L|B Chain B, Peptide-In-Groove Interactions Link Target Proteins To The B-Propeller Of Clathrin	Library	-0.67	-1.49835	-0.69214	-0.830708	-0.57	-0.959444
ENSG00000141367	ENST00000269122	ENSP00000269122	CLTC	CLTC-001	PRINCIPAL:1	205	K	AAG	TAGCTTTGCACAGTTTAAGA	chr17	57725694	+	62	59	75	0.122315	4	161	93	68	FALSE	FALSE	6	2	0.333333	-11.329	0.538234		E	1C9L	gi|7245844|pdb|1C9L|A Chain A, Peptide-In-Groove Interactions Link Target Proteins To The B-Propeller Of Clathrin >gi|7245845|pdb|1C9L|B Chain B, Peptide-In-Groove Interactions Link Target Proteins To The B-Propeller Of Clathrin	Library	-0.67	-1.4786	-0.69214	-0.814164	-0.57	-0.943852
ENSG00000141367	ENST00000269122	ENSP00000269122	CLTC	CLTC-001	PRINCIPAL:1	205	K	AAG	TTTGCACAGTTTAAGATGGA	chr17	57725698	+	55	56	71	0.122315	4	161	97	64	FALSE	FALSE	6	2	0.333333	-11.329	0.538234		E	1C9L	gi|7245844|pdb|1C9L|A Chain A, Peptide-In-Groove Interactions Link Target Proteins To The B-Propeller Of Clathrin >gi|7245845|pdb|1C9L|B Chain B, Peptide-In-Groove Interactions Link Target Proteins To The B-Propeller Of Clathrin	Library	-1.14	-1.4786	0.0406399	-0.814164	-0.06	-0.943852
ENSG00000141367	ENST00000269122	ENSP00000269122	CLTC	CLTC-001	PRINCIPAL:1	206	M	ATG	TTTGCACAGTTTAAGATGGA	chr17	57725698	+	55	56	71	0.122912	4	161	97	64	FALSE	FALSE	6	2	0.333333	-9.611	0.550925		C	1C9L	gi|7245844|pdb|1C9L|A Chain A, Peptide-In-Groove Interactions Link Target Proteins To The B-Propeller Of Clathrin >gi|7245845|pdb|1C9L|B Chain B, Peptide-In-Groove Interactions Link Target Proteins To The B-Propeller Of Clathrin	Library	-1.14	-1.45359	0.0406399	-0.798522	-0.06	-0.931922
ENSG00000141367	ENST00000269122	ENSP00000269122	CLTC	CLTC-001	PRINCIPAL:1	207	E	GAA								0.123508	4	161			FALSE		6			-11.049	0.563514		C	1C9L	gi|7245844|pdb|1C9L|A Chain A, Peptide-In-Groove Interactions Link Target Proteins To The B-Propeller Of Clathrin >gi|7245845|pdb|1C9L|B Chain B, Peptide-In-Groove Interactions Link Target Proteins To The B-Propeller Of Clathrin	Library		-1.41266		-0.762073		-0.894324
ENSG00000141367	ENST00000269122	ENSP00000269122	CLTC	CLTC-001	PRINCIPAL:1	208	G	GGA								0.124105	4	161			FALSE		6			-11.896	0.544357		C	1C9L	gi|7245844|pdb|1C9L|A Chain A, Peptide-In-Groove Interactions Link Target Proteins To The B-Propeller Of Clathrin >gi|7245845|pdb|1C9L|B Chain B, Peptide-In-Groove Interactions Link Target Proteins To The B-Propeller Of Clathrin	Library		-1.35186		-0.705999		-0.838806
ENSG00000141367	ENST00000269122	ENSP00000269122	CLTC	CLTC-001	PRINCIPAL:1	209	N	AAT								0.124702	4	161			FALSE		6			-12.238	0.492614		C	1C9L	gi|7245844|pdb|1C9L|A Chain A, Peptide-In-Groove Interactions Link Target Proteins To The B-Propeller Of Clathrin >gi|7245845|pdb|1C9L|B Chain B, Peptide-In-Groove Interactions Link Target Proteins To The B-Propeller Of Clathrin	Library		-1.33455		-0.724714		-0.866059
ENSG00000141367	ENST00000269122	ENSP00000269122	CLTC	CLTC-001	PRINCIPAL:1	210	A	GCA								0.125298	4	161			FALSE		6			-9.333	0.464422		C	1C9L	gi|7245844|pdb|1C9L|A Chain A, Peptide-In-Groove Interactions Link Target Proteins To The B-Propeller Of Clathrin >gi|7245845|pdb|1C9L|B Chain B, Peptide-In-Groove Interactions Link Target Proteins To The B-Propeller Of Clathrin	Library		-1.32266		-0.754239		-0.90183
ENSG00000141367	ENST00000269122	ENSP00000269122	CLTC	CLTC-001	PRINCIPAL:1	211	E	GAA								0.125895	4	161			FALSE		6			-7.809	0.413797		C	1C9L	gi|7245844|pdb|1C9L|A Chain A, Peptide-In-Groove Interactions Link Target Proteins To The B-Propeller Of Clathrin >gi|7245845|pdb|1C9L|B Chain B, Peptide-In-Groove Interactions Link Target Proteins To The B-Propeller Of Clathrin	Library		-1.31274		-0.782153		-0.933358
ENSG00000141367	ENST00000269122	ENSP00000269122	CLTC	CLTC-001	PRINCIPAL:1	212	E	GAA								0.126492	4	161			FALSE		6			-7.809	0.352876		C	1C9L	gi|7245844|pdb|1C9L|A Chain A, Peptide-In-Groove Interactions Link Target Proteins To The B-Propeller Of Clathrin >gi|7245845|pdb|1C9L|B Chain B, Peptide-In-Groove Interactions Link Target Proteins To The B-Propeller Of Clathrin	Library		-1.30252		-0.804675		-0.957158
ENSG00000141367	ENST00000269122	ENSP00000269122	CLTC	CLTC-001	PRINCIPAL:1	213	S	TCA								0.127088	4	161			FALSE		6			-10.104	0.304934		C	1C9L	gi|7245844|pdb|1C9L|A Chain A, Peptide-In-Groove Interactions Link Target Proteins To The B-Propeller Of Clathrin >gi|7245845|pdb|1C9L|B Chain B, Peptide-In-Groove Interactions Link Target Proteins To The B-Propeller Of Clathrin	Library		-1.29138		-0.822469		-0.974407
ENSG00000141367	ENST00000269122	ENSP00000269122	CLTC	CLTC-001	PRINCIPAL:1	214	T	ACG								0.127685	4	161			FALSE		6			-11.224	0.253019		E	1C9L	gi|7245844|pdb|1C9L|A Chain A, Peptide-In-Groove Interactions Link Target Proteins To The B-Propeller Of Clathrin >gi|7245845|pdb|1C9L|B Chain B, Peptide-In-Groove Interactions Link Target Proteins To The B-Propeller Of Clathrin	Library		-1.2793		-0.836917		-0.986869
ENSG00000141367	ENST00000269122	ENSP00000269122	CLTC	CLTC-001	PRINCIPAL:1	215	L	TTA								0.128282	4	161			FALSE		6			-11.433	0.217112		E	1C9L	gi|7245844|pdb|1C9L|A Chain A, Peptide-In-Groove Interactions Link Target Proteins To The B-Propeller Of Clathrin >gi|7245845|pdb|1C9L|B Chain B, Peptide-In-Groove Interactions Link Target Proteins To The B-Propeller Of Clathrin	Library		-1.26645		-0.849137		-0.995896
ENSG00000141367	ENST00000269122	ENSP00000269122	CLTC	CLTC-001	PRINCIPAL:1	216	F	TTT								0.128878	4	161			FALSE		6			-13.16	0.189637		E	1C9L	gi|7245844|pdb|1C9L|A Chain A, Peptide-In-Groove Interactions Link Target Proteins To The B-Propeller Of Clathrin >gi|7245845|pdb|1C9L|B Chain B, Peptide-In-Groove Interactions Link Target Proteins To The B-Propeller Of Clathrin	Library		-1.25296		-0.85991		-1.0024
ENSG00000141367	ENST00000269122	ENSP00000269122	CLTC	CLTC-001	PRINCIPAL:1	217	C	TGT								0.129475	4	161			FALSE		6			-14.806	0.185139		E	1C9L	gi|7245844|pdb|1C9L|A Chain A, Peptide-In-Groove Interactions Link Target Proteins To The B-Propeller Of Clathrin >gi|7245845|pdb|1C9L|B Chain B, Peptide-In-Groove Interactions Link Target Proteins To The B-Propeller Of Clathrin	Library		-1.22969		-0.863719		-1.00292
ENSG00000141367	ENST00000269122	ENSP00000269122	CLTC	CLTC-001	PRINCIPAL:1	218	F	TTT	CGTTATTTTGTTTTGCAGTT	chr17	57725738	+	21	5	60	0.130072	4	161	137	24	FALSE	FALSE	6	2	0.333333	-13.046	0.179235		E	1C9L	gi|7245844|pdb|1C9L|A Chain A, Peptide-In-Groove Interactions Link Target Proteins To The B-Propeller Of Clathrin >gi|7245845|pdb|1C9L|B Chain B, Peptide-In-Groove Interactions Link Target Proteins To The B-Propeller Of Clathrin	Library		-1.20185		-0.867022		-1.00504
ENSG00000141367	ENST00000269122	ENSP00000269122	CLTC	CLTC-001	PRINCIPAL:1	219	A	GCA	GTTATTTTGTTTTGCAGTTC	chr17	57725739	+	25	3	57	0.130668	4	161	138	23	FALSE	FALSE	6	2	0.333333	-10.706	0.178775		E	1C9L	gi|7245844|pdb|1C9L|A Chain A, Peptide-In-Groove Interactions Link Target Proteins To The B-Propeller Of Clathrin >gi|7245845|pdb|1C9L|B Chain B, Peptide-In-Groove Interactions Link Target Proteins To The B-Propeller Of Clathrin	Library		-1.18596		-0.879275		-1.01263
ENSG00000141367	ENST00000269122	ENSP00000269122	CLTC	CLTC-001	PRINCIPAL:1	219	A	GCA	TTATTTTGTTTTGCAGTTCG	chr17	57725740	+	36	84	57	0.130668	4	161	139	22	FALSE	FALSE	6	2	0.333333	-10.706	0.178775		E	1C9L	gi|7245844|pdb|1C9L|A Chain A, Peptide-In-Groove Interactions Link Target Proteins To The B-Propeller Of Clathrin >gi|7245845|pdb|1C9L|B Chain B, Peptide-In-Groove Interactions Link Target Proteins To The B-Propeller Of Clathrin	Library		-1.18596		-0.879275		-1.01263
ENSG00000141367	ENST00000269122	ENSP00000269122	CLTC	CLTC-001	PRINCIPAL:1	219	A	GCA	CGTTATTTTGTTTTGCAGTT	chr17	57725738	+	21	5	60	0.130668	4	161	137	24	FALSE	FALSE	6	2	0.333333	-10.706	0.178775		E	1C9L	gi|7245844|pdb|1C9L|A Chain A, Peptide-In-Groove Interactions Link Target Proteins To The B-Propeller Of Clathrin >gi|7245845|pdb|1C9L|B Chain B, Peptide-In-Groove Interactions Link Target Proteins To The B-Propeller Of Clathrin	Library		-1.18596		-0.879275		-1.01263
ENSG00000141367	ENST00000269122	ENSP00000269122	CLTC	CLTC-001	PRINCIPAL:1	220	V	GTT	GTTATTTTGTTTTGCAGTTC	chr17	57725739	+	25	3	57	0.131265	4	161	138	23	FALSE	FALSE	6	2	0.333333	-11.035	0.180669		E	1C9L	gi|7245844|pdb|1C9L|A Chain A, Peptide-In-Groove Interactions Link Target Proteins To The B-Propeller Of Clathrin >gi|7245845|pdb|1C9L|B Chain B, Peptide-In-Groove Interactions Link Target Proteins To The B-Propeller Of Clathrin	Library		-1.1788		-0.899151		-1.02143
ENSG00000141367	ENST00000269122	ENSP00000269122	CLTC	CLTC-001	PRINCIPAL:1	220	V	GTT	TTATTTTGTTTTGCAGTTCG	chr17	57725740	+	36	84	57	0.131265	4	161	139	22	FALSE	FALSE	6	2	0.333333	-11.035	0.180669		E	1C9L	gi|7245844|pdb|1C9L|A Chain A, Peptide-In-Groove Interactions Link Target Proteins To The B-Propeller Of Clathrin >gi|7245845|pdb|1C9L|B Chain B, Peptide-In-Groove Interactions Link Target Proteins To The B-Propeller Of Clathrin	Library		-1.1788		-0.899151		-1.02143
ENSG00000141367	ENST00000269122	ENSP00000269122	CLTC	CLTC-001	PRINCIPAL:1	221	R	CGG								0.131862	4	161			FALSE		6			-11.138	0.202183		E	1C9L	gi|7245844|pdb|1C9L|A Chain A, Peptide-In-Groove Interactions Link Target Proteins To The B-Propeller Of Clathrin >gi|7245845|pdb|1C9L|B Chain B, Peptide-In-Groove Interactions Link Target Proteins To The B-Propeller Of Clathrin	Library		-1.17644		-0.92603		-1.03254
ENSG00000141367	ENST00000269122	ENSP00000269122	CLTC	CLTC-001	PRINCIPAL:1	222	G	GGC	TTTGCAGTTCGGGGCCAAGC	chr17	57725749	+	75	35	62	0.132458	4	161	148	13	FALSE	FALSE	6	2	0.333333	-8.698	0.212031		C	1C9L	gi|7245844|pdb|1C9L|A Chain A, Peptide-In-Groove Interactions Link Target Proteins To The B-Propeller Of Clathrin >gi|7245845|pdb|1C9L|B Chain B, Peptide-In-Groove Interactions Link Target Proteins To The B-Propeller Of Clathrin	Library	-0.87	-1.17628	0.319788	-0.95628	-0.48	-1.04387
ENSG00000141367	ENST00000269122	ENSP00000269122	CLTC	CLTC-001	PRINCIPAL:1	223	Q	CAA	TTTGCAGTTCGGGGCCAAGC	chr17	57725749	+	75	35	62	0.133055	4	161	148	13	FALSE	FALSE	6	2	0.333333	-8.019	0.24214		C	1C9L	gi|7245844|pdb|1C9L|A Chain A, Peptide-In-Groove Interactions Link Target Proteins To The B-Propeller Of Clathrin >gi|7245845|pdb|1C9L|B Chain B, Peptide-In-Groove Interactions Link Target Proteins To The B-Propeller Of Clathrin	Library	-0.87	-1.16872	0.319788	-0.979153	-0.48	-1.05312
ENSG00000141367	ENST00000269122	ENSP00000269122	CLTC	CLTC-001	PRINCIPAL:1	223	Q	CAA	GCAGTTCGGGGCCAAGCTGG	chr17	57725752	+	59	53	59	0.133055	4	161	151	10	FALSE	FALSE	6	2	0.333333	-8.019	0.24214		C	1C9L	gi|7245844|pdb|1C9L|A Chain A, Peptide-In-Groove Interactions Link Target Proteins To The B-Propeller Of Clathrin >gi|7245845|pdb|1C9L|B Chain B, Peptide-In-Groove Interactions Link Target Proteins To The B-Propeller Of Clathrin	Library	-1.08	-1.16872	-0.865524	-0.979153	-1.25	-1.05312
ENSG00000141367	ENST00000269122	ENSP00000269122	CLTC	CLTC-001	PRINCIPAL:1	223	Q	CAA	CAGTTCGGGGCCAAGCTGGA	chr17	57725753	+	70	66	64	0.133055	4	161	152	9	FALSE	FALSE	6	2	0.333333	-8.019	0.24214		C	1C9L	gi|7245844|pdb|1C9L|A Chain A, Peptide-In-Groove Interactions Link Target Proteins To The B-Propeller Of Clathrin >gi|7245845|pdb|1C9L|B Chain B, Peptide-In-Groove Interactions Link Target Proteins To The B-Propeller Of Clathrin	Library	-1.08	-1.16872	-1.60409	-0.979153	-1.51	-1.05312
ENSG00000141367	ENST00000269122	ENSP00000269122	CLTC	CLTC-001	PRINCIPAL:1	223	Q	CAA	AACTTACCTTCCCTCCAGCT	chr17	57725752	-	49	53	59	0.133055	4	161	151	10	FALSE	FALSE	6	2	0.333333	-8.019	0.24214		C	1C9L	gi|7245844|pdb|1C9L|A Chain A, Peptide-In-Groove Interactions Link Target Proteins To The B-Propeller Of Clathrin >gi|7245845|pdb|1C9L|B Chain B, Peptide-In-Groove Interactions Link Target Proteins To The B-Propeller Of Clathrin	Library	-1.44	-1.16872	-1.30304	-0.979153	-1.37	-1.05312
ENSG00000141367	ENST00000269122	ENSP00000269122	CLTC	CLTC-001	PRINCIPAL:1	224	A	GCT	GCAGTTCGGGGCCAAGCTGG	chr17	57725752	+	59	53	59	0.133652	4	161	151	10	FALSE	FALSE	6	2	0.333333	-8.586	0.268698		C	1C9L	gi|7245844|pdb|1C9L|A Chain A, Peptide-In-Groove Interactions Link Target Proteins To The B-Propeller Of Clathrin >gi|7245845|pdb|1C9L|B Chain B, Peptide-In-Groove Interactions Link Target Proteins To The B-Propeller Of Clathrin	Library	-1.08	-1.16636	-0.865524	-1.00737	-1.25	-1.06001
ENSG00000141367	ENST00000269122	ENSP00000269122	CLTC	CLTC-001	PRINCIPAL:1	224	A	GCT	CAGTTCGGGGCCAAGCTGGA	chr17	57725753	+	70	66	64	0.133652	4	161	152	9	FALSE	FALSE	6	2	0.333333	-8.586	0.268698		C	1C9L	gi|7245844|pdb|1C9L|A Chain A, Peptide-In-Groove Interactions Link Target Proteins To The B-Propeller Of Clathrin >gi|7245845|pdb|1C9L|B Chain B, Peptide-In-Groove Interactions Link Target Proteins To The B-Propeller Of Clathrin	Library	-1.08	-1.16636	-1.60409	-1.00737	-1.51	-1.06001
ENSG00000141367	ENST00000269122	ENSP00000269122	CLTC	CLTC-001	PRINCIPAL:1	224	A	GCT	AACTTACCTTCCCTCCAGCT	chr17	57725752	-	49	53	59	0.133652	4	161	151	10	FALSE	FALSE	6	2	0.333333	-8.586	0.268698		C	1C9L	gi|7245844|pdb|1C9L|A Chain A, Peptide-In-Groove Interactions Link Target Proteins To The B-Propeller Of Clathrin >gi|7245845|pdb|1C9L|B Chain B, Peptide-In-Groove Interactions Link Target Proteins To The B-Propeller Of Clathrin	Library	-1.44	-1.16636	-1.30304	-1.00737	-1.37	-1.06001
ENSG00000141367	ENST00000269122	ENSP00000269122	CLTC	CLTC-001	PRINCIPAL:1	225	G	GGA	TCGGGGCCAAGCTGGAGGGA	chr17	57725757	+	32	75	70	0.134248	4	161	156	5	FALSE	FALSE	6	2	0.333333	-10.665	0.286357		C	1C9L	gi|7245844|pdb|1C9L|A Chain A, Peptide-In-Groove Interactions Link Target Proteins To The B-Propeller Of Clathrin >gi|7245845|pdb|1C9L|B Chain B, Peptide-In-Groove Interactions Link Target Proteins To The B-Propeller Of Clathrin	Library	-2.23	-1.15923	-2.19387	-1.03262	-2.09	-1.06177
ENSG00000141367	ENST00000269122	ENSP00000269122	CLTC	CLTC-001	PRINCIPAL:1	226	G	GGG	TCGGGGCCAAGCTGGAGGGA	chr17	57725757	+	32	75	70	0.134845	4	161	156	5	FALSE	FALSE	6	2	0.333333	-10.665	0.299506		C	1C9L	gi|7245844|pdb|1C9L|A Chain A, Peptide-In-Groove Interactions Link Target Proteins To The B-Propeller Of Clathrin >gi|7245845|pdb|1C9L|B Chain B, Peptide-In-Groove Interactions Link Target Proteins To The B-Propeller Of Clathrin	Library	-2.23	-1.14603	-2.19387	-1.05318	-2.09	-1.05758
ENSG00000141367	ENST00000269122	ENSP00000269122	CLTC	CLTC-001	PRINCIPAL:1	227	K	AAG								0.135442	4	161			FALSE		6			-11.428	0.309234		E	1C9L	gi|7245844|pdb|1C9L|A Chain A, Peptide-In-Groove Interactions Link Target Proteins To The B-Propeller Of Clathrin >gi|7245845|pdb|1C9L|B Chain B, Peptide-In-Groove Interactions Link Target Proteins To The B-Propeller Of Clathrin	Library		-1.12745		-1.06784		-1.0484
ENSG00000141367	ENST00000269122	ENSP00000269122	CLTC	CLTC-001	PRINCIPAL:1	228	L	TTA								0.136038	5	113			FALSE		6			-10.749	0.306214		E	1C9L	gi|7245844|pdb|1C9L|A Chain A, Peptide-In-Groove Interactions Link Target Proteins To The B-Propeller Of Clathrin >gi|7245845|pdb|1C9L|B Chain B, Peptide-In-Groove Interactions Link Target Proteins To The B-Propeller Of Clathrin	Library		-1.1074		-1.0777		-1.0417
ENSG00000141367	ENST00000269122	ENSP00000269122	CLTC	CLTC-001	PRINCIPAL:1	229	H	CAT								0.136635	5	113			FALSE		6			-14.218	0.30352		E	1C9L	gi|7245844|pdb|1C9L|A Chain A, Peptide-In-Groove Interactions Link Target Proteins To The B-Propeller Of Clathrin >gi|7245845|pdb|1C9L|B Chain B, Peptide-In-Groove Interactions Link Target Proteins To The B-Propeller Of Clathrin	Library		-1.0899		-1.08768		-1.04055
ENSG00000141367	ENST00000269122	ENSP00000269122	CLTC	CLTC-001	PRINCIPAL:1	230	I	ATT								0.137232	5	113			FALSE		6			-10.476	0.3112		E	1C9L	gi|7245844|pdb|1C9L|A Chain A, Peptide-In-Groove Interactions Link Target Proteins To The B-Propeller Of Clathrin >gi|7245845|pdb|1C9L|B Chain B, Peptide-In-Groove Interactions Link Target Proteins To The B-Propeller Of Clathrin	Library		-1.07352		-1.09858		-1.03902
ENSG00000141367	ENST00000269122	ENSP00000269122	CLTC	CLTC-001	PRINCIPAL:1	231	I	ATT	CAGTTACATATTATTGAAGT	chr17	57728577	+	56	30	55	0.137828	5	113	13	100	FALSE	FALSE	6	2	0.333333	-10.476	0.327783		E	1C9L	gi|7245844|pdb|1C9L|A Chain A, Peptide-In-Groove Interactions Link Target Proteins To The B-Propeller Of Clathrin >gi|7245845|pdb|1C9L|B Chain B, Peptide-In-Groove Interactions Link Target Proteins To The B-Propeller Of Clathrin	Library	0.23	-1.0584	-0.0259961	-1.11029	0.75	-1.03655
ENSG00000141367	ENST00000269122	ENSP00000269122	CLTC	CLTC-001	PRINCIPAL:1	232	E	GAA	CAGTTACATATTATTGAAGT	chr17	57728577	+	56	30	55	0.138425	5	113	13	100	FALSE	FALSE	6	2	0.333333	-10.923	0.347584		E	1C9L	gi|7245844|pdb|1C9L|A Chain A, Peptide-In-Groove Interactions Link Target Proteins To The B-Propeller Of Clathrin >gi|7245845|pdb|1C9L|B Chain B, Peptide-In-Groove Interactions Link Target Proteins To The B-Propeller Of Clathrin	Library	0.23	-1.04451	-0.0259961	-1.12286	0.75	-1.03273
ENSG00000141367	ENST00000269122	ENSP00000269122	CLTC	CLTC-001	PRINCIPAL:1	233	V	GTT								0.139021	5	113			FALSE		6			-9.687	0.378871		E	1C9L	gi|7245844|pdb|1C9L|A Chain A, Peptide-In-Groove Interactions Link Target Proteins To The B-Propeller Of Clathrin >gi|7245845|pdb|1C9L|B Chain B, Peptide-In-Groove Interactions Link Target Proteins To The B-Propeller Of Clathrin	Library		-1.01104		-1.11728		-1.006
ENSG00000141367	ENST00000269122	ENSP00000269122	CLTC	CLTC-001	PRINCIPAL:1	234	G	GGC								0.139618	5	113			FALSE		6			-10.801	0.413691		C	1C9L	gi|7245844|pdb|1C9L|A Chain A, Peptide-In-Groove Interactions Link Target Proteins To The B-Propeller Of Clathrin >gi|7245845|pdb|1C9L|B Chain B, Peptide-In-Groove Interactions Link Target Proteins To The B-Propeller Of Clathrin	Library		-0.973309		-1.10544		-0.975219
ENSG00000141367	ENST00000269122	ENSP00000269122	CLTC	CLTC-001	PRINCIPAL:1	235	T	ACA								0.140215	5	113			FALSE		6			-6.712	0.434361		C	1C9L	gi|7245844|pdb|1C9L|A Chain A, Peptide-In-Groove Interactions Link Target Proteins To The B-Propeller Of Clathrin >gi|7245845|pdb|1C9L|B Chain B, Peptide-In-Groove Interactions Link Target Proteins To The B-Propeller Of Clathrin	Library		-0.945248		-1.10209		-0.954718
ENSG00000141367	ENST00000269122	ENSP00000269122	CLTC	CLTC-001	PRINCIPAL:1	236	P	CCA	AAGTTGGCACACCACCTACA	chr17	57728593	+	83	92	66	0.140811	5	113	29	84	FALSE	FALSE	6	2	0.333333	-7.047	0.476618		C	1C9L	gi|7245844|pdb|1C9L|A Chain A, Peptide-In-Groove Interactions Link Target Proteins To The B-Propeller Of Clathrin >gi|7245845|pdb|1C9L|B Chain B, Peptide-In-Groove Interactions Link Target Proteins To The B-Propeller Of Clathrin	Library	-1.42	-0.927403	-1.78111	-1.11114	-1.45	-0.943689
ENSG00000141367	ENST00000269122	ENSP00000269122	CLTC	CLTC-001	PRINCIPAL:1	236	P	CCA	AAGGGCTGGTTCCCTGTAGG	chr17	57728593	-	56	72	55	0.140811	5	113	29	84	FALSE	FALSE	6	2	0.333333	-7.047	0.476618		C	1C9L	gi|7245844|pdb|1C9L|A Chain A, Peptide-In-Groove Interactions Link Target Proteins To The B-Propeller Of Clathrin >gi|7245845|pdb|1C9L|B Chain B, Peptide-In-Groove Interactions Link Target Proteins To The B-Propeller Of Clathrin	Library		-0.927403		-1.11114		-0.943689
ENSG00000141367	ENST00000269122	ENSP00000269122	CLTC	CLTC-001	PRINCIPAL:1	236	P	CCA	GAAGTTGGCACACCACCTAC	chr17	57728592	+	84	50	66	0.140811	5	113	28	85	FALSE	FALSE	6	2	0.333333	-7.047	0.476618		C	1C9L	gi|7245844|pdb|1C9L|A Chain A, Peptide-In-Groove Interactions Link Target Proteins To The B-Propeller Of Clathrin >gi|7245845|pdb|1C9L|B Chain B, Peptide-In-Groove Interactions Link Target Proteins To The B-Propeller Of Clathrin	Library		-0.927403		-1.11114		-0.943689
ENSG00000141367	ENST00000269122	ENSP00000269122	CLTC	CLTC-001	PRINCIPAL:1	237	P	CCT	GGAAAGGGCTGGTTCCCTGT	chr17	57728596	-	50	56	63	0.141408	5	113	32	81	FALSE	FALSE	6	2	0.333333	-7.047	0.51816		C	1C9L	gi|7245844|pdb|1C9L|A Chain A, Peptide-In-Groove Interactions Link Target Proteins To The B-Propeller Of Clathrin >gi|7245845|pdb|1C9L|B Chain B, Peptide-In-Groove Interactions Link Target Proteins To The B-Propeller Of Clathrin	Library	-1.39	-0.906874	-1.69388	-1.11945	-2.11	-0.92861
ENSG00000141367	ENST00000269122	ENSP00000269122	CLTC	CLTC-001	PRINCIPAL:1	237	P	CCT	GAAGTTGGCACACCACCTAC	chr17	57728592	+	84	50	66	0.141408	5	113	28	85	FALSE	FALSE	6	2	0.333333	-7.047	0.51816		C	1C9L	gi|7245844|pdb|1C9L|A Chain A, Peptide-In-Groove Interactions Link Target Proteins To The B-Propeller Of Clathrin >gi|7245845|pdb|1C9L|B Chain B, Peptide-In-Groove Interactions Link Target Proteins To The B-Propeller Of Clathrin	Library		-0.906874		-1.11945		-0.92861
ENSG00000141367	ENST00000269122	ENSP00000269122	CLTC	CLTC-001	PRINCIPAL:1	237	P	CCT	AAGTTGGCACACCACCTACA	chr17	57728593	+	83	92	66	0.141408	5	113	29	84	FALSE	FALSE	6	2	0.333333	-7.047	0.51816		C	1C9L	gi|7245844|pdb|1C9L|A Chain A, Peptide-In-Groove Interactions Link Target Proteins To The B-Propeller Of Clathrin >gi|7245845|pdb|1C9L|B Chain B, Peptide-In-Groove Interactions Link Target Proteins To The B-Propeller Of Clathrin	Library	-1.42	-0.906874	-1.78111	-1.11945	-1.45	-0.92861
ENSG00000141367	ENST00000269122	ENSP00000269122	CLTC	CLTC-001	PRINCIPAL:1	237	P	CCT	AAGGGCTGGTTCCCTGTAGG	chr17	57728593	-	56	72	55	0.141408	5	113	29	84	FALSE	FALSE	6	2	0.333333	-7.047	0.51816		C	1C9L	gi|7245844|pdb|1C9L|A Chain A, Peptide-In-Groove Interactions Link Target Proteins To The B-Propeller Of Clathrin >gi|7245845|pdb|1C9L|B Chain B, Peptide-In-Groove Interactions Link Target Proteins To The B-Propeller Of Clathrin	Library		-0.906874		-1.11945		-0.92861
ENSG00000141367	ENST00000269122	ENSP00000269122	CLTC	CLTC-001	PRINCIPAL:1	238	T	ACA	GGAAAGGGCTGGTTCCCTGT	chr17	57728596	-	50	56	63	0.142005	5	113	32	81	FALSE	FALSE	6	2	0.333333	-6.778	0.544964		C	1C9L	gi|7245844|pdb|1C9L|A Chain A, Peptide-In-Groove Interactions Link Target Proteins To The B-Propeller Of Clathrin >gi|7245845|pdb|1C9L|B Chain B, Peptide-In-Groove Interactions Link Target Proteins To The B-Propeller Of Clathrin	Library	-1.39	-0.879553	-1.69388	-1.12127	-2.11	-0.905421
ENSG00000141367	ENST00000269122	ENSP00000269122	CLTC	CLTC-001	PRINCIPAL:1	239	G	GGG								0.142601	5	113			FALSE		6			-10.469	0.56539		C	1C9L	gi|7245844|pdb|1C9L|A Chain A, Peptide-In-Groove Interactions Link Target Proteins To The B-Propeller Of Clathrin >gi|7245845|pdb|1C9L|B Chain B, Peptide-In-Groove Interactions Link Target Proteins To The B-Propeller Of Clathrin	Library		-0.839149		-1.10486		-0.86963
ENSG00000141367	ENST00000269122	ENSP00000269122	CLTC	CLTC-001	PRINCIPAL:1	240	N	AAC								0.143198	5	113			FALSE		6			-11.206	0.594788		C	1C9L	gi|7245844|pdb|1C9L|A Chain A, Peptide-In-Groove Interactions Link Target Proteins To The B-Propeller Of Clathrin >gi|7245845|pdb|1C9L|B Chain B, Peptide-In-Groove Interactions Link Target Proteins To The B-Propeller Of Clathrin	Library		-0.795626		-1.08399		-0.830263
ENSG00000141367	ENST00000269122	ENSP00000269122	CLTC	CLTC-001	PRINCIPAL:1	241	Q	CAG	CTGCCTTCTTTGGAAAGGGC	chr17	57728607	-	31	25	65	0.143795	5	113	43	70	FALSE	FALSE	6	2	0.333333	-10.469	0.591689		C	1C9L	gi|7245844|pdb|1C9L|A Chain A, Peptide-In-Groove Interactions Link Target Proteins To The B-Propeller Of Clathrin >gi|7245845|pdb|1C9L|B Chain B, Peptide-In-Groove Interactions Link Target Proteins To The B-Propeller Of Clathrin	Library		-0.745311		-1.05156		-0.78733
ENSG00000141367	ENST00000269122	ENSP00000269122	CLTC	CLTC-001	PRINCIPAL:1	242	P	CCC	CTGCCTTCTTTGGAAAGGGC	chr17	57728607	-	31	25	65	0.144391	5	113	43	70	FALSE	FALSE	6	2	0.333333	-12.345	0.586419		C	1C9L	gi|7245844|pdb|1C9L|A Chain A, Peptide-In-Groove Interactions Link Target Proteins To The B-Propeller Of Clathrin >gi|7245845|pdb|1C9L|B Chain B, Peptide-In-Groove Interactions Link Target Proteins To The B-Propeller Of Clathrin	Library		-0.69434		-1.01777		-0.745453
ENSG00000141367	ENST00000269122	ENSP00000269122	CLTC	CLTC-001	PRINCIPAL:1	242	P	CCC	TCCACTGCCTTCTTTGGAAA	chr17	57728611	-	38	35	54	0.144391	5	113	47	66	FALSE	FALSE	6	2	0.333333	-12.345	0.586419		C	1C9L	gi|7245844|pdb|1C9L|A Chain A, Peptide-In-Groove Interactions Link Target Proteins To The B-Propeller Of Clathrin >gi|7245845|pdb|1C9L|B Chain B, Peptide-In-Groove Interactions Link Target Proteins To The B-Propeller Of Clathrin	Library	-0.51	-0.69434	-0.618339	-1.01777	0.16	-0.745453
ENSG00000141367	ENST00000269122	ENSP00000269122	CLTC	CLTC-001	PRINCIPAL:1	243	F	TTT	TCCACTGCCTTCTTTGGAAA	chr17	57728611	-	38	35	54	0.144988	5	113	47	66	FALSE	FALSE	6	2	0.333333	-12.101	0.56309		C	1C9L	gi|7245844|pdb|1C9L|A Chain A, Peptide-In-Groove Interactions Link Target Proteins To The B-Propeller Of Clathrin >gi|7245845|pdb|1C9L|B Chain B, Peptide-In-Groove Interactions Link Target Proteins To The B-Propeller Of Clathrin	Library	-0.51	-0.645388	-0.618339	-0.985756	0.16	-0.707486
ENSG00000141367	ENST00000269122	ENSP00000269122	CLTC	CLTC-001	PRINCIPAL:1	243	F	TTT	ATCCACTGCCTTCTTTGGAA	chr17	57728612	-	53	56	52	0.144988	5	113	48	65	FALSE	FALSE	6	2	0.333333	-12.101	0.56309		C	1C9L	gi|7245844|pdb|1C9L|A Chain A, Peptide-In-Groove Interactions Link Target Proteins To The B-Propeller Of Clathrin >gi|7245845|pdb|1C9L|B Chain B, Peptide-In-Groove Interactions Link Target Proteins To The B-Propeller Of Clathrin	Library	-1.24	-0.645388	-0.97567	-0.985756	-1.62	-0.707486
ENSG00000141367	ENST00000269122	ENSP00000269122	CLTC	CLTC-001	PRINCIPAL:1	244	P	CCA	GAACCAGCCCTTTCCAAAGA	chr17	57728615	+	47	69	59	0.145585	5	113	51	62	FALSE	FALSE	6	2	0.333333	-8.218	0.530332		C	1C9L	gi|7245844|pdb|1C9L|A Chain A, Peptide-In-Groove Interactions Link Target Proteins To The B-Propeller Of Clathrin >gi|7245845|pdb|1C9L|B Chain B, Peptide-In-Groove Interactions Link Target Proteins To The B-Propeller Of Clathrin	Library	-1.07	-0.597756	-1.62	-0.957555	-1.09	-0.666198
ENSG00000141367	ENST00000269122	ENSP00000269122	CLTC	CLTC-001	PRINCIPAL:1	244	P	CCA	AAGACATCCACTGCCTTCTT	chr17	57728617	-	50	4	48	0.145585	5	113	53	60	FALSE	FALSE	6	2	0.333333	-8.218	0.530332		C	1C9L	gi|7245844|pdb|1C9L|A Chain A, Peptide-In-Groove Interactions Link Target Proteins To The B-Propeller Of Clathrin >gi|7245845|pdb|1C9L|B Chain B, Peptide-In-Groove Interactions Link Target Proteins To The B-Propeller Of Clathrin	Library	0.21	-0.597756	-0.632519	-0.957555	0.39	-0.666198
ENSG00000141367	ENST00000269122	ENSP00000269122	CLTC	CLTC-001	PRINCIPAL:1	244	P	CCA	ATCCACTGCCTTCTTTGGAA	chr17	57728612	-	53	56	52	0.145585	5	113	48	65	FALSE	FALSE	6	2	0.333333	-8.218	0.530332		C	1C9L	gi|7245844|pdb|1C9L|A Chain A, Peptide-In-Groove Interactions Link Target Proteins To The B-Propeller Of Clathrin >gi|7245845|pdb|1C9L|B Chain B, Peptide-In-Groove Interactions Link Target Proteins To The B-Propeller Of Clathrin	Library	-1.24	-0.597756	-0.97567	-0.957555	-1.62	-0.666198
ENSG00000141367	ENST00000269122	ENSP00000269122	CLTC	CLTC-001	PRINCIPAL:1	245	K	AAG	AAGACATCCACTGCCTTCTT	chr17	57728617	-	50	4	48	0.146181	5	113	53	60	FALSE	FALSE	6	2	0.333333	-11.265	0.486627		C	1C9L	gi|7245844|pdb|1C9L|A Chain A, Peptide-In-Groove Interactions Link Target Proteins To The B-Propeller Of Clathrin >gi|7245845|pdb|1C9L|B Chain B, Peptide-In-Groove Interactions Link Target Proteins To The B-Propeller Of Clathrin	Library	0.21	-0.543688	-0.632519	-0.925978	0.39	-0.611736
ENSG00000141367	ENST00000269122	ENSP00000269122	CLTC	CLTC-001	PRINCIPAL:1	245	K	AAG	GAACCAGCCCTTTCCAAAGA	chr17	57728615	+	47	69	59	0.146181	5	113	51	62	FALSE	FALSE	6	2	0.333333	-11.265	0.486627		C	1C9L	gi|7245844|pdb|1C9L|A Chain A, Peptide-In-Groove Interactions Link Target Proteins To The B-Propeller Of Clathrin >gi|7245845|pdb|1C9L|B Chain B, Peptide-In-Groove Interactions Link Target Proteins To The B-Propeller Of Clathrin	Library	-1.07	-0.543688	-1.62	-0.925978	-1.09	-0.611736
ENSG00000141367	ENST00000269122	ENSP00000269122	CLTC	CLTC-001	PRINCIPAL:1	246	K	AAG	GCCCTTTCCAAAGAAGGCAG	chr17	57728621	+	45	72	55	0.146778	5	113	57	56	FALSE	FALSE	6	2	0.333333	-11.265	0.438851		C	1C9L	gi|7245844|pdb|1C9L|A Chain A, Peptide-In-Groove Interactions Link Target Proteins To The B-Propeller Of Clathrin >gi|7245845|pdb|1C9L|B Chain B, Peptide-In-Groove Interactions Link Target Proteins To The B-Propeller Of Clathrin	Library		-0.485217		-0.88912		-0.551882
ENSG00000141367	ENST00000269122	ENSP00000269122	CLTC	CLTC-001	PRINCIPAL:1	247	A	GCA	GCCCTTTCCAAAGAAGGCAG	chr17	57728621	+	45	72	55	0.147375	5	113	57	56	FALSE	FALSE	6	2	0.333333	-9.976	0.396466		E	1C9L	gi|7245844|pdb|1C9L|A Chain A, Peptide-In-Groove Interactions Link Target Proteins To The B-Propeller Of Clathrin >gi|7245845|pdb|1C9L|B Chain B, Peptide-In-Groove Interactions Link Target Proteins To The B-Propeller Of Clathrin	Library		-0.428528		-0.850539		-0.494264
ENSG00000141367	ENST00000269122	ENSP00000269122	CLTC	CLTC-001	PRINCIPAL:1	248	V	GTG								0.147971	5	113			FALSE		6			-10.206	0.37178		E	1C9L	gi|7245844|pdb|1C9L|A Chain A, Peptide-In-Groove Interactions Link Target Proteins To The B-Propeller Of Clathrin >gi|7245845|pdb|1C9L|B Chain B, Peptide-In-Groove Interactions Link Target Proteins To The B-Propeller Of Clathrin	Library		-0.382411		-0.816221		-0.449709
ENSG00000141367	ENST00000269122	ENSP00000269122	CLTC	CLTC-001	PRINCIPAL:1	249	D	GAT								0.148568	5	113			FALSE		6			-12.356	0.327498		E	1C9L	gi|7245844|pdb|1C9L|A Chain A, Peptide-In-Groove Interactions Link Target Proteins To The B-Propeller Of Clathrin >gi|7245845|pdb|1C9L|B Chain B, Peptide-In-Groove Interactions Link Target Proteins To The B-Propeller Of Clathrin	Library		-0.342651		-0.784588		-0.420269
ENSG00000141367	ENST00000269122	ENSP00000269122	CLTC	CLTC-001	PRINCIPAL:1	250	V	GTC								0.149165	5	113			FALSE		6			-10.769	0.305488		E	1C9L	gi|7245844|pdb|1C9L|A Chain A, Peptide-In-Groove Interactions Link Target Proteins To The B-Propeller Of Clathrin >gi|7245845|pdb|1C9L|B Chain B, Peptide-In-Groove Interactions Link Target Proteins To The B-Propeller Of Clathrin	Library		-0.305905		-0.753773		-0.398957
ENSG00000141367	ENST00000269122	ENSP00000269122	CLTC	CLTC-001	PRINCIPAL:1	251	F	TTC								0.149761	5	113			FALSE		6			-12.054	0.286507		E	1C9L	gi|7245844|pdb|1C9L|A Chain A, Peptide-In-Groove Interactions Link Target Proteins To The B-Propeller Of Clathrin >gi|7245845|pdb|1C9L|B Chain B, Peptide-In-Groove Interactions Link Target Proteins To The B-Propeller Of Clathrin	Library		-0.278258		-0.727953		-0.381195
ENSG00000141367	ENST00000269122	ENSP00000269122	CLTC	CLTC-001	PRINCIPAL:1	252	F	TTT								0.150358	5	113			FALSE		6			-12.054	0.295794		C	1C9L	gi|7245844|pdb|1C9L|A Chain A, Peptide-In-Groove Interactions Link Target Proteins To The B-Propeller Of Clathrin >gi|7245845|pdb|1C9L|B Chain B, Peptide-In-Groove Interactions Link Target Proteins To The B-Propeller Of Clathrin	Library		-0.258569		-0.704646		-0.372578
ENSG00000141367	ENST00000269122	ENSP00000269122	CLTC	CLTC-001	PRINCIPAL:1	253	P	CCT	AAATCATTTTGTGCTTCTGG	chr17	57728644	-	47	75	44	0.150955	5	113	80	33	FALSE	FALSE	6	2	0.333333	-11.748	0.329069		C	1C9L	gi|7245844|pdb|1C9L|A Chain A, Peptide-In-Groove Interactions Link Target Proteins To The B-Propeller Of Clathrin >gi|7245845|pdb|1C9L|B Chain B, Peptide-In-Groove Interactions Link Target Proteins To The B-Propeller Of Clathrin	Library		-0.251313		-0.686981		-0.371128
ENSG00000141367	ENST00000269122	ENSP00000269122	CLTC	CLTC-001	PRINCIPAL:1	254	P	CCA	AAATCATTTTGTGCTTCTGG	chr17	57728644	-	47	75	44	0.151551	5	113	80	33	FALSE	FALSE	6	2	0.333333	-11.748	0.357608		C	1C9L	gi|7245844|pdb|1C9L|A Chain A, Peptide-In-Groove Interactions Link Target Proteins To The B-Propeller Of Clathrin >gi|7245845|pdb|1C9L|B Chain B, Peptide-In-Groove Interactions Link Target Proteins To The B-Propeller Of Clathrin	Library		-0.256329		-0.675659		-0.376014
ENSG00000141367	ENST00000269122	ENSP00000269122	CLTC	CLTC-001	PRINCIPAL:1	254	P	CCA	GGAAAATCATTTTGTGCTTC	chr17	57728647	-	45	2	48	0.151551	5	113	83	30	FALSE	FALSE	6	2	0.333333	-11.748	0.357608		C	1C9L	gi|7245844|pdb|1C9L|A Chain A, Peptide-In-Groove Interactions Link Target Proteins To The B-Propeller Of Clathrin >gi|7245845|pdb|1C9L|B Chain B, Peptide-In-Groove Interactions Link Target Proteins To The B-Propeller Of Clathrin	Library		-0.256329		-0.675659		-0.376014
ENSG00000141367	ENST00000269122	ENSP00000269122	CLTC	CLTC-001	PRINCIPAL:1	255	E	GAA	GGAAAATCATTTTGTGCTTC	chr17	57728647	-	45	2	48	0.152148	5	113	83	30	FALSE	FALSE	6	2	0.333333	-11.404	0.381919		C	1C9L	gi|7245844|pdb|1C9L|A Chain A, Peptide-In-Groove Interactions Link Target Proteins To The B-Propeller Of Clathrin >gi|7245845|pdb|1C9L|B Chain B, Peptide-In-Groove Interactions Link Target Proteins To The B-Propeller Of Clathrin	Library		-0.270954		-0.670251		-0.385624
ENSG00000141367	ENST00000269122	ENSP00000269122	CLTC	CLTC-001	PRINCIPAL:1	256	A	GCA								0.152745	5	113			FALSE		6			-10.162	0.412749		H	1C9L	gi|7245844|pdb|1C9L|A Chain A, Peptide-In-Groove Interactions Link Target Proteins To The B-Propeller Of Clathrin >gi|7245845|pdb|1C9L|B Chain B, Peptide-In-Groove Interactions Link Target Proteins To The B-Propeller Of Clathrin	Library		-0.292086		-0.669734		-0.398412
ENSG00000141367	ENST00000269122	ENSP00000269122	CLTC	CLTC-001	PRINCIPAL:1	257	Q	CAA								0.153341	5	113			FALSE		6			-10.15	0.411429		C	1C9L	gi|7245844|pdb|1C9L|A Chain A, Peptide-In-Groove Interactions Link Target Proteins To The B-Propeller Of Clathrin >gi|7245845|pdb|1C9L|B Chain B, Peptide-In-Groove Interactions Link Target Proteins To The B-Propeller Of Clathrin	Library		-0.301918		-0.663507		-0.404329
ENSG00000141367	ENST00000269122	ENSP00000269122	CLTC	CLTC-001	PRINCIPAL:1	258	N	AAT								0.153938	5	113			FALSE		6			-9.187	0.409866		C	1C9L	gi|7245844|pdb|1C9L|A Chain A, Peptide-In-Groove Interactions Link Target Proteins To The B-Propeller Of Clathrin >gi|7245845|pdb|1C9L|B Chain B, Peptide-In-Groove Interactions Link Target Proteins To The B-Propeller Of Clathrin	Library		-0.314434		-0.658599		-0.412107
ENSG00000141367	ENST00000269122	ENSP00000269122	CLTC	CLTC-001	PRINCIPAL:1	259	D	GAT								0.154535	5	113			FALSE		6			-11.915	0.392128		C	1C9L	gi|7245844|pdb|1C9L|A Chain A, Peptide-In-Groove Interactions Link Target Proteins To The B-Propeller Of Clathrin >gi|7245845|pdb|1C9L|B Chain B, Peptide-In-Groove Interactions Link Target Proteins To The B-Propeller Of Clathrin	Library		-0.311177		-0.640915		-0.41084
ENSG00000141367	ENST00000269122	ENSP00000269122	CLTC	CLTC-001	PRINCIPAL:1	260	F	TTT								0.155131	5	113			FALSE		6			-12.575	0.366107		C	1C9L	gi|7245844|pdb|1C9L|A Chain A, Peptide-In-Groove Interactions Link Target Proteins To The B-Propeller Of Clathrin >gi|7245845|pdb|1C9L|B Chain B, Peptide-In-Groove Interactions Link Target Proteins To The B-Propeller Of Clathrin	Library		-0.306528		-0.618506		-0.408691
ENSG00000141367	ENST00000269122	ENSP00000269122	CLTC	CLTC-001	PRINCIPAL:1	261	P	CCT	TAAAATACCTGCATTGCAAC	chr17	57728668	-	65	30	60	0.155728	5	113	104	9	FALSE	FALSE	6	2	0.333333	-13.404	0.333582		C	1C9L	gi|7245844|pdb|1C9L|A Chain A, Peptide-In-Groove Interactions Link Target Proteins To The B-Propeller Of Clathrin >gi|7245845|pdb|1C9L|B Chain B, Peptide-In-Groove Interactions Link Target Proteins To The B-Propeller Of Clathrin	Library	0.88	-0.299351	0.318614	-0.589497	0.53	-0.404766
ENSG00000141367	ENST00000269122	ENSP00000269122	CLTC	CLTC-001	PRINCIPAL:1	262	V	GTT	TAAAATACCTGCATTGCAAC	chr17	57728668	-	65	30	60	0.156325	5	113	104	9	FALSE	FALSE	6	2	0.333333	-10.918	0.328343		E	1C9L	gi|7245844|pdb|1C9L|A Chain A, Peptide-In-Groove Interactions Link Target Proteins To The B-Propeller Of Clathrin >gi|7245845|pdb|1C9L|B Chain B, Peptide-In-Groove Interactions Link Target Proteins To The B-Propeller Of Clathrin	Library	0.88	-0.288432	0.318614	-0.551808	0.53	-0.398061
ENSG00000141367	ENST00000269122	ENSP00000269122	CLTC	CLTC-001	PRINCIPAL:1	263	A	GCA	TGATTTTCCTGTTGCAATGC	chr17	57728672	+	62	30	64	0.156921	5	113	108	5	FALSE	FALSE	6	2	0.333333	-10.811	0.321658		E	1C9L	gi|7245844|pdb|1C9L|A Chain A, Peptide-In-Groove Interactions Link Target Proteins To The B-Propeller Of Clathrin >gi|7245845|pdb|1C9L|B Chain B, Peptide-In-Groove Interactions Link Target Proteins To The B-Propeller Of Clathrin	Library		-0.273408		-0.504599		-0.388119
ENSG00000141367	ENST00000269122	ENSP00000269122	CLTC	CLTC-001	PRINCIPAL:1	264	M	ATG	TGATTTTCCTGTTGCAATGC	chr17	57728672	+	62	30	64	0.157518	5	113	108	5	FALSE	FALSE	6	2	0.333333	-11.624	0.310722		E	1C9L	gi|7245844|pdb|1C9L|A Chain A, Peptide-In-Groove Interactions Link Target Proteins To The B-Propeller Of Clathrin >gi|7245845|pdb|1C9L|B Chain B, Peptide-In-Groove Interactions Link Target Proteins To The B-Propeller Of Clathrin	Library		-0.257451		-0.452651		-0.376985
ENSG00000141367	ENST00000269122	ENSP00000269122	CLTC	CLTC-001	PRINCIPAL:1	265	Q	CAG								0.158115	5	113			FALSE		6			-11.675	0.314909		E	1C9L	gi|7245844|pdb|1C9L|A Chain A, Peptide-In-Groove Interactions Link Target Proteins To The B-Propeller Of Clathrin >gi|7245845|pdb|1C9L|B Chain B, Peptide-In-Groove Interactions Link Target Proteins To The B-Propeller Of Clathrin	Library		-0.250748		-0.412331		-0.37188
ENSG00000141367	ENST00000269122	ENSP00000269122	CLTC	CLTC-001	PRINCIPAL:1	266	I	ATC								0.158711	6	173			FALSE		6			-9.769	0.323923		E	1C9L	gi|7245844|pdb|1C9L|A Chain A, Peptide-In-Groove Interactions Link Target Proteins To The B-Propeller Of Clathrin >gi|7245845|pdb|1C9L|B Chain B, Peptide-In-Groove Interactions Link Target Proteins To The B-Propeller Of Clathrin	Library		-0.301789		-0.432336		-0.404353
ENSG00000141367	ENST00000269122	ENSP00000269122	CLTC	CLTC-001	PRINCIPAL:1	267	S	AGT								0.159308	6	173			FALSE		6			-9.281	0.3078		C	1C9L	gi|7245844|pdb|1C9L|A Chain A, Peptide-In-Groove Interactions Link Target Proteins To The B-Propeller Of Clathrin >gi|7245845|pdb|1C9L|B Chain B, Peptide-In-Groove Interactions Link Target Proteins To The B-Propeller Of Clathrin	Library		-0.362461		-0.466672		-0.444315
ENSG00000141367	ENST00000269122	ENSP00000269122	CLTC	CLTC-001	PRINCIPAL:1	268	E	GAA								0.159905	6	173			FALSE		6			-7.602	0.285104		C	1C9L	gi|7245844|pdb|1C9L|A Chain A, Peptide-In-Groove Interactions Link Target Proteins To The B-Propeller Of Clathrin >gi|7245845|pdb|1C9L|B Chain B, Peptide-In-Groove Interactions Link Target Proteins To The B-Propeller Of Clathrin	Library		-0.467813		-0.549924		-0.516768
ENSG00000141367	ENST00000269122	ENSP00000269122	CLTC	CLTC-001	PRINCIPAL:1	269	K	AAG								0.160501	6	173			FALSE		6			-10.376	0.262103		C	1C9L	gi|7245844|pdb|1C9L|A Chain A, Peptide-In-Groove Interactions Link Target Proteins To The B-Propeller Of Clathrin >gi|7245845|pdb|1C9L|B Chain B, Peptide-In-Groove Interactions Link Target Proteins To The B-Propeller Of Clathrin	Library		-0.544432		-0.611726		-0.574629
ENSG00000141367	ENST00000269122	ENSP00000269122	CLTC	CLTC-001	PRINCIPAL:1	270	H	CAT	GATCAGTGAAAAGCATGATG	chr17	57733230	+	51	99	68	0.161098	6	173	15	158	FALSE	FALSE	6	2	0.333333	-13.574	0.219924		C	1C9L	gi|7245844|pdb|1C9L|A Chain A, Peptide-In-Groove Interactions Link Target Proteins To The B-Propeller Of Clathrin >gi|7245845|pdb|1C9L|B Chain B, Peptide-In-Groove Interactions Link Target Proteins To The B-Propeller Of Clathrin	Library	-0.17	-0.670712	-0.140197	-0.733064	-0.28	-0.679377
ENSG00000141367	ENST00000269122	ENSP00000269122	CLTC	CLTC-001	PRINCIPAL:1	271	D	GAT	GATCAGTGAAAAGCATGATG	chr17	57733230	+	51	99	68	0.161695	6	173	15	158	FALSE	FALSE	6	2	0.333333	-8.905	0.164401		C	1C9L	gi|7245844|pdb|1C9L|A Chain A, Peptide-In-Groove Interactions Link Target Proteins To The B-Propeller Of Clathrin >gi|7245845|pdb|1C9L|B Chain B, Peptide-In-Groove Interactions Link Target Proteins To The B-Propeller Of Clathrin	Library	-0.17	-0.787422	-0.140197	-0.848357	-0.28	-0.785016
ENSG00000141367	ENST00000269122	ENSP00000269122	CLTC	CLTC-001	PRINCIPAL:1	272	V	GTG								0.162291	6	173			FALSE		6			-10.762	0.131742		E	1C9L	gi|7245844|pdb|1C9L|A Chain A, Peptide-In-Groove Interactions Link Target Proteins To The B-Propeller Of Clathrin >gi|7245845|pdb|1C9L|B Chain B, Peptide-In-Groove Interactions Link Target Proteins To The B-Propeller Of Clathrin	Library		-0.853687		-0.909582		-0.846987
ENSG00000141367	ENST00000269122	ENSP00000269122	CLTC	CLTC-001	PRINCIPAL:1	273	V	GTG								0.162888	6	173			FALSE		6			-10.762	0.099831		E	1C9L	gi|7245844|pdb|1C9L|A Chain A, Peptide-In-Groove Interactions Link Target Proteins To The B-Propeller Of Clathrin >gi|7245845|pdb|1C9L|B Chain B, Peptide-In-Groove Interactions Link Target Proteins To The B-Propeller Of Clathrin	Library		-0.911534		-0.963187		-0.902921
ENSG00000141367	ENST00000269122	ENSP00000269122	CLTC	CLTC-001	PRINCIPAL:1	274	F	TTC								0.163484	6	173			FALSE		6			-11.331	0.074016		E	1C9L	gi|7245844|pdb|1C9L|A Chain A, Peptide-In-Groove Interactions Link Target Proteins To The B-Propeller Of Clathrin >gi|7245845|pdb|1C9L|B Chain B, Peptide-In-Groove Interactions Link Target Proteins To The B-Propeller Of Clathrin	Library		-0.948067		-0.992877		-0.937613
ENSG00000141367	ENST00000269122	ENSP00000269122	CLTC	CLTC-001	PRINCIPAL:1	275	L	TTG								0.164081	6	173			FALSE		6			-11.469	0.066599		E	1C9L	gi|7245844|pdb|1C9L|A Chain A, Peptide-In-Groove Interactions Link Target Proteins To The B-Propeller Of Clathrin >gi|7245845|pdb|1C9L|B Chain B, Peptide-In-Groove Interactions Link Target Proteins To The B-Propeller Of Clathrin	Library		-0.987824		-1.02637		-0.97624
ENSG00000141367	ENST00000269122	ENSP00000269122	CLTC	CLTC-001	PRINCIPAL:1	276	I	ATA								0.164678	6	173			FALSE		6			-11.383	0.062238		E	1C9L	gi|7245844|pdb|1C9L|A Chain A, Peptide-In-Groove Interactions Link Target Proteins To The B-Propeller Of Clathrin >gi|7245845|pdb|1C9L|B Chain B, Peptide-In-Groove Interactions Link Target Proteins To The B-Propeller Of Clathrin	Library		-1.03647		-1.07284		-1.02606
ENSG00000141367	ENST00000269122	ENSP00000269122	CLTC	CLTC-001	PRINCIPAL:1	277	T	ACC	GTGTTCTTGATAACCAAGTA	chr17	57733252	+	75	27	68	0.165274	6	173	37	136	FALSE	FALSE	6	2	0.333333	-12.508	0.055985		E	1C9L	gi|7245844|pdb|1C9L|A Chain A, Peptide-In-Groove Interactions Link Target Proteins To The B-Propeller Of Clathrin >gi|7245845|pdb|1C9L|B Chain B, Peptide-In-Groove Interactions Link Target Proteins To The B-Propeller Of Clathrin	Library	0.79	-1.07925	0.494389	-1.11344	0.3	-1.07039
ENSG00000141367	ENST00000269122	ENSP00000269122	CLTC	CLTC-001	PRINCIPAL:1	278	K	AAG	GTGTTCTTGATAACCAAGTA	chr17	57733252	+	75	27	68	0.165871	6	173	37	136	FALSE	FALSE	6	2	0.333333	-12.508	0.054706		C	1C9L	gi|7245844|pdb|1C9L|A Chain A, Peptide-In-Groove Interactions Link Target Proteins To The B-Propeller Of Clathrin >gi|7245845|pdb|1C9L|B Chain B, Peptide-In-Groove Interactions Link Target Proteins To The B-Propeller Of Clathrin	Library	0.79	-1.11784	0.494389	-1.14976	0.3	-1.11042
ENSG00000141367	ENST00000269122	ENSP00000269122	CLTC	CLTC-001	PRINCIPAL:1	278	K	AAG	GAGGTGGATATAACCATACT	chr17	57733254	-	75	69	71	0.165871	6	173	39	134	FALSE	FALSE	6	2	0.333333	-12.508	0.054706		C	1C9L	gi|7245844|pdb|1C9L|A Chain A, Peptide-In-Groove Interactions Link Target Proteins To The B-Propeller Of Clathrin >gi|7245845|pdb|1C9L|B Chain B, Peptide-In-Groove Interactions Link Target Proteins To The B-Propeller Of Clathrin	Library	-2.24	-1.11784	-2.37209	-1.14976	-2.37	-1.11042
ENSG00000141367	ENST00000269122	ENSP00000269122	CLTC	CLTC-001	PRINCIPAL:1	279	Y	TAT	GAGGTGGATATAACCATACT	chr17	57733254	-	75	69	71	0.166468	6	173	39	134	FALSE	FALSE	6	2	0.333333	-12.868	0.049623		C	1C9L	gi|7245844|pdb|1C9L|A Chain A, Peptide-In-Groove Interactions Link Target Proteins To The B-Propeller Of Clathrin >gi|7245845|pdb|1C9L|B Chain B, Peptide-In-Groove Interactions Link Target Proteins To The B-Propeller Of Clathrin	Library	-2.24	-1.16234	-2.37209	-1.18888	-2.37	-1.15235
ENSG00000141367	ENST00000269122	ENSP00000269122	CLTC	CLTC-001	PRINCIPAL:1	280	G	GGT								0.167064	6	173			FALSE		6			-13.347	0.049014		C	1C9L	gi|7245844|pdb|1C9L|A Chain A, Peptide-In-Groove Interactions Link Target Proteins To The B-Propeller Of Clathrin >gi|7245845|pdb|1C9L|B Chain B, Peptide-In-Groove Interactions Link Target Proteins To The B-Propeller Of Clathrin	Library		-1.20247		-1.22642		-1.19203
ENSG00000141367	ENST00000269122	ENSP00000269122	CLTC	CLTC-001	PRINCIPAL:1	281	Y	TAT								0.167661	6	173			FALSE		6			-13.388	0.054188		E	1C9L	gi|7245844|pdb|1C9L|A Chain A, Peptide-In-Groove Interactions Link Target Proteins To The B-Propeller Of Clathrin >gi|7245845|pdb|1C9L|B Chain B, Peptide-In-Groove Interactions Link Target Proteins To The B-Propeller Of Clathrin	Library		-1.22498		-1.25008		-1.21755
ENSG00000141367	ENST00000269122	ENSP00000269122	CLTC	CLTC-001	PRINCIPAL:1	282	I	ATC								0.168258	6	173			FALSE		6			-10.836	0.072793		E	1C9L	gi|7245844|pdb|1C9L|A Chain A, Peptide-In-Groove Interactions Link Target Proteins To The B-Propeller Of Clathrin >gi|7245845|pdb|1C9L|B Chain B, Peptide-In-Groove Interactions Link Target Proteins To The B-Propeller Of Clathrin	Library		-1.26386		-1.28658		-1.25386
ENSG00000141367	ENST00000269122	ENSP00000269122	CLTC	CLTC-001	PRINCIPAL:1	283	H	CAC	CAGTCTCAAGATCATAGAGG	chr17	57733270	-	67	89	47	0.168854	6	173	55	118	FALSE	FALSE	6	2	0.333333	-15.025	0.084806		E	1C9L	gi|7245844|pdb|1C9L|A Chain A, Peptide-In-Groove Interactions Link Target Proteins To The B-Propeller Of Clathrin >gi|7245845|pdb|1C9L|B Chain B, Peptide-In-Groove Interactions Link Target Proteins To The B-Propeller Of Clathrin	Library	-2.4	-1.27912	-2.28999	-1.30441	-2.49	-1.27084
ENSG00000141367	ENST00000269122	ENSP00000269122	CLTC	CLTC-001	PRINCIPAL:1	284	L	CTC	CAGTCTCAAGATCATAGAGG	chr17	57733270	-	67	89	47	0.169451	6	173	55	118	FALSE	FALSE	6	2	0.333333	-10.5	0.097056		E	1C9L	gi|7245844|pdb|1C9L|A Chain A, Peptide-In-Groove Interactions Link Target Proteins To The B-Propeller Of Clathrin >gi|7245845|pdb|1C9L|B Chain B, Peptide-In-Groove Interactions Link Target Proteins To The B-Propeller Of Clathrin	Library	-2.4	-1.29153	-2.28999	-1.322	-2.49	-1.28648
ENSG00000141367	ENST00000269122	ENSP00000269122	CLTC	CLTC-001	PRINCIPAL:1	284	L	CTC	TACCAGTCTCAAGATCATAG	chr17	57733273	-	81	94	58	0.169451	6	173	58	115	FALSE	FALSE	6	2	0.333333	-10.5	0.097056		E	1C9L	gi|7245844|pdb|1C9L|A Chain A, Peptide-In-Groove Interactions Link Target Proteins To The B-Propeller Of Clathrin >gi|7245845|pdb|1C9L|B Chain B, Peptide-In-Groove Interactions Link Target Proteins To The B-Propeller Of Clathrin	Library	-3.06	-1.29153	-2.6497	-1.322	-2.5	-1.28648
ENSG00000141367	ENST00000269122	ENSP00000269122	CLTC	CLTC-001	PRINCIPAL:1	285	Y	TAT	TACCAGTCTCAAGATCATAG	chr17	57733273	-	81	94	58	0.170048	6	173	58	115	FALSE	FALSE	6	2	0.333333	-14.178	0.110936		E	1C9L	gi|7245844|pdb|1C9L|A Chain A, Peptide-In-Groove Interactions Link Target Proteins To The B-Propeller Of Clathrin >gi|7245845|pdb|1C9L|B Chain B, Peptide-In-Groove Interactions Link Target Proteins To The B-Propeller Of Clathrin	Library	-3.06	-1.30231	-2.6497	-1.34095	-2.5	-1.30285
ENSG00000141367	ENST00000269122	ENSP00000269122	CLTC	CLTC-001	PRINCIPAL:1	286	D	GAT								0.170644	6	173			FALSE		6			-13.257	0.122178		E	1C9L	gi|7245844|pdb|1C9L|A Chain A, Peptide-In-Groove Interactions Link Target Proteins To The B-Propeller Of Clathrin >gi|7245845|pdb|1C9L|B Chain B, Peptide-In-Groove Interactions Link Target Proteins To The B-Propeller Of Clathrin	Library		-1.3125		-1.36143		-1.32044
ENSG00000141367	ENST00000269122	ENSP00000269122	CLTC	CLTC-001	PRINCIPAL:1	287	L	CTT	CACCTCTATGATCTTGAGAC	chr17	57733282	+	77	66	61	0.171241	6	173	67	106	FALSE	FALSE	6	2	0.333333	-10.913	0.121751		C	1C9L	gi|7245844|pdb|1C9L|A Chain A, Peptide-In-Groove Interactions Link Target Proteins To The B-Propeller Of Clathrin >gi|7245845|pdb|1C9L|B Chain B, Peptide-In-Groove Interactions Link Target Proteins To The B-Propeller Of Clathrin	Library	-1.53	-1.35142	-0.288647	-1.40561	-0.12	-1.35933
ENSG00000141367	ENST00000269122	ENSP00000269122	CLTC	CLTC-001	PRINCIPAL:1	288	E	GAG	CACCTCTATGATCTTGAGAC	chr17	57733282	+	77	66	61	0.171838	6	173	67	106	FALSE	FALSE	6	2	0.333333	-12.475	0.134722		C	1C9L	gi|7245844|pdb|1C9L|A Chain A, Peptide-In-Groove Interactions Link Target Proteins To The B-Propeller Of Clathrin >gi|7245845|pdb|1C9L|B Chain B, Peptide-In-Groove Interactions Link Target Proteins To The B-Propeller Of Clathrin	Library	-1.53	-1.39231	-0.288647	-1.45399	-0.12	-1.40073
ENSG00000141367	ENST00000269122	ENSP00000269122	CLTC	CLTC-001	PRINCIPAL:1	289	T	ACT								0.172434	6	173			FALSE		6			-10.018	0.127158		C	1C9L	gi|7245844|pdb|1C9L|A Chain A, Peptide-In-Groove Interactions Link Target Proteins To The B-Propeller Of Clathrin >gi|7245845|pdb|1C9L|B Chain B, Peptide-In-Groove Interactions Link Target Proteins To The B-Propeller Of Clathrin	Library		-1.46244		-1.52956		-1.46386
ENSG00000141367	ENST00000269122	ENSP00000269122	CLTC	CLTC-001	PRINCIPAL:1	290	G	GGT								0.173031	6	173			FALSE		6			-12.874	0.118671		C	1C9L	gi|7245844|pdb|1C9L|A Chain A, Peptide-In-Groove Interactions Link Target Proteins To The B-Propeller Of Clathrin >gi|7245845|pdb|1C9L|B Chain B, Peptide-In-Groove Interactions Link Target Proteins To The B-Propeller Of Clathrin	Library		-1.48657		-1.5676		-1.4935
ENSG00000141367	ENST00000269122	ENSP00000269122	CLTC	CLTC-001	PRINCIPAL:1	291	T	ACC								0.173628	6	173			FALSE		6			-9.484	0.111846		E	1C9L	gi|7245844|pdb|1C9L|A Chain A, Peptide-In-Groove Interactions Link Target Proteins To The B-Propeller Of Clathrin >gi|7245845|pdb|1C9L|B Chain B, Peptide-In-Groove Interactions Link Target Proteins To The B-Propeller Of Clathrin	Library		-1.48313		-1.58128		-1.50377
ENSG00000141367	ENST00000269122	ENSP00000269122	CLTC	CLTC-001	PRINCIPAL:1	292	C	TGC	GATTCTATTCATGTAGATGC	chr17	57733296	-	71	66	64	0.174224	6	173	81	92	FALSE	FALSE	6	2	0.333333	-14.967	0.105347		E	1C9L	gi|7245844|pdb|1C9L|A Chain A, Peptide-In-Groove Interactions Link Target Proteins To The B-Propeller Of Clathrin >gi|7245845|pdb|1C9L|B Chain B, Peptide-In-Groove Interactions Link Target Proteins To The B-Propeller Of Clathrin	Library	-1.02	-1.47858	-2.42354	-1.58919	-1.44	-1.51072
ENSG00000141367	ENST00000269122	ENSP00000269122	CLTC	CLTC-001	PRINCIPAL:1	293	I	ATC	GATTCTATTCATGTAGATGC	chr17	57733296	-	71	66	64	0.174821	6	173	81	92	FALSE	FALSE	6	2	0.333333	-11.524	0.107645		E	1C9L	gi|7245844|pdb|1C9L|A Chain A, Peptide-In-Groove Interactions Link Target Proteins To The B-Propeller Of Clathrin >gi|7245845|pdb|1C9L|B Chain B, Peptide-In-Groove Interactions Link Target Proteins To The B-Propeller Of Clathrin	Library	-1.02	-1.47412	-2.42354	-1.59206	-1.44	-1.51471
ENSG00000141367	ENST00000269122	ENSP00000269122	CLTC	CLTC-001	PRINCIPAL:1	294	Y	TAC								0.175418	6	173			FALSE		6			-13.938	0.125538		E	1C9L	gi|7245844|pdb|1C9L|A Chain A, Peptide-In-Groove Interactions Link Target Proteins To The B-Propeller Of Clathrin >gi|7245845|pdb|1C9L|B Chain B, Peptide-In-Groove Interactions Link Target Proteins To The B-Propeller Of Clathrin	Library		-1.47781		-1.6041		-1.5236
ENSG00000141367	ENST00000269122	ENSP00000269122	CLTC	CLTC-001	PRINCIPAL:1	295	M	ATG								0.176014	6	173			FALSE		6			-12.031	0.135633		E	1C9L	gi|7245844|pdb|1C9L|A Chain A, Peptide-In-Groove Interactions Link Target Proteins To The B-Propeller Of Clathrin >gi|7245845|pdb|1C9L|B Chain B, Peptide-In-Groove Interactions Link Target Proteins To The B-Propeller Of Clathrin	Library		-1.47484		-1.60766		-1.52545
ENSG00000141367	ENST00000269122	ENSP00000269122	CLTC	CLTC-001	PRINCIPAL:1	296	N	AAT								0.176611	6	173			FALSE		6			-13.174	0.138961		E	1C9L	gi|7245844|pdb|1C9L|A Chain A, Peptide-In-Groove Interactions Link Target Proteins To The B-Propeller Of Clathrin >gi|7245845|pdb|1C9L|B Chain B, Peptide-In-Groove Interactions Link Target Proteins To The B-Propeller Of Clathrin	Library		-1.46734		-1.59935		-1.51979
ENSG00000141367	ENST00000269122	ENSP00000269122	CLTC	CLTC-001	PRINCIPAL:1	297	R	AGA	ATCTACATGAATAGAATCAG	chr17	57733312	+	56	92	74	0.177208	6	173	97	76	FALSE	FALSE	6	2	0.333333	-12.34	0.144913		E	1C9L	gi|7245844|pdb|1C9L|A Chain A, Peptide-In-Groove Interactions Link Target Proteins To The B-Propeller Of Clathrin >gi|7245845|pdb|1C9L|B Chain B, Peptide-In-Groove Interactions Link Target Proteins To The B-Propeller Of Clathrin	Library	-0.71	-1.45718	-1.21684	-1.5873	-1.62	-1.50758
ENSG00000141367	ENST00000269122	ENSP00000269122	CLTC	CLTC-001	PRINCIPAL:1	298	I	ATC	ATCTACATGAATAGAATCAG	chr17	57733312	+	56	92	74	0.177804	6	173	97	76	FALSE	FALSE	6	2	0.333333	-11.644	0.145078		C	1C9L	gi|7245844|pdb|1C9L|A Chain A, Peptide-In-Groove Interactions Link Target Proteins To The B-Propeller Of Clathrin >gi|7245845|pdb|1C9L|B Chain B, Peptide-In-Groove Interactions Link Target Proteins To The B-Propeller Of Clathrin	Library	-0.71	-1.44735	-1.21684	-1.5808	-1.62	-1.49731
ENSG00000141367	ENST00000269122	ENSP00000269122	CLTC	CLTC-001	PRINCIPAL:1	299	S	AGT								0.178401	6	173			FALSE		6			-11.539	0.157224		C	1C9L	gi|7245844|pdb|1C9L|A Chain A, Peptide-In-Groove Interactions Link Target Proteins To The B-Propeller Of Clathrin >gi|7245845|pdb|1C9L|B Chain B, Peptide-In-Groove Interactions Link Target Proteins To The B-Propeller Of Clathrin	Library		-1.43999		-1.57108		-1.48267
ENSG00000141367	ENST00000269122	ENSP00000269122	CLTC	CLTC-001	PRINCIPAL:1	300	G	GGA								0.178998	6	173			FALSE		6			-9.088	0.181328		C	1C9L	gi|7245844|pdb|1C9L|A Chain A, Peptide-In-Groove Interactions Link Target Proteins To The B-Propeller Of Clathrin >gi|7245845|pdb|1C9L|B Chain B, Peptide-In-Groove Interactions Link Target Proteins To The B-Propeller Of Clathrin	Library		-1.43816		-1.56729		-1.4722
ENSG00000141367	ENST00000269122	ENSP00000269122	CLTC	CLTC-001	PRINCIPAL:1	301	E	GAA								0.179594	6	173			FALSE		6			-10.722	0.20665		C	1C9L	gi|7245844|pdb|1C9L|A Chain A, Peptide-In-Groove Interactions Link Target Proteins To The B-Propeller Of Clathrin >gi|7245845|pdb|1C9L|B Chain B, Peptide-In-Groove Interactions Link Target Proteins To The B-Propeller Of Clathrin	Library		-1.44059		-1.56828		-1.46607
ENSG00000141367	ENST00000269122	ENSP00000269122	CLTC	CLTC-001	PRINCIPAL:1	302	T	ACA								0.180191	6	173			FALSE		6			-11.906	0.219863		E	1C9L	gi|7245844|pdb|1C9L|A Chain A, Peptide-In-Groove Interactions Link Target Proteins To The B-Propeller Of Clathrin >gi|7245845|pdb|1C9L|B Chain B, Peptide-In-Groove Interactions Link Target Proteins To The B-Propeller Of Clathrin	Library		-1.42926		-1.56317		-1.45648
ENSG00000141367	ENST00000269122	ENSP00000269122	CLTC	CLTC-001	PRINCIPAL:1	303	I	ATT								0.180788	6	173			FALSE		6			-11.537	0.224584		E	1C9L	gi|7245844|pdb|1C9L|A Chain A, Peptide-In-Groove Interactions Link Target Proteins To The B-Propeller Of Clathrin >gi|7245845|pdb|1C9L|B Chain B, Peptide-In-Groove Interactions Link Target Proteins To The B-Propeller Of Clathrin	Library		-1.41406		-1.55479		-1.44372
ENSG00000141367	ENST00000269122	ENSP00000269122	CLTC	CLTC-001	PRINCIPAL:1	304	F	TTT								0.181384	6	173			FALSE		6			-13.343	0.244032		E	1C9L	gi|7245844|pdb|1C9L|A Chain A, Peptide-In-Groove Interactions Link Target Proteins To The B-Propeller Of Clathrin >gi|7245845|pdb|1C9L|B Chain B, Peptide-In-Groove Interactions Link Target Proteins To The B-Propeller Of Clathrin	Library		-1.3952		-1.54318		-1.42798
ENSG00000141367	ENST00000269122	ENSP00000269122	CLTC	CLTC-001	PRINCIPAL:1	305	V	GTT								0.181981	6	173			FALSE		6			-11.645	0.259862		E	1C9L	gi|7245844|pdb|1C9L|A Chain A, Peptide-In-Groove Interactions Link Target Proteins To The B-Propeller Of Clathrin >gi|7245845|pdb|1C9L|B Chain B, Peptide-In-Groove Interactions Link Target Proteins To The B-Propeller Of Clathrin	Library		-1.37328		-1.52854		-1.40969
ENSG00000141367	ENST00000269122	ENSP00000269122	CLTC	CLTC-001	PRINCIPAL:1	306	T	ACT								0.182578	6	173			FALSE		6			-12.482	0.269155		E	1C9L	gi|7245844|pdb|1C9L|A Chain A, Peptide-In-Groove Interactions Link Target Proteins To The B-Propeller Of Clathrin >gi|7245845|pdb|1C9L|B Chain B, Peptide-In-Groove Interactions Link Target Proteins To The B-Propeller Of Clathrin	Library		-1.34945		-1.51149		-1.38974
ENSG00000141367	ENST00000269122	ENSP00000269122	CLTC	CLTC-001	PRINCIPAL:1	307	A	GCA								0.183174	6	173			FALSE		6			-10.771	0.274763		C	1C9L	gi|7245844|pdb|1C9L|A Chain A, Peptide-In-Groove Interactions Link Target Proteins To The B-Propeller Of Clathrin >gi|7245845|pdb|1C9L|B Chain B, Peptide-In-Groove Interactions Link Target Proteins To The B-Propeller Of Clathrin	Library		-1.32556		-1.49306		-1.36947
ENSG00000141367	ENST00000269122	ENSP00000269122	CLTC	CLTC-001	PRINCIPAL:1	308	P	CCT	ATTCCAGCTGTGGCTTCATG	chr17	57733346	-	45	75	40	0.183771	6	173	131	42	FALSE	FALSE	6	2	0.333333	-11.924	0.287383		C	1C9L	gi|7245844|pdb|1C9L|A Chain A, Peptide-In-Groove Interactions Link Target Proteins To The B-Propeller Of Clathrin >gi|7245845|pdb|1C9L|B Chain B, Peptide-In-Groove Interactions Link Target Proteins To The B-Propeller Of Clathrin	Library	-1.21	-1.30372	-0.876303	-1.47461	-1.61	-1.35043
ENSG00000141367	ENST00000269122	ENSP00000269122	CLTC	CLTC-001	PRINCIPAL:1	309	H	CAT	ATTCCAGCTGTGGCTTCATG	chr17	57733346	-	45	75	40	0.184368	6	173	131	42	FALSE	FALSE	6	2	0.333333	-12.831	0.276203		C	1C9L	gi|7245844|pdb|1C9L|A Chain A, Peptide-In-Groove Interactions Link Target Proteins To The B-Propeller Of Clathrin >gi|7245845|pdb|1C9L|B Chain B, Peptide-In-Groove Interactions Link Target Proteins To The B-Propeller Of Clathrin	Library	-1.21	-1.28504	-0.876303	-1.457	-1.61	-1.33343
ENSG00000141367	ENST00000269122	ENSP00000269122	CLTC	CLTC-001	PRINCIPAL:1	310	E	GAA								0.184964	6	173			FALSE		6			-10.975	0.26753		C	1C9L	gi|7245844|pdb|1C9L|A Chain A, Peptide-In-Groove Interactions Link Target Proteins To The B-Propeller Of Clathrin >gi|7245845|pdb|1C9L|B Chain B, Peptide-In-Groove Interactions Link Target Proteins To The B-Propeller Of Clathrin	Library		-1.29742		-1.46207		-1.33218
ENSG00000141367	ENST00000269122	ENSP00000269122	CLTC	CLTC-001	PRINCIPAL:1	311	A	GCC	GCACCTCATGAAGCCACAGC	chr17	57733354	+	29	59	62	0.185561	6	173	139	34	FALSE	FALSE	6	2	0.333333	-8.744	0.272291		C	1C9L	gi|7245844|pdb|1C9L|A Chain A, Peptide-In-Groove Interactions Link Target Proteins To The B-Propeller Of Clathrin >gi|7245845|pdb|1C9L|B Chain B, Peptide-In-Groove Interactions Link Target Proteins To The B-Propeller Of Clathrin	Library	-0.24	-1.30407	-0.138371	-1.46272	0.08	-1.32626
ENSG00000141367	ENST00000269122	ENSP00000269122	CLTC	CLTC-001	PRINCIPAL:1	312	T	ACA	GCACCTCATGAAGCCACAGC	chr17	57733354	+	29	59	62	0.186158	6	173	139	34	FALSE	FALSE	6	2	0.333333	-11.073	0.282981		C	1C9L	gi|7245844|pdb|1C9L|A Chain A, Peptide-In-Groove Interactions Link Target Proteins To The B-Propeller Of Clathrin >gi|7245845|pdb|1C9L|B Chain B, Peptide-In-Groove Interactions Link Target Proteins To The B-Propeller Of Clathrin	Library	-0.24	-1.30547	-0.138371	-1.459	0.08	-1.31611
ENSG00000141367	ENST00000269122	ENSP00000269122	CLTC	CLTC-001	PRINCIPAL:1	312	T	ACA	TACTCCAATTATTCCAGCTG	chr17	57733356	-	39	43	47	0.186158	6	173	141	32	FALSE	FALSE	6	2	0.333333	-11.073	0.282981		C	1C9L	gi|7245844|pdb|1C9L|A Chain A, Peptide-In-Groove Interactions Link Target Proteins To The B-Propeller Of Clathrin >gi|7245845|pdb|1C9L|B Chain B, Peptide-In-Groove Interactions Link Target Proteins To The B-Propeller Of Clathrin	Library	-0.84	-1.30547	-1.03465	-1.459	-0.74	-1.31611
ENSG00000141367	ENST00000269122	ENSP00000269122	CLTC	CLTC-001	PRINCIPAL:1	313	A	GCT	TACTCCAATTATTCCAGCTG	chr17	57733356	-	39	43	47	0.186754	6	173	141	32	FALSE	FALSE	6	2	0.333333	-8.572	0.282819		C	1C9L	gi|7245844|pdb|1C9L|A Chain A, Peptide-In-Groove Interactions Link Target Proteins To The B-Propeller Of Clathrin >gi|7245845|pdb|1C9L|B Chain B, Peptide-In-Groove Interactions Link Target Proteins To The B-Propeller Of Clathrin	Library	-0.84	-1.30267	-1.03465	-1.45173	-0.74	-1.30305
ENSG00000141367	ENST00000269122	ENSP00000269122	CLTC	CLTC-001	PRINCIPAL:1	314	G	GGA	GAAGCCACAGCTGGAATAAT	chr17	57733363	+	51	8	51	0.187351	6	173	148	25	FALSE	FALSE	6	2	0.333333	-12.644	0.283417		C	1C9L	gi|7245844|pdb|1C9L|A Chain A, Peptide-In-Groove Interactions Link Target Proteins To The B-Propeller Of Clathrin >gi|7245845|pdb|1C9L|B Chain B, Peptide-In-Groove Interactions Link Target Proteins To The B-Propeller Of Clathrin	Library	-1.38	-1.29155	-2.53702	-1.43777	-1.5	-1.28741
ENSG00000141367	ENST00000269122	ENSP00000269122	CLTC	CLTC-001	PRINCIPAL:1	315	I	ATA	GAAGCCACAGCTGGAATAAT	chr17	57733363	+	51	8	51	0.187947	6	173	148	25	FALSE	FALSE	6	2	0.333333	-10.433	0.264193		E	1C9L	gi|7245844|pdb|1C9L|A Chain A, Peptide-In-Groove Interactions Link Target Proteins To The B-Propeller Of Clathrin >gi|7245845|pdb|1C9L|B Chain B, Peptide-In-Groove Interactions Link Target Proteins To The B-Propeller Of Clathrin	Library	-1.38	-1.27517	-2.53702	-1.41913	-1.5	-1.27077
ENSG00000141367	ENST00000269122	ENSP00000269122	CLTC	CLTC-001	PRINCIPAL:1	316	I	ATT								0.188544	6	173			FALSE		6			-10.433	0.23658		E	1C9L	gi|7245844|pdb|1C9L|A Chain A, Peptide-In-Groove Interactions Link Target Proteins To The B-Propeller Of Clathrin >gi|7245845|pdb|1C9L|B Chain B, Peptide-In-Groove Interactions Link Target Proteins To The B-Propeller Of Clathrin	Library		-1.2606		-1.40111		-1.25498
ENSG00000141367	ENST00000269122	ENSP00000269122	CLTC	CLTC-001	PRINCIPAL:1	317	G	GGA								0.189141	6	173			FALSE		6			-12.328	0.239633		E	1C9L	gi|7245844|pdb|1C9L|A Chain A, Peptide-In-Groove Interactions Link Target Proteins To The B-Propeller Of Clathrin >gi|7245845|pdb|1C9L|B Chain B, Peptide-In-Groove Interactions Link Target Proteins To The B-Propeller Of Clathrin	Library		-1.24947		-1.38489		-1.24104
ENSG00000141367	ENST00000269122	ENSP00000269122	CLTC	CLTC-001	PRINCIPAL:1	318	V	GTA								0.189737	6	173			FALSE		6			-10.901	0.242172		E	1C9L	gi|7245844|pdb|1C9L|A Chain A, Peptide-In-Groove Interactions Link Target Proteins To The B-Propeller Of Clathrin >gi|7245845|pdb|1C9L|B Chain B, Peptide-In-Groove Interactions Link Target Proteins To The B-Propeller Of Clathrin	Library		-1.24338		-1.37153		-1.22975
ENSG00000141367	ENST00000269122	ENSP00000269122	CLTC	CLTC-001	PRINCIPAL:1	319	N	AAC	ATAATTGGAGTAAACAGAAA	chr17	57733378	+	21	63	61	0.190334	6	173	163	10	FALSE	FALSE	6	2	0.333333	-12.657	0.241463		E	1C9L	gi|7245844|pdb|1C9L|A Chain A, Peptide-In-Groove Interactions Link Target Proteins To The B-Propeller Of Clathrin >gi|7245845|pdb|1C9L|B Chain B, Peptide-In-Groove Interactions Link Target Proteins To The B-Propeller Of Clathrin	Library	-1.42	-1.23932	-1.76767	-1.35992	-1.87	-1.21727
ENSG00000141367	ENST00000269122	ENSP00000269122	CLTC	CLTC-001	PRINCIPAL:1	319	N	AAC	AATAATTGGAGTAAACAGAA	chr17	57733377	+	40	69	64	0.190334	6	173	162	11	FALSE	FALSE	6	2	0.333333	-12.657	0.241463		E	1C9L	gi|7245844|pdb|1C9L|A Chain A, Peptide-In-Groove Interactions Link Target Proteins To The B-Propeller Of Clathrin >gi|7245845|pdb|1C9L|B Chain B, Peptide-In-Groove Interactions Link Target Proteins To The B-Propeller Of Clathrin	Library	-1.46	-1.23932	-1.73592	-1.35992	-1.52	-1.21727
ENSG00000141367	ENST00000269122	ENSP00000269122	CLTC	CLTC-001	PRINCIPAL:1	320	R	AGA	AATAATTGGAGTAAACAGAA	chr17	57733377	+	40	69	64	0.190931	6	173	162	11	FALSE	FALSE	6	2	0.333333	-10.699	0.231752		C	1C9L	gi|7245844|pdb|1C9L|A Chain A, Peptide-In-Groove Interactions Link Target Proteins To The B-Propeller Of Clathrin >gi|7245845|pdb|1C9L|B Chain B, Peptide-In-Groove Interactions Link Target Proteins To The B-Propeller Of Clathrin	Library	-1.46	-1.24342	-1.73592	-1.35165	-1.52	-1.21007
ENSG00000141367	ENST00000269122	ENSP00000269122	CLTC	CLTC-001	PRINCIPAL:1	320	R	AGA	ATAATTGGAGTAAACAGAAA	chr17	57733378	+	21	63	61	0.190931	6	173	163	10	FALSE	FALSE	6	2	0.333333	-10.699	0.231752		C	1C9L	gi|7245844|pdb|1C9L|A Chain A, Peptide-In-Groove Interactions Link Target Proteins To The B-Propeller Of Clathrin >gi|7245845|pdb|1C9L|B Chain B, Peptide-In-Groove Interactions Link Target Proteins To The B-Propeller Of Clathrin	Library	-1.42	-1.24342	-1.76767	-1.35165	-1.87	-1.21007
ENSG00000141367	ENST00000269122	ENSP00000269122	CLTC	CLTC-001	PRINCIPAL:1	321	K	AAG								0.191527	6	173			FALSE		6			-11.645	0.235215		C	1C9L	gi|7245844|pdb|1C9L|A Chain A, Peptide-In-Groove Interactions Link Target Proteins To The B-Propeller Of Clathrin >gi|7245845|pdb|1C9L|B Chain B, Peptide-In-Groove Interactions Link Target Proteins To The B-Propeller Of Clathrin	Library		-1.25734		-1.34863		-1.20642
ENSG00000141367	ENST00000269122	ENSP00000269122	CLTC	CLTC-001	PRINCIPAL:1	322	G	GGA	TAAACAGAAAGGGACAAGTA	chr17	57733388	+	42	59	66	0.192124	6	173	173	0	FALSE	FALSE	6	2	0.333333	-13.133	0.224455		C	1C9L	gi|7245844|pdb|1C9L|A Chain A, Peptide-In-Groove Interactions Link Target Proteins To The B-Propeller Of Clathrin >gi|7245845|pdb|1C9L|B Chain B, Peptide-In-Groove Interactions Link Target Proteins To The B-Propeller Of Clathrin	Library	-2.54	-1.28261	-2.20133	-1.35192	-2.73	-1.2063
ENSG00000141367	ENST00000269122	ENSP00000269122	CLTC	CLTC-001	PRINCIPAL:1	323	Q	CAA	TAAACAGAAAGGGACAAGTA	chr17	57733388	+	42	59	66	0.192721	6	173	173	0	FALSE	FALSE	6	2	0.333333	-12.34	0.205081		E	1C9L	gi|7245844|pdb|1C9L|A Chain A, Peptide-In-Groove Interactions Link Target Proteins To The B-Propeller Of Clathrin >gi|7245845|pdb|1C9L|B Chain B, Peptide-In-Groove Interactions Link Target Proteins To The B-Propeller Of Clathrin	Library	-2.54	-1.27385	-2.20133	-1.33684	-2.73	-1.18853
ENSG00000141367	ENST00000269122	ENSP00000269122	CLTC	CLTC-001	PRINCIPAL:1	324	V	GTT								0.193317	7	197			FALSE		6			-11.518	0.198409		E	1C9L	gi|7245844|pdb|1C9L|A Chain A, Peptide-In-Groove Interactions Link Target Proteins To The B-Propeller Of Clathrin >gi|7245845|pdb|1C9L|B Chain B, Peptide-In-Groove Interactions Link Target Proteins To The B-Propeller Of Clathrin	Library		-1.2589		-1.31768		-1.16882
ENSG00000141367	ENST00000269122	ENSP00000269122	CLTC	CLTC-001	PRINCIPAL:1	325	L	CTG								0.193914	7	197			FALSE		6			-11.519	0.188711		E	1C9L	gi|7245844|pdb|1C9L|A Chain A, Peptide-In-Groove Interactions Link Target Proteins To The B-Propeller Of Clathrin >gi|7245845|pdb|1C9L|B Chain B, Peptide-In-Groove Interactions Link Target Proteins To The B-Propeller Of Clathrin	Library		-1.23963		-1.29582		-1.14899
ENSG00000141367	ENST00000269122	ENSP00000269122	CLTC	CLTC-001	PRINCIPAL:1	326	S	TCA								0.194511	7	197			FALSE		6			-11.42	0.171268		E	1C9L	gi|7245844|pdb|1C9L|A Chain A, Peptide-In-Groove Interactions Link Target Proteins To The B-Propeller Of Clathrin >gi|7245845|pdb|1C9L|B Chain B, Peptide-In-Groove Interactions Link Target Proteins To The B-Propeller Of Clathrin	Library		-1.24172		-1.28526		-1.13767
ENSG00000141367	ENST00000269122	ENSP00000269122	CLTC	CLTC-001	PRINCIPAL:1	327	V	GTG	GCAGGTTCTGTCAGTGTGTG	chr17	57737764	+	49	84	57	0.195107	7	197	12	185	FALSE	FALSE	6	2	0.333333	-11.402	0.164128		E	1C9L	gi|7245844|pdb|1C9L|A Chain A, Peptide-In-Groove Interactions Link Target Proteins To The B-Propeller Of Clathrin >gi|7245845|pdb|1C9L|B Chain B, Peptide-In-Groove Interactions Link Target Proteins To The B-Propeller Of Clathrin	Library	-1.28	-1.21958	0.0986212	-1.26152	0.38	-1.11978
ENSG00000141367	ENST00000269122	ENSP00000269122	CLTC	CLTC-001	PRINCIPAL:1	328	C	TGT	GCAGGTTCTGTCAGTGTGTG	chr17	57737764	+	49	84	57	0.195704	7	197	12	185	FALSE	FALSE	6	2	0.333333	-12.273	0.167778		E	1C9L	gi|7245844|pdb|1C9L|A Chain A, Peptide-In-Groove Interactions Link Target Proteins To The B-Propeller Of Clathrin >gi|7245845|pdb|1C9L|B Chain B, Peptide-In-Groove Interactions Link Target Proteins To The B-Propeller Of Clathrin	Library	-1.28	-1.19767	0.0986212	-1.23787	0.38	-1.1039
ENSG00000141367	ENST00000269122	ENSP00000269122	CLTC	CLTC-001	PRINCIPAL:1	329	V	GTG								0.196301	7	197			FALSE		6			-11.289	0.157051		E	1C9L	gi|7245844|pdb|1C9L|A Chain A, Peptide-In-Groove Interactions Link Target Proteins To The B-Propeller Of Clathrin >gi|7245845|pdb|1C9L|B Chain B, Peptide-In-Groove Interactions Link Target Proteins To The B-Propeller Of Clathrin	Library		-1.17674		-1.21472		-1.09006
ENSG00000141367	ENST00000269122	ENSP00000269122	CLTC	CLTC-001	PRINCIPAL:1	330	E	GAA								0.196897	7	197			FALSE		6			-9.915	0.1714		C	1C9L	gi|7245844|pdb|1C9L|A Chain A, Peptide-In-Groove Interactions Link Target Proteins To The B-Propeller Of Clathrin >gi|7245845|pdb|1C9L|B Chain B, Peptide-In-Groove Interactions Link Target Proteins To The B-Propeller Of Clathrin	Library		-1.17374		-1.20059		-1.0794
ENSG00000141367	ENST00000269122	ENSP00000269122	CLTC	CLTC-001	PRINCIPAL:1	331	E	GAA								0.197494	7	197			FALSE		6			-9.915	0.195438	Clathrin_H-chain_linker_core	C	1C9L	gi|7245844|pdb|1C9L|A Chain A, Peptide-In-Groove Interactions Link Target Proteins To The B-Propeller Of Clathrin >gi|7245845|pdb|1C9L|B Chain B, Peptide-In-Groove Interactions Link Target Proteins To The B-Propeller Of Clathrin	Library		-1.18344		-1.19316		-1.06689
ENSG00000141367	ENST00000269122	ENSP00000269122	CLTC	CLTC-001	PRINCIPAL:1	332	E	GAA								0.198091	7	197			FALSE		6			-9.915	0.185131	Clathrin_H-chain_linker_core	C	1C9L	gi|7245844|pdb|1C9L|A Chain A, Peptide-In-Groove Interactions Link Target Proteins To The B-Propeller Of Clathrin >gi|7245845|pdb|1C9L|B Chain B, Peptide-In-Groove Interactions Link Target Proteins To The B-Propeller Of Clathrin	Library		-1.18261		-1.18186		-1.04973
ENSG00000141367	ENST00000269122	ENSP00000269122	CLTC	CLTC-001	PRINCIPAL:1	333	N	AAC								0.198687	7	197			FALSE		6			-12.767	0.164188	Clathrin_H-chain_linker_core	H	1C9L	gi|7245844|pdb|1C9L|A Chain A, Peptide-In-Groove Interactions Link Target Proteins To The B-Propeller Of Clathrin >gi|7245845|pdb|1C9L|B Chain B, Peptide-In-Groove Interactions Link Target Proteins To The B-Propeller Of Clathrin	Library		-1.16334		-1.16049		-1.03444
ENSG00000141367	ENST00000269122	ENSP00000269122	CLTC	CLTC-001	PRINCIPAL:1	334	I	ATA								0.199284	7	197			FALSE		6			-10.587	0.154177	Clathrin_H-chain_linker_core	H	1C9L	gi|7245844|pdb|1C9L|A Chain A, Peptide-In-Groove Interactions Link Target Proteins To The B-Propeller Of Clathrin >gi|7245845|pdb|1C9L|B Chain B, Peptide-In-Groove Interactions Link Target Proteins To The B-Propeller Of Clathrin	Library		-1.13676		-1.12947		-1.02261
ENSG00000141367	ENST00000269122	ENSP00000269122	CLTC	CLTC-001	PRINCIPAL:1	335	I	ATT								0.199881	7	197			FALSE		6			-10.587	0.135957	Clathrin_H-chain_linker_core	H	1C9L	gi|7245844|pdb|1C9L|A Chain A, Peptide-In-Groove Interactions Link Target Proteins To The B-Propeller Of Clathrin >gi|7245845|pdb|1C9L|B Chain B, Peptide-In-Groove Interactions Link Target Proteins To The B-Propeller Of Clathrin	Library		-1.11289		-1.09448		-1.01035
ENSG00000141367	ENST00000269122	ENSP00000269122	CLTC	CLTC-001	PRINCIPAL:1	336	P	CCT	TGTAGAACATTGGTGATGTA	chr17	57737793	-	71	21	58	0.200477	7	197	41	156	FALSE	FALSE	6	2	0.333333	-9.918	0.109261	Clathrin_H-chain_linker_core	H	1C9L	gi|7245844|pdb|1C9L|A Chain A, Peptide-In-Groove Interactions Link Target Proteins To The B-Propeller Of Clathrin >gi|7245845|pdb|1C9L|B Chain B, Peptide-In-Groove Interactions Link Target Proteins To The B-Propeller Of Clathrin	Library	-1.02	-1.09267	-2.18262	-1.06587	-1.39	-0.99636
ENSG00000141367	ENST00000269122	ENSP00000269122	CLTC	CLTC-001	PRINCIPAL:1	337	Y	TAC	TGTAGAACATTGGTGATGTA	chr17	57737793	-	71	21	58	0.201074	7	197	41	156	FALSE	FALSE	6	2	0.333333	-13.718	0.108161	Clathrin_H-chain_linker_core	H	1C9L	gi|7245844|pdb|1C9L|A Chain A, Peptide-In-Groove Interactions Link Target Proteins To The B-Propeller Of Clathrin >gi|7245845|pdb|1C9L|B Chain B, Peptide-In-Groove Interactions Link Target Proteins To The B-Propeller Of Clathrin	Library	-1.02	-1.07217	-2.18262	-1.0364	-1.39	-0.98381
ENSG00000141367	ENST00000269122	ENSP00000269122	CLTC	CLTC-001	PRINCIPAL:1	338	I	ATC								0.201671	7	197			FALSE		6			-9.33	0.113565	Clathrin_H-chain_linker_core	H	1C9L	gi|7245844|pdb|1C9L|A Chain A, Peptide-In-Groove Interactions Link Target Proteins To The B-Propeller Of Clathrin >gi|7245845|pdb|1C9L|B Chain B, Peptide-In-Groove Interactions Link Target Proteins To The B-Propeller Of Clathrin	Library		-1.0521		-1.0064		-0.972874
ENSG00000141367	ENST00000269122	ENSP00000269122	CLTC	CLTC-001	PRINCIPAL:1	339	T	ACC								0.202267	7	197			FALSE		6			-10.419	0.110689	Clathrin_H-chain_linker_core	H	1C9L	gi|7245844|pdb|1C9L|A Chain A, Peptide-In-Groove Interactions Link Target Proteins To The B-Propeller Of Clathrin >gi|7245845|pdb|1C9L|B Chain B, Peptide-In-Groove Interactions Link Target Proteins To The B-Propeller Of Clathrin	Library		-1.03935		-0.971796		-0.965926
ENSG00000141367	ENST00000269122	ENSP00000269122	CLTC	CLTC-001	PRINCIPAL:1	340	N	AAT	ATCAGGATTTTGTAGAACAT	chr17	57737803	-	62	46	77	0.202864	7	197	51	146	FALSE	FALSE	6	2	0.333333	-11.14	0.112781	Clathrin_H-chain_linker_core	H	1C9L	gi|7245844|pdb|1C9L|A Chain A, Peptide-In-Groove Interactions Link Target Proteins To The B-Propeller Of Clathrin >gi|7245845|pdb|1C9L|B Chain B, Peptide-In-Groove Interactions Link Target Proteins To The B-Propeller Of Clathrin	Library		-1.03092		-0.94182		-0.962668
ENSG00000141367	ENST00000269122	ENSP00000269122	CLTC	CLTC-001	PRINCIPAL:1	341	V	GTT	ATCAGGATTTTGTAGAACAT	chr17	57737803	-	62	46	77	0.203461	7	197	51	146	FALSE	FALSE	6	2	0.333333	-9.914	0.134808	Clathrin_H-chain_linker_core	C	1C9L	gi|7245844|pdb|1C9L|A Chain A, Peptide-In-Groove Interactions Link Target Proteins To The B-Propeller Of Clathrin >gi|7245845|pdb|1C9L|B Chain B, Peptide-In-Groove Interactions Link Target Proteins To The B-Propeller Of Clathrin	Library		-1.02573		-0.91671		-0.96262
ENSG00000141367	ENST00000269122	ENSP00000269122	CLTC	CLTC-001	PRINCIPAL:1	342	L	CTA								0.204057	7	197			FALSE		6			-10.684	0.151837	Clathrin_H-chain_linker_core	C	1C9L	gi|7245844|pdb|1C9L|A Chain A, Peptide-In-Groove Interactions Link Target Proteins To The B-Propeller Of Clathrin >gi|7245845|pdb|1C9L|B Chain B, Peptide-In-Groove Interactions Link Target Proteins To The B-Propeller Of Clathrin	Library		-1.02272		-0.895949		-0.965012
ENSG00000141367	ENST00000269122	ENSP00000269122	CLTC	CLTC-001	PRINCIPAL:1	343	Q	CAA								0.204654	7	197			FALSE		6			-11.372	0.177105	Clathrin_H-chain_linker_core	C	1C9L	gi|7245844|pdb|1C9L|A Chain A, Peptide-In-Groove Interactions Link Target Proteins To The B-Propeller Of Clathrin >gi|7245845|pdb|1C9L|B Chain B, Peptide-In-Groove Interactions Link Target Proteins To The B-Propeller Of Clathrin	Library		-1.02107		-0.878801		-0.969176
ENSG00000141367	ENST00000269122	ENSP00000269122	CLTC	CLTC-001	PRINCIPAL:1	344	N	AAT								0.205251	7	197			FALSE		6			-13.039	0.211596	Clathrin_H-chain_linker_core	C	1C9L	gi|7245844|pdb|1C9L|A Chain A, Peptide-In-Groove Interactions Link Target Proteins To The B-Propeller Of Clathrin >gi|7245845|pdb|1C9L|B Chain B, Peptide-In-Groove Interactions Link Target Proteins To The B-Propeller Of Clathrin	Library		-1.0114		-0.860079		-0.969354
ENSG00000141367	ENST00000269122	ENSP00000269122	CLTC	CLTC-001	PRINCIPAL:1	345	P	CCT	GCCATTCTCAGAGCCAAATC	chr17	57737820	-	21	32	53	0.205847	7	197	68	129	FALSE	FALSE	6	2	0.333333	-12.804	0.233535	Clathrin_H-chain_linker_core	H	1C9L	gi|7245844|pdb|1C9L|A Chain A, Peptide-In-Groove Interactions Link Target Proteins To The B-Propeller Of Clathrin >gi|7245845|pdb|1C9L|B Chain B, Peptide-In-Groove Interactions Link Target Proteins To The B-Propeller Of Clathrin	Library	-1.29	-0.992995	-0.406965	-0.836293	-1.04	-0.965026
ENSG00000141367	ENST00000269122	ENSP00000269122	CLTC	CLTC-001	PRINCIPAL:1	345	P	CCT	TGTTCTACAAAATCCTGATT	chr17	57737818	+	60	11	65	0.205847	7	197	66	131	FALSE	FALSE	6	2	0.333333	-12.804	0.233535	Clathrin_H-chain_linker_core	H	1C9L	gi|7245844|pdb|1C9L|A Chain A, Peptide-In-Groove Interactions Link Target Proteins To The B-Propeller Of Clathrin >gi|7245845|pdb|1C9L|B Chain B, Peptide-In-Groove Interactions Link Target Proteins To The B-Propeller Of Clathrin	Library	-1.07	-0.992995	-1.36769	-0.836293	-1.22	-0.965026
ENSG00000141367	ENST00000269122	ENSP00000269122	CLTC	CLTC-001	PRINCIPAL:1	346	D	GAT	GCCATTCTCAGAGCCAAATC	chr17	57737820	-	21	32	53	0.206444	7	197	68	129	FALSE	FALSE	6	2	0.333333	-12.053	0.225873	Clathrin_H-chain_linker_core	H	1C9L	gi|7245844|pdb|1C9L|A Chain A, Peptide-In-Groove Interactions Link Target Proteins To The B-Propeller Of Clathrin >gi|7245845|pdb|1C9L|B Chain B, Peptide-In-Groove Interactions Link Target Proteins To The B-Propeller Of Clathrin	Library	-1.29	-0.975296	-0.406965	-0.811677	-1.04	-0.961394
ENSG00000141367	ENST00000269122	ENSP00000269122	CLTC	CLTC-001	PRINCIPAL:1	346	D	GAT	TGTTCTACAAAATCCTGATT	chr17	57737818	+	60	11	65	0.206444	7	197	66	131	FALSE	FALSE	6	2	0.333333	-12.053	0.225873	Clathrin_H-chain_linker_core	H	1C9L	gi|7245844|pdb|1C9L|A Chain A, Peptide-In-Groove Interactions Link Target Proteins To The B-Propeller Of Clathrin >gi|7245845|pdb|1C9L|B Chain B, Peptide-In-Groove Interactions Link Target Proteins To The B-Propeller Of Clathrin	Library	-1.07	-0.975296	-1.36769	-0.811677	-1.22	-0.961394
ENSG00000141367	ENST00000269122	ENSP00000269122	CLTC	CLTC-001	PRINCIPAL:1	347	L	TTG								0.207041	7	197			FALSE		6			-11.415	0.229935	Clathrin_H-chain_linker_core	H	1C9L	gi|7245844|pdb|1C9L|A Chain A, Peptide-In-Groove Interactions Link Target Proteins To The B-Propeller Of Clathrin >gi|7245845|pdb|1C9L|B Chain B, Peptide-In-Groove Interactions Link Target Proteins To The B-Propeller Of Clathrin	Library		-0.976713		-0.801272		-0.970066
ENSG00000141367	ENST00000269122	ENSP00000269122	CLTC	CLTC-001	PRINCIPAL:1	348	A	GCT								0.207637	7	197			FALSE		6			-10.195	0.223192	Clathrin_H-chain_linker_core	H	1C9L	gi|7245844|pdb|1C9L|A Chain A, Peptide-In-Groove Interactions Link Target Proteins To The B-Propeller Of Clathrin >gi|7245845|pdb|1C9L|B Chain B, Peptide-In-Groove Interactions Link Target Proteins To The B-Propeller Of Clathrin	Library		-0.969527		-0.785588		-0.973797
ENSG00000141367	ENST00000269122	ENSP00000269122	CLTC	CLTC-001	PRINCIPAL:1	349	L	CTG	TCCTGATTTGGCTCTGAGAA	chr17	57737830	+	35	50	57	0.208234	7	197	78	119	FALSE	FALSE	6	2	0.333333	-10.982	0.207784	Clathrin_H-chain_linker_core	H	1C9L	gi|7245844|pdb|1C9L|A Chain A, Peptide-In-Groove Interactions Link Target Proteins To The B-Propeller Of Clathrin >gi|7245845|pdb|1C9L|B Chain B, Peptide-In-Groove Interactions Link Target Proteins To The B-Propeller Of Clathrin	Library	1.06	-0.954247	0.935402	-0.764149	0.97	-0.972356
ENSG00000141367	ENST00000269122	ENSP00000269122	CLTC	CLTC-001	PRINCIPAL:1	350	R	AGA	TCCTGATTTGGCTCTGAGAA	chr17	57737830	+	35	50	57	0.208831	7	197	78	119	FALSE	FALSE	6	2	0.333333	-11.552	0.203817	Clathrin_H-chain_linker_core	H	1C9L	gi|7245844|pdb|1C9L|A Chain A, Peptide-In-Groove Interactions Link Target Proteins To The B-Propeller Of Clathrin >gi|7245845|pdb|1C9L|B Chain B, Peptide-In-Groove Interactions Link Target Proteins To The B-Propeller Of Clathrin	Library	1.06	-0.93954	0.935402	-0.743906	0.97	-0.971216
ENSG00000141367	ENST00000269122	ENSP00000269122	CLTC	CLTC-001	PRINCIPAL:1	351	M	ATG								0.209427	7	197			FALSE		6			-10.205	0.208517	Clathrin_H-chain_linker_core	H	1C9L	gi|7245844|pdb|1C9L|A Chain A, Peptide-In-Groove Interactions Link Target Proteins To The B-Propeller Of Clathrin >gi|7245845|pdb|1C9L|B Chain B, Peptide-In-Groove Interactions Link Target Proteins To The B-Propeller Of Clathrin	Library		-0.942791		-0.740592		-0.983766
ENSG00000141367	ENST00000269122	ENSP00000269122	CLTC	CLTC-001	PRINCIPAL:1	352	A	GCT								0.210024	7	197			FALSE		6			-11.465	0.217382	Clathrin_H-chain_linker_core	H	1C9L	gi|7245844|pdb|1C9L|A Chain A, Peptide-In-Groove Interactions Link Target Proteins To The B-Propeller Of Clathrin >gi|7245845|pdb|1C9L|B Chain B, Peptide-In-Groove Interactions Link Target Proteins To The B-Propeller Of Clathrin	Library		-0.928651		-0.722527		-0.984289
ENSG00000141367	ENST00000269122	ENSP00000269122	CLTC	CLTC-001	PRINCIPAL:1	353	V	GTA								0.210621	7	197			FALSE		6			-10.26	0.248969	Clathrin_H-chain_linker_core	H	1C9L	gi|7245844|pdb|1C9L|A Chain A, Peptide-In-Groove Interactions Link Target Proteins To The B-Propeller Of Clathrin >gi|7245845|pdb|1C9L|B Chain B, Peptide-In-Groove Interactions Link Target Proteins To The B-Propeller Of Clathrin	Library		-0.913725		-0.704504		-0.985442
ENSG00000141367	ENST00000269122	ENSP00000269122	CLTC	CLTC-001	PRINCIPAL:1	354	R	CGT								0.211217	7	197			FALSE		6			-11.499	0.273661	Clathrin_H-chain_linker_core	H	1C9L	gi|7245844|pdb|1C9L|A Chain A, Peptide-In-Groove Interactions Link Target Proteins To The B-Propeller Of Clathrin >gi|7245845|pdb|1C9L|B Chain B, Peptide-In-Groove Interactions Link Target Proteins To The B-Propeller Of Clathrin	Library		-0.898621		-0.687209		-0.987985
ENSG00000141367	ENST00000269122	ENSP00000269122	CLTC	CLTC-001	PRINCIPAL:1	355	N	AAT								0.211814	7	197			FALSE		6			-9.3	0.287935		H	1C9L	gi|7245844|pdb|1C9L|A Chain A, Peptide-In-Groove Interactions Link Target Proteins To The B-Propeller Of Clathrin >gi|7245845|pdb|1C9L|B Chain B, Peptide-In-Groove Interactions Link Target Proteins To The B-Propeller Of Clathrin	Library		-0.884739		-0.67204		-0.993358
ENSG00000141367	ENST00000269122	ENSP00000269122	CLTC	CLTC-001	PRINCIPAL:1	356	N	AAC	GCTGTACGTAATAACTTAGC	chr17	57737852	+	93	75	56	0.212411	7	197	100	97	FALSE	FALSE	6	2	0.333333	-9.3	0.306909		C	1C9L	gi|7245844|pdb|1C9L|A Chain A, Peptide-In-Groove Interactions Link Target Proteins To The B-Propeller Of Clathrin >gi|7245845|pdb|1C9L|B Chain B, Peptide-In-Groove Interactions Link Target Proteins To The B-Propeller Of Clathrin	Library	-1.45	-0.874699	-1.47238	-0.661276	-2.41	-1.00401
ENSG00000141367	ENST00000269122	ENSP00000269122	CLTC	CLTC-001	PRINCIPAL:1	357	L	TTA	GCTGTACGTAATAACTTAGC	chr17	57737852	+	93	75	56	0.213007	7	197	100	97	FALSE	FALSE	6	2	0.333333	-11.513	0.327629		C	1C9L	gi|7245844|pdb|1C9L|A Chain A, Peptide-In-Groove Interactions Link Target Proteins To The B-Propeller Of Clathrin >gi|7245845|pdb|1C9L|B Chain B, Peptide-In-Groove Interactions Link Target Proteins To The B-Propeller Of Clathrin	Library	-1.45	-0.87892	-1.47238	-0.665433	-2.41	-1.02469
ENSG00000141367	ENST00000269122	ENSP00000269122	CLTC	CLTC-001	PRINCIPAL:1	358	A	GCC								0.213604	7	197			FALSE		6			-9.31	0.321842		C	1C9L	gi|7245844|pdb|1C9L|A Chain A, Peptide-In-Groove Interactions Link Target Proteins To The B-Propeller Of Clathrin >gi|7245845|pdb|1C9L|B Chain B, Peptide-In-Groove Interactions Link Target Proteins To The B-Propeller Of Clathrin	Library		-0.882558		-0.666236		-1.05034
ENSG00000141367	ENST00000269122	ENSP00000269122	CLTC	CLTC-001	PRINCIPAL:1	359	G	GGT	GGCAAAGAGTTCTTCAGCAC	chr17	57737860	-	69	59	53	0.2142	7	197	108	89	FALSE	FALSE	6	2	0.333333	-12.797	0.324122		C	1C9L	gi|7245844|pdb|1C9L|A Chain A, Peptide-In-Groove Interactions Link Target Proteins To The B-Propeller Of Clathrin >gi|7245845|pdb|1C9L|B Chain B, Peptide-In-Groove Interactions Link Target Proteins To The B-Propeller Of Clathrin	Library		-0.897623		-0.672806		-1.08685
ENSG00000141367	ENST00000269122	ENSP00000269122	CLTC	CLTC-001	PRINCIPAL:1	360	A	GCT	GGCAAAGAGTTCTTCAGCAC	chr17	57737860	-	69	59	53	0.214797	7	197	108	89	FALSE	FALSE	6	2	0.333333	-11.526	0.332193		H	1C9L	gi|7245844|pdb|1C9L|A Chain A, Peptide-In-Groove Interactions Link Target Proteins To The B-Propeller Of Clathrin >gi|7245845|pdb|1C9L|B Chain B, Peptide-In-Groove Interactions Link Target Proteins To The B-Propeller Of Clathrin	Library		-0.918586		-0.691084		-1.12381
ENSG00000141367	ENST00000269122	ENSP00000269122	CLTC	CLTC-001	PRINCIPAL:1	361	E	GAA								0.215394	7	197			FALSE		6			-11.567	0.340144		H	1UTC	gi|46015850|pdb|1UTC|A Chain A, Clathrin Terminal Domain Complexed With Tlpwdlwtt >gi|46015851|pdb|1UTC|B Chain B, Clathrin Terminal Domain Complexed With Tlpwdlwtt >gi|256599685|pdb|3GC3|B Chain B, Crystal Structure Of Arrestin2s And Clathrin >gi|256599688|pdb|3GD1|I Chain I, Structure Of An ArrestinCLATHRIN COMPLEX REVEALS A NOVEL Clathrin Binding Domain That Modulates Receptor Trafficking	Library		-0.94325		-0.716644		-1.1659
ENSG00000141367	ENST00000269122	ENSP00000269122	CLTC	CLTC-001	PRINCIPAL:1	362	E	GAA								0.21599	7	197			FALSE		6			-11.567	0.316088		H	1UTC	gi|46015850|pdb|1UTC|A Chain A, Clathrin Terminal Domain Complexed With Tlpwdlwtt >gi|46015851|pdb|1UTC|B Chain B, Clathrin Terminal Domain Complexed With Tlpwdlwtt >gi|256599685|pdb|3GC3|B Chain B, Crystal Structure Of Arrestin2s And Clathrin >gi|256599688|pdb|3GD1|I Chain I, Structure Of An ArrestinCLATHRIN COMPLEX REVEALS A NOVEL Clathrin Binding Domain That Modulates Receptor Trafficking	Library		-0.979284		-0.729216		-1.21411
ENSG00000141367	ENST00000269122	ENSP00000269122	CLTC	CLTC-001	PRINCIPAL:1	363	L	CTC	GTGCTGAAGAACTCTTTGCC	chr17	57737874	+	46	66	55	0.216587	7	197	122	75	FALSE	FALSE	6	2	0.333333	-11.444	0.288554		H	1UTC	gi|46015850|pdb|1UTC|A Chain A, Clathrin Terminal Domain Complexed With Tlpwdlwtt >gi|46015851|pdb|1UTC|B Chain B, Clathrin Terminal Domain Complexed With Tlpwdlwtt >gi|256599685|pdb|3GC3|B Chain B, Crystal Structure Of Arrestin2s And Clathrin >gi|256599688|pdb|3GD1|I Chain I, Structure Of An ArrestinCLATHRIN COMPLEX REVEALS A NOVEL Clathrin Binding Domain That Modulates Receptor Trafficking	Library		-1.02187		-0.741828		-1.2595
ENSG00000141367	ENST00000269122	ENSP00000269122	CLTC	CLTC-001	PRINCIPAL:1	364	F	TTT	GTGCTGAAGAACTCTTTGCC	chr17	57737874	+	46	66	55	0.217184	7	197	122	75	FALSE	FALSE	6	2	0.333333	-12.59	0.259342		H	1UTC	gi|46015850|pdb|1UTC|A Chain A, Clathrin Terminal Domain Complexed With Tlpwdlwtt >gi|46015851|pdb|1UTC|B Chain B, Clathrin Terminal Domain Complexed With Tlpwdlwtt >gi|256599685|pdb|3GC3|B Chain B, Crystal Structure Of Arrestin2s And Clathrin >gi|256599688|pdb|3GD1|I Chain I, Structure Of An ArrestinCLATHRIN COMPLEX REVEALS A NOVEL Clathrin Binding Domain That Modulates Receptor Trafficking	Library		-1.05091		-0.784072		-1.30176
ENSG00000141367	ENST00000269122	ENSP00000269122	CLTC	CLTC-001	PRINCIPAL:1	365	A	GCC								0.21778	7	197			FALSE		6			-9.431	0.236995		H	4G55	gi|399125222|pdb|4G55|A Chain A, Clathrin Terminal Domain Complexed With Pitstop 2	Library		-1.07786		-0.834306		-1.34561
ENSG00000141367	ENST00000269122	ENSP00000269122	CLTC	CLTC-001	PRINCIPAL:1	366	R	CGG	AAAAAGAGCATTAAATTTCC	chr17	57737881	-	49	25	56	0.218377	7	197	129	68	FALSE	FALSE	6	2	0.333333	-11.5	0.223425		H	1BPO	gi|15988511|pdb|1BPO|A Chain A, Clathrin Heavy-Chain Terminal Domain And Linker >gi|15988512|pdb|1BPO|B Chain B, Clathrin Heavy-Chain Terminal Domain And Linker >gi|15988513|pdb|1BPO|C Chain C, Clathrin Heavy-Chain Terminal Domain And Linker	Library	-1.54	-1.09665	-1.84752	-0.914742	-2.42	-1.40162
ENSG00000141367	ENST00000269122	ENSP00000269122	CLTC	CLTC-001	PRINCIPAL:1	366	R	CGG	CAAAAAGAGCATTAAATTTC	chr17	57737882	-	40	3	55	0.218377	7	197	130	67	FALSE	FALSE	6	2	0.333333	-11.5	0.223425		H	1BPO	gi|15988511|pdb|1BPO|A Chain A, Clathrin Heavy-Chain Terminal Domain And Linker >gi|15988512|pdb|1BPO|B Chain B, Clathrin Heavy-Chain Terminal Domain And Linker >gi|15988513|pdb|1BPO|C Chain C, Clathrin Heavy-Chain Terminal Domain And Linker	Library	-1.12	-1.09665	0.430182	-0.914742	0.04	-1.40162
ENSG00000141367	ENST00000269122	ENSP00000269122	CLTC	CLTC-001	PRINCIPAL:1	367	K	AAA	CAAAAAGAGCATTAAATTTC	chr17	57737882	-	40	3	55	0.218974	7	197	130	67	FALSE	FALSE	6	2	0.333333	-11.618	0.215015		H	1BPO	gi|15988511|pdb|1BPO|A Chain A, Clathrin Heavy-Chain Terminal Domain And Linker >gi|15988512|pdb|1BPO|B Chain B, Clathrin Heavy-Chain Terminal Domain And Linker >gi|15988513|pdb|1BPO|C Chain C, Clathrin Heavy-Chain Terminal Domain And Linker	Library	-1.12	-1.11605	0.430182	-0.978017	0.04	-1.44956
ENSG00000141367	ENST00000269122	ENSP00000269122	CLTC	CLTC-001	PRINCIPAL:1	367	K	AAA	AAAAAGAGCATTAAATTTCC	chr17	57737881	-	49	25	56	0.218974	7	197	129	68	FALSE	FALSE	6	2	0.333333	-11.618	0.215015		H	1BPO	gi|15988511|pdb|1BPO|A Chain A, Clathrin Heavy-Chain Terminal Domain And Linker >gi|15988512|pdb|1BPO|B Chain B, Clathrin Heavy-Chain Terminal Domain And Linker >gi|15988513|pdb|1BPO|C Chain C, Clathrin Heavy-Chain Terminal Domain And Linker	Library	-1.54	-1.11605	-1.84752	-0.978017	-2.42	-1.44956
ENSG00000141367	ENST00000269122	ENSP00000269122	CLTC	CLTC-001	PRINCIPAL:1	368	F	TTT								0.21957	7	197			FALSE		6			-13.086	0.203357		H	1BPO	gi|15988511|pdb|1BPO|A Chain A, Clathrin Heavy-Chain Terminal Domain And Linker >gi|15988512|pdb|1BPO|B Chain B, Clathrin Heavy-Chain Terminal Domain And Linker >gi|15988513|pdb|1BPO|C Chain C, Clathrin Heavy-Chain Terminal Domain And Linker	Library		-1.14303		-1.00209		-1.47754
ENSG00000141367	ENST00000269122	ENSP00000269122	CLTC	CLTC-001	PRINCIPAL:1	369	N	AAT								0.220167	7	197			FALSE		6			-10.698	0.210256		H	1BPO	gi|15988511|pdb|1BPO|A Chain A, Clathrin Heavy-Chain Terminal Domain And Linker >gi|15988512|pdb|1BPO|B Chain B, Clathrin Heavy-Chain Terminal Domain And Linker >gi|15988513|pdb|1BPO|C Chain C, Clathrin Heavy-Chain Terminal Domain And Linker	Library		-1.16037		-1.04845		-1.51485
ENSG00000141367	ENST00000269122	ENSP00000269122	CLTC	CLTC-001	PRINCIPAL:1	370	A	GCT								0.220764	7	197			FALSE		6			-8.039	0.218159		H	1BPO	gi|15988511|pdb|1BPO|A Chain A, Clathrin Heavy-Chain Terminal Domain And Linker >gi|15988512|pdb|1BPO|B Chain B, Clathrin Heavy-Chain Terminal Domain And Linker >gi|15988513|pdb|1BPO|C Chain C, Clathrin Heavy-Chain Terminal Domain And Linker	Library		-1.18046		-1.079		-1.54263
ENSG00000141367	ENST00000269122	ENSP00000269122	CLTC	CLTC-001	PRINCIPAL:1	371	L	CTT								0.22136	7	197			FALSE		6			-11.179	0.217569		H	1BPO	gi|15988511|pdb|1BPO|A Chain A, Clathrin Heavy-Chain Terminal Domain And Linker >gi|15988512|pdb|1BPO|B Chain B, Clathrin Heavy-Chain Terminal Domain And Linker >gi|15988513|pdb|1BPO|C Chain C, Clathrin Heavy-Chain Terminal Domain And Linker	Library		-1.20298		-1.10662		-1.56855
ENSG00000141367	ENST00000269122	ENSP00000269122	CLTC	CLTC-001	PRINCIPAL:1	372	F	TTT	ATTTAATGCTCTTTTTGCCC	chr17	57737899	+	26	59	66	0.221957	7	197	147	50	FALSE	FALSE	6	2	0.333333	-12.666	0.244496		H	1BPO	gi|15988511|pdb|1BPO|A Chain A, Clathrin Heavy-Chain Terminal Domain And Linker >gi|15988512|pdb|1BPO|B Chain B, Clathrin Heavy-Chain Terminal Domain And Linker >gi|15988513|pdb|1BPO|C Chain C, Clathrin Heavy-Chain Terminal Domain And Linker	Library		-1.22356		-1.13709		-1.59545
ENSG00000141367	ENST00000269122	ENSP00000269122	CLTC	CLTC-001	PRINCIPAL:1	372	F	TTT	TTTAATGCTCTTTTTGCCCA	chr17	57737900	+	43	59	65	0.221957	7	197	148	49	FALSE	FALSE	6	2	0.333333	-12.666	0.244496		H	1BPO	gi|15988511|pdb|1BPO|A Chain A, Clathrin Heavy-Chain Terminal Domain And Linker >gi|15988512|pdb|1BPO|B Chain B, Clathrin Heavy-Chain Terminal Domain And Linker >gi|15988513|pdb|1BPO|C Chain C, Clathrin Heavy-Chain Terminal Domain And Linker	Library		-1.22356		-1.13709		-1.59545
ENSG00000141367	ENST00000269122	ENSP00000269122	CLTC	CLTC-001	PRINCIPAL:1	373	A	GCC	ATTTAATGCTCTTTTTGCCC	chr17	57737899	+	26	59	66	0.222554	7	197	147	50	FALSE	FALSE	6	2	0.333333	-9.538	0.28219		H	1BPO	gi|15988511|pdb|1BPO|A Chain A, Clathrin Heavy-Chain Terminal Domain And Linker >gi|15988512|pdb|1BPO|B Chain B, Clathrin Heavy-Chain Terminal Domain And Linker >gi|15988513|pdb|1BPO|C Chain C, Clathrin Heavy-Chain Terminal Domain And Linker	Library		-1.23729		-1.16081		-1.6153
ENSG00000141367	ENST00000269122	ENSP00000269122	CLTC	CLTC-001	PRINCIPAL:1	373	A	GCC	TTTAATGCTCTTTTTGCCCA	chr17	57737900	+	43	59	65	0.222554	7	197	148	49	FALSE	FALSE	6	2	0.333333	-9.538	0.28219		H	1BPO	gi|15988511|pdb|1BPO|A Chain A, Clathrin Heavy-Chain Terminal Domain And Linker >gi|15988512|pdb|1BPO|B Chain B, Clathrin Heavy-Chain Terminal Domain And Linker >gi|15988513|pdb|1BPO|C Chain C, Clathrin Heavy-Chain Terminal Domain And Linker	Library		-1.23729		-1.16081		-1.6153
ENSG00000141367	ENST00000269122	ENSP00000269122	CLTC	CLTC-001	PRINCIPAL:1	374	Q	CAG	TGCCTCCGAGTAATTTCCCT	chr17	57737905	-	78	56	66	0.22315	7	197	153	44	FALSE	FALSE	6	2	0.333333	-10.371	0.308222		C	1BPO	gi|15988511|pdb|1BPO|A Chain A, Clathrin Heavy-Chain Terminal Domain And Linker >gi|15988512|pdb|1BPO|B Chain B, Clathrin Heavy-Chain Terminal Domain And Linker >gi|15988513|pdb|1BPO|C Chain C, Clathrin Heavy-Chain Terminal Domain And Linker	Library		-1.2526		-1.18246		-1.63354
ENSG00000141367	ENST00000269122	ENSP00000269122	CLTC	CLTC-001	PRINCIPAL:1	374	Q	CAG	CTGCCTCCGAGTAATTTCCC	chr17	57737906	-	81	43	65	0.22315	7	197	154	43	FALSE	FALSE	6	2	0.333333	-10.371	0.308222		C	1BPO	gi|15988511|pdb|1BPO|A Chain A, Clathrin Heavy-Chain Terminal Domain And Linker >gi|15988512|pdb|1BPO|B Chain B, Clathrin Heavy-Chain Terminal Domain And Linker >gi|15988513|pdb|1BPO|C Chain C, Clathrin Heavy-Chain Terminal Domain And Linker	Library	-1.38	-1.2526	-0.604204	-1.18246	-1.31	-1.63354
ENSG00000141367	ENST00000269122	ENSP00000269122	CLTC	CLTC-001	PRINCIPAL:1	375	G	GGA	TGCCTCCGAGTAATTTCCCT	chr17	57737905	-	78	56	66	0.223747	7	197	153	44	FALSE	FALSE	6	2	0.333333	-12.067	0.333578		C	1BPO	gi|15988511|pdb|1BPO|A Chain A, Clathrin Heavy-Chain Terminal Domain And Linker >gi|15988512|pdb|1BPO|B Chain B, Clathrin Heavy-Chain Terminal Domain And Linker >gi|15988513|pdb|1BPO|C Chain C, Clathrin Heavy-Chain Terminal Domain And Linker	Library		-1.26673		-1.20028		-1.64813
ENSG00000141367	ENST00000269122	ENSP00000269122	CLTC	CLTC-001	PRINCIPAL:1	375	G	GGA	CTGCCTCCGAGTAATTTCCC	chr17	57737906	-	81	43	65	0.223747	7	197	154	43	FALSE	FALSE	6	2	0.333333	-12.067	0.333578		C	1BPO	gi|15988511|pdb|1BPO|A Chain A, Clathrin Heavy-Chain Terminal Domain And Linker >gi|15988512|pdb|1BPO|B Chain B, Clathrin Heavy-Chain Terminal Domain And Linker >gi|15988513|pdb|1BPO|C Chain C, Clathrin Heavy-Chain Terminal Domain And Linker	Library	-1.38	-1.26673	-0.604204	-1.20028	-1.31	-1.64813
ENSG00000141367	ENST00000269122	ENSP00000269122	CLTC	CLTC-001	PRINCIPAL:1	376	N	AAT	TTTTGCCCAGGGAAATTACT	chr17	57737911	+	38	66	50	0.224344	7	197	159	38	FALSE	FALSE	6	2	0.333333	-9.578	0.357026		C	1BPO	gi|15988511|pdb|1BPO|A Chain A, Clathrin Heavy-Chain Terminal Domain And Linker >gi|15988512|pdb|1BPO|B Chain B, Clathrin Heavy-Chain Terminal Domain And Linker >gi|15988513|pdb|1BPO|C Chain C, Clathrin Heavy-Chain Terminal Domain And Linker	Library		-1.28381		-1.22749		-1.6689
ENSG00000141367	ENST00000269122	ENSP00000269122	CLTC	CLTC-001	PRINCIPAL:1	377	Y	TAC	TGCCCAGGGAAATTACTCGG	chr17	57737914	+	93	99	41	0.22494	7	197	162	35	FALSE	FALSE	6	2	0.333333	-13.555	0.38974		H	1BPO	gi|15988511|pdb|1BPO|A Chain A, Clathrin Heavy-Chain Terminal Domain And Linker >gi|15988512|pdb|1BPO|B Chain B, Clathrin Heavy-Chain Terminal Domain And Linker >gi|15988513|pdb|1BPO|C Chain C, Clathrin Heavy-Chain Terminal Domain And Linker	Library		-1.2989		-1.25215		-1.68652
ENSG00000141367	ENST00000269122	ENSP00000269122	CLTC	CLTC-001	PRINCIPAL:1	377	Y	TAC	TTTTGCCCAGGGAAATTACT	chr17	57737911	+	38	66	50	0.22494	7	197	159	38	FALSE	FALSE	6	2	0.333333	-13.555	0.38974		H	1BPO	gi|15988511|pdb|1BPO|A Chain A, Clathrin Heavy-Chain Terminal Domain And Linker >gi|15988512|pdb|1BPO|B Chain B, Clathrin Heavy-Chain Terminal Domain And Linker >gi|15988513|pdb|1BPO|C Chain C, Clathrin Heavy-Chain Terminal Domain And Linker	Library		-1.2989		-1.25215		-1.68652
ENSG00000141367	ENST00000269122	ENSP00000269122	CLTC	CLTC-001	PRINCIPAL:1	378	S	TCG	TGCCCAGGGAAATTACTCGG	chr17	57737914	+	93	99	41	0.225537	7	197	162	35	FALSE	FALSE	6	2	0.333333	-9.543	0.414608		H	1BPO	gi|15988511|pdb|1BPO|A Chain A, Clathrin Heavy-Chain Terminal Domain And Linker >gi|15988512|pdb|1BPO|B Chain B, Clathrin Heavy-Chain Terminal Domain And Linker >gi|15988513|pdb|1BPO|C Chain C, Clathrin Heavy-Chain Terminal Domain And Linker	Library		-1.31041		-1.27166		-1.69921
ENSG00000141367	ENST00000269122	ENSP00000269122	CLTC	CLTC-001	PRINCIPAL:1	379	E	GAG								0.226134	7	197			FALSE		6			-12.032	0.440843		H	1BPO	gi|15988511|pdb|1BPO|A Chain A, Clathrin Heavy-Chain Terminal Domain And Linker >gi|15988512|pdb|1BPO|B Chain B, Clathrin Heavy-Chain Terminal Domain And Linker >gi|15988513|pdb|1BPO|C Chain C, Clathrin Heavy-Chain Terminal Domain And Linker	Library		-1.3173		-1.28672		-1.7068
ENSG00000141367	ENST00000269122	ENSP00000269122	CLTC	CLTC-001	PRINCIPAL:1	380	A	GCA	AAATTACTCGGAGGCAGCAA	chr17	57737923	+	64	72	33	0.22673	7	197	171	26	FALSE	FALSE	6	2	0.333333	-11.338	0.455558		H	1BPO	gi|15988511|pdb|1BPO|A Chain A, Clathrin Heavy-Chain Terminal Domain And Linker >gi|15988512|pdb|1BPO|B Chain B, Clathrin Heavy-Chain Terminal Domain And Linker >gi|15988513|pdb|1BPO|C Chain C, Clathrin Heavy-Chain Terminal Domain And Linker	Library	-1.23	-1.31954	-1.68114	-1.28732	-2.09	-1.70286
ENSG00000141367	ENST00000269122	ENSP00000269122	CLTC	CLTC-001	PRINCIPAL:1	381	A	GCA	AAATTACTCGGAGGCAGCAA	chr17	57737923	+	64	72	33	0.227327	7	197	171	26	FALSE	FALSE	6	2	0.333333	-11.338	0.480253		H	1BPO	gi|15988511|pdb|1BPO|A Chain A, Clathrin Heavy-Chain Terminal Domain And Linker >gi|15988512|pdb|1BPO|B Chain B, Clathrin Heavy-Chain Terminal Domain And Linker >gi|15988513|pdb|1BPO|C Chain C, Clathrin Heavy-Chain Terminal Domain And Linker	Library	-1.23	-1.31639	-1.68114	-1.30255	-2.09	-1.70362
ENSG00000141367	ENST00000269122	ENSP00000269122	CLTC	CLTC-001	PRINCIPAL:1	381	A	GCA	TTACTCGGAGGCAGCAAAGG	chr17	57737926	+	61	78	32	0.227327	7	197	174	23	FALSE	FALSE	6	2	0.333333	-11.338	0.480253		H	1BPO	gi|15988511|pdb|1BPO|A Chain A, Clathrin Heavy-Chain Terminal Domain And Linker >gi|15988512|pdb|1BPO|B Chain B, Clathrin Heavy-Chain Terminal Domain And Linker >gi|15988513|pdb|1BPO|C Chain C, Clathrin Heavy-Chain Terminal Domain And Linker	Library	-1.31	-1.31639	-2.0069	-1.30255	-2.12	-1.70362
ENSG00000141367	ENST00000269122	ENSP00000269122	CLTC	CLTC-001	PRINCIPAL:1	382	K	AAG	TTACTCGGAGGCAGCAAAGG	chr17	57737926	+	61	78	32	0.227924	7	197	174	23	FALSE	FALSE	6	2	0.333333	-11.948	0.460538		H	1BPO	gi|15988511|pdb|1BPO|A Chain A, Clathrin Heavy-Chain Terminal Domain And Linker >gi|15988512|pdb|1BPO|B Chain B, Clathrin Heavy-Chain Terminal Domain And Linker >gi|15988513|pdb|1BPO|C Chain C, Clathrin Heavy-Chain Terminal Domain And Linker	Library	-1.31	-1.30286	-2.0069	-1.31914	-2.12	-1.7
ENSG00000141367	ENST00000269122	ENSP00000269122	CLTC	CLTC-001	PRINCIPAL:1	383	V	GTG								0.22852	7	197			FALSE		6			-11.421	0.443647		H	1BPO	gi|15988511|pdb|1BPO|A Chain A, Clathrin Heavy-Chain Terminal Domain And Linker >gi|15988512|pdb|1BPO|B Chain B, Clathrin Heavy-Chain Terminal Domain And Linker >gi|15988513|pdb|1BPO|C Chain C, Clathrin Heavy-Chain Terminal Domain And Linker	Library		-1.27761		-1.3325		-1.69215
ENSG00000141367	ENST00000269122	ENSP00000269122	CLTC	CLTC-001	PRINCIPAL:1	384	A	GCT								0.229117	7	197			FALSE		6			-11.316	0.430725		H	1BPO	gi|15988511|pdb|1BPO|A Chain A, Clathrin Heavy-Chain Terminal Domain And Linker >gi|15988512|pdb|1BPO|B Chain B, Clathrin Heavy-Chain Terminal Domain And Linker >gi|15988513|pdb|1BPO|C Chain C, Clathrin Heavy-Chain Terminal Domain And Linker	Library		-1.25926		-1.31048		-1.66851
ENSG00000141367	ENST00000269122	ENSP00000269122	CLTC	CLTC-001	PRINCIPAL:1	385	A	GCT								0.229714	7	197			FALSE		6			-11.316	0.417771		H	1BPO	gi|15988511|pdb|1BPO|A Chain A, Clathrin Heavy-Chain Terminal Domain And Linker >gi|15988512|pdb|1BPO|B Chain B, Clathrin Heavy-Chain Terminal Domain And Linker >gi|15988513|pdb|1BPO|C Chain C, Clathrin Heavy-Chain Terminal Domain And Linker	Library		-1.24713		-1.23367		-1.61644
ENSG00000141367	ENST00000269122	ENSP00000269122	CLTC	CLTC-001	PRINCIPAL:1	386	N	AAT								0.23031	7	197			FALSE		6			-9.155	0.406731		H	1BPO	gi|15988511|pdb|1BPO|A Chain A, Clathrin Heavy-Chain Terminal Domain And Linker >gi|15988512|pdb|1BPO|B Chain B, Clathrin Heavy-Chain Terminal Domain And Linker >gi|15988513|pdb|1BPO|C Chain C, Clathrin Heavy-Chain Terminal Domain And Linker	Library		-1.22621		-1.17828		-1.57847
ENSG00000141367	ENST00000269122	ENSP00000269122	CLTC	CLTC-001	PRINCIPAL:1	387	A	GCA	GGTGGCTGCTAATGCACCAA	chr17	57737944	+	80	84	51	0.230907	7	197	192	5	FALSE	FALSE	6	2	0.333333	-11.123	0.417409		C	1BPO	gi|15988511|pdb|1BPO|A Chain A, Clathrin Heavy-Chain Terminal Domain And Linker >gi|15988512|pdb|1BPO|B Chain B, Clathrin Heavy-Chain Terminal Domain And Linker >gi|15988513|pdb|1BPO|C Chain C, Clathrin Heavy-Chain Terminal Domain And Linker	Library	-0.73	-1.21026	-0.75577	-1.07092	-1.05	-1.51886
ENSG00000141367	ENST00000269122	ENSP00000269122	CLTC	CLTC-001	PRINCIPAL:1	388	P	CCA	TTTTCATAACTCTTTACCTT	chr17	57737949	-	44	13	44	0.231504	7	197	197	0	FALSE	FALSE	6	2	0.333333	-14.059	0.414006		C	1BPO	gi|15988511|pdb|1BPO|A Chain A, Clathrin Heavy-Chain Terminal Domain And Linker >gi|15988512|pdb|1BPO|B Chain B, Clathrin Heavy-Chain Terminal Domain And Linker >gi|15988513|pdb|1BPO|C Chain C, Clathrin Heavy-Chain Terminal Domain And Linker	Library		-1.19577		-0.970911		-1.47007
ENSG00000141367	ENST00000269122	ENSP00000269122	CLTC	CLTC-001	PRINCIPAL:1	388	P	CCA	GGTGGCTGCTAATGCACCAA	chr17	57737944	+	80	84	51	0.231504	7	197	192	5	FALSE	FALSE	6	2	0.333333	-14.059	0.414006		C	1BPO	gi|15988511|pdb|1BPO|A Chain A, Clathrin Heavy-Chain Terminal Domain And Linker >gi|15988512|pdb|1BPO|B Chain B, Clathrin Heavy-Chain Terminal Domain And Linker >gi|15988513|pdb|1BPO|C Chain C, Clathrin Heavy-Chain Terminal Domain And Linker	Library	-0.73	-1.19577	-0.75577	-0.970911	-1.05	-1.47007
ENSG00000141367	ENST00000269122	ENSP00000269122	CLTC	CLTC-001	PRINCIPAL:1	389	K	AAG	TTTTCATAACTCTTTACCTT	chr17	57737949	-	44	13	44	0.2321	7	197	197	0	FALSE	FALSE	6	2	0.333333	-11.57	0.404664		C	1BPO	gi|15988511|pdb|1BPO|A Chain A, Clathrin Heavy-Chain Terminal Domain And Linker >gi|15988512|pdb|1BPO|B Chain B, Clathrin Heavy-Chain Terminal Domain And Linker >gi|15988513|pdb|1BPO|C Chain C, Clathrin Heavy-Chain Terminal Domain And Linker	Library		-1.18394		-0.887121		-1.4338
ENSG00000141367	ENST00000269122	ENSP00000269122	CLTC	CLTC-001	PRINCIPAL:1	390	G	GGA								0.232697	8	200			FALSE		6			-13.054	0.399082		C	1BPO	gi|15988511|pdb|1BPO|A Chain A, Clathrin Heavy-Chain Terminal Domain And Linker >gi|15988512|pdb|1BPO|B Chain B, Clathrin Heavy-Chain Terminal Domain And Linker >gi|15988513|pdb|1BPO|C Chain C, Clathrin Heavy-Chain Terminal Domain And Linker	Library		-1.17474		-0.820021		-1.40781
ENSG00000141367	ENST00000269122	ENSP00000269122	CLTC	CLTC-001	PRINCIPAL:1	391	I	ATT								0.233294	8	200			FALSE		6			-11.489	0.391014		C	1BPO	gi|15988511|pdb|1BPO|A Chain A, Clathrin Heavy-Chain Terminal Domain And Linker >gi|15988512|pdb|1BPO|B Chain B, Clathrin Heavy-Chain Terminal Domain And Linker >gi|15988513|pdb|1BPO|C Chain C, Clathrin Heavy-Chain Terminal Domain And Linker	Library		-1.16361		-0.774465		-1.38905
ENSG00000141367	ENST00000269122	ENSP00000269122	CLTC	CLTC-001	PRINCIPAL:1	392	L	CTT								0.23389	8	200			FALSE		6			-11.694	0.367858		C	1BPO	gi|15988511|pdb|1BPO|A Chain A, Clathrin Heavy-Chain Terminal Domain And Linker >gi|15988512|pdb|1BPO|B Chain B, Clathrin Heavy-Chain Terminal Domain And Linker >gi|15988513|pdb|1BPO|C Chain C, Clathrin Heavy-Chain Terminal Domain And Linker	Library		-1.15504		-0.742893		-1.37704
ENSG00000141367	ENST00000269122	ENSP00000269122	CLTC	CLTC-001	PRINCIPAL:1	393	R	CGT								0.234487	8	200			FALSE		6			-12.684	0.362831		C	1BPO	gi|15988511|pdb|1BPO|A Chain A, Clathrin Heavy-Chain Terminal Domain And Linker >gi|15988512|pdb|1BPO|B Chain B, Clathrin Heavy-Chain Terminal Domain And Linker >gi|15988513|pdb|1BPO|C Chain C, Clathrin Heavy-Chain Terminal Domain And Linker	Library		-1.15107		-0.696593		-1.36322
ENSG00000141367	ENST00000269122	ENSP00000269122	CLTC	CLTC-001	PRINCIPAL:1	394	T	ACT								0.235084	8	200			FALSE		6			-12.42	0.379804		C	1BPO	gi|15988511|pdb|1BPO|A Chain A, Clathrin Heavy-Chain Terminal Domain And Linker >gi|15988512|pdb|1BPO|B Chain B, Clathrin Heavy-Chain Terminal Domain And Linker >gi|15988513|pdb|1BPO|C Chain C, Clathrin Heavy-Chain Terminal Domain And Linker	Library		-1.14826		-0.663104		-1.35415
ENSG00000141367	ENST00000269122	ENSP00000269122	CLTC	CLTC-001	PRINCIPAL:1	395	P	CCA	TGGAACCGACGGATAGTGTC	chr17	57738824	-	97	50	65	0.23568	8	200	20	180	FALSE	FALSE	6	2	0.333333	-10.8	0.37613		H	1BPO	gi|15988511|pdb|1BPO|A Chain A, Clathrin Heavy-Chain Terminal Domain And Linker >gi|15988512|pdb|1BPO|B Chain B, Clathrin Heavy-Chain Terminal Domain And Linker >gi|15988513|pdb|1BPO|C Chain C, Clathrin Heavy-Chain Terminal Domain And Linker	Library		-1.14686		-0.632655		-1.34638
ENSG00000141367	ENST00000269122	ENSP00000269122	CLTC	CLTC-001	PRINCIPAL:1	396	D	GAC	TGGAACCGACGGATAGTGTC	chr17	57738824	-	97	50	65	0.236277	8	200	20	180	FALSE	FALSE	6	2	0.333333	-11.02	0.365785		H	1BPO	gi|15988511|pdb|1BPO|A Chain A, Clathrin Heavy-Chain Terminal Domain And Linker >gi|15988512|pdb|1BPO|B Chain B, Clathrin Heavy-Chain Terminal Domain And Linker >gi|15988513|pdb|1BPO|C Chain C, Clathrin Heavy-Chain Terminal Domain And Linker	Library		-1.14484		-0.602492		-1.33461
ENSG00000141367	ENST00000269122	ENSP00000269122	CLTC	CLTC-001	PRINCIPAL:1	397	T	ACT	GTACTCCAGACACTATCCGT	chr17	57738830	+	97	99	58	0.236874	8	200	26	174	FALSE	FALSE	6	2	0.333333	-12.475	0.362627		H	1BPO	gi|15988511|pdb|1BPO|A Chain A, Clathrin Heavy-Chain Terminal Domain And Linker >gi|15988512|pdb|1BPO|B Chain B, Clathrin Heavy-Chain Terminal Domain And Linker >gi|15988513|pdb|1BPO|C Chain C, Clathrin Heavy-Chain Terminal Domain And Linker	Library		-1.14365		-0.570378		-1.31927
ENSG00000141367	ENST00000269122	ENSP00000269122	CLTC	CLTC-001	PRINCIPAL:1	398	I	ATC	GTACTCCAGACACTATCCGT	chr17	57738830	+	97	99	58	0.23747	8	200	26	174	FALSE	FALSE	6	2	0.333333	-11.589	0.368368		H	1BPO	gi|15988511|pdb|1BPO|A Chain A, Clathrin Heavy-Chain Terminal Domain And Linker >gi|15988512|pdb|1BPO|B Chain B, Clathrin Heavy-Chain Terminal Domain And Linker >gi|15988513|pdb|1BPO|C Chain C, Clathrin Heavy-Chain Terminal Domain And Linker	Library		-1.14608		-0.546463		-1.31185
ENSG00000141367	ENST00000269122	ENSP00000269122	CLTC	CLTC-001	PRINCIPAL:1	399	R	CGT	CTGGGACACTCTGGAACCGA	chr17	57738835	-	82	78	57	0.238067	8	200	31	169	FALSE	FALSE	6	2	0.333333	-9.793	0.379783		H	1BPO	gi|15988511|pdb|1BPO|A Chain A, Clathrin Heavy-Chain Terminal Domain And Linker >gi|15988512|pdb|1BPO|B Chain B, Clathrin Heavy-Chain Terminal Domain And Linker >gi|15988513|pdb|1BPO|C Chain C, Clathrin Heavy-Chain Terminal Domain And Linker	Library	-1.63	-1.14683	-2.13251	-0.514223	-2.65	-1.29398
ENSG00000141367	ENST00000269122	ENSP00000269122	CLTC	CLTC-001	PRINCIPAL:1	400	R	CGG	CTGGGACACTCTGGAACCGA	chr17	57738835	-	82	78	57	0.238663	8	200	31	169	FALSE	FALSE	6	2	0.333333	-9.793	0.390497		H	1BPO	gi|15988511|pdb|1BPO|A Chain A, Clathrin Heavy-Chain Terminal Domain And Linker >gi|15988512|pdb|1BPO|B Chain B, Clathrin Heavy-Chain Terminal Domain And Linker >gi|15988513|pdb|1BPO|C Chain C, Clathrin Heavy-Chain Terminal Domain And Linker	Library	-1.63	-1.14856	-2.13251	-0.479337	-2.65	-1.27467
ENSG00000141367	ENST00000269122	ENSP00000269122	CLTC	CLTC-001	PRINCIPAL:1	401	F	TTC								0.23926	8	200			FALSE		6			-13.514	0.41601		H	1BPO	gi|15988511|pdb|1BPO|A Chain A, Clathrin Heavy-Chain Terminal Domain And Linker >gi|15988512|pdb|1BPO|B Chain B, Clathrin Heavy-Chain Terminal Domain And Linker >gi|15988513|pdb|1BPO|C Chain C, Clathrin Heavy-Chain Terminal Domain And Linker	Library		-1.15151		-0.44405		-1.25544
ENSG00000141367	ENST00000269122	ENSP00000269122	CLTC	CLTC-001	PRINCIPAL:1	402	Q	CAG	CTGGCTGGGCTGGGACACTC	chr17	57738844	-	43	16	64	0.239857	8	200	40	160	FALSE	FALSE	6	2	0.333333	-12.468	0.438406		H	1BPO	gi|15988511|pdb|1BPO|A Chain A, Clathrin Heavy-Chain Terminal Domain And Linker >gi|15988512|pdb|1BPO|B Chain B, Clathrin Heavy-Chain Terminal Domain And Linker >gi|15988513|pdb|1BPO|C Chain C, Clathrin Heavy-Chain Terminal Domain And Linker	Library	-1.89	-1.15591	-1.0653	-0.41459	-2.13	-1.23984
ENSG00000141367	ENST00000269122	ENSP00000269122	CLTC	CLTC-001	PRINCIPAL:1	403	S	AGT	CTGGCTGGGCTGGGACACTC	chr17	57738844	-	43	16	64	0.240453	8	200	40	160	FALSE	FALSE	6	2	0.333333	-10.474	0.460611		H	1BPO	gi|15988511|pdb|1BPO|A Chain A, Clathrin Heavy-Chain Terminal Domain And Linker >gi|15988512|pdb|1BPO|B Chain B, Clathrin Heavy-Chain Terminal Domain And Linker >gi|15988513|pdb|1BPO|C Chain C, Clathrin Heavy-Chain Terminal Domain And Linker	Library	-1.89	-1.16176	-1.0653	-0.398162	-2.13	-1.23164
ENSG00000141367	ENST00000269122	ENSP00000269122	CLTC	CLTC-001	PRINCIPAL:1	404	V	GTC								0.24105	8	200			FALSE		6			-10.954	0.500033		C	1BPO	gi|15988511|pdb|1BPO|A Chain A, Clathrin Heavy-Chain Terminal Domain And Linker >gi|15988512|pdb|1BPO|B Chain B, Clathrin Heavy-Chain Terminal Domain And Linker >gi|15988513|pdb|1BPO|C Chain C, Clathrin Heavy-Chain Terminal Domain And Linker	Library		-1.17233		-0.409675		-1.24186
ENSG00000141367	ENST00000269122	ENSP00000269122	CLTC	CLTC-001	PRINCIPAL:1	405	P	CCA	AAGTTTGACCTGGCTGGGCT	chr17	57738853	-	28	32	69	0.241647	8	200	49	151	FALSE	FALSE	6	2	0.333333	-12.81	0.536588		C	1BPO	gi|15988511|pdb|1BPO|A Chain A, Clathrin Heavy-Chain Terminal Domain And Linker >gi|15988512|pdb|1BPO|B Chain B, Clathrin Heavy-Chain Terminal Domain And Linker >gi|15988513|pdb|1BPO|C Chain C, Clathrin Heavy-Chain Terminal Domain And Linker	Library	-1.36	-1.19003	0.462445	-0.451942	-0.45	-1.26879
ENSG00000141367	ENST00000269122	ENSP00000269122	CLTC	CLTC-001	PRINCIPAL:1	405	P	CCA	GAAGTTTGACCTGGCTGGGC	chr17	57738854	-	49	16	68	0.241647	8	200	50	150	FALSE	FALSE	6	2	0.333333	-12.81	0.536588		C	1BPO	gi|15988511|pdb|1BPO|A Chain A, Clathrin Heavy-Chain Terminal Domain And Linker >gi|15988512|pdb|1BPO|B Chain B, Clathrin Heavy-Chain Terminal Domain And Linker >gi|15988513|pdb|1BPO|C Chain C, Clathrin Heavy-Chain Terminal Domain And Linker	Library	-0.87	-1.19003	0.540886	-0.451942	0.6	-1.26879
ENSG00000141367	ENST00000269122	ENSP00000269122	CLTC	CLTC-001	PRINCIPAL:1	406	A	GCC	CAGAGTGTCCCAGCCCAGCC	chr17	57738856	+	31	59	63	0.242243	8	200	52	148	FALSE	FALSE	6	2	0.333333	-9.908	0.565831		C	1BPO	gi|15988511|pdb|1BPO|A Chain A, Clathrin Heavy-Chain Terminal Domain And Linker >gi|15988512|pdb|1BPO|B Chain B, Clathrin Heavy-Chain Terminal Domain And Linker >gi|15988513|pdb|1BPO|C Chain C, Clathrin Heavy-Chain Terminal Domain And Linker	Library	-0.94	-1.2061	-0.855618	-0.495019	-1.33	-1.28975
ENSG00000141367	ENST00000269122	ENSP00000269122	CLTC	CLTC-001	PRINCIPAL:1	406	A	GCC	AAGTTTGACCTGGCTGGGCT	chr17	57738853	-	28	32	69	0.242243	8	200	49	151	FALSE	FALSE	6	2	0.333333	-9.908	0.565831		C	1BPO	gi|15988511|pdb|1BPO|A Chain A, Clathrin Heavy-Chain Terminal Domain And Linker >gi|15988512|pdb|1BPO|B Chain B, Clathrin Heavy-Chain Terminal Domain And Linker >gi|15988513|pdb|1BPO|C Chain C, Clathrin Heavy-Chain Terminal Domain And Linker	Library	-1.36	-1.2061	0.462445	-0.495019	-0.45	-1.28975
ENSG00000141367	ENST00000269122	ENSP00000269122	CLTC	CLTC-001	PRINCIPAL:1	406	A	GCC	GAAGTTTGACCTGGCTGGGC	chr17	57738854	-	49	16	68	0.242243	8	200	50	150	FALSE	FALSE	6	2	0.333333	-9.908	0.565831		C	1BPO	gi|15988511|pdb|1BPO|A Chain A, Clathrin Heavy-Chain Terminal Domain And Linker >gi|15988512|pdb|1BPO|B Chain B, Clathrin Heavy-Chain Terminal Domain And Linker >gi|15988513|pdb|1BPO|C Chain C, Clathrin Heavy-Chain Terminal Domain And Linker	Library	-0.87	-1.2061	0.540886	-0.495019	0.6	-1.28975
ENSG00000141367	ENST00000269122	ENSP00000269122	CLTC	CLTC-001	PRINCIPAL:1	407	Q	CAG	AGGAGAAGTTTGACCTGGCT	chr17	57738858	-	60	56	74	0.24284	8	200	54	146	FALSE	FALSE	6	2	0.333333	-10.346	0.600681		C	1BPO	gi|15988511|pdb|1BPO|A Chain A, Clathrin Heavy-Chain Terminal Domain And Linker >gi|15988512|pdb|1BPO|B Chain B, Clathrin Heavy-Chain Terminal Domain And Linker >gi|15988513|pdb|1BPO|C Chain C, Clathrin Heavy-Chain Terminal Domain And Linker	Library	-1.02	-1.21698	0.363184	-0.526975	-1.3	-1.29987
ENSG00000141367	ENST00000269122	ENSP00000269122	CLTC	CLTC-001	PRINCIPAL:1	407	Q	CAG	GAGGAGAAGTTTGACCTGGC	chr17	57738859	-	66	25	72	0.24284	8	200	55	145	FALSE	FALSE	6	2	0.333333	-10.346	0.600681		C	1BPO	gi|15988511|pdb|1BPO|A Chain A, Clathrin Heavy-Chain Terminal Domain And Linker >gi|15988512|pdb|1BPO|B Chain B, Clathrin Heavy-Chain Terminal Domain And Linker >gi|15988513|pdb|1BPO|C Chain C, Clathrin Heavy-Chain Terminal Domain And Linker	Library	-0.35	-1.21698	0.465646	-0.526975	0.46	-1.29987
ENSG00000141367	ENST00000269122	ENSP00000269122	CLTC	CLTC-001	PRINCIPAL:1	407	Q	CAG	CAGAGTGTCCCAGCCCAGCC	chr17	57738856	+	31	59	63	0.24284	8	200	52	148	FALSE	FALSE	6	2	0.333333	-10.346	0.600681		C	1BPO	gi|15988511|pdb|1BPO|A Chain A, Clathrin Heavy-Chain Terminal Domain And Linker >gi|15988512|pdb|1BPO|B Chain B, Clathrin Heavy-Chain Terminal Domain And Linker >gi|15988513|pdb|1BPO|C Chain C, Clathrin Heavy-Chain Terminal Domain And Linker	Library	-0.94	-1.21698	-0.855618	-0.526975	-1.33	-1.29987
ENSG00000141367	ENST00000269122	ENSP00000269122	CLTC	CLTC-001	PRINCIPAL:1	408	P	CCA	AGTAGAGGAGAAGTTTGACC	chr17	57738863	-	54	81	64	0.243437	8	200	59	141	FALSE	FALSE	6	2	0.333333	-11.049	0.572864		C	1BPO	gi|15988511|pdb|1BPO|A Chain A, Clathrin Heavy-Chain Terminal Domain And Linker >gi|15988512|pdb|1BPO|B Chain B, Clathrin Heavy-Chain Terminal Domain And Linker >gi|15988513|pdb|1BPO|C Chain C, Clathrin Heavy-Chain Terminal Domain And Linker	Library	-1.21	-1.22172	0.172464	-0.52911	-1.84	-1.29505
ENSG00000141367	ENST00000269122	ENSP00000269122	CLTC	CLTC-001	PRINCIPAL:1	408	P	CCA	AGGAGAAGTTTGACCTGGCT	chr17	57738858	-	60	56	74	0.243437	8	200	54	146	FALSE	FALSE	6	2	0.333333	-11.049	0.572864		C	1BPO	gi|15988511|pdb|1BPO|A Chain A, Clathrin Heavy-Chain Terminal Domain And Linker >gi|15988512|pdb|1BPO|B Chain B, Clathrin Heavy-Chain Terminal Domain And Linker >gi|15988513|pdb|1BPO|C Chain C, Clathrin Heavy-Chain Terminal Domain And Linker	Library	-1.02	-1.22172	0.363184	-0.52911	-1.3	-1.29505
ENSG00000141367	ENST00000269122	ENSP00000269122	CLTC	CLTC-001	PRINCIPAL:1	408	P	CCA	GAGGAGAAGTTTGACCTGGC	chr17	57738859	-	66	25	72	0.243437	8	200	55	145	FALSE	FALSE	6	2	0.333333	-11.049	0.572864		C	1BPO	gi|15988511|pdb|1BPO|A Chain A, Clathrin Heavy-Chain Terminal Domain And Linker >gi|15988512|pdb|1BPO|B Chain B, Clathrin Heavy-Chain Terminal Domain And Linker >gi|15988513|pdb|1BPO|C Chain C, Clathrin Heavy-Chain Terminal Domain And Linker	Library	-0.35	-1.22172	0.465646	-0.52911	0.46	-1.29505
ENSG00000141367	ENST00000269122	ENSP00000269122	CLTC	CLTC-001	PRINCIPAL:1	409	G	GGT	AGTAGAGGAGAAGTTTGACC	chr17	57738863	-	54	81	64	0.244033	8	200	59	141	FALSE	FALSE	6	2	0.333333	-11.341	0.55963		C	1BPO	gi|15988511|pdb|1BPO|A Chain A, Clathrin Heavy-Chain Terminal Domain And Linker >gi|15988512|pdb|1BPO|B Chain B, Clathrin Heavy-Chain Terminal Domain And Linker >gi|15988513|pdb|1BPO|C Chain C, Clathrin Heavy-Chain Terminal Domain And Linker	Library	-1.21	-1.22663	0.172464	-0.535006	-1.84	-1.29214
ENSG00000141367	ENST00000269122	ENSP00000269122	CLTC	CLTC-001	PRINCIPAL:1	410	Q	CAA								0.24463	8	200			FALSE		6			-9.995	0.552232		C	1BPO	gi|15988511|pdb|1BPO|A Chain A, Clathrin Heavy-Chain Terminal Domain And Linker >gi|15988512|pdb|1BPO|B Chain B, Clathrin Heavy-Chain Terminal Domain And Linker >gi|15988513|pdb|1BPO|C Chain C, Clathrin Heavy-Chain Terminal Domain And Linker	Library		-1.23147		-0.547173		-1.29269
ENSG00000141367	ENST00000269122	ENSP00000269122	CLTC	CLTC-001	PRINCIPAL:1	411	T	ACT								0.245227	8	200			FALSE		6			-8.324	0.506528		C	1BPO	gi|15988511|pdb|1BPO|A Chain A, Clathrin Heavy-Chain Terminal Domain And Linker >gi|15988512|pdb|1BPO|B Chain B, Clathrin Heavy-Chain Terminal Domain And Linker >gi|15988513|pdb|1BPO|C Chain C, Clathrin Heavy-Chain Terminal Domain And Linker	Library		-1.23576		-0.570218		-1.29565
ENSG00000141367	ENST00000269122	ENSP00000269122	CLTC	CLTC-001	PRINCIPAL:1	412	S	TCT								0.245823	8	200			FALSE		6			-9.496	0.438456		C	1BPO	gi|15988511|pdb|1BPO|A Chain A, Clathrin Heavy-Chain Terminal Domain And Linker >gi|15988512|pdb|1BPO|B Chain B, Clathrin Heavy-Chain Terminal Domain And Linker >gi|15988513|pdb|1BPO|C Chain C, Clathrin Heavy-Chain Terminal Domain And Linker	Library		-1.23742		-0.594341		-1.29549
[truncated: 169,159 more rows]

## Sheet: Donovan et al.
ensembl_gene_id	ensembl_transcript_id	ensembl_peptide_id	gene_name	transcript_name	APPRIS	position	AA	codon	guide	chrom	DSB_Coordinate	strand	offtarget_score	doench_score	oof_score	gene_fraction	Exon	Exon_Length	distance_5_exon_border	distance_3_exon_border	Exon_Multiple_of_3	escapeNMD	num_transcripts	targeted_transcripts	targeted_transcripts_frac	provean_score	disorder_score	Interpro_Description	PDB_id	PDB_description	SecStruct	control	A375-selumetinib	A375-selumetinib_LOESS	A375-vemurafenib	A375-vemurafenib_LOESS	MELJUSO-selumetinib	MELJUSO-selumetinib_LOESS
[truncated: 1,487 more rows]

[truncated: 2 more sheets: Brenan et al., MYB,ZBTB7A]
